# Supplementary material for: Genome-Wide ChIPseq Analysis of AhR, COUP-TF, and HNF4 Enrichment in TCDD-Treated Mouse Liver
Source: Int J Mol Sci. 2022 Jan 29;23(3):1558. doi: 10.3390/ijms23031558 (PMC8836158; doi:10.3390/ijms23031558)
Supplement: Supplementary file 1 [file ijms-23-01558-s001.zip]

Archive with 4 entries (4 files):
- Supplemenatry_File S1.xlsx
- Supplemenatry_File S2.xlsx
- Supplementary_Figure S1.pdf
- Supplementary_File S3.xlsx
