# Supplementary material for: Genome-Wide ChIPseq Analysis of AhR, COUP-TF, and HNF4 Enrichment in TCDD-Treated Mouse Liver
Source: Int J Mol Sci. 2022 Jan 29;23(3):1558. doi: 10.3390/ijms23031558 (PMC8836158; doi:10.3390/ijms23031558)
Supplement: Supplementary file 1 [file ijms-23-01558-s001.zip › Supplemenatry_File S1.xlsx]

## Sheet: AhR_All_Diff_Enriched
Motif Name	Consensus	P-value	Log P-value	q-value (Benjamini)	# of Target Sequences with Motif(of 15565)	% of Target Sequences with Motif	# of Background Sequences with Motif(of 32297)	% of Background Sequences with Motif
Arnt:Ahr(bHLH)/MCF7-Arnt-ChIP-Seq(Lo_et_al.)/Homer	TBGCACGCAA	1e-1475	-3398	0	4906	0.3152	2709.7	0.0839
CEBP(bZIP)/ThioMac-CEBPb-ChIP-Seq(GSE21512)/Homer	ATTGCGCAAC	1e-580	-1338	0	2543	0.1634	1635.7	0.0506
HNF4a(NR),DR1/HepG2-HNF4a-ChIP-Seq(GSE25021)/Homer	CARRGKBCAAAGTYCA	1e-468	-1079	0	2032	0.1305	1282.4	0.0397
HLF(bZIP)/HSC-HLF.Flag-ChIP-Seq(GSE69817)/Homer	RTTATGYAAB	1e-413	-951.5	0	2412	0.155	1867.5	0.0578
NFIL3(bZIP)/HepG2-NFIL3-ChIP-Seq(Encode)/Homer	VTTACGTAAYNNNNN	1e-386	-890.2	0	2045	0.1314	1478.6	0.0458
HIF-1b(HLH)/T47D-HIF1b-ChIP-Seq(GSE59937)/Homer	RTACGTGC	1e-375	-864.5	0	4289	0.2756	4734	0.1466
PPARa(NR),DR1/Liver-Ppara-ChIP-Seq(GSE47954)/Homer	VNAGGKCAAAGGTCA	1e-375	-863.5	0	3160	0.203	3010.9	0.0932
COUP-TFII(NR)/K562-NR2F1-ChIP-Seq(Encode)/Homer	GKBCARAGGTCA	1e-316	-729	0	3905	0.2509	4399.8	0.1362
EAR2(NR)/K562-NR2F6-ChIP-Seq(Encode)/Homer	NRBCARRGGTCA	1e-275	-634.3	0	3496	0.2246	3949.8	0.1223
RARa(NR)/K562-RARa-ChIP-Seq(Encode)/Homer	TTGAMCTTTG	1e-268	-617.7	0	6608	0.4245	9442.6	0.2923
HNF6(Homeobox)/Liver-Hnf6-ChIP-Seq(ERP000394)/Homer	NTATYGATCH	1e-251	-578.4	0	1618	0.104	1304.4	0.0404
Cux2(Homeobox)/Liver-Cux2-ChIP-Seq(GSE35985)/Homer	HNRAATCAAT	1e-245	-564.3	0	1371	0.0881	1012.2	0.0313
ATAF1(NAC)/col-ATAF1-DAP-Seq(GSE60143)/Homer	YACGTMAY	1e-244	-563.9	0	5788	0.3719	8091.4	0.2505
Erra(NR)/HepG2-Erra-ChIP-Seq(GSE31477)/Homer	CAAAGGTCAG	1e-244	-563.6	0	5471	0.3515	7514.1	0.2326
RXR(NR),DR1/3T3L1-RXR-ChIP-Seq(GSE13511)/Homer	TAGGGCAAAGGTCA	1e-236	-544.8	0	2892	0.1858	3190	0.0988
COUP-TFII(NR)/Artia-Nr2f2-ChIP-Seq(GSE46497)/Homer	AGRGGTCA	1e-234	-541.1	0	4201	0.2699	5343.3	0.1654
Foxa2(Forkhead)/Liver-Foxa2-ChIP-Seq(GSE25694)/Homer	CYTGTTTACWYW	1e-230	-531.1	0	2200	0.1413	2174.2	0.0673
PPARE(NR),DR1/3T3L1-Pparg-ChIP-Seq(GSE13511)/Homer	TGACCTTTGCCCCA	1e-226	-522.6	0	2494	0.1602	2625.2	0.0813
CEBP:AP1(bZIP)/ThioMac-CEBPb-ChIP-Seq(GSE21512)/Homer	DRTGTTGCAA	1e-223	-515.4	0	2055	0.132	1992.6	0.0617
FOXA1(Forkhead)/LNCAP-FOXA1-ChIP-Seq(GSE27824)/Homer	WAAGTAAACA	1e-204	-470.6	0	3023	0.1942	3566.9	0.1104
ANAC046(NAC)/colamp-ANAC046-DAP-Seq(GSE60143)/Homer	ACACGYWAYC	1e-200	-460.9	0	4218	0.271	5604.8	0.1735
FOXM1(Forkhead)/MCF7-FOXM1-ChIP-Seq(GSE72977)/Homer	TRTTTACTTW	1e-194	-447.9	0	2706	0.1739	3113.4	0.0964
NAM(NAC)/col-NAM-DAP-Seq(GSE60143)/Homer	RGTTRCGTRW	1e-190	-438.3	0	2936	0.1886	3506	0.1085
Atf4(bZIP)/MEF-Atf4-ChIP-Seq(GSE35681)/Homer	MTGATGCAAT	1e-189	-436.5	0	913	0.0587	606.3	0.0188
Fox:Ebox(Forkhead,bHLH)/Panc1-Foxa2-ChIP-Seq(GSE47459)/Homer	NNNVCTGWGYAAACASN	1e-187	-432.6	0	2711	0.1742	3157.7	0.0978
Foxa3(Forkhead)/Liver-Foxa3-ChIP-Seq(GSE77670)/Homer	BSNTGTTTACWYWGN	1e-185	-426.9	0	1048	0.0673	774.8	0.024
FOXA1(Forkhead)/MCF7-FOXA1-ChIP-Seq(GSE26831)/Homer	WAAGTAAACA	1e-179	-414.1	0	2543	0.1634	2934.6	0.0908
Esrrb(NR)/mES-Esrrb-ChIP-Seq(GSE11431)/Homer	KTGACCTTGA	1e-169	-390.8	0	1874	0.1204	1956.8	0.0606
NAP(NAC)/col-NAP-DAP-Seq(GSE60143)/Homer	ARGTTACGTRTN	1e-168	-387	0	2202	0.1415	2463	0.0762
ANAC038(NAC)/col-ANAC038-DAP-Seq(GSE60143)/Homer	ACACGTWAYC	1e-164	-377.8	0	4520	0.2904	6415.4	0.1986
NF1-halfsite(CTF)/LNCaP-NF1-ChIP-Seq(Unpublished)/Homer	YTGCCAAG	1e-160	-369.5	0	4141	0.266	5765.6	0.1785
ANAC079(NAC)/colamp-ANAC079-DAP-Seq(GSE60143)/Homer	TACACGCAACCT	1e-151	-349.7	0	1223	0.0786	1100.9	0.0341
THRb(NR)/Liver-NR1A2-ChIP-Seq(GSE52613)/Homer	TRAGGTCA	1e-148	-341.1	0	8092	0.5199	13452.3	0.4164
Foxo3(Forkhead)/U2OS-Foxo3-ChIP-Seq(E-MTAB-2701)/Homer	DGTAAACA	1e-143	-331	0	1749	0.1124	1891.6	0.0586
TR4(NR),DR1/Hela-TR4-ChIP-Seq(GSE24685)/Homer	GAGGTCAAAGGTCA	1e-142	-327.7	0	579	0.0372	338.9	0.0105
Chop(bZIP)/MEF-Chop-ChIP-Seq(GSE35681)/Homer	ATTGCATCAT	1e-137	-316.4	0	655	0.0421	430.2	0.0133
NF1(CTF)/LNCAP-NF1-ChIP-Seq(Unpublished)/Homer	CYTGGCABNSTGCCAR	1e-121	-279.8	0	1104	0.0709	1049.1	0.0325
Nur77(NR)/K562-NR4A1-ChIP-Seq(GSE31363)/Homer	TGACCTTTNCNT	1e-113	-261.6	0	595	0.0382	416.1	0.0129
FOXK1(Forkhead)/HEK293-FOXK1-ChIP-Seq(GSE51673)/Homer	NVWTGTTTAC	1e-109	-251.8	0	2196	0.1411	2802.1	0.0867
CUX1(Homeobox)/K562-CUX1-ChIP-Seq(GSE92882)/Homer	TATCGATNAN	1e-109	-251.2	0	1400	0.0899	1536.5	0.0476
FOXK2(Forkhead)/U2OS-FOXK2-ChIP-Seq(E-MTAB-2204)/Homer	SCHTGTTTACAT	1e-109	-251.2	0	1465	0.0941	1635.2	0.0506
ANAC047(NAC)/colamp-ANAC047-DAP-Seq(GSE60143)/Homer	WACACGTAACTT	1e-106	-245.3	0	1600	0.1028	1858	0.0575
PHA-4(Forkhead)/cElegans-Embryos-PHA4-ChIP-Seq(modEncode)/Homer	KTGTTTGC	1e-104	-239.7	0	6770	0.435	11325.1	0.3506
FoxL2(Forkhead)/Ovary-FoxL2-ChIP-Seq(GSE60858)/Homer	WWTRTAAACAVG	1e-101	-234	0	1784	0.1146	2180.7	0.0675
Foxf1(Forkhead)/Lung-Foxf1-ChIP-Seq(GSE77951)/Homer	WWATRTAAACAN	1e-101	-233.4	0	1924	0.1236	2409.5	0.0746
FOXP1(Forkhead)/H9-FOXP1-ChIP-Seq(GSE31006)/Homer	NYYTGTTTACHN	1e-100	-231.8	0	1103	0.0709	1135.1	0.0351
NLP7(RWPRK)/col-NLP7-DAP-Seq(GSE60143)/Homer	TGRCCYTTCR	1e-91	-210.9	0	3766	0.242	5718.9	0.177
Gata4(Zf)/Heart-Gata4-ChIP-Seq(GSE35151)/Homer	NBWGATAAGR	1e-89	-205.2	0	1790	0.115	2273.6	0.0704
AARE(HLH)/mES-cMyc-ChIP-Seq/Homer	GATTGCATCA	1e-88	-204.5	0	329	0.0211	178.5	0.0055
Gata2(Zf)/K562-GATA2-ChIP-Seq(GSE18829)/Homer	BBCTTATCTS	1e-84	-194.3	0	1261	0.081	1456.4	0.0451
Gata6(Zf)/HUG1N-GATA6-ChIP-Seq(GSE51936)/Homer	YCTTATCTBN	1e-83	-191.6	0	1641	0.1054	2070.5	0.0641
dHNF4(NR)/Fly-HNF4-ChIP-Seq(GSE73675)/Homer	GGTCCAAAGTCCAMT	1e-79	-183.7	0	259	0.0166	125.5	0.0039
bHLHE41(bHLH)/proB-Bhlhe41-ChIP-Seq(GSE93764)/Homer	KCACGTGMCN	1e-78	-180.3	0	3075	0.1976	4599.8	0.1424
Gata1(Zf)/K562-GATA1-ChIP-Seq(GSE18829)/Homer	SAGATAAGRV	1e-77	-177.5	0	1116	0.0717	1273.2	0.0394
WRKY18(WRKY)/col-WRKY18-DAP-Seq(GSE60143)/Homer	NNNTTGACYWNNNNN	1e-73	-170.2	0	2785	0.1789	4122.4	0.1276
Foxo1(Forkhead)/RAW-Foxo1-ChIP-Seq(Fan_et_al.)/Homer	CTGTTTAC	1e-71	-164.1	0	3579	0.2299	5603.9	0.1735
Atf1(bZIP)/K562-ATF1-ChIP-Seq(GSE31477)/Homer	GATGACGTCA	1e-70	-161.9	0	1436	0.0923	1825.1	0.0565
GATA3(Zf)/iTreg-Gata3-ChIP-Seq(GSE20898)/Homer	AGATAASR	1e-69	-159.9	0	2480	0.1593	3623.5	0.1122
NF1:FOXA1(CTF,Forkhead)/LNCAP-FOXA1-ChIP-Seq(GSE27824)/Homer	WNTGTTTRYTTTGGCA	1e-68	-157.4	0	255	0.0164	139	0.0043
HNF1b(Homeobox)/PDAC-HNF1B-ChIP-Seq(GSE64557)/Homer	GTTAATNATTAA	1e-66	-152.2	0	409	0.0263	317.2	0.0098
WRKY55(WRKY)/col-WRKY55-DAP-Seq(GSE60143)/Homer	NCGTTGACTT	1e-63	-146.4	0	1948	0.1252	2745.6	0.085
WRKY50(WRKY)/col-WRKY50-DAP-Seq(GSE60143)/Homer	NNTTGACTWNNGNNN	1e-62	-145	0	1736	0.1115	2386	0.0739
WRKY25(WRKY)/colamp-WRKY25-DAP-Seq(GSE60143)/Homer	NNNNHRGTCAAMNNN	1e-62	-142.8	0	1874	0.1204	2631.9	0.0815
Sp5(Zf)/mES-Sp5.Flag-ChIP-Seq(GSE72989)/Homer	RGKGGGCGGAGC	1e-60	-139.5	0	2709	0.174	4130.3	0.1279
WRKY24(WRKY)/colamp-WRKY24-DAP-Seq(GSE60143)/Homer	CGTTGACTWW	1e-56	-130.6	0	1441	0.0926	1937.9	0.06
Tlx?(NR)/NPC-H3K4me1-ChIP-Seq(GSE16256)/Homer	CTGGCAGSCTGCCA	1e-54	-126.3	0	980	0.063	1194.9	0.037
WRKY28(WRKY)/col-WRKY28-DAP-Seq(GSE60143)/Homer	BGTTGACTWH	1e-52	-121.9	0	2088	0.1341	3097.7	0.0959
RBFox2(?)/Heart-RBFox2-CLIP-Seq(GSE57926)/Homer	TGCATGCA	1e-52	-121.7	0	4044	0.2598	6731.2	0.2084
FXR(NR),IR1/Liver-FXR-ChIP-Seq(Chong_et_al.)/Homer	AGGTCANTGACCTB	1e-51	-118.6	0	868	0.0558	1038.8	0.0322
WRKY6(WRKY)/colamp-WRKY6-DAP-Seq(GSE60143)/Homer	NCGTTGACTWWD	1e-50	-115.4	0	1443	0.0927	1997.7	0.0618
WRKY15(WRKY)/col-WRKY15-DAP-Seq(GSE60143)/Homer	VGTTGACTWW	1e-49	-114.4	0	1602	0.1029	2275.8	0.0705
WRKY71(WRKY)/col-WRKY71-DAP-Seq(GSE60143)/Homer	CKTTGACYWW	1e-48	-112	0	1283	0.0824	1739	0.0538
Nr5a2(NR)/Pancreas-LRH1-ChIP-Seq(GSE34295)/Homer	BTCAAGGTCA	1e-47	-110.5	0	1675	0.1076	2420	0.0749
Atf7(bZIP)/3T3L1-Atf7-ChIP-Seq(GSE56872)/Homer	NGRTGACGTCAY	1e-47	-109.7	0	989	0.0635	1258.7	0.039
WRKY27(WRKY)/colamp-WRKY27-DAP-Seq(GSE60143)/Homer	NHGTTGACYTWD	1e-46	-107	0	1485	0.0954	2103.2	0.0651
WRKY29(WRKY)/colamp-WRKY29-DAP-Seq(GSE60143)/Homer	MGTTGACTTT	1e-43	-99.7	0	1674	0.1075	2466.4	0.0764
Hnf1(Homeobox)/Liver-Foxa2-Chip-Seq(GSE25694)/Homer	GGTTAAWCATTAA	1e-43	-99.35	0	328	0.0211	285.5	0.0088
Fli1(ETS)/CD8-FLI-ChIP-Seq(GSE20898)/Homer	NRYTTCCGGH	1e-42	-98.77	0	2449	0.1573	3873.3	0.1199
WRKY75(WRKY)/col-WRKY75-DAP-Seq(GSE60143)/Homer	CGTTGACTWW	1e-42	-98.22	0	1531	0.0984	2221.2	0.0688
ETV1(ETS)/GIST48-ETV1-ChIP-Seq(GSE22441)/Homer	AACCGGAAGT	1e-41	-94.58	0	2849	0.183	4643.8	0.1438
WRKY20(WRKY)/col-WRKY20-DAP-Seq(GSE60143)/Homer	CKTTGACYWD	1e-40	-93.07	0	1233	0.0792	1726.5	0.0534
FEA4(bZIP)/Corn-FEA4-ChIP-Seq(GSE61954)/Homer	TGACGTCACS	1e-40	-92.63	0	2151	0.1382	3361.3	0.1041
WRKY31(WRKY)/colamp-WRKY31-DAP-Seq(GSE60143)/Homer	NCGTTGACTWWK	1e-38	-89.43	0	1145	0.0736	1590.1	0.0492
Elk4(ETS)/Hela-Elk4-ChIP-Seq(GSE31477)/Homer	NRYTTCCGGY	1e-38	-88.87	0	1476	0.0948	2167.9	0.0671
Elk1(ETS)/Hela-Elk1-ChIP-Seq(GSE31477)/Homer	HACTTCCGGY	1e-38	-88	0	1468	0.0943	2157.3	0.0668
WRKY33(WRKY)/col-WRKY33-DAP-Seq(GSE60143)/Homer	CGTTGACYAW	1e-37	-86.94	0	1268	0.0815	1812.4	0.0561
HIF-1a(bHLH)/MCF7-HIF1a-ChIP-Seq(GSE28352)/Homer	TACGTGCV	1e-37	-86.01	0	738	0.0474	925.2	0.0286
ETV4(ETS)/HepG2-ETV4-ChIP-Seq(ENCODE)/Homer	ACCGGAAGTG	1e-36	-84.96	0	2486	0.1597	4026.8	0.1247
Nr5a2(NR)/mES-Nr5a2-ChIP-Seq(GSE19019)/Homer	BTCAAGGTCA	1e-36	-83.9	0	1308	0.084	1895.5	0.0587
ELF1(ETS)/Jurkat-ELF1-ChIP-Seq(SRA014231)/Homer	AVCCGGAAGT	1e-36	-83.26	0	1360	0.0874	1989.3	0.0616
ERG(ETS)/VCaP-ERG-ChIP-Seq(GSE14097)/Homer	ACAGGAAGTG	1e-35	-82.66	0	3013	0.1936	5034.3	0.1558
SF1(NR)/H295R-Nr5a1-ChIP-Seq(GSE44220)/Homer	CAAGGHCANV	1e-35	-82.54	0	1131	0.0727	1594.3	0.0494
At5g05790(MYBrelated)/col-At5g05790-DAP-Seq(GSE60143)/Homer	AYCTTATC	1e-35	-81.28	0	1361	0.0874	2001	0.0619
WRKY14(WRKY)/colamp-WRKY14-DAP-Seq(GSE60143)/Homer	NCGTTGACTTTN	1e-35	-80.62	0	815	0.0524	1068.4	0.0331
Sp2(Zf)/HEK293-Sp2.eGFP-ChIP-Seq(Encode)/Homer	YGGCCCCGCCCC	1e-34	-78.78	0	3427	0.2202	5855.5	0.1813
IBL1(bHLH)/Seedling-IBL1-ChIP-Seq(GSE51120)/Homer	CACGTGCC	1e-34	-78.67	0	4210	0.2705	7376.3	0.2283
KLF3(Zf)/MEF-Klf3-ChIP-Seq(GSE44748)/Homer	NRGCCCCRCCCHBNN	1e-33	-78.21	0	1470	0.0944	2208	0.0684
At3g11280(MYBrelated)/col-At3g11280-DAP-Seq(GSE60143)/Homer	GATAAGRT	1e-33	-77.14	0	1292	0.083	1898.6	0.0588
HAT2(Homeobox)/colamp-HAT2-DAP-Seq(GSE60143)/Homer	CYAATSATTR	1e-33	-76.98	0	1214	0.078	1762.9	0.0546
ATHB5(HB)/colamp-ATHB5-DAP-Seq(GSE60143)/Homer	AATGATTG	1e-32	-75.68	0	1296	0.0833	1912.5	0.0592
WRKY26(WRKY)/colamp-WRKY26-DAP-Seq(GSE60143)/Homer	CGTTGACTWDKN	1e-32	-75.08	0	884	0.0568	1203.9	0.0373
WRKY3(WRKY)/col-WRKY3-DAP-Seq(GSE60143)/Homer	NCKTTGACYDDN	1e-32	-75.01	0	1001	0.0643	1402.3	0.0434
Etv2(ETS)/ES-ER71-ChIP-Seq(GSE59402)/Homer(0.967)	NNAYTTCCTGHN	1e-32	-74.78	0	1812	0.1164	2844.6	0.0881
Zfp281(Zf)/ES-Zfp281-ChIP-Seq(GSE81042)/Homer	CCCCTCCCCCAC	1e-31	-71.97	0	641	0.0412	812.1	0.0251
NF-E2(bZIP)/K562-NFE2-ChIP-Seq(GSE31477)/Homer	GATGACTCAGCA	1e-31	-71.39	0	167	0.0107	120.9	0.0037
WRKY43(WRKY)/colamp-WRKY43-DAP-Seq(GSE60143)/Homer	NCGTTGACTTTT	1e-30	-71.05	0	592	0.038	736.3	0.0228
ATHB7(Homeobox)/col-ATHB7-DAP-Seq(GSE60143)/Homer	AATGATTG	1e-30	-70.85	0	1088	0.0699	1570.4	0.0486
Sp1(Zf)/Promoter/Homer	GGCCCCGCCCCC	1e-30	-69.73	0	1096	0.0704	1589.7	0.0492
KLF14(Zf)/HEK293-KLF14.GFP-ChIP-Seq(GSE58341)/Homer	RGKGGGCGKGGC	1e-29	-66.84	0	3888	0.2498	6851.3	0.2121
ETS(ETS)/Promoter/Homer	AACCGGAAGT	1e-28	-66.1	0	889	0.0571	1247.5	0.0386
GABPA(ETS)/Jurkat-GABPa-ChIP-Seq(GSE17954)/Homer	RACCGGAAGT	1e-28	-64.62	0	1891	0.1215	3052.2	0.0945
ATHB18(Homeobox)/colamp-ATHB18-DAP-Seq(GSE60143)/Homer	YCAATSATTG	1e-27	-63.74	0	278	0.0179	276.5	0.0086
PQM-1(?)/cElegans-L3-ChIP-Seq(modEncode)/Homer	ACTGATAAGA	1e-27	-62.88	0	602	0.0387	778.9	0.0241
AP-1(bZIP)/ThioMac-PU.1-ChIP-Seq(GSE21512)/Homer	VTGACTCATC	1e-26	-61.33	0	1156	0.0743	1735.3	0.0537
Atf2(bZIP)/3T3L1-Atf2-ChIP-Seq(GSE56872)/Homer	NRRTGACGTCAT	1e-26	-60.76	0	657	0.0422	876.9	0.0271
RAR:RXR(NR),DR5/ES-RAR-ChIP-Seq(GSE56893)/Homer	AGGTCAAGGTCA	1e-25	-59.29	0	516	0.0332	650.4	0.0201
ETS1(ETS)/Jurkat-ETS1-ChIP-Seq(GSE17954)/Homer	ACAGGAAGTG	1e-25	-58.65	0	2077	0.1334	3440.8	0.1065
NRF(NRF)/Promoter/Homer	STGCGCATGCGC	1e-25	-58.5	0	840	0.054	1195	0.037
ATHB20(Homeobox)/colamp-ATHB20-DAP-Seq(GSE60143)/Homer	CAATHATT	1e-25	-57.65	0	593	0.0381	781.9	0.0242
Stat3(Stat)/mES-Stat3-ChIP-Seq(GSE11431)/Homer	CTTCCGGGAA	1e-24	-56.94	0	971	0.0624	1430.5	0.0443
Fosl2(bZIP)/3T3L1-Fosl2-ChIP-Seq(GSE56872)/Homer	NATGASTCABNN	1e-24	-55.41	0	564	0.0362	741.1	0.0229
EWS:FLI1-fusion(ETS)/SK_N_MC-EWS:FLI1-ChIP-Seq(SRA014231)/Homer	VACAGGAAAT	1e-24	-55.39	0	1206	0.0775	1856.3	0.0575
c-Jun-CRE(bZIP)/K562-cJun-ChIP-Seq(GSE31477)/Homer	ATGACGTCATCY	1e-23	-54.95	0	560	0.036	736.7	0.0228
RORa(NR)/Liver-Rora-ChIP-Seq(GSE101115)/Homer	AAWCTAGGTCARDNN	1e-23	-54.53	0	290	0.0186	312.7	0.0097
MITF(bHLH)/MastCells-MITF-ChIP-Seq(GSE48085)/Homer	RTCATGTGAC	1e-23	-53.98	0	1749	0.1124	2860.3	0.0885
EWS:ERG-fusion(ETS)/CADO_ES1-EWS:ERG-ChIP-Seq(SRA014231)/Homer	ATTTCCTGTN	1e-23	-53.13	0	1220	0.0784	1894.1	0.0586
RORgt(NR)/EL4-RORgt.Flag-ChIP-Seq(GSE56019)/Homer	AAYTAGGTCA	1e-23	-53.05	0	266	0.0171	280.9	0.0087
RORgt(NR)/EL4-RORgt.Flag-ChIP-Seq(GSE56019)/Homer	AAYTAGGTCA	1e-23	-53.05	0	266	0.0171	280.9	0.0087
HAT1(Homeobox)/col-HAT1-DAP-Seq(GSE60143)/Homer	SCAATCATTGNN	1e-22	-52.85	0	278	0.0179	298.7	0.0092
Ets1-distal(ETS)/CD4+-PolII-ChIP-Seq(Barski_et_al.)/Homer	MACAGGAAGT	1e-22	-52.84	0	647	0.0416	889.5	0.0275
At5g08520(MYBrelated)/colamp-At5g08520-DAP-Seq(GSE60143)/Homer	ADBSTTATCY	1e-22	-51.56	0	1526	0.098	2463.1	0.0763
Nrf2(bZIP)/Lymphoblast-Nrf2-ChIP-Seq(GSE37589)/Homer	HTGCTGAGTCAT	1e-21	-50.57	0	144	0.0093	117.3	0.0036
STAT5(Stat)/mCD4+-Stat5-ChIP-Seq(GSE12346)/Homer	RTTTCTNAGAAA	1e-21	-50.23	0	645	0.0414	896.8	0.0278
Tgif2(Homeobox)/mES-Tgif2-ChIP-Seq(GSE55404)/Homer	TGTCANYT	1e-21	-49.79	0	5498	0.3532	10235.6	0.3169
At1g49010(MYBrelated)/col-At1g49010-DAP-Seq(GSE60143)/Homer	RGATAASNTT	1e-21	-48.57	0	2580	0.1658	4479.2	0.1387
THRb(NR)/HepG2-THRb.Flag-ChIP-Seq(Encode)/Homer	GGTCACCTGAGGTCA	1e-21	-48.47	0	1116	0.0717	1733.1	0.0537
FHY3(FAR1)/Arabidopsis-FHY3-ChIP-Seq(GSE30711)/Homer	HHCACGCGCBTN	1e-20	-48.29	0	952	0.0612	1440.4	0.0446
ATHB6(Homeobox)/Arabidopsis-HB6-ChIP-Seq(GSE80564)/Homer	CAATNATTBN	1e-20	-48.24	0	976	0.0627	1483.1	0.0459
JunB(bZIP)/DendriticCells-Junb-ChIP-Seq(GSE36099)/Homer	RATGASTCAT	1e-20	-48.09	0	873	0.0561	1301.4	0.0403
LEF1(HMG)/H1-LEF1-ChIP-Seq(GSE64758)/Homer	CCTTTGATST	1e-20	-47.68	0	1200	0.0771	1890.3	0.0585
USF1(bHLH)/GM12878-Usf1-ChIP-Seq(GSE32465)/Homer	SGTCACGTGR	1e-20	-47.45	0	1025	0.0659	1575.4	0.0488
WRKY40(WRKY)/colamp-WRKY40-DAP-Seq(GSE60143)/Homer	AHWAGTCAAC	1e-20	-47.38	0	915	0.0588	1379	0.0427
Klf9(Zf)/GBM-Klf9-ChIP-Seq(GSE62211)/Homer	GCCACRCCCACY	1e-20	-47.11	0	1121	0.072	1751	0.0542
HIC1(Zf)/Treg-ZBTB29-ChIP-Seq(GSE99889)/Homer	TGCCAGCB	1e-20	-46.19	0	4118	0.2646	7515.1	0.2326
Atf3(bZIP)/GBM-ATF3-ChIP-Seq(GSE33912)/Homer	DATGASTCATHN	1e-19	-45.71	0	1024	0.0658	1583.6	0.049
Tcf4(HMG)/Hct116-Tcf4-ChIP-Seq(SRA012054)/Homer	ASATCAAAGGVA	1e-19	-45.64	0	832	0.0535	1241.9	0.0384
THRa(NR)/C17.2-THRa-ChIP-Seq(GSE38347)/Homer	GGTCANYTGAGGWCA	1e-19	-45.55	0	788	0.0506	1164.4	0.036
Elf4(ETS)/BMDM-Elf4-ChIP-Seq(GSE88699)/Homer	ACTTCCKGKT	1e-19	-45.34	0	1978	0.1271	3356	0.1039
NRF1(NRF)/MCF7-NRF1-ChIP-Seq(Unpublished)/Homer	CTGCGCATGCGC	1e-19	-45.28	0	684	0.0439	984.4	0.0305
At5g58900(MYBrelated)/colamp-At5g58900-DAP-Seq(GSE60143)/Homer	WWWTYTTATCTWWWW	1e-19	-44.71	0	1951	0.1253	3311	0.1025
Fra2(bZIP)/Striatum-Fra2-ChIP-Seq(GSE43429)/Homer	GGATGACTCATC	1e-19	-44.5	0	752	0.0483	1106.9	0.0343
WRKY65(WRKY)/colamp-WRKY65-DAP-Seq(GSE60143)/Homer	AWWWAGTCAACG	1e-19	-44.3	0	728	0.0468	1065.4	0.033
Meis1(Homeobox)/MastCells-Meis1-ChIP-Seq(GSE48085)/Homer	VGCTGWCAVB	1e-19	-43.88	0	3055	0.1963	5446.3	0.1686
Cbf1(bHLH)/Yeast-Cbf1-ChIP-Seq(GSE29506)/Homer	TCACGTGAYH	1e-18	-43.2	0	641	0.0412	919.1	0.0285
Tcf3(HMG)/mES-Tcf3-ChIP-Seq(GSE11724)/Homer	ASWTCAAAGG	1e-18	-42.9	0	532	0.0342	734.8	0.0227
Fra1(bZIP)/BT549-Fra1-ChIP-Seq(GSE46166)/Homer	NNATGASTCATH	1e-18	-42.88	0	860	0.0553	1305.9	0.0404
Bach2(bZIP)/OCILy7-Bach2-ChIP-Seq(GSE44420)/Homer	TGCTGAGTCA	1e-18	-42.56	0	376	0.0242	477.5	0.0148
BATF(bZIP)/Th17-BATF-ChIP-Seq(GSE39756)/Homer	DATGASTCAT	1e-18	-42.45	0	1019	0.0655	1593.5	0.0493
SeqBias: CG bias	SSSSSSSSSS	1e-18	-42.44	0	12797	0.8222	25644.1	0.7939
ATHB25(ZFHD)/colamp-ATHB25-DAP-Seq(GSE60143)/Homer	TAATTAVB	1e-18	-41.96	0	1580	0.1015	2633	0.0815
ATHB15(HB)/col-ATHB15-DAP-Seq(GSE60143)/Homer	GYAATSATTA	1e-18	-41.55	0	458	0.0294	615	0.019
BIM1(bHLH)/colamp-BIM1-DAP-Seq(GSE60143)/Homer	NNNNNNVTCACGTGM	1e-18	-41.54	0	312	0.02	378.5	0.0117
RAR:RXR(NR),DR5/ES-RAR-ChIP-Seq(GSE56893)/Homer	RGGTCADNNAGAGGTCAV	1e-17	-40.72	0	94	0.006	68.1	0.0021
Usf2(bHLH)/C2C12-Usf2-ChIP-Seq(GSE36030)/Homer	GTCACGTGGT	1e-17	-40.41	0	679	0.0436	998.5	0.0309
TGA6(bZIP)/colamp-TGA6-DAP-Seq(GSE60143)/Homer	TGACGTCABC	1e-17	-39.74	0	1016	0.0653	1604.3	0.0497
STAT4(Stat)/CD4-Stat4-ChIP-Seq(GSE22104)/Homer	NYTTCCWGGAAR	1e-17	-39.59	0	1478	0.095	2459	0.0761
AT5G47660(Trihelix)/colamp-AT5G47660-DAP-Seq(GSE60143)/Homer	AWTTTTACCG	1e-16	-38.9	0	1961	0.126	3379.5	0.1046
SUT1?/SacCer-Promoters/Homer	CCCCGCGC	1e-16	-38.58	0	10246	0.6583	20213.2	0.6257
TGA1(bZIP)/colamp-TGA1-DAP-Seq(GSE60143)/Homer	TGACGTCAKC	1e-16	-38.56	0	717	0.0461	1074.8	0.0333
SPCH(bHLH)/Seedling-SPCH-ChIP-Seq(GSE57497)/Homer	WNBCACGTGA	1e-16	-37.89	0	2187	0.1405	3822.8	0.1183
STAT1(Stat)/HelaS3-STAT1-ChIP-Seq(GSE12782)/Homer	NATTTCCNGGAAAT	1e-16	-37.81	0	522	0.0335	738.9	0.0229
WRKY22(WRKY)/colamp-WRKY22-DAP-Seq(GSE60143)/Homer	WWAAAGTCAACK	1e-16	-37.49	0	881	0.0566	1373.5	0.0425
WRKY45(WRKY)/col-WRKY45-DAP-Seq(GSE60143)/Homer	HNNNKTTGACTWWNH	1e-16	-37.08	0	577	0.0371	836.2	0.0259
RORg(NR)/Liver-Rorc-ChIP-Seq(GSE101115)/Homer	WAABTAGGTCAV	1e-15	-36.33	0	195	0.0125	212.8	0.0066
CLOCK(bHLH)/Liver-Clock-ChIP-Seq(GSE39860)/Homer	GHCACGTG	1e-15	-36.24	0	1239	0.0796	2038	0.0631
Jun-AP1(bZIP)/K562-cJun-ChIP-Seq(GSE31477)/Homer	GATGASTCATCN	1e-15	-35.64	0	401	0.0258	542.3	0.0168
SeqBias: A/T bias	WWWWWWWWWW	1e-15	-35.57	0	12128	0.7792	24277.3	0.7516
NFE2L2(bZIP)/HepG2-NFE2L2-ChIP-Seq(Encode)/Homer	AWWWTGCTGAGTCAT	1e-15	-35.47	0	158	0.0102	160.4	0.005
BMYB(HTH)/Hela-BMYB-ChIP-Seq(GSE27030)/Homer	NHAACBGYYV	1e-15	-35.32	0	2620	0.1683	4688.7	0.1452
ATHB23(ZFHD)/col-ATHB23-DAP-Seq(GSE60143)/Homer	HTAATTARNN	1e-15	-35.25	0	1234	0.0793	2036.1	0.063
VDR(NR),DR3/GM10855-VDR+vitD-ChIP-Seq(GSE22484)/Homer	ARAGGTCANWGAGTTCANNN	1e-15	-34.93	0	397	0.0255	538.7	0.0167
Bach1(bZIP)/K562-Bach1-ChIP-Seq(GSE31477)/Homer	AWWNTGCTGAGTCAT	1e-15	-34.66	0	137	0.0088	132.2	0.0041
MYB116(MYB)/colamp-MYB116-DAP-Seq(GSE60143)/Homer	AGTTAGGCAN	1e-14	-33.99	0	1050	0.0675	1704.3	0.0528
Stat3+il21(Stat)/CD4-Stat3-ChIP-Seq(GSE19198)/Homer	SVYTTCCNGGAARB	1e-14	-33.37	0	1221	0.0784	2026.6	0.0627
ATHB6(Homeobox)/col-ATHB6-DAP-Seq(GSE60143)/Homer	AATGATTG	1e-14	-33.32	0	1568	0.1007	2680.4	0.083
bZIP50(bZIP)/colamp-bZIP50-DAP-Seq(GSE60143)/Homer	GATGACGTCA	1e-14	-33.08	0	1630	0.1047	2801	0.0867
Maz(Zf)/HepG2-Maz-ChIP-Seq(GSE31477)/Homer	GGGGGGGG	1e-14	-33.01	0	2840	0.1825	5145.8	0.1593
GRE(NR),IR3/RAW264.7-GRE-ChIP-Seq(Unpublished)/Homer	VAGRACAKWCTGTYC	1e-14	-32.73	0	445	0.0286	628.5	0.0195
bHLHE40(bHLH)/HepG2-BHLHE40-ChIP-Seq(GSE31477)/Homer	KCACGTGMCN	1e-14	-32.43	0	784	0.0504	1228.5	0.038
FUS3(ABI3VP1)/col-FUS3-DAP-Seq(GSE60143)/Homer	DNNWTNTGCATGKNN	1e-13	-31.42	0	1898	0.1219	3329.5	0.1031
SPDEF(ETS)/VCaP-SPDEF-ChIP-Seq(SRA014231)/Homer	ASWTCCTGBT	1e-13	-30.41	0	1859	0.1194	3264.6	0.1011
EHF(ETS)/LoVo-EHF-ChIP-Seq(GSE49402)/Homer	AVCAGGAAGT	1e-13	-30.26	0	2228	0.1431	3980.2	0.1232
AMYB(HTH)/Testes-AMYB-ChIP-Seq(GSE44588)/Homer	TGGCAGTTGG	1e-13	-30.19	0	2721	0.1748	4945.6	0.1531
GTL1(Trihelix)/colamp-GTL1-DAP-Seq(GSE60143)/Homer	WWTTTACCKY	1e-12	-29.88	0	1474	0.0947	2532.9	0.0784
MYB70(MYB)/col-MYB70-DAP-Seq(GSE60143)/Homer	WTAACNGTTA	1e-12	-28.88	0	2258	0.1451	4054.8	0.1255
PAX5(Paired,Homeobox),condensed/GM12878-PAX5-ChIP-Seq(GSE32465)/Homer	GTCACGCTCSCTGM	1e-12	-28.81	0	254	0.0163	324.4	0.01
WRKY8(WRKY)/colamp-WRKY8-DAP-Seq(GSE60143)/Homer	CGTTGACTTT	1e-12	-27.74	0	189	0.0121	224.3	0.0069
PGR(NR)/EndoStromal-PGR-ChIP-Seq(GSE69539)/Homer	AAGAACATWHTGTTC	1e-12	-27.64	0	411	0.0264	592.4	0.0183
PHV(HB)/col-PHV-DAP-Seq(GSE60143)/Homer	RTAATSATTA	1e-12	-27.63	0	527	0.0339	795.9	0.0246
Bcl11a(Zf)/HSPC-BCL11A-ChIP-Seq(GSE104676)/Homer	TYTGACCASWRG	1e-11	-27.59	0	1149	0.0738	1937.7	0.06
KLF6(Zf)/PDAC-KLF6-ChIP-Seq(GSE64557)/Homer	MKGGGYGTGGCC	1e-11	-27.43	0	2321	0.1491	4194.9	0.1299
GRE(NR),IR3/A549-GR-ChIP-Seq(GSE32465)/Homer	NRGVACABNVTGTYCY	1e-11	-27.12	0	275	0.0177	364.4	0.0113
TBP3(MYBrelated)/col-TBP3-DAP-Seq(GSE60143)/Homer	VYTAGGGCAN	1e-11	-27.03	0	1292	0.083	2212	0.0685
WRKY42(WRKY)/colamp-WRKY42-DAP-Seq(GSE60143)/Homer	NAAAGTCAACGN	1e-11	-26.74	0	544	0.035	830.5	0.0257
KLF5(Zf)/LoVo-KLF5-ChIP-Seq(GSE49402)/Homer	DGGGYGKGGC	1e-11	-26.58	0	2913	0.1872	5370.4	0.1663
MYB57(MYB)/col-MYB57-DAP-Seq(GSE60143)/Homer	TTACCTAACT	1e-11	-26.38	0	669	0.043	1057.1	0.0327
MYB(HTH)/ERMYB-Myb-ChIPSeq(GSE22095)/Homer	GGCVGTTR	1e-11	-26.27	0	3104	0.1994	5753	0.1781
WRKY11(WRKY)/col-WRKY11-DAP-Seq(GSE60143)/Homer	SCGTTGACTTTN	1e-11	-25.89	0	194	0.0125	237.2	0.0073
TFE3(bHLH)/MEF-TFE3-ChIP-Seq(GSE75757)/Homer	GTCACGTGACYV	1e-11	-25.67	0	223	0.0143	284.1	0.0088
TEAD4(TEA)/Tropoblast-Tead4-ChIP-Seq(GSE37350)/Homer	CCWGGAATGY	1e-11	-25.53	0	1229	0.079	2106.5	0.0652
AT2G15740(C2H2)/col-AT2G15740-DAP-Seq(GSE60143)/Homer	DHNDWATCGATD	1e-11	-25.48	0	1079	0.0693	1823.1	0.0564
ATHB33(ZFHD)/col-ATHB33-DAP-Seq(GSE60143)/Homer	NGTRATTAAK	1e-11	-25.42	0	1762	0.1132	3129.5	0.0969
bHLH74(bHLH)/col-bHLH74-DAP-Seq(GSE60143)/Homer	DRATCACGTGAB	1e-10	-24.59	0	585	0.0376	916.5	0.0284
ANAC094(NAC)/col-ANAC094-DAP-Seq(GSE60143)/Homer	DVCGTRNNNNNYACG	1e-10	-24.54	0	668	0.0429	1067.9	0.0331
PIF5ox(bHLH)/Arabidopsis-PIF5ox-ChIP-Seq(GSE35062)/Homer	BCACGTGVDN	1e-10	-24.51	0	2014	0.1294	3629.8	0.1124
Tcf7(HMG)/GM12878-TCF7-ChIP-Seq(Encode)/Homer	CTTTGATGTGSB	1e-10	-24.34	0	593	0.0381	933	0.0289
O2(bZIP)/Corn-O2-ChIP-Seq(GSE63991)/Homer	GCTGACGTGGCA	1e-10	-23.91	0	307	0.0197	430.6	0.0133
ATHB34(ZFHD)/colamp-ATHB34-DAP-Seq(GSE60143)/Homer	TRATTARS	1e-10	-23.8	0	1047	0.0673	1777.8	0.055
TCFL2(HMG)/K562-TCF7L2-ChIP-Seq(GSE29196)/Homer	ACWTCAAAGG	1e-10	-23.49	0	192	0.0123	241.9	0.0075
bZIP52(bZIP)/colamp-bZIP52-DAP-Seq(GSE60143)/Homer	NDNHCAGCTGTCANN	1e-10	-23.27	0	2234	0.1435	4075.9	0.1262
BIM3(bHLH)/col-BIM3-DAP-Seq(GSE60143)/Homer	TWVTCACGTGAB	1e-10	-23.26	0	334	0.0215	479.5	0.0148
MYB81(MYB)/col-MYB81-DAP-Seq(GSE60143)/Homer	NWAACSGWTWNN	1e-10	-23.07	0	2251	0.1446	4111.8	0.1273
HIF2a(bHLH)/785_O-HIF2a-ChIP-Seq(GSE34871)/Homer	GCACGTACCC	1e-10	-23.04	0	812	0.0522	1343.5	0.0416
E-box/Drosophila-Promoters/Homer	AACAGCTGTTHN	1e-09	-22.95	0	418	0.0269	627.3	0.0194
CUC2(NAC)/colamp-CUC2-DAP-Seq(GSE60143)/Homer	TRCKTGTNNNWCAMG	1e-09	-22.84	0	512	0.0329	795.4	0.0246
BIM2(bHLH)/col-BIM2-DAP-Seq(GSE60143)/Homer	NNNNCACGTGNN	1e-09	-22.75	0	1712	0.11	3062.3	0.0948
WRKY47(WRKY)/colamp-WRKY47-DAP-Seq(GSE60143)/Homer	WAAGTCAACGBT	1e-09	-22.66	0	399	0.0256	595.9	0.0184
GT2(Trihelix)/colamp-GT2-DAP-Seq(GSE60143)/Homer	AMGGTAAAWWWN	1e-09	-22.38	0	1376	0.0884	2417.1	0.0748
Klf4(Zf)/mES-Klf4-ChIP-Seq(GSE11431)/Homer	GCCACACCCA	1e-09	-22.34	0	891	0.0572	1496.9	0.0463
LXRE(NR),DR4/RAW-LXRb.biotin-ChIP-Seq(GSE21512)/Homer	RGGTTACTANAGGTCA	1e-09	-22.21	0	104	0.0067	109.2	0.0034
ZNF416(Zf)/HEK293-ZNF416.GFP-ChIP-Seq(GSE58341)/Homer	WDNCTGGGCA	1e-09	-22.13	0	2291	0.1472	4202.3	0.1301
ATHB24(ZFHD)/colamp-ATHB24-DAP-Seq(GSE60143)/Homer	TAATTAAS	1e-09	-22.11	0	974	0.0626	1654.5	0.0512
ANAC016(NAC)/col-ANAC016-DAP-Seq(GSE60143)/Homer	WNCTTGNNNNNCAMG	1e-09	-21.94	0	1227	0.0788	2136.7	0.0661
ANAC087(NAC)/col-ANAC087-DAP-Seq(GSE60143)/Homer	WVCKTGHNNNWCAMG	1e-09	-21.88	0	476	0.0306	736.9	0.0228
bHLH34(bHLH)/colamp-bHLH34-DAP-Seq(GSE60143)/Homer	HGWGRHWGACACGTG	1e-09	-21.61	0	613	0.0394	986.8	0.0305
ANAC057(NAC)/colamp-ANAC057-DAP-Seq(GSE60143)/Homer	DVCKTGNNNNNCAMG	1e-09	-21.51	0	1060	0.0681	1822.7	0.0564
SeqBias: polyA-repeat	AAAAAAAAAA	1e-09	-21.38	0	15109	0.9707	31063.2	0.9616
Egr1(Zf)/K562-Egr1-ChIP-Seq(GSE32465)/Homer	TGCGTGGGYG	1e-09	-21.11	0	1591	0.1022	2846.2	0.0881
AT5G56840(MYBrelated)/colamp-AT5G56840-DAP-Seq(GSE60143)/Homer	TGGATAAGGT	1e-09	-20.75	0	1611	0.1035	2889.2	0.0894
PAX5(Paired,Homeobox)/GM12878-PAX5-ChIP-Seq(GSE32465)/Homer	GCAGCCAAGCRTGACH	1e-08	-20.55	0	749	0.0481	1245.4	0.0386
GATA20(C2C2gata)/colamp-GATA20-DAP-Seq(GSE60143)/Homer	TNGATCNDNM	1e-08	-20.51	0	3182	0.2044	5995.9	0.1856
E-box(bHLH)/Promoter/Homer	SSGGTCACGTGA	1e-08	-20.23	0	220	0.0141	298.1	0.0092
Srebp2(bHLH)/HepG2-Srebp2-ChIP-Seq(GSE31477)/Homer	CGGTCACSCCAC	1e-08	-20.03	0	261	0.0168	368	0.0114
FAR1(FAR1)/col-FAR1-DAP-Seq(GSE60143)/Homer	TKNNNYYCACGCGCY	1e-08	-19.63	0	360	0.0231	542.5	0.0168
ATHB13(Homeobox)/col-ATHB13-DAP-Seq(GSE60143)/Homer	CAATAATT	1e-08	-19.42	0	1289	0.0828	2281.7	0.0706
BOS1(MYB)/col-BOS1-DAP-Seq(GSE60143)/Homer	NNRCCTAACT	1e-08	-19.21	0	1397	0.0898	2492.8	0.0772
WT1(Zf)/Kidney-WT1-ChIP-Seq(GSE90016)/Homer	MCTCCCMCRCAB	1e-08	-19.16	0	1157	0.0743	2030.2	0.0628
PBX2(Homeobox)/K562-PBX2-ChIP-Seq(Encode)/Homer	RTGATTKATRGN	1e-08	-18.98	0	1132	0.0727	1985	0.0614
CRE(bZIP)/Promoter/Homer	CSGTGACGTCAC	1e-08	-18.61	0	545	0.035	882.4	0.0273
ANAC092(NAC)/colamp-ANAC092-DAP-Seq(GSE60143)/Homer	WRCKTGWNNNWCAMG	1e-08	-18.51	0	600	0.0385	984.4	0.0305
Pax7(Paired,Homeobox)/Myoblast-Pax7-ChIP-Seq(GSE25064)/Homer	TAATCAATTA	1e-08	-18.42	0	151	0.0097	191.2	0.0059
TGA4(bZIP)/colamp-TGA4-DAP-Seq(GSE60143)/Homer	RTGACGTCAKCW	1e-07	-18.34	0	491	0.0315	785.9	0.0243
EMB1789(C3H)/col-EMB1789-DAP-Seq(GSE60143)/Homer	TWTTTACCGYND	1e-07	-18.28	0	505	0.0324	812	0.0251
Lhx3(Homeobox)/Neuron-Lhx3-ChIP-Seq(GSE31456)/Homer	ADBTAATTAR	1e-07	-17.99	0	2286	0.1469	4251.8	0.1316
Ronin(THAP)/ES-Thap11-ChIP-Seq(GSE51522)/Homer	RACTACAACTCCCAGVAKGC	1e-07	-17.39	0	115	0.0074	137.5	0.0043
MYB65(MYB)/colamp-MYB65-DAP-Seq(GSE60143)/Homer	RACNGTTA	1e-07	-17.23	0	1723	0.1107	3152.1	0.0976
c-Myc(bHLH)/LNCAP-cMyc-ChIP-Seq(Unpublished)/Homer	VCCACGTG	1e-07	-17.12	0	1170	0.0752	2077.8	0.0643
CUC3(NAC)/col-CUC3-DAP-Seq(GSE60143)/Homer	TRCKTGWNNNACAMG	1e-07	-17.11	0	493	0.0317	797.7	0.0247
AT3G25990(Trihelix)/colamp-AT3G25990-DAP-Seq(GSE60143)/Homer	TTAACCATAG	1e-07	-17.04	0	979	0.0629	1711.5	0.053
SeqBias: G/A bias	RRRRRRRRRR	1e-07	-16.99	0	15554	0.9993	32218.8	0.9974
At3g60580(C2H2)/col-At3g60580-DAP-Seq(GSE60143)/Homer	WTTYTACT	1e-07	-16.95	0	8137	0.5228	16193.6	0.5013
VIP1(bZIP)/col-VIP1-DAP-Seq(GSE60143)/Homer	NTTGACAGCTGTCAN	1e-07	-16.78	0	313	0.0201	474.4	0.0147
ELF5(ETS)/T47D-ELF5-ChIP-Seq(GSE30407)/Homer	ACVAGGAAGT	1e-07	-16.64	0	1283	0.0824	2301.4	0.0712
At4g36780(BZR)/col-At4g36780-DAP-Seq(GSE60143)/Homer	NNNNNNCACGTGNNN	1e-07	-16.64	0	687	0.0441	1161.5	0.036
Foxh1(Forkhead)/hESC-FOXH1-ChIP-Seq(GSE29422)/Homer	NNTGTGGATTSS	1e-07	-16.44	0	923	0.0593	1610.9	0.0499
WRKY21(WRKY)/colamp-WRKY21-DAP-Seq(GSE60143)/Homer	DCGTTGACTTTT	1e-06	-16.06	0	159	0.0102	212.4	0.0066
CEBP:CEBP(bZIP)/MEF-Chop-ChIP-Seq(GSE35681)/Homer	NTNATGCAAYMNNHTGMAAY	1e-06	-15.72	0	222	0.0143	320.1	0.0099
PIF4(bHLH)/Seedling-PIF4-ChIP-Seq(GSE35315)/Homer	NNBCACGTGN	1e-06	-15.35	0	2358	0.1515	4436.8	0.1374
BPC6(BBRBPC)/col-BPC6-DAP-Seq(GSE60143)/Homer	YTYTCTCTCTCTCTA	1e-06	-15.33	0	193	0.0124	272.1	0.0084
MafK(bZIP)/C2C12-MafK-ChIP-Seq(GSE36030)/Homer	GCTGASTCAGCA	1e-06	-15.28	0	408	0.0262	654.2	0.0203
AtHB32(ZFHD)/col200-AtHB32-DAP-Seq(GSE60143)/Homer	CGAATTAT	1e-06	-15.08	0	1343	0.0863	2437.9	0.0755
AT1G20910(ARID)/col-AT1G20910-DAP-Seq(GSE60143)/Homer	THAATTRAWN	1e-06	-14.85	0	2054	0.132	3840.2	0.1189
GATA15(C2C2gata)/col-GATA15-DAP-Seq(GSE60143)/Homer	KATGATCA	1e-06	-14.81	0	2035	0.1307	3803.6	0.1178
ELT-3(Gata)/cElegans-L1-ELT3-ChIP-Seq(modEncode)/Homer	AWTGATAAGA	1e-06	-14.54	0	580	0.0373	978.8	0.0303
ANAC083(NAC)/col-ANAC083-DAP-Seq(GSE60143)/Homer	CKTRWNNNWYAMGTA	1e-06	-14.29	0	944	0.0606	1673.6	0.0518
Tgif1(Homeobox)/mES-Tgif1-ChIP-Seq(GSE55404)/Homer	YTGWCADY	1e-06	-14.27	0	4857	0.312	9504.3	0.2942
ANAC045(NAC)/col-ANAC045-DAP-Seq(GSE60143)/Homer	DNCKTVNNNNNNAMG	1e-06	-14.26	0	2931	0.1883	5602.1	0.1734
bZIP69(bZIP)/col-bZIP69-DAP-Seq(GSE60143)/Homer	GACAGCTGKCAW	1e-06	-14.16	0	208	0.0134	303.8	0.0094
TGA5(bZIP)/col-TGA5-DAP-Seq(GSE60143)/Homer	NNGATGACGTCATCN	1e-06	-14.11	0	194	0.0125	280	0.0087
ABF1/SacCer-Promoters/Homer	CGTRNAAARTGA	1e-06	-14.09	0	421	0.027	686.1	0.0212
Hoxb4(Homeobox)/ES-Hoxb4-ChIP-Seq(GSE34014)/Homer	TGATTRATGGCY	1e-06	-14.04	0	282	0.0181	434.3	0.0134
HAT5(Homeobox)/colamp-HAT5-DAP-Seq(GSE60143)/Homer	DCAATWATTG	1e-06	-13.96	0	162	0.0104	226	0.007
JunD(bZIP)/K562-JunD-ChIP-Seq/Homer	ATGACGTCATCN	1e-06	-13.89	0	194	0.0125	280.1	0.0087
ELF3(ETS)/PDAC-ELF3-ChIP-Seq(GSE64557)/Homer	ANCAGGAAGT	1e-06	-13.88	0	1196	0.0768	2166.9	0.0671
AR-halfsite(NR)/LNCaP-AR-ChIP-Seq(GSE27824)/Homer	CCAGGAACAG	1e-06	-13.82	0	6740	0.433	13379.7	0.4142
bZIP18(bZIP)/colamp-bZIP18-DAP-Seq(GSE60143)/Homer	KGMCAGCTND	1e-05	-13.74	0	9189	0.5904	18463.8	0.5716
CAMTA1(CAMTA)/col-CAMTA1-DAP-Seq(GSE60143)/Homer	WWAACGCGTT	1e-05	-13.61	0	998	0.0641	1785.5	0.0553
Pdx1(Homeobox)/Islet-Pdx1-ChIP-Seq(SRA008281)/Homer	YCATYAATCA	1e-05	-13.52	0	1209	0.0777	2196.1	0.068
MYB119(MYB)/colamp-MYB119-DAP-Seq(GSE60143)/Homer	YRACCGTTACDD	1e-05	-13.17	0	426	0.0274	702.5	0.0217
NFkB-p65-Rel(RHD)/ThioMac-LPS-Expression(GSE23622)/Homer	GGAAATTCCC	1e-05	-13.16	0	89	0.0057	108.7	0.0034
Brachyury(T-box)/Mesoendoderm-Brachyury-ChIP-exo(GSE54963)/Homer	ANTTMRCASBNNNGTGYKAAN	1e-05	-12.74	0	435	0.0279	722.4	0.0224
GATA:SCL(Zf,bHLH)/Ter119-SCL-ChIP-Seq(GSE18720)/Homer	CRGCTGBNGNSNNSAGATAA	1e-05	-12.71	0	177	0.0114	256.7	0.0079
Pax7(Paired,Homeobox),long/Myoblast-Pax7-ChIP-Seq(GSE25064)/Homer	TAATCHGATTAC	1e-05	-12.62	0	27	0.0017	21	0.0006
MYB73(MYB)/col-MYB73-DAP-Seq(GSE60143)/Homer	NNNNHAACNGHHDHN	1e-05	-12.61	0	2867	0.1842	5506.6	0.1705
GFY(?)/Promoter/Homer	ACTACAATTCCC	1e-05	-12.56	0	148	0.0095	207	0.0064
MYB77(MYB)/col-MYB77-DAP-Seq(GSE60143)/Homer	NYAACBGYMC	1e-05	-12.44	0	2190	0.1407	4152.6	0.1286
MYB101(MYB)/colamp-MYB101-DAP-Seq(GSE60143)/Homer	TAACNRMY	1e-05	-12.21	0	3105	0.1995	5994.9	0.1856
Gfi1b(Zf)/HPC7-Gfi1b-ChIP-Seq(GSE22178)/Homer	MAATCACTGC	1e-05	-12.16	0	992	0.0637	1791.4	0.0555
GFX(?)/Promoter/Homer	ATTCTCGCGAGA	1e-05	-12.15	0	39	0.0025	36.9	0.0011
SPL11(SBP)/col100-SPL11-DAP-Seq(GSE60143)/Homer	YTGTACTTBH	1e-05	-12.05	0	914	0.0587	1641.9	0.0508
ANAC050(NAC)/colamp-ANAC050-DAP-Seq(GSE60143)/Homer	WNCTTGNNNNNCAAG	1e-05	-11.88	0	796	0.0511	1415.1	0.0438
Egr2(Zf)/Thymocytes-Egr2-ChIP-Seq(GSE34254)/Homer	NGCGTGGGCGGR	1e-05	-11.82	0	453	0.0291	763.9	0.0236
MYB41(MYB)/col-MYB41-DAP-Seq(GSE60143)/Homer	BYTYACCTAA	1e-05	-11.81	0	494	0.0317	840.3	0.026
ARE(NR)/LNCAP-AR-ChIP-Seq(GSE27824)/Homer	RGRACASNSTGTYCYB	1e-05	-11.7	0	494	0.0317	842	0.0261
CUC1(NAC)/col-CUC1-DAP-Seq(GSE60143)/Homer	TACTTGTNNNACAAG	0.0001	-11.41	0	595	0.0382	1035.8	0.0321
BMAL1(bHLH)/Liver-Bmal1-ChIP-Seq(GSE39860)/Homer	GNCACGTG	0.0001	-11.25	0	3389	0.2177	6590.4	0.204
E2FA(E2FDP)/colamp-E2FA-DAP-Seq(GSE60143)/Homer	WWTGGCGCCAWWWNN	0.0001	-11.23	0	708	0.0455	1253.8	0.0388
HLH-1(bHLH)/cElegans-Embryo-HLH1-ChIP-Seq(modEncode)/Homer	RACAGCTGTTBH	0.0001	-11.08	0	1260	0.081	2330.5	0.0721
STAT6(Stat)/Macrophage-Stat6-ChIP-Seq(GSE38377)/Homer	TTCCKNAGAA	0.0001	-11.02	0.0001	725	0.0466	1288.3	0.0399
AT5G61620(MYBrelated)/colamp-AT5G61620-DAP-Seq(GSE60143)/Homer	CTTATCCA	0.0001	-11.02	0.0001	1821	0.117	3442.9	0.1066
LBD23(LOBAS2)/colamp-LBD23-DAP-Seq(GSE60143)/Homer	GCGNAWWWTNCGCYW	0.0001	-10.77	0.0001	1600	0.1028	3007.5	0.0931
ZNF467(Zf)/HEK293-ZNF467.GFP-ChIP-Seq(GSE58341)/Homer	TGGGGAAGGGCM	0.0001	-10.62	0.0001	1459	0.0937	2730	0.0845
MafA(bZIP)/Islet-MafA-ChIP-Seq(GSE30298)/Homer	TGCTGACTCA	0.0001	-10.5	0.0001	1364	0.0876	2544.7	0.0788
Replumless(BLH)/Arabidopsis-RPL.GFP-ChIP-Seq(GSE78727)/Homer	HGTCWHATCA	0.0001	-10.48	0.0001	1531	0.0984	2875.9	0.089
MYB98(MYB)/col-MYB98-DAP-Seq(GSE60143)/Homer	NWDCCGTTAC	0.0001	-10.34	0.0001	401	0.0258	678.1	0.021
ERE(NR),IR3/MCF7-ERa-ChIP-Seq(Unpublished)/Homer	VAGGTCACNSTGACC	0.0001	-10.33	0.0001	462	0.0297	793.3	0.0246
AT1G72740(MYBrelated)/colamp-AT1G72740-DAP-Seq(GSE60143)/Homer	NNWWAMCCTAAHWNN	0.0001	-10.2	0.0001	1514	0.0973	2846.4	0.0881
Nkx6.1(Homeobox)/Islet-Nkx6.1-ChIP-Seq(GSE40975)/Homer	GKTAATGR	0.0001	-10.2	0.0001	3448	0.2215	6735.1	0.2085
ATHB21(HB)/colamp-ATHB21-DAP-Seq(GSE60143)/Homer	YCAATWAT	0.0001	-10.12	0.0001	575	0.0369	1010.7	0.0313
Srebp1a(bHLH)/HepG2-Srebp1a-ChIP-Seq(GSE31477)/Homer	RTCACSCCAY	0.0001	-9.978	0.0001	319	0.0205	528.6	0.0164
VND4(NAC)/colamp-VND4-DAP-Seq(GSE60143)/Homer	WRCTTGWANWWCAAG	0.0001	-9.936	0.0001	937	0.0602	1713.3	0.053
VND6(NAC)/col-VND6-DAP-Seq(GSE60143)/Homer	DCTTNHTTTTYAMGY	0.0001	-9.735	0.0002	1458	0.0937	2743.9	0.0849
MafB(bZIP)/BMM-Mafb-ChIP-Seq(GSE75722)/Homer	WNTGCTGASTCAGCANWTTY	0.0001	-9.681	0.0002	648	0.0416	1155.3	0.0358
SND2(NAC)/colamp-SND2-DAP-Seq(GSE60143)/Homer	CTTVWNNNWBAAGNW	0.0001	-9.613	0.0002	719	0.0462	1294	0.0401
TGA9(bZIP)/colamp-TGA9-DAP-Seq(GSE60143)/Homer	VTGACGTC	0.0001	-9.589	0.0002	1734	0.1114	3295.4	0.102
ANAC020(NAC)/col-ANAC020-DAP-Seq(GSE60143)/Homer	DVCKTGHNNNDCAAG	0.0001	-9.583	0.0002	830	0.0533	1509.9	0.0467
MYB118(MYB)/colamp-MYB118-DAP-Seq(GSE60143)/Homer	TAWCCGTTAC	0.0001	-9.512	0.0002	412	0.0265	706.7	0.0219
AT1G69570(C2C2dof)/col-AT1G69570-DAP-Seq(GSE60143)/Homer	WAAAAGTGHH	0.0001	-9.435	0.0002	1726	0.1109	3282.5	0.1016
ATHB40(HB)/col-ATHB40-DAP-Seq(GSE60143)/Homer	HCAATWATTG	0.0001	-9.327	0.0003	903	0.058	1655.8	0.0513
At1g78700(BZR)/col-At1g78700-DAP-Seq(GSE60143)/Homer	NNNNCACGTGNNNNN	0.0001	-9.253	0.0003	648	0.0416	1160.6	0.0359
SMB(NAC)/colamp-SMB-DAP-Seq(GSE60143)/Homer	CTTVNNNNDBAAGHW	0.001	-8.976	0.0004	1189	0.0764	2223.4	0.0688
TGA3(bZIP)/colamp-TGA3-DAP-Seq(GSE60143)/Homer	WTGATGACGTCATCW	0.001	-8.948	0.0004	134	0.0086	199.2	0.0062
E-box/Arabidopsis-Promoters/Homer	GCCACGTG	0.001	-8.9	0.0004	957	0.0615	1767.8	0.0547
ANAC013(NAC)/col-ANAC013-DAP-Seq(GSE60143)/Homer	CTTGNNNNNCAAGNA	0.001	-8.814	0.0004	607	0.039	1087	0.0336
TEAD1(TEAD)/HepG2-TEAD1-ChIP-Seq(Encode)/Homer	CYRCATTCCA	0.001	-8.732	0.0005	1300	0.0835	2447.3	0.0758
TGA2(bZIP)/colamp-TGA2-DAP-Seq(GSE60143)/Homer	ACGTCAYCHH	0.001	-8.704	0.0005	901	0.0579	1660.9	0.0514
ZNF264(Zf)/HEK293-ZNF264.GFP-ChIP-Seq(GSE58341)/Homer	RGGGCACTAACY	0.001	-8.609	0.0005	1149	0.0738	2150.2	0.0666
IRF8(IRF)/BMDM-IRF8-ChIP-Seq(GSE77884)/Homer	GRAASTGAAAST	0.001	-8.599	0.0005	460	0.0296	806.6	0.025
AT3G42860(zfGRF)/col-AT3G42860-DAP-Seq(GSE60143)/Homer	CGTTGACTTN	0.001	-8.576	0.0005	363	0.0233	622.4	0.0193
MYB27(MYB)/colamp-MYB27-DAP-Seq(GSE60143)/Homer	TACCTAACWT	0.001	-8.558	0.0006	207	0.0133	332.3	0.0103
p63(p53)/Keratinocyte-p63-ChIP-Seq(GSE17611)/Homer	NNDRCATGYCYNRRCATGYH	0.001	-8.529	0.0006	613	0.0394	1101.8	0.0341
At5g47390(MYBrelated)/col-At5g47390-DAP-Seq(GSE60143)/Homer	CTTATCCA	0.001	-8.484	0.0006	1582	0.1016	3013.5	0.0933
AGL15(MADS)/col-AGL15-DAP-Seq(GSE60143)/Homer	TTTCCHWATWDGGAA	0.001	-8.391	0.0006	175	0.0112	275.8	0.0085
RARg(NR)/ES-RARg-ChIP-Seq(GSE30538)/Homer	AGGTCAAGGTCA	0.001	-8.257	0.0007	219	0.0141	356.3	0.011
Unknown3/Drosophila-Promoters/Homer	ACVAKCTGGCAGCGC	0.001	-8.24	0.0007	150	0.0096	231	0.0072
SeqBias: GCW-triplet	GCWGCWGCWGCW	0.001	-8.105	0.0009	15559	0.9996	32262	0.9987
Nanog(Homeobox)/mES-Nanog-ChIP-Seq(GSE11724)/Homer	RGCCATTAAC	0.001	-8.102	0.0009	6216	0.3994	12466.7	0.3859
ANAC075(NAC)/col-ANAC075-DAP-Seq(GSE60143)/Homer	CTTSWWNWWSAAGYT	0.001	-8.022	0.0009	449	0.0288	791.3	0.0245
LBD18(LOBAS2)/colamp-LBD18-DAP-Seq(GSE60143)/Homer	CKGAWWTTCHGS	0.001	-8.013	0.0009	3496	0.2246	6891.1	0.2133
MafF(bZIP)/HepG2-MafF-ChIP-Seq(GSE31477)/Homer	HWWGTCAGCAWWTTT	0.001	-7.967	0.001	341	0.0219	586.9	0.0182
ATHB53(HB)/col-ATHB53-DAP-Seq(GSE60143)/Homer	CAATAATT	0.001	-7.947	0.001	538	0.0346	963.5	0.0298
Reverb(NR),DR2/RAW-Reverba.biotin-ChIP-Seq(GSE45914)/Homer	GTRGGTCASTGGGTCA	0.001	-7.906	0.001	242	0.0155	401.1	0.0124
STAT6(Stat)/CD4-Stat6-ChIP-Seq(GSE22104)/Homer	ABTTCYYRRGAA	0.001	-7.887	0.001	686	0.0441	1251.2	0.0387
WRKY30(WRKY)/colamp-WRKY30-DAP-Seq(GSE60143)/Homer	CGTTGACTTN	0.001	-7.827	0.0011	383	0.0246	667.2	0.0207
AGL6(MADS)/col-AGL6-DAP-Seq(GSE60143)/Homer	TTWCCWWAWWDGGWA	0.001	-7.702	0.0012	136	0.0087	209.5	0.0065
SPL9(SBP)/colamp-SPL9-DAP-Seq(GSE60143)/Homer	BTGTACTT	0.001	-7.687	0.0013	3263	0.2096	6427	0.199
Smad3(MAD)/NPC-Smad3-ChIP-Seq(GSE36673)/Homer	TWGTCTGV	0.001	-7.557	0.0014	4752	0.3053	9473.6	0.2933
Six4(Homeobox)/MCF7-SIX4-ChIP-Seq(Encode)/Homer	TGWAAYCTGABACCB	0.001	-7.536	0.0015	80	0.0051	112.3	0.0035
GATA(Zf),IR3/iTreg-Gata3-ChIP-Seq(GSE20898)/Homer	NNNNNBAGATAWYATCTVHN	0.001	-7.529	0.0015	183	0.0118	295.9	0.0092
Pho4(bHLH)/Yeast-Pho4-ChIP-Seq(GSE29506)/Homer	AAGCACGTGBGD	0.001	-7.486	0.0015	422	0.0271	745.6	0.0231
PRDM15(Zf)/ESC-Prdm15-ChIP-Seq(GSE73694)/Homer	YCCDNTCCAGGTTTT	0.001	-7.28	0.0019	1632	0.1049	3138.4	0.0972
VND3(NAC)/colamp-VND3-DAP-Seq(GSE60143)/Homer	TRCTTGWDNHWCAAG	0.001	-7.172	0.0021	854	0.0549	1591.3	0.0493
DREF/Drosophila-Promoters/Homer	AVYTATCGATAD	0.001	-7.109	0.0022	31	0.002	34.8	0.0011
LBD2(LOBAS2)/colamp-LBD2-DAP-Seq(GSE60143)/Homer	TCCGAWTTTTTCGGN	0.001	-6.99	0.0025	378	0.0243	666.3	0.0206
ZBTB33(Zf)/GM12878-ZBTB33-ChIP-Seq(GSE32465)/Homer	GGVTCTCGCGAGAAC	0.001	-6.987	0.0025	100	0.0064	149.4	0.0046
KLF10(Zf)/HEK293-KLF10.GFP-ChIP-Seq(GSE58341)/Homer	GGGGGTGTGTCC	0.01	-6.887	0.0027	1838	0.1181	3561.9	0.1103
E2F4(E2F)/K562-E2F4-ChIP-Seq(GSE31477)/Homer	GGCGGGAAAH	0.01	-6.77	0.0031	923	0.0593	1735	0.0537
Hoxa9(Homeobox)/ChickenMSG-Hoxa9.Flag-ChIP-Seq(GSE86088)/Homer	RGCAATNAAA	0.01	-6.755	0.0031	3845	0.247	7642.5	0.2366
Tbx20(T-box)/Heart-Tbx20-ChIP-Seq(GSE29636)/Homer	GGTGYTGACAGS	0.01	-6.703	0.0032	355	0.0228	625.8	0.0194
bHLH157(bHLH)/col-bHLH157-DAP-Seq(GSE60143)/Homer	KACACGTCTCTY	0.01	-6.647	0.0034	339	0.0218	595.6	0.0184
MYB62(MYB)/colamp-MYB62-DAP-Seq(GSE60143)/Homer	NTACCTAACT	0.01	-6.609	0.0035	1856	0.1192	3604.1	0.1116
PBX1(Homeobox)/MCF7-PBX1-ChIP-Seq(GSE28007)/Homer	GSCTGTCACTCA	0.01	-6.604	0.0036	138	0.0089	219.1	0.0068
ANAC053(NAC)/colamp-ANAC053-DAP-Seq(GSE60143)/Homer	TDCTTGNNNNNCAAG	0.01	-6.488	0.004	716	0.046	1330.8	0.0412
WRKY46(WRKY)/colamp-WRKY46-DAP-Seq(GSE60143)/Homer	AAAGTCAACGSN	0.01	-6.484	0.004	78	0.005	113	0.0035
Rbpj1(?)/Panc1-Rbpj1-ChIP-Seq(GSE47459)/Homer	HTTTCCCASG	0.01	-6.438	0.0042	2187	0.1405	4277.5	0.1324
AT3G10580(MYBrelated)/colamp-AT3G10580-DAP-Seq(GSE60143)/Homer	TACCTAACWNHW	0.01	-6.429	0.0042	540	0.0347	986.9	0.0306
TGA10(bZIP)/colamp-TGA10-DAP-Seq(GSE60143)/Homer	ATGACGTC	0.01	-6.419	0.0042	877	0.0563	1649.8	0.0511
ABF1(bZIP)/Arabidopsis-ABF1-ChIP-Seq(GSE80564)/Homer	CACGTGGC	0.01	-6.409	0.0043	1559	0.1002	3011.4	0.0932
Hoxa10(Homeobox)/ChickenMSG-Hoxa10.Flag-ChIP-Seq(GSE86088)/Homer	GGYAATGAAA	0.01	-6.246	0.005	744	0.0478	1389.7	0.043
NPAS2(bHLH)/Liver-NPAS2-ChIP-Seq(GSE39860)/Homer	KCCACGTGAC	0.01	-6.2	0.0052	2040	0.1311	3986.3	0.1234
WRKY17(WRKY)/colamp-WRKY17-DAP-Seq(GSE60143)/Homer	GCGTTGACTTTT	0.01	-6.194	0.0052	18	0.0012	17.8	0.0006
Tcfcp2l1(CP2)/mES-Tcfcp2l1-ChIP-Seq(GSE11431)/Homer	NRAACCRGTTYRAACCRGYT	0.01	-6.164	0.0054	245	0.0157	421.6	0.0131
FRS9(ND)/col-FRS9-DAP-Seq(GSE60143)/Homer	RGAGAGAGAAAG	0.01	-6.148	0.0054	496	0.0319	904.3	0.028
AZF1(C2H2)/colamp-AZF1-DAP-Seq(GSE60143)/Homer	DKSWCACT	0.01	-6.145	0.0055	8722	0.5604	17732.8	0.549
ANAC070(NAC)/colamp-ANAC070-DAP-Seq(GSE60143)/Homer	CTTRHDNHNBAAGHW	0.01	-6.143	0.0055	1430	0.0919	2758	0.0854
PRDM1(Zf)/Hela-PRDM1-ChIP-Seq(GSE31477)/Homer	ACTTTCACTTTC	0.01	-6.1	0.0057	760	0.0488	1423.6	0.0441
NAC2(NAC)/colamp-NAC2-DAP-Seq(GSE60143)/Homer	TDCTTGNNNNNCAAG	0.01	-5.912	0.0068	879	0.0565	1663	0.0515
PLT3(AP2EREBP)/col-PLT3-DAP-Seq(GSE60143)/Homer	GCACGNWTHYCGAGG	0.01	-5.912	0.0068	98	0.0063	151.2	0.0047
PR(NR)/T47D-PR-ChIP-Seq(GSE31130)/Homer	VAGRACAKNCTGTBC	0.01	-5.867	0.0071	3621	0.2326	7214.5	0.2233
Hand2(bHLH)/Mesoderm-Hand2-ChIP-Seq(GSE61475)/Homer	TGACANARRCCAGRC	0.01	-5.856	0.0072	683	0.0439	1275.6	0.0395
LBD19(LOBAS2)/colamp-LBD19-DAP-Seq(GSE60143)/Homer	CCKGAAWTTCMGGAW	0.01	-5.853	0.0072	2516	0.1616	4961.9	0.1536
n-Myc(bHLH)/mES-nMyc-ChIP-Seq(GSE11431)/Homer	VRCCACGTGG	0.01	-5.831	0.0073	1409	0.0905	2723.8	0.0843
MYNN(Zf)/HEK293-MYNN.eGFP-ChIP-Seq(Encode)/Homer	TTCAAAWTAAAAGTC	0.01	-5.779	0.0077	330	0.0212	587.1	0.0182
PU.1(ETS)/ThioMac-PU.1-ChIP-Seq(GSE21512)/Homer	AGAGGAAGTG	0.01	-5.775	0.0077	785	0.0504	1478.6	0.0458
Dorsal(RHD)/Embryo-dl-ChIP-Seq(GSE65441)/Homer	GGGAAAAMCCCG	0.01	-5.72	0.0081	246	0.0158	427.1	0.0132
Tcf21(bHLH)/ArterySmoothMuscle-Tcf21-ChIP-Seq(GSE61369)/Homer	NAACAGCTGG	0.01	-5.701	0.0082	1492	0.0959	2893.7	0.0896
LMI1(HB)/colamp-LMI1-DAP-Seq(GSE60143)/Homer	AATTATTG	0.01	-5.689	0.0083	760	0.0488	1430.3	0.0443
TEAD2(TEA)/Py2T-Tead2-ChIP-Seq(GSE55709)/Homer	CCWGGAATGY	0.01	-5.674	0.0084	724	0.0465	1359.2	0.0421
Pax8(Paired,Homeobox)/Thyroid-Pax8-ChIP-Seq(GSE26938)/Homer	GTCATGCHTGRCTGS	0.01	-5.671	0.0084	584	0.0375	1083	0.0335
LIN-39(Homeobox)/cElegans.L3-LIN39-ChIP-Seq(modEncode)/Homer	ATGATTRATG	0.01	-5.658	0.0085	1403	0.0901	2715.9	0.0841
Mef2d(MADS)/Retina-Mef2d-ChIP-Seq(GSE61391)/Homer	GCTATTTTTAGC	0.01	-5.655	0.0085	214	0.0137	367.9	0.0114
AT5G25475(ABI3VP1)/col-AT5G25475-DAP-Seq(GSE60143)/Homer	RNNRNCAAGCADNDB	0.01	-5.629	0.0087	2053	0.1319	4028.5	0.1247
GATA19(C2C2gata)/colamp-GATA19-DAP-Seq(GSE60143)/Homer	ATCSGATCVG	0.01	-5.611	0.0089	87	0.0056	133.3	0.0041
VND2(NAC)/col-VND2-DAP-Seq(GSE60143)/Homer	DNCKTNNNNNNNAAG	0.01	-5.592	0.009	1192	0.0766	2293.4	0.071
IRF1(IRF)/PBMC-IRF1-ChIP-Seq(GSE43036)/Homer	GAAAGTGAAAGT	0.01	-5.562	0.0093	179	0.0115	302.9	0.0094
ANAC028(NAC)/col-ANAC028-DAP-Seq(GSE60143)/Homer	WRCTTGNNNNNCAAG	0.01	-5.417	0.0107	917	0.0589	1747.8	0.0541
IRF2(IRF)/Erythroblas-IRF2-ChIP-Seq(GSE36985)/Homer	GAAASYGAAASY	0.01	-5.388	0.011	152	0.0098	253.3	0.0078
NPAS(bHLH)/Liver-NPAS-ChIP-Seq(GSE39860)/Homer	NVCACGTG	0.01	-5.327	0.0116	3003	0.1929	5970.7	0.1848
Unknown3/Arabidopsis-Promoters/Homer	AYTAAACCGG	0.01	-5.299	0.0119	226	0.0145	393.5	0.0122
VND1(NAC)/col-VND1-DAP-Seq(GSE60143)/Homer	CTTRWDNHWYAAGYW	0.01	-5.254	0.0124	991	0.0637	1898.6	0.0588
CTCF(Zf)/CD4+-CTCF-ChIP-Seq(Barski_et_al.)/Homer	AYAGTGCCMYCTRGTGGCCA	0.01	-5.148	0.0138	265	0.017	469	0.0145
REB1/SacCer-Promoters/Homer	KCCGGGTAAYRR	0.01	-5.118	0.0142	234	0.015	410.6	0.0127
HY5(bZIP)/colamp-HY5-DAP-Seq(GSE60143)/Homer	RRTSACGTSD	0.01	-5.001	0.0159	1394	0.0896	2713.1	0.084
ETS:E-box(ETS,bHLH)/HPC7-Scl-ChIP-Seq(GSE22178)/Homer	AGGAARCAGCTG	0.01	-4.928	0.0171	127	0.0082	211	0.0065
SpiB(ETS)/OCILY3-SPIB-ChIP-Seq(GSE56857)/Homer	AAAGRGGAAGTG	0.01	-4.918	0.0172	348	0.0224	632.3	0.0196
CRC(C2C2YABBY)/col-CRC-DAP-Seq(GSE60143)/Homer	TWATSATA	0.01	-4.908	0.0173	1370	0.088	2667.7	0.0826
ANAC058(NAC)/col-ANAC058-DAP-Seq(GSE60143)/Homer	TWCTTGTDNNACAAG	0.01	-4.892	0.0176	717	0.0461	1359	0.0421
M1BP(Zf)/S2R+-M1BP-ChIP-Seq(GSE49842)/Homer	CAGTGTGACCGT	0.01	-4.876	0.0178	377	0.0242	689.3	0.0213
DEL1(E2FDP)/colamp-DEL1-DAP-Seq(GSE60143)/Homer	TTCCCGCCAA	0.01	-4.842	0.0184	9	0.0006	7.7	0.0002
At4g18890(BZR)/col-At4g18890-DAP-Seq(GSE60143)/Homer	NDBRCACGTGYR	0.01	-4.819	0.0188	393	0.0252	721.4	0.0223
MYB88(MYB)/col-MYB88-DAP-Seq(GSE60143)/Homer	HNACGCTCCT	0.01	-4.812	0.0188	3455	0.222	6913.6	0.214
ANAC042(NAC)/col-ANAC042-DAP-Seq(GSE60143)/Homer	CGTNDHNDHNACGKY	0.01	-4.806	0.0189	1066	0.0685	2058.5	0.0637
Zic(Zf)/Cerebellum-ZIC1.2-ChIP-Seq(GSE60731)/Homer	CCTGCTGAGH	0.01	-4.747	0.02	1470	0.0944	2873.6	0.089
Mef2c(MADS)/GM12878-Mef2c-ChIP-Seq(GSE32465)/Homer	DCYAAAAATAGM	0.01	-4.619	0.0227	501	0.0322	936.5	0.029
HOXA1(Homeobox)/mES-Hoxa1-ChIP-Seq(SRP084292)/Homer	TGATKGATGR	0.1	-4.477	0.0261	323	0.0208	589.4	0.0182
Pho2(bHLH)/Yeast-Pho2-ChIP-Seq(GSE29506)/Homer	CCCACGTGCT	0.1	-4.471	0.0262	964	0.0619	1861.5	0.0576
CELF2(RRM)/JSL1-CELF2-CLIP-Seq(GSE71264)/Homer	RGTGTCAG	0.1	-4.459	0.0265	575	0.0369	1085.8	0.0336
GT1(Trihelix)/col-GT1-DAP-Seq(GSE60143)/Homer	TTAACCATGGTTAAD	0.1	-4.356	0.0293	15	0.001	16.6	0.0005
bHLH80(bHLH)/col-bHLH80-DAP-Seq(GSE60143)/Homer	NNNNDCAASTTGHNN	0.1	-4.352	0.0293	1385	0.089	2712	0.084
ZNF711(Zf)/SHSY5Y-ZNF711-ChIP-Seq(GSE20673)/Homer	AGGCCTAG	0.1	-4.349	0.0293	3137	0.2015	6280.8	0.1944
Sox4(HMG)/proB-Sox4-ChIP-Seq(GSE50066)/Homer	YCTTTGTTCC	0.1	-4.344	0.0294	1215	0.0781	2369.4	0.0734
MYB121(MYB)/col-MYB121-DAP-Seq(GSE60143)/Homer	YNTACCTAACWW	0.1	-4.316	0.0302	426	0.0274	793.1	0.0246
EKLF(Zf)/Erythrocyte-Klf1-ChIP-Seq(GSE20478)/Homer	NWGGGTGTGGCY	0.1	-4.268	0.0316	339	0.0218	623.1	0.0193
PU.1:IRF8(ETS:IRF)/pDC-Irf8-ChIP-Seq(GSE66899)/Homer	GGAAGTGAAAST	0.1	-4.24	0.0324	253	0.0163	456.2	0.0141
Six1(Homeobox)/Myoblast-Six1-ChIP-Chip(GSE20150)/Homer	GKVTCADRTTWC	0.1	-4.062	0.0386	336	0.0216	620.1	0.0192
Unknown5/Drosophila-Promoters/Homer	GCTGATAASV	0.1	-3.993	0.0413	815	0.0524	1573.5	0.0487
E2F7(E2F)/Hela-E2F7-ChIP-Seq(GSE32673)/Homer	VDTTTCCCGCCA	0.1	-3.934	0.0437	231	0.0148	417.5	0.0129
Sox10(HMG)/SciaticNerve-Sox3-ChIP-Seq(GSE35132)/Homer	CCWTTGTYYB	0.1	-3.912	0.0446	2425	0.1558	4841.1	0.1499
TEAD3(TEA)/HepG2-TEAD3-ChIP-Seq(Encode)/Homer	TRCATTCCAG	0.1	-3.902	0.0449	1501	0.0964	2960.3	0.0916
ISRE(IRF)/ThioMac-LPS-Expression(GSE23622)/Homer	AGTTTCASTTTC	0.1	-3.875	0.046	83	0.0053	136.2	0.0042
BPC1(BBRBPC)/colamp-BPC1-DAP-Seq(GSE60143)/Homer	GARGAGAGAGAA	0.1	-3.868	0.0462	937	0.0602	1821.2	0.0564
TEAD(TEA)/Fibroblast-PU.1-ChIP-Seq(Unpublished)/Homer	YCWGGAATGY	0.1	-3.868	0.0462	837	0.0538	1620.9	0.0502
ANAC096(NAC)/colamp-ANAC096-DAP-Seq(GSE60143)/Homer	TACTTGWNNNWCAAG	0.1	-3.813	0.0487	800	0.0514	1547.8	0.0479
NFY(CCAAT)/Promoter/Homer	RGCCAATSRG	0.1	-3.808	0.0488	1360	0.0874	2677.1	0.0829
DPL-1(E2F)/cElegans-Adult-ChIP-Seq(modEncode)/Homer	TAGCGCGC	0.1	-3.797	0.0492	1833	0.1178	3638.6	0.1126
Sox17(HMG)/Endoderm-Sox17-ChIP-Seq(GSE61475)/Homer	CCATTGTTYB	0.1	-3.754	0.0512	949	0.061	1848.8	0.0572
ZNF322(Zf)/HEK293-ZNF322.GFP-ChIP-Seq(GSE58341)/Homer	GAGCCTGGTACTGWGCCTGR	0.1	-3.721	0.0529	457	0.0294	864.2	0.0268
SND3(NAC)/col-SND3-DAP-Seq(GSE60143)/Homer	CTTNHNNNDNAAGNH	0.1	-3.708	0.0534	859	0.0552	1668.8	0.0517
AT1G76880(Trihelix)/col-AT1G76880-DAP-Seq(GSE60143)/Homer	ACGGTAAAAW	0.1	-3.659	0.056	407	0.0261	767	0.0237
CRX(Homeobox)/Retina-Crx-ChIP-Seq(GSE20012)/Homer	GCTAATCC	0.1	-3.655	0.0561	3371	0.2166	6789.5	0.2102
NFkB-p65(RHD)/GM12787-p65-ChIP-Seq(GSE19485)/Homer	WGGGGATTTCCC	0.1	-3.654	0.0561	587	0.0377	1124.8	0.0348
DAG2(C2C2dof)/col-DAG2-DAP-Seq(GSE60143)/Homer	WWTTHACTTTTT	0.1	-3.577	0.0604	2310	0.1484	4619.4	0.143
WUS1(Homeobox)/colamp-WUS1-DAP-Seq(GSE60143)/Homer	CAWTCATTCA	0.1	-3.563	0.0611	542	0.0348	1036.7	0.0321
Tbox:Smad(T-box,MAD)/ESCd5-Smad2_3-ChIP-Seq(GSE29422)/Homer	AGGTGHCAGACA	0.1	-3.431	0.0695	283	0.0182	525.7	0.0163
ANAC071(NAC)/col-ANAC071-DAP-Seq(GSE60143)/Homer	DNCKTNDNNNHNAAG	0.1	-3.403	0.0713	1041	0.0669	2043.9	0.0633
PIF7(bHLH)/col-PIF7-DAP-Seq(GSE60143)/Homer	CCACGTGGNH	0.1	-3.401	0.0713	373	0.024	703.6	0.0218
At1g13300(G2like)/col-At1g13300-DAP-Seq(GSE60143)/Homer	GAATCTWAGATTCYN	0.1	-3.374	0.0731	11	0.0007	12.4	0.0004
Dlx3(Homeobox)/Kerainocytes-Dlx3-ChIP-Seq(GSE89884)/Homer	NDGTAATTAC	0.1	-3.372	0.0731	761	0.0489	1479.3	0.0458
AIL7(AP2EREBP)/colamp-AIL7-DAP-Seq(GSE60143)/Homer	KCACRAWTYYCGAGG	0.1	-3.366	0.0734	612	0.0393	1180.8	0.0366
RKD2(RWPRK)/colamp-RKD2-DAP-Seq(GSE60143)/Homer	GACKTTTCRDCTTCC	0.1	-3.282	0.0797	929	0.0597	1820.3	0.0564
Trl(Zf)/S2-GAGAfactor-ChIP-Seq(GSE40646)/Homer	RGAGAGAG	0.1	-3.248	0.0822	4389	0.282	8904	0.2756
IRF3(IRF)/BMDM-Irf3-ChIP-Seq(GSE67343)/Homer	AGTTTCAKTTTC	0.1	-3.192	0.0868	419	0.0269	798.2	0.0247
GFY-Staf(?,Zf)/Promoter/Homer	RACTACAATTCCCAGAAKGC	0.1	-3.167	0.0888	136	0.0087	242.5	0.0075
Myf5(bHLH)/GM-Myf5-ChIP-Seq(GSE24852)/Homer	BAACAGCTGT	0.1	-3.142	0.0909	1097	0.0705	2164.4	0.067
bZIP3(bZIP)/col-bZIP3-DAP-Seq(GSE60143)/Homer	DWKNHSACGTGGCAD	0.1	-3.068	0.0976	786	0.0505	1537.5	0.0476
Sox15(HMG)/CPA-Sox15-ChIP-Seq(GSE62909)/Homer	RAACAATGGN	0.1	-3.047	0.0995	1440	0.0925	2864.6	0.0887
GRF9(GRF)/colamp-GRF9-DAP-Seq(GSE60143)/Homer	NWCTGACANNNNNNN	0.1	-3.026	0.1014	1447	0.093	2879.6	0.0891
ZFX(Zf)/mES-Zfx-ChIP-Seq(GSE11431)/Homer	AGGCCTRG	0.1	-3.006	0.1032	2016	0.1295	4041	0.1251
AtIDD11(C2H2)/colamp-AtIDD11-DAP-Seq(GSE60143)/Homer	TTTGTCGTTT	0.1	-2.986	0.1051	541	0.0348	1046.1	0.0324
AT5G22990(C2H2)/col-AT5G22990-DAP-Seq(GSE60143)/Homer	WCGAHDTCGWHN	0.1	-2.977	0.1058	122	0.0078	217.3	0.0067
Max(bHLH)/K562-Max-ChIP-Seq(GSE31477)/Homer	RCCACGTGGYYN	0.1	-2.953	0.1081	1290	0.0829	2562.1	0.0793
ANAC017(NAC)/colamp-ANAC017-DAP-Seq(GSE60143)/Homer	TMCTTGNNNNNCAAG	0.1	-2.948	0.1084	197	0.0127	363.5	0.0113
Unknown1(NR/Ini-like)/Drosophila-Promoters/Homer	MYGGTCACACTG	0.1	-2.938	0.1093	305	0.0196	576.7	0.0179
GATA(Zf),IR4/iTreg-Gata3-ChIP-Seq(GSE20898)/Homer	NAGATWNBNATCTNN	0.1	-2.913	0.1118	94	0.006	165	0.0051
bZIP42(bZIP)/colamp-bZIP42-DAP-Seq(GSE60143)/Homer	GCCACGTCAGCA	0.1	-2.884	0.1149	7	0.0004	7.9	0.0002
SPL15(SBP)/colamp-SPL15-DAP-Seq(GSE60143)/Homer	WDWMMGTACADW	0.1	-2.882	0.1149	1990	0.1279	3993.7	0.1236
CDM1(C3H)/colamp-CDM1-DAP-Seq(GSE60143)/Homer	CCGAWAWTWTCGGAN	0.1	-2.878	0.115	109	0.007	193.2	0.006
Unknown2/Arabidopsis-Promoters/Homer	AAACGACGTCGTTTT	0.1	-2.867	0.1159	9	0.0006	10.8	0.0003
ZML1(C2C2gata)/colamp-ZML1-DAP-Seq(GSE60143)/Homer	ATCWYRACCGTTSRW	0.1	-2.867	0.1159	9	0.0006	10.4	0.0003
Pit1+1bp(Homeobox)/GCrat-Pit1-ChIP-Seq(GSE58009)/Homer	ATGCATAATTCA	0.1	-2.842	0.1186	358	0.023	683	0.0211
WRKY7(WRKY)/colamp-WRKY7-DAP-Seq(GSE60143)/Homer	AAAAGTCAACGSHWD	0.1	-2.83	0.1197	4	0.0003	4	0.0001
Pitx1(Homeobox)/Chicken-Pitx1-ChIP-Seq(GSE38910)/Homer	TAATCCCN	0.1	-2.819	0.1208	6102	0.392	12466.4	0.3859
AT2G31460(REMB3)/col-AT2G31460-DAP-Seq(GSE60143)/Homer	WNWARWDGAAATGAT	0.1	-2.779	0.1255	401	0.0258	770.4	0.0238
DEL2(E2FDP)/col-DEL2-DAP-Seq(GSE60143)/Homer	WTTTCSCGCC	0.1	-2.674	0.139	533	0.0342	1037.4	0.0321
VRN1(ABI3VP1)/col-VRN1-DAP-Seq(GSE60143)/Homer	TTTTTTTTTT	0.1	-2.667	0.1398	518	0.0333	1007.3	0.0312
GBF5(bZIP)/colamp-GBF5-DAP-Seq(GSE60143)/Homer	WKNWSACGTGGCAWN	0.1	-2.647	0.1424	469	0.0301	909.6	0.0282
Rfx6(HTH)/Min6b1-Rfx6.HA-ChIP-Seq(GSE62844)/Homer	TGTTKCCTAGCAACM	0.1	-2.587	0.1509	1694	0.1088	3400.2	0.1053
NST1(NAC)/colamp-NST1-DAP-Seq(GSE60143)/Homer	WRCTTRWWNWWYAAG	0.1	-2.58	0.1515	1037	0.0666	2060.3	0.0638
AT1G19040(NAC)/col-AT1G19040-DAP-Seq(GSE60143)/Homer	CTTGNDNHNCAAGYW	0.1	-2.54	0.1574	184	0.0118	343.7	0.0106
AtGRF6(GRF)/col-AtGRF6-DAP-Seq(GSE60143)/Homer	NTGTCAGADNNNNNN	0.1	-2.505	0.1627	1834	0.1178	3691	0.1143
PU.1-IRF(ETS:IRF)/Bcell-PU.1-ChIP-Seq(GSE21512)/Homer	MGGAAGTGAAAC	0.1	-2.493	0.1644	1864	0.1198	3752	0.1162
HOXA2(Homeobox)/mES-Hoxa2-ChIP-Seq(Donaldson_et_al.)/Homer	GYCATCMATCAT	0.1	-2.418	0.1768	145	0.0093	268.5	0.0083
PABPC1(?)/MEL-PABC1-CLIP-Seq(GSE69755)/Homer	HAATAAAGNN	0.1	-2.39	0.1814	2595	0.1667	5257.1	0.1627
ZBTB18(Zf)/HEK293-ZBTB18.GFP-ChIP-Seq(GSE58341)/Homer	AACATCTGGA	0.1	-2.34	0.1903	730	0.0469	1444.9	0.0447
SRS7(SRS)/colamp-SRS7-DAP-Seq(GSE60143)/Homer	HATAGGTTTH	0.1	-2.325	0.1928	5052	0.3246	10327.8	0.3197
MYB3R4(MYB)/col-MYB3R4-DAP-Seq(GSE60143)/Homer	AWWTAACCGTTR	1	-2.287	0.1998	169	0.0109	317.6	0.0098
ZNF528(Zf)/HEK293-ZNF528.GFP-ChIP-Seq(GSE58341)/Homer	AGAAATGACTTCCCT	1	-2.286	0.1998	13	0.0008	18.8	0.0006
AT2G28810(C2C2dof)/colamp-AT2G28810-DAP-Seq(GSE60143)/Homer	VAAAAAGTWA	1	-2.267	0.203	3353	0.2154	6824.9	0.2113
SCRT1(Zf)/HEK293-SCRT1.eGFP-ChIP-Seq(Encode)/Homer	GCAACAGGTG	1	-2.254	0.2054	460	0.0296	901	0.0279
bHLH122(bHLH)/col100-bHLH122-DAP-Seq(GSE60143)/Homer	NDDCAASTTGHHNWW	1	-2.222	0.2116	1195	0.0768	2395.8	0.0742
MYB33(MYB)/col-MYB33-DAP-Seq(GSE60143)/Homer	DDTYNGTTAN	1	-2.217	0.2122	2553	0.164	5180.1	0.1604
E2F3(E2F)/MEF-E2F3-ChIP-Seq(GSE71376)/Homer	BTKGGCGGGAAA	1	-2.209	0.2136	1135	0.0729	2273.6	0.0704
SeqBias: C/A-bias	MMMMMMMMMM	1	-2.202	0.2145	15556	0.9994	32273.1	0.9991
Mef2a(MADS)/HL1-Mef2a.biotin-ChIP-Seq(GSE21529)/Homer	CYAAAAATAG	1	-2.202	0.2145	445	0.0286	871.3	0.027
bHLH18(bHLH)/col-bHLH18-DAP-Seq(GSE60143)/Homer	CACGTGTTYCACGTG	1	-2.186	0.2172	36	0.0023	60.2	0.0019
Zfp809(Zf)/ES-Zfp809-ChIP-Seq(GSE70799)/Homer	GGGGCTYGKCTGGGA	1	-2.179	0.2183	329	0.0211	639	0.0198
ANAC103(NAC)/col-ANAC103-DAP-Seq(GSE60143)/Homer	AACTTGNWNWNCAAG	1	-2.175	0.2186	511	0.0328	1006	0.0311
PAX3:FKHR-fusion(Paired,Homeobox)/Rh4-PAX3:FKHR-ChIP-Seq(GSE19063)/Homer	ACCRTGACTAATTNN	1	-2.165	0.2205	256	0.0164	492.7	0.0153
Hoxa13(Homeobox)/ChickenMSG-Hoxa13.Flag-ChIP-Seq(GSE86088)/Homer	CYHATAAAAN	1	-2.155	0.2222	3387	0.2176	6901	0.2136
GATA3(Zf),DR4/iTreg-Gata3-ChIP-Seq(GSE20898)/Homer	AGATGKDGAGATAAG	1	-2.125	0.2281	89	0.0057	162.8	0.005
AGL16(MADS)/col-AGL16-DAP-Seq(GSE60143)/Homer	TWCCHWATWDGGAAA	1	-2.125	0.2281	89	0.0057	162.9	0.005
CAMTA5(CAMTA)/col-CAMTA5-DAP-Seq(GSE60143)/Homer	ACGCGTTTTANACRC	1	-2.026	0.2515	426	0.0274	837	0.0259
MYB3R5(MYB)/col-MYB3R5-DAP-Seq(GSE60143)/Homer	THYAACGGTHAWAWT	1	-2.025	0.2515	72	0.0046	130.1	0.004
SPL1(SBP)/colamp-SPL1-DAP-Seq(GSE60143)/Homer	HYGTACDTWH	1	-2.019	0.2522	2479	0.1593	5039.3	0.156
Hoxd10(Homeobox)/ChickenMSG-Hoxd10.Flag-ChIP-Seq(GSE86088)/Homer	GGCMATGAAA	1	-1.988	0.2597	1454	0.0934	2935.8	0.0909
ZNF652/HepG2-ZNF652.Flag-ChIP-Seq(Encode)/Homer	TTAACCCTTTVNKKN	1	-1.935	0.2731	308	0.0198	601	0.0186
Pknox1(Homeobox)/ES-Prep1-ChIP-Seq(GSE63282)/Homer	SCTGTCAVTCAV	1	-1.919	0.2771	346	0.0222	678.8	0.021
PCF/Arabidopsis-Promoters/Homer	NNWWWTGGGCYTDDN	1	-1.915	0.2776	274	0.0176	533.5	0.0165
RAP211(AP2EREBP)/colamp-RAP211-DAP-Seq(GSE60143)/Homer	RGCCGGCYWW	1	-1.914	0.2776	3595	0.231	7346.1	0.2274
Pax7(Paired,Homeobox),longest/Myoblast-Pax7-ChIP-Seq(GSE25064)/Homer	NTAATTDGCYAATTANNWWD	1	-1.835	0.2995	30	0.0019	51.2	0.0016
Tbr1(T-box)/Cortex-Tbr1-ChIP-Seq(GSE71384)/Homer	AAGGTGTKAA	1	-1.811	0.3064	1869	0.1201	3796	0.1175
BBX31(Orphan)/col-BBX31-DAP-Seq(GSE60143)/Homer	NAAAAAGTDA	1	-1.799	0.3094	2223	0.1428	4525.6	0.1401
SVP(MADS)/col-SVP-DAP-Seq(GSE60143)/Homer	ANTTWCCHAATTTGG	1	-1.736	0.3289	582	0.0374	1162.5	0.036
bZIP44(bZIP)/colamp-bZIP44-DAP-Seq(GSE60143)/Homer	NDTGCCACGTCAGCH	1	-1.717	0.3346	28	0.0018	48.4	0.0015
GAGA-repeat/Arabidopsis-Promoters/Homer	CTCTCTCTCY	1	-1.713	0.3353	1999	0.1284	4069.4	0.126
JGL(C2H2)/col-JGL-DAP-Seq(GSE60143)/Homer	ACYTTCAGTT	1	-1.712	0.3353	2401	0.1543	4897.1	0.1516
MYB56(MYB)/colamp-MYB56-DAP-Seq(GSE60143)/Homer	HTAACGRMHY	1	-1.704	0.337	1093	0.0702	2208.7	0.0684
BAM8(BES1)/col-BAM8-DAP-Seq(GSE60143)/Homer	NNWSACACGTGTSWN	1	-1.677	0.3457	309	0.0199	610	0.0189
Initiator/Drosophila-Promoters/Homer	NTCAGTYG	1	-1.639	0.3584	3473	0.2231	7114.5	0.2202
AGL63(MADS)/col-AGL63-DAP-Seq(GSE60143)/Homer	TTCCAAWWWTGG	1	-1.632	0.3601	907	0.0583	1830.7	0.0567
REST-NRSF(Zf)/Jurkat-NRSF-ChIP-Seq/Homer	GGMGCTGTCCATGGTGCTGA	1	-1.629	0.3606	16	0.001	26.5	0.0008
Lhx2(Homeobox)/HFSC-Lhx2-ChIP-Seq(GSE48068)/Homer	TAATTAGN	1	-1.606	0.3681	1292	0.083	2621.9	0.0812
Prop1(Homeobox)/GHFT1-PROP1.biotin-ChIP-Seq(GSE77302)/Homer	NTAATBNAATTA	1	-1.597	0.371	637	0.0409	1279.1	0.0396
IRF:BATF(IRF:bZIP)/pDC-Irf8-ChIP-Seq(GSE66899)/Homer	CTTTCANTATGACTV	1	-1.596	0.371	121	0.0078	232.3	0.0072
Tbx5(T-box)/HL1-Tbx5.biotin-ChIP-Seq(GSE21529)/Homer	AGGTGTCA	1	-1.595	0.371	5097	0.3275	10476.1	0.3243
Ap4(bHLH)/AML-Tfap4-ChIP-Seq(GSE45738)/Homer	NAHCAGCTGD	1	-1.586	0.373	1887	0.1212	3846.8	0.1191
ZNF7(Zf)/HepG2-ZNF7.Flag-ChIP-Seq(Encode)/Homer	CTGCCWVCTTTTRTA	1	-1.572	0.3775	771	0.0495	1554.7	0.0481
AT5G63260(C3H)/col-AT5G63260-DAP-Seq(GSE60143)/Homer	RAAAAAGTRA	1	-1.556	0.3828	3377	0.217	6922.9	0.2143
bZIP28(bZIP)/col-bZIP28-DAP-Seq(GSE60143)/Homer	TGCCACGTSABH	1	-1.548	0.385	423	0.0272	844.9	0.0262
SeqBias: GA-repeat	GAGAGAGAGA	1	-1.506	0.4008	9789	0.6289	20219	0.6259
GBF6(bZIP)/colamp-GBF6-DAP-Seq(GSE60143)/Homer	WWTGMCACGTCABCW	1	-1.499	0.403	325	0.0209	646.8	0.02
AREB3(bZIP)/col-AREB3-DAP-Seq(GSE60143)/Homer	NKGMCACGTGDCMNN	1	-1.49	0.4057	479	0.0308	960.4	0.0297
EFL-1(E2F)/cElegans-L1-EFL1-ChIP-Seq(modEncode)/Homer	TGCAARYGCGCTCYA	1	-1.487	0.4065	38	0.0024	69.6	0.0022
ARF16(ARF)/col-ARF16-DAP-Seq(GSE60143)/Homer	ATTTTACGAT	1	-1.434	0.4278	152	0.0098	297.8	0.0092
MYB3R1(MYB)/col-MYB3R1-DAP-Seq(GSE60143)/Homer	WWDTDACCGTTR	1	-1.425	0.4309	324	0.0208	646.1	0.02
E2F6(E2F)/Hela-E2F6-ChIP-Seq(GSE31477)/Homer	GGCGGGAARN	1	-1.421	0.4319	938	0.0603	1903.4	0.0589
Tbet(T-box)/CD8-Tbet-ChIP-Seq(GSE33802)/Homer	AGGTGTGAAM	1	-1.419	0.4319	1450	0.0932	2956.2	0.0915
DUX4(Homeobox)/Myoblasts-DUX4.V5-ChIP-Seq(GSE75791)/Homer	NWTAAYCYAATCAWN	1	-1.416	0.4323	60	0.0039	113.4	0.0035
Mef2b(MADS)/HEK293-Mef2b.V5-ChIP-Seq(GSE67450)/Homer	GCTATTTTTGGM	1	-1.366	0.4535	909	0.0584	1846.1	0.0571
NFAT:AP1(RHD,bZIP)/Jurkat-NFATC1-ChIP-Seq(Jolma_et_al.)/Homer	SARTGGAAAAWRTGAGTCAB	1	-1.355	0.4578	173	0.0111	341.7	0.0106
PLT1(AP2EREBP)/colamp-PLT1-DAP-Seq(GSE60143)/Homer	GCACGAWTYCCGAGG	1	-1.339	0.4642	104	0.0067	202.2	0.0063
AT4G00250(GeBP)/col-AT4G00250-DAP-Seq(GSE60143)/Homer	WDTGGATAAKRT	1	-1.339	0.4642	620	0.0398	1254	0.0388
TOD6?/SacCer-Promoters/Homer	GCGATGAGMT	1	-1.325	0.4693	219	0.0141	435.6	0.0135
HOXB13(Homeobox)/ProstateTumor-HOXB13-ChIP-Seq(GSE56288)/Homer	TTTTATKRGG	1	-1.306	0.4771	1306	0.0839	2666.1	0.0825
GT3a(Trihelix)/col-GT3a-DAP-Seq(GSE60143)/Homer	WNACACGTGTYWWAW	1	-1.305	0.4771	262	0.0168	523.8	0.0162
HOXA9(Homeobox)/HSC-Hoxa9-ChIP-Seq(GSE33509)/Homer	GGCCATAAATCA	1	-1.302	0.4772	781	0.0502	1586.1	0.0491
GATA3(Zf),DR8/iTreg-Gata3-ChIP-Seq(GSE20898)/Homer	AGATSTNDNNDSAGATAASN	1	-1.27	0.4919	95	0.0061	185.5	0.0057
AGL13(MADS)/col-AGL13-DAP-Seq(GSE60143)/Homer	TWCCAWWTWTGGWAA	1	-1.27	0.4919	39	0.0025	73.3	0.0023
At5g22890(C2H2)/col-At5g22890-DAP-Seq(GSE60143)/Homer	NSAGGTKWTATCTGD	1	-1.27	0.4919	39	0.0025	73.5	0.0023
Hoxc9(Homeobox)/Ainv15-Hoxc9-ChIP-Seq(GSE21812)/Homer	GGCCATAAATCA	1	-1.263	0.4926	561	0.036	1136.9	0.0352
MNT(bHLH)/HepG2-MNT-ChIP-Seq(Encode)/Homer	DGCACACGTG	1	-1.263	0.4926	1904	0.1223	3902.8	0.1208
dof42(C2C2dof)/col-dof42-DAP-Seq(GSE60143)/Homer	AAAAAGGC	1	-1.261	0.4926	818	0.0526	1664.3	0.0515
Unknown(Homeobox)/Limb-p300-ChIP-Seq/Homer	SSCMATWAAA	1	-1.242	0.5004	767	0.0493	1560.1	0.0483
GATA6(C2C2gata)/col200-GATA6-DAP-Seq(GSE60143)/Homer	TAGATCTARAHH	1	-1.222	0.5097	145	0.0093	287.2	0.0089
EBNA1(EBV-virus)/Raji-EBNA1-ChIP-Seq(GSE30709)/Homer	GGYAGCAYDTGCTDCCCNNN	1	-1.217	0.5117	22	0.0014	41	0.0013
bZIP48(bZIP)/colamp-bZIP48-DAP-Seq(GSE60143)/Homer	DDWWKVTSACGTGGC	1	-1.213	0.5128	503	0.0323	1019.6	0.0316
Sox9(HMG)/Limb-SOX9-ChIP-Seq(GSE73225)/Homer	AGGVNCCTTTGT	1	-1.209	0.514	1179	0.0757	2410.6	0.0746
Atoh1(bHLH)/Cerebellum-Atoh1-ChIP-Seq(GSE22111)/Homer	VNRVCAGCTGGY	1	-1.2	0.5176	1617	0.1039	3314.4	0.1026
AT5G60130(ABI3VP1)/col-AT5G60130-DAP-Seq(GSE60143)/Homer	WTTYTAAGVAAA	1	-1.198	0.5179	2407	0.1546	4946.8	0.1531
Sox2(HMG)/mES-Sox2-ChIP-Seq(GSE11431)/Homer	BCCATTGTTC	1	-1.186	0.5229	1190	0.0765	2434.4	0.0754
ABF2(bZIP)/col-ABF2-DAP-Seq(GSE60143)/Homer	KGMCACGTGDCMHHH	1	-1.177	0.5265	338	0.0217	682.4	0.0211
AGL25(MADS)/colamp-AGL25-DAP-Seq(GSE60143)/Homer	TTTCCATWTWTGGAA	1	-1.173	0.5279	55	0.0035	106	0.0033
HDG7(HB)/col-HDG7-DAP-Seq(GSE60143)/Homer	WGCATTTAATGC	1	-1.159	0.5345	164	0.0105	327	0.0101
bHLH130(bHLH)/col-bHLH130-DAP-Seq(GSE60143)/Homer	GCAACTTG	1	-1.145	0.5409	989	0.0635	2022.3	0.0626
Pitx1:Ebox(Homeobox,bHLH)/Hindlimb-Pitx1-ChIP-Seq(GSE41591)/Homer	YTAATTRAWWCCAGATGT	1	-1.142	0.5416	180	0.0116	360.5	0.0112
BORIS(Zf)/K562-CTCFL-ChIP-Seq(GSE32465)/Homer	CNNBRGCGCCCCCTGSTGGC	1	-1.127	0.5489	403	0.0259	817.6	0.0253
At1g76110(ARID)/colamp-At1g76110-DAP-Seq(GSE60143)/Homer	ATTTAATG	1	-1.127	0.5489	672	0.0432	1370.9	0.0424
c-Myc(bHLH)/mES-cMyc-ChIP-Seq(GSE11431)/Homer	VVCCACGTGG	1	-1.126	0.5489	955	0.0614	1953.7	0.0605
bZIP53(bZIP)/colamp-bZIP53-DAP-Seq(GSE60143)/Homer	NDNHSACGTGKMNNN	1	-1.122	0.5489	492	0.0316	1000.1	0.031
E2F1(E2F)/Hela-E2F1-ChIP-Seq(GSE22478)/Homer	CWGGCGGGAA	1	-1.112	0.5534	430	0.0276	873.8	0.027
Knotted(Homeobox)/Corn-KN1-ChIP-Seq(GSE39161)/Homer	GAYGNGACRGGN	1	-1.066	0.5787	2085	0.134	4291.7	0.1329
MyoG(bHLH)/C2C12-MyoG-ChIP-Seq(GSE36024)/Homer	AACAGCTG	1	-1.047	0.5886	1664	0.1069	3422.2	0.1059
AT5G66940(C2C2dof)/col-AT5G66940-DAP-Seq(GSE60143)/Homer	NNHACTTTWT	1	-1.047	0.5886	2785	0.1789	5741.5	0.1777
RBPJ:Ebox(?,bHLH)/Panc1-Rbpj1-ChIP-Seq(GSE47459)/Homer	GGGRAARRGRMCAGMTG	1	-1.046	0.5886	420	0.027	855.5	0.0265
PAX6(Paired,Homeobox)/Forebrain-Pax6-ChIP-Seq(GSE66961)/Homer	NGTGTTCAVTSAAGCGKAAA	1	-1.039	0.5904	121	0.0078	242.6	0.0075
At1g19000(MYBrelated)/colamp-At1g19000-DAP-Seq(GSE60143)/Homer	WWTGGATAADDT	1	-1.021	0.6002	892	0.0573	1829.7	0.0566
SOC1(MADS)/Seedling-SOC1-ChIP-Seq(GSE45846)/Homer	TWCCAWWTWTGG	1	-1.021	0.6002	385	0.0247	784.4	0.0243
EBF(EBF)/proBcell-EBF-ChIP-Seq(GSE21978)/Homer	DGTCCCYRGGGA	1	-1.009	0.6053	251	0.0161	509.1	0.0158
ZNF136(Zf)/HEK293-ZNF136.GFP-ChIP-Seq(GSE58341)/Homer	YTKGATAHAGTATTCTWGGTNGGCA	1	-0.9972	0.6113	100	0.0064	200.4	0.0062
Bcl6(Zf)/Liver-Bcl6-ChIP-Seq(GSE31578)/Homer	NNNCTTTCCAGGAAA	1	-0.9704	0.6268	1969	0.1265	4059.3	0.1257
NeuroG2(bHLH)/Fibroblast-NeuroG2-ChIP-Seq(GSE75910)/Homer	ACCATCTGTT	1	-0.9691	0.6268	2311	0.1485	4767.4	0.1476
GRHL2(CP2)/HBE-GRHL2-ChIP-Seq(GSE46194)/Homer	AAACYKGTTWDACMRGTTTB	1	-0.9523	0.6362	504	0.0324	1032.5	0.032
IRF4(IRF)/GM12878-IRF4-ChIP-Seq(GSE32465)/Homer	ACTGAAACCA	1	-0.9141	0.6598	554	0.0356	1137.6	0.0352
LCL1(MYBrelated)/colamp-LCL1-DAP-Seq(GSE60143)/Homer	NAAAATATCTWHWWN	1	-0.8913	0.6739	134	0.0086	272.6	0.0084
NTM2(NAC)/col-NTM2-DAP-Seq(GSE60143)/Homer	CTTRTNNNAYAAGBH	1	-0.8796	0.6806	663	0.0426	1364.6	0.0422
Tcf12(bHLH)/GM12878-Tcf12-ChIP-Seq(GSE32465)/Homer	VCAGCTGYTG	1	-0.8692	0.6866	1505	0.0967	3107.2	0.0962
Sox3(HMG)/NPC-Sox3-ChIP-Seq(GSE33059)/Homer	CCWTTGTY	1	-0.8615	0.6907	2474	0.1589	5115.4	0.1584
ZNF16(Zf)/HEK293-ZNF16.GFP-ChIP-Seq(GSE58341)/Homer	MACCTTCYATGGCTCCCTAKTGCCY	1	-0.8343	0.7086	9	0.0006	17.4	0.0005
STZ(C2H2)/colamp-STZ-DAP-Seq(GSE60143)/Homer	HNBTCACT	1	-0.8184	0.7188	9269	0.5955	19216.5	0.5949
ETS:RUNX(ETS,Runt)/Jurkat-RUNX1-ChIP-Seq(GSE17954)/Homer	RCAGGATGTGGT	1	-0.8112	0.7228	133	0.0085	272.7	0.0084
Sox6(HMG)/Myotubes-Sox6-ChIP-Seq(GSE32627)/Homer	CCATTGTTNY	1	-0.804	0.7268	2214	0.1422	4583	0.1419
NeuroD1(bHLH)/Islet-NeuroD1-ChIP-Seq(GSE30298)/Homer	GCCATCTGTT	1	-0.7802	0.7431	1167	0.075	2414.9	0.0748
DREB2(AP2EREBP)/col-DREB2-DAP-Seq(GSE60143)/Homer	TMACCGACATWA	1	-0.7738	0.7466	507	0.0326	1047	0.0324
dof43(C2C2dof)/colamp-dof43-DAP-Seq(GSE60143)/Homer	NAAAAAGTDA	1	-0.7659	0.7513	2011	0.1292	4165.6	0.129
MyoD(bHLH)/Myotube-MyoD-ChIP-Seq(GSE21614)/Homer	RRCAGCTGYTSY	1	-0.7495	0.7624	1229	0.079	2545.5	0.0788
ABI5(bZIP)/col-ABI5-DAP-Seq(GSE60143)/Homer	GCCACGTG	1	-0.7347	0.7725	683	0.0439	1414.1	0.0438
ZSCAN22(Zf)/HEK293-ZSCAN22.GFP-ChIP-Seq(GSE58341)/Homer	SMCAGTCWGAKGGAGGAGGC	1	-0.7085	0.7917	94	0.006	194.1	0.006
BZR1(BZR)/col-BZR1-DAP-Seq(GSE60143)/Homer	NNCRCACGTGCG	1	-0.6857	0.8087	218	0.014	452.3	0.014
Six2(Homeobox)/NephronProgenitor-Six2-ChIP-Seq(GSE39837)/Homer	GWAAYHTGAKMC	1	-0.6708	0.8194	1311	0.0842	2722.9	0.0843
ZIM(C2C2gata)/col-ZIM-DAP-Seq(GSE60143)/Homer	ATCSRACGGTYRAGA	1	-0.6698	0.8194	7	0.0004	14.5	0.0004
WIP5(C2H2)/colamp-WIP5-DAP-Seq(GSE60143)/Homer	TDTTCTCMAGGT	1	-0.6604	0.8253	1692	0.1087	3514.3	0.1088
AT3G51470(DBP)/col-AT3G51470-DAP-Seq(GSE60143)/Homer	TTWHGGTGCACC	1	-0.6577	0.8262	2556	0.1642	5308.4	0.1643
PRDM14(Zf)/H1-PRDM14-ChIP-Seq(GSE22767)/Homer	RGGTCTCTAACY	1	-0.6527	0.829	406	0.0261	844.4	0.0261
MYB39(MYB)/col-MYB39-DAP-Seq(GSE60143)/Homer	WWAARKTAGGTGRAA	1	-0.6523	0.829	151	0.0097	314.6	0.0097
ZNF382(Zf)/HEK293-ZNF382.GFP-ChIP-Seq(GSE58341)/Homer	GNCTGTASTRNTGBCTCHTT	1	-0.6515	0.829	28	0.0018	58.7	0.0018
bZIP:IRF(bZIP,IRF)/Th17-BatF-ChIP-Seq(GSE39756)/Homer	NAGTTTCABTHTGACTNW	1	-0.648	0.829	544	0.035	1131.2	0.035
Phox2b(Homeobox)/CLBGA-PHOX2B-ChIP-Seq(GSE90683)/Homer	TTAATTNAATTA	1	-0.6325	0.8404	192	0.0123	400.3	0.0124
CHR(?)/Hela-CellCycle-Expression/Homer	SRGTTTCAAA	1	-0.6233	0.8468	740	0.0475	1540.7	0.0477
ZKSCAN1(Zf)/HepG2-ZKSCAN1-ChIP-Seq(Encode)/Homer	GCACAYAGTAGGKCY	1	-0.6212	0.8472	34	0.0022	71	0.0022
p53(p53)/mES-cMyc-ChIP-Seq(GSE11431)/Homer	ACATGCCCGGGCAT	1	-0.619	0.8477	23	0.0015	48.6	0.0015
ZNF669(Zf)/HEK293-ZNF669.GFP-ChIP-Seq(GSE58341)/Homer	GARTGGTCATCGCCC	1	-0.6162	0.8487	101	0.0065	211.2	0.0065
RVE1(MYBrelated)/col-RVE1-DAP-Seq(GSE60143)/Homer	AAATATCT	1	-0.614	0.8492	567	0.0364	1181.3	0.0366
KAN2(G2like)/colamp-KAN2-DAP-Seq(GSE60143)/Homer	ATATTCTY	1	-0.5958	0.8634	1487	0.0955	3095.3	0.0958
GBF3(bZIP)/Arabidopsis-GBF3-ChIP-Seq(GSE80564)/Homer	TGCCACGTSAYC	1	-0.5795	0.8762	649	0.0417	1354.1	0.0419
OBP3(C2C2dof)/col-OBP3-DAP-Seq(GSE60143)/Homer	NYWACTTTTT	1	-0.5772	0.8768	4420	0.284	9190.9	0.2845
Unknown4/Drosophila-Promoters/Homer	AAAAATACCRMA	1	-0.5579	0.8924	104	0.0067	219.3	0.0068
Hoxd13(Homeobox)/ChickenMSG-Hoxd13.Flag-ChIP-Seq(GSE86088)/Homer	NCYAATAAAA	1	-0.5286	0.9175	1982	0.1273	4132.1	0.1279
OBP4(C2C2dof)/col-OBP4-DAP-Seq(GSE60143)/Homer	WTTHACTTTTTB	1	-0.5141	0.9294	1908	0.1226	3980.5	0.1232
DREB19(AP2EREBP)/colamp-DREB19-DAP-Seq(GSE60143)/Homer	AATGTCGGTK	1	-0.5119	0.93	623	0.04	1305.7	0.0404
HDG1(Homeobox)/col100-HDG1-DAP-Seq(GSE60143)/Homer	DDYAATTAATGH	1	-0.4988	0.9408	576	0.037	1208.8	0.0374
AT2G33550(Trihelix)/colamp-AT2G33550-DAP-Seq(GSE60143)/Homer	TTTAAGGGCAYTTTT	1	-0.4928	0.945	2736	0.1758	5705.3	0.1766
Ik-1	NHTTGGGAATRCC	1	-0.4819	0.9538	15565	1	32302.4	1
E2F(E2F)/Hela-CellCycle-Expression/Homer	TTSGCGCGAAAA	1	-0.4809	0.9538	99	0.0064	211.7	0.0066
HuR(?)/HEK293-HuR-CLIP-Seq(GSE87887)/Homer	BTTTGGTTTG	1	-0.4773	0.9552	5654	0.3633	11771.7	0.3644
OCT:OCT-short(POU,Homeobox)/NPC-OCT6-ChIP-Seq(GSE43916)/Homer	ATGCATWATGCATRW	1	-0.4716	0.9591	700	0.045	1469.5	0.0455
ZNF675(Zf)/HEK293-ZNF675.GFP-ChIP-Seq(GSE58341)/Homer	ARGAGGMCAAAATGW	1	-0.4536	0.975	146	0.0094	311.3	0.0096
OCT:OCT(POU,Homeobox,IR1)/NPC-Brn2-ChIP-Seq(GSE35496)/Homer	ATGAATWATTCATGA	1	-0.4478	0.9792	13	0.0008	29.9	0.0009
At4g38000(C2C2dof)/col-At4g38000-DAP-Seq(GSE60143)/Homer	WWWTWACTTTTT	1	-0.4411	0.9842	1520	0.0977	3182.2	0.0985
EBF1(EBF)/Near-E2A-ChIP-Seq(GSE21512)/Homer	GTCCCCWGGGGA	1	-0.4308	0.9928	1456	0.0935	3050.5	0.0944
TCX2(CPP)/colamp-TCX2-DAP-Seq(GSE60143)/Homer	NNWWTTYRAAHN	1	-0.4296	0.9928	1946	0.125	4071.7	0.126
DEAR5(AP2EREBP)/col-DEAR5-DAP-Seq(GSE60143)/Homer	NDWTGTCGGTGRWDN	1	-0.4107	1	165	0.0106	353.8	0.011
SeqBias: TA-repeat	TATATATATA	1	-0.4083	1	3503	0.2251	7315.5	0.2265
GATA12(C2C2gata)/col-GATA12-DAP-Seq(GSE60143)/Homer	YAGATCTRAW	1	-0.3985	1	723	0.0465	1524.9	0.0472
SPL3(SBP)/colamp-SPL3-DAP-Seq(GSE60143)/Homer	WDTTGTACGGAH	1	-0.3865	1	43	0.0028	95.8	0.003
Olig2(bHLH)/Neuron-Olig2-ChIP-Seq(GSE30882)/Homer	RCCATMTGTT	1	-0.37	1	2841	0.1825	5945.4	0.1841
CTCF-SatelliteElement(Zf?)/CD4+-CTCF-ChIP-Seq(Barski_et_al.)/Homer	TGCAGTTCCMVNWRTGGCCA	1	-0.367	1	22	0.0014	51	0.0016
ZFP3(Zf)/HEK293-ZFP3.GFP-ChIP-Seq(GSE58341)/Homer	GGGTTTTGAAGGATGARTAGGAGTT	1	-0.3659	1	2	0.0001	5.5	0.0002
Oct4:Sox17(POU,Homeobox,HMG)/F9-Sox17-ChIP-Seq(GSE44553)/Homer	CCATTGTATGCAAAT	1	-0.3593	1	126	0.0081	273.9	0.0085
REM19(REM)/colamp-REM19-DAP-Seq(GSE60143)/Homer	AAAAAAAA	1	-0.3521	1	1126	0.0723	2372.7	0.0735
ZNF143|STAF(Zf)/CUTLL-ZNF143-ChIP-Seq(GSE29600)/Homer	ATTTCCCAGVAKSCY	1	-0.3392	1	523	0.0336	1111	0.0344
ZNF189(Zf)/HEK293-ZNF189.GFP-ChIP-Seq(GSE58341)/Homer	TGGAACAGMA	1	-0.3382	1	1182	0.0759	2491.4	0.0771
COG1(C2C2dof)/col-COG1-DAP-Seq(GSE60143)/Homer	DAAAAAGTGA	1	-0.3381	1	1980	0.1272	4157.8	0.1287
Phox2a(Homeobox)/Neuron-Phox2a-ChIP-Seq(GSE31456)/Homer	YTAATYNRATTA	1	-0.3368	1	383	0.0246	817.6	0.0253
MYB105(MYB)/colamp-MYB105-DAP-Seq(GSE60143)/Homer	RATWCCGTTA	1	-0.3303	1	739	0.0475	1565.4	0.0485
AT3G52440(C2C2dof)/colamp-AT3G52440-DAP-Seq(GSE60143)/Homer	DTHACTTTTT	1	-0.3297	1	3176	0.204	6651.4	0.2059
GSC(Homeobox)/FrogEmbryos-GSC-ChIP-Seq(DRA000576)/Homer	RGGATTAR	1	-0.3262	1	1667	0.1071	3506.6	0.1086
DMRT1(DM)/Testis-DMRT1-ChIP-Seq(GSE64892)/Homer	TWGHWACAWTGTWDC	1	-0.3224	1	288	0.0185	618.2	0.0191
GAGA-repeat/SacCer-Promoters/Homer	CTYTCTYTCTCTCTC	1	-0.3179	1	5997	0.3853	12521.1	0.3876
Hoxa11(Homeobox)/ChickenMSG-Hoxa11.Flag-ChIP-Seq(GSE86088)/Homer	TTTTATGGCM	1	-0.3178	1	3047	0.1958	6385.8	0.1977
DUX(Homeobox)/C2C12-Dux-ChIP-Seq(GSE87279)/Homer	BCWGATTCAATCAAN	1	-0.3013	1	3	0.0002	8.2	0.0003
Rfx1(HTH)/NPC-H3K4me1-ChIP-Seq(GSE16256)/Homer	KGTTGCCATGGCAA	1	-0.2959	1	287	0.0184	618.7	0.0192
GATA1(C2C2gata)/colamp-GATA1-DAP-Seq(GSE60143)/Homer	DDWWYYAGATCTRRW	1	-0.2827	1	420	0.027	900.5	0.0279
Unknown1/Arabidopsis-Promoters/Homer	RGGGTAWWWTHGTAA	1	-0.2729	1	75	0.0048	168.2	0.0052
ANL2(HB)/col-ANL2-DAP-Seq(GSE60143)/Homer	CATTAATTGC	1	-0.2689	1	527	0.0339	1127.5	0.0349
Twist(bHLH)/HMLE-TWIST1-ChIP-Seq(Chang_et_al)/Homer	VCAKCTGGNNNCCAGMTGBN	1	-0.2576	1	173	0.0111	379.1	0.0117
EPR1(MYBrelated)/colamp-EPR1-DAP-Seq(GSE60143)/Homer	AAATATCT	1	-0.2557	1	342	0.022	738.1	0.0229
LHY1(MYBrelated)/col-LHY1-DAP-Seq(GSE60143)/Homer	AAATATCT	1	-0.2557	1	342	0.022	738.1	0.0229
CES-1(Homeobox)/cElegans-L1-CES1-ChIP-Seq(modEncode)/Homer	AAATTSAATTTN	1	-0.2517	1	554	0.0356	1186.9	0.0367
AT1G76870(Trihelix)/col-AT1G76870-DAP-Seq(GSE60143)/Homer	AAAACCRGWW	1	-0.2479	1	458	0.0294	984	0.0305
CDF3(C2C2dof)/colamp-CDF3-DAP-Seq(GSE60143)/Homer	AAAAGTRM	1	-0.2464	1	2481	0.1594	5222	0.1617
SOL1(CPP)/colamp-SOL1-DAP-Seq(GSE60143)/Homer	ATTTAAATHN	1	-0.2439	1	1877	0.1206	3961.4	0.1226
Tbx21(T-box)/GM12878-TBX21-ChIP-Seq(Encode)/Homer	AGGTGTGAAA	1	-0.2437	1	1261	0.081	2672.5	0.0827
AT4G27900(C2C2COlike)/col-AT4G27900-DAP-Seq(GSE60143)/Homer	TCTCVACCGTTSATT	1	-0.2433	1	2	0.0001	6.9	0.0002
EBF2(EBF)/BrownAdipose-EBF2-ChIP-Seq(GSE97114)/Homer	NABTCCCWDGGGAVH	1	-0.2418	1	1205	0.0774	2555.5	0.0791
GEI-11(Myb?)/cElegans-L4-GEI11-ChIP-Seq(modEncode)/Homer	CCGACAYYTYACGGG	1	-0.2418	1	72	0.0046	163.5	0.0051
AP-2alpha(AP2)/Hela-AP2alpha-ChIP-Seq(GSE31477)/Homer	ATGCCCTGAGGC	1	-0.2369	1	1185	0.0761	2514.6	0.0778
HSF6(HSF)/col-HSF6-DAP-Seq(GSE60143)/Homer	TTYTAGAAGCTTCTA	1	-0.2183	1	239	0.0154	523	0.0162
dof24(C2C2dof)/col-dof24-DAP-Seq(GSE60143)/Homer	TWMCTTTTTG	1	-0.2131	1	2812	0.1807	5923	0.1834
SPL14(SBP)/col-SPL14-DAP-Seq(GSE60143)/Homer	NNWHTGTACGGAHNH	1	-0.213	1	156	0.01	346.9	0.0107
Isl1(Homeobox)/Neuron-Isl1-ChIP-Seq(GSE31456)/Homer	CTAATKGV	1	-0.211	1	2532	0.1627	5338.1	0.1653
GATA4(C2C2gata)/col-GATA4-DAP-Seq(GSE60143)/Homer	DDWTYAGATCTR	1	-0.2061	1	896	0.0576	1913.6	0.0592
Hoxd12(Homeobox)/ChickenMSG-Hoxd12.Flag-ChIP-Seq(GSE86088)/Homer	HDGYAATGAAAN	1	-0.2038	1	2307	0.1482	4870.7	0.1508
MYB40(MYB)/col-MYB40-DAP-Seq(GSE60143)/Homer	TGGTAGGTRARA	1	-0.1908	1	388	0.0249	843.1	0.0261
Rfx2(HTH)/LoVo-RFX2-ChIP-Seq(GSE49402)/Homer	GTTGCCATGGCAACM	1	-0.189	1	143	0.0092	320.7	0.0099
AT3G10030(Trihelix)/colamp-AT3G10030-DAP-Seq(GSE60143)/Homer	GCCGTTAA	1	-0.1816	1	740	0.0475	1589.3	0.0492
bZIP68(bZIP)/col-bZIP68-DAP-Seq(GSE60143)/Homer	WGCCACGTGK	1	-0.18	1	525	0.0337	1135.6	0.0352
AT1G10720(BSD)/col-AT1G10720-DAP-Seq(GSE60143)/Homer	TTCTAGAAKCTTCTA	1	-0.1686	1	31	0.002	76	0.0024
Lhx1(Homeobox)/EmbryoCarcinoma-Lhx1-ChIP-Seq(GSE70957)/Homer	NNYTAATTAR	1	-0.1663	1	1300	0.0835	2772	0.0858
bZIP16(bZIP)/colamp-bZIP16-DAP-Seq(GSE60143)/Homer	TGCCACGTGD	1	-0.1662	1	416	0.0267	906.8	0.0281
MYB4(MYB)/col200-MYB4-DAP-Seq(GSE60143)/Homer	WAGKTAGGTARR	1	-0.1441	1	725	0.0466	1565.6	0.0485
AT2G20400(G2like)/colamp-AT2G20400-DAP-Seq(GSE60143)/Homer	DNVGAATATTCBNHN	1	-0.1423	1	107	0.0069	246.7	0.0076
EIN3(EIL)/col-EIN3-DAP-Seq(GSE60143)/Homer	ARATTCAATGWATYT	1	-0.1406	1	117	0.0075	268.1	0.0083
Unknown6/Drosophila-Promoters/Homer	AATTTTAAAA	1	-0.1369	1	941	0.0605	2023.9	0.0627
KANADI1(Myb)/Seedling-KAN1-ChIP-Seq(GSE48081)/Homer	ARGAATAWWN	1	-0.1324	1	1246	0.0801	2667.9	0.0826
YY1(Zf)/Promoter/Homer	CAAGATGGCGGC	1	-0.1293	1	144	0.0093	328.8	0.0102
X-box(HTH)/NPC-H3K4me1-ChIP-Seq(GSE16256)/Homer	GGTTGCCATGGCAA	1	-0.1223	1	145	0.0093	331.8	0.0103
At5g08750(C3H)/col-At5g08750-DAP-Seq(GSE60143)/Homer	NWDTTGCGGCTR	1	-0.1215	1	549	0.0353	1198	0.0371
AT1G49560(G2like)/colamp-AT1G49560-DAP-Seq(GSE60143)/Homer	GAWTCTNWDA	1	-0.1183	1	1716	0.1102	3660.2	0.1133
HRE(HSF)/Striatum-HSF1-ChIP-Seq(GSE38000)/Homer	TTCTAGAABNTTCTA	1	-0.1137	1	234	0.015	525.8	0.0163
At3g04030(G2like)/col-At3g04030-DAP-Seq(GSE60143)/Homer	DRGAATCT	1	-0.1115	1	1082	0.0695	2328.4	0.0721
At1g74840(MYBrelated)/col100-At1g74840-DAP-Seq(GSE60143)/Homer	YHTTATCCAWWT	1	-0.1112	1	774	0.0497	1677.4	0.0519
At5g65130(AP2EREBP)/colamp-At5g65130-DAP-Seq(GSE60143)/Homer	CCRCCGACAWTN	1	-0.1097	1	329	0.0211	730	0.0226
HSFB4(HSF)/col-HSFB4-DAP-Seq(GSE60143)/Homer	TTCTAGAAGCTTCTA	1	-0.1097	1	37	0.0024	93.6	0.0029
MS188(MYB)/colamp-MS188-DAP-Seq(GSE60143)/Homer	WARKTAGGTRRA	1	-0.106	1	846	0.0544	1831.8	0.0567
DMRT6(DM)/Testis-DMRT6-ChIP-Seq(GSE60440)/Homer	YDGHTACAWTGTADC	1	-0.1047	1	231	0.0148	520.6	0.0161
At2g45680(TCP)/colamp-At2g45680-DAP-Seq(GSE60143)/Homer	GTGGGNCCCACNDND	1	-0.1039	1	70	0.0045	168.2	0.0052
Barx1(Homeobox)/Stomach-Barx1.3xFlag-ChIP-Seq(GSE69483)/Homer	AAACMATTAN	1	-0.1004	1	571	0.0367	1249.8	0.0387
HSFA1E(HSF)/col-HSFA1E-DAP-Seq(GSE60143)/Homer	TTCTAGAAGCTTCTA	1	-0.0993	1	90	0.0058	213.2	0.0066
bHLH28(bHLH)/col-bHLH28-DAP-Seq(GSE60143)/Homer	NHHTGTACGGAH	1	-0.09627	1	259	0.0166	582.5	0.018
ANAC011(NAC)/col-ANAC011-DAP-Seq(GSE60143)/Homer	TDCTTGYRNNDCAAG	1	-0.09569	1	413	0.0265	913.2	0.0283
AT1G23810(Orphan)/col-AT1G23810-DAP-Seq(GSE60143)/Homer	TTCTAGAAGSTTCTA	1	-0.09507	1	47	0.003	117.3	0.0036
SPL13(SBP)/col-SPL13-DAP-Seq(GSE60143)/Homer	WAHTGTACGGAH	1	-0.09177	1	86	0.0055	205.3	0.0064
HSF7(HSF)/colamp-HSF7-DAP-Seq(GSE60143)/Homer	TTCTAGAAGCTTCTA	1	-0.08623	1	211	0.0136	480.1	0.0149
AP-2gamma(AP2)/MCF7-TFAP2C-ChIP-Seq(GSE21234)/Homer	SCCTSAGGSCAW	1	-0.08585	1	1590	0.1022	3409.1	0.1055
At4g01280(MYBrelated)/colamp-At4g01280-DAP-Seq(GSE60143)/Homer	AAATATCT	1	-0.08484	1	545	0.035	1198.3	0.0371
NFAT(RHD)/Jurkat-NFATC1-ChIP-Seq(Jolma_et_al.)/Homer	ATTTTCCATT	1	-0.08374	1	1071	0.0688	2315.8	0.0717
At5g52660(MYBrelated)/colamp-At5g52660-DAP-Seq(GSE60143)/Homer	HAAAAATATCTW	1	-0.08259	1	467	0.03	1032.8	0.032
p53(p53)/Saos-p53-ChIP-Seq(GSE15780)/Homer	RRCATGYCYRGRCATGYYYN	1	-0.08028	1	130	0.0084	304.5	0.0094
p53(p53)/Saos-p53-ChIP-Seq/Homer	RRCATGYCYRGRCATGYYYN	1	-0.08028	1	130	0.0084	304.5	0.0094
AT2G28920(ND)/col-AT2G28920-DAP-Seq(GSE60143)/Homer	WAGATATTTWTW	1	-0.0764	1	240	0.0154	545.3	0.0169
ASL18(LOBAS2)/colamp-ASL18-DAP-Seq(GSE60143)/Homer	CCGGAAAWTCMGGAR	1	-0.07494	1	2396	0.1539	5109.1	0.1582
AGL95(ND)/col-AGL95-DAP-Seq(GSE60143)/Homer	TTCTAGAAGCTTCTA	1	-0.07334	1	115	0.0074	272.7	0.0084
AT2G20110(CPP)/colamp-AT2G20110-DAP-Seq(GSE60143)/Homer	ATTYAAATHY	1	-0.07141	1	1783	0.1146	3823	0.1184
p73(p53)/Trachea-p73-ChIP-Seq(PRJNA310161)/Homer	NRRRCAWGTCCDGRCATGYY	1	-0.07126	1	56	0.0036	140.4	0.0043
LBD13(LOBAS2)/colamp-LBD13-DAP-Seq(GSE60143)/Homer	KCCGTNWTTTBCGGC	1	-0.07082	1	1309	0.0841	2824.4	0.0874
TATA-box/Drosophila-Promoters/Homer	CTATAAAAGCSV	1	-0.06973	1	74	0.0048	181.5	0.0056
FOXA1:AR(Forkhead,NR)/LNCAP-AR-ChIP-Seq(GSE27824)/Homer	AGTAAACAAAAAAGAACAND	1	-0.06752	1	115	0.0074	273.8	0.0085
AT1G01250(AP2EREBP)/col-AT1G01250-DAP-Seq(GSE60143)/Homer	YCACCGACAHTW	1	-0.06319	1	78	0.005	191.2	0.0059
Pbx3(Homeobox)/GM12878-PBX3-ChIP-Seq(GSE32465)/Homer	SCTGTCAMTCAN	1	-0.05904	1	308	0.0198	697.5	0.0216
T1ISRE(IRF)/ThioMac-Ifnb-Expression/Homer	ACTTTCGTTTCT	1	-0.05897	1	10	0.0006	32.3	0.001
AT1G47655(C2C2dof)/colamp-AT1G47655-DAP-Seq(GSE60143)/Homer	YHACTTTTTS	1	-0.05788	1	5058	0.325	10689.6	0.3309
RRTF1(AP2EREBP)/colamp-RRTF1-DAP-Seq(GSE60143)/Homer	CCGCCGCHATTT	1	-0.05369	1	286	0.0184	651.9	0.0202
HOXD13(Homeobox)/Chicken-Hoxd13-ChIP-Seq(GSE38910)/Homer	NCYAATAAAA	1	-0.05295	1	1228	0.0789	2663.1	0.0824
OCT:OCT(POU,Homeobox)/NPC-Brn1-ChIP-Seq(GSE35496)/Homer	ATGAATATTCATGAG	1	-0.05282	1	4	0.0003	17	0.0005
dof45(C2C2dof)/col-dof45-DAP-Seq(GSE60143)/Homer	NVAWAAAGTN	1	-0.05257	1	3573	0.2296	7593.2	0.2351
Tbx6(T-box)/ESC-Tbx6-ChIP-Seq(GSE93524)/Homer	DAGGTGTBAA	1	-0.05192	1	1430	0.0919	3091.2	0.0957
NFkB-p50,p52(RHD)/Monocyte-p50-ChIP-Chip(Schreiber_et_al.)/Homer	GGGGGAATCCCC	1	-0.0512	1	127	0.0082	303.9	0.0094
Hoxd11(Homeobox)/ChickenMSG-Hoxd11.Flag-ChIP-Seq(GSE86088)/Homer	VGCCATAAAA	1	-0.05074	1	3128	0.201	6663.1	0.2063
AT3G10113(MYBrelated)/col-AT3G10113-DAP-Seq(GSE60143)/Homer	WNAAATATCWWN	1	-0.05048	1	420	0.027	942.1	0.0292
At1g64620(C2C2dof)/colamp-At1g64620-DAP-Seq(GSE60143)/Homer	CACTTTTT	1	-0.0499	1	1992	0.128	4278.3	0.1324
AT2G40260(G2like)/colamp-AT2G40260-DAP-Seq(GSE60143)/Homer	WAAAYATTCTTT	1	-0.04963	1	1766	0.1135	3802.8	0.1177
TF3A(C2H2)/col-TF3A-DAP-Seq(GSE60143)/Homer	NNDDGAGGAGGWNNN	1	-0.04759	1	1760	0.1131	3791.9	0.1174
GLIS3(Zf)/Thyroid-Glis3.GFP-ChIP-Seq(GSE103297)/Homer	CTCCCTGGGAGGCCN	1	-0.04487	1	2226	0.143	4775.7	0.1478
SPL5(SBP)/colamp-SPL5-DAP-Seq(GSE60143)/Homer	NNHGTACGGHNN	1	-0.04432	1	467	0.03	1046.8	0.0324
AT3G58630(Trihelix)/col-AT3G58630-DAP-Seq(GSE60143)/Homer	TCTCCGGCGA	1	-0.04277	1	232	0.0149	537.4	0.0166
AT3G12130(C3H)/colamp-AT3G12130-DAP-Seq(GSE60143)/Homer	TMACTTTTTV	1	-0.04156	1	3445	0.2213	7337	0.2271
HSFA6A(HSF)/col-HSFA6A-DAP-Seq(GSE60143)/Homer	RGAAGNTTCTAGAAN	1	-0.03955	1	47	0.003	124.4	0.0039
RFX(HTH)/K562-RFX3-ChIP-Seq(SRA012198)/Homer	CGGTTGCCATGGCAAC	1	-0.03798	1	129	0.0083	311.6	0.0096
LIN-15B(Zf)/cElegans-L3-LIN15B-ChIP-Seq(modEncode)/Homer	CARTGGAGCGCRYTTGCATT	1	-0.03648	1	3	0.0002	14.8	0.0005
HSFB3(HSF)/colamp-HSFB3-DAP-Seq(GSE60143)/Homer	TTCTAGAAGMTTHTW	1	-0.03546	1	66	0.0042	169.4	0.0052
RAP21(AP2EREBP)/colamp-RAP21-DAP-Seq(GSE60143)/Homer	BCACCGACAHNN	1	-0.03401	1	158	0.0102	377.3	0.0117
SGR5(C2H2)/colamp-SGR5-DAP-Seq(GSE60143)/Homer	TTTGTCTTTTTT	1	-0.03368	1	862	0.0554	1899.2	0.0588
ZNF415(Zf)/HEK293-ZNF415.GFP-ChIP-Seq(GSE58341)/Homer	GRTGMTRGAGCC	1	-0.03334	1	772	0.0496	1707.7	0.0529
IDD7(C2H2)/col-IDD7-DAP-Seq(GSE60143)/Homer	TTTGTCKTTTTN	1	-0.03269	1	471	0.0303	1062	0.0329
DDF2(AP2EREBP)/col-DDF2-DAP-Seq(GSE60143)/Homer	GATGTCGRCR	1	-0.03265	1	28	0.0018	80.6	0.0025
AT5G59990(C2C2COlike)/colamp-AT5G59990-DAP-Seq(GSE60143)/Homer	TCTCAACCGTTCATT	1	-0.03113	1	21	0.0013	63.5	0.002
Unknown-ESC-element(?)/mES-Nanog-ChIP-Seq(GSE11724)/Homer	CACAGCAGGGGG	1	-0.03107	1	824	0.0529	1820.3	0.0564
CCA(Myb)/Arabidopsis-CCA.GFP-ChIP-Seq(GSE70533)/Homer	AGATATYTTT	1	-0.03042	1	820	0.0527	1812.9	0.0561
NUC(C2H2)/col-NUC-DAP-Seq(GSE60143)/Homer	HAVAAAACGACAAAA	1	-0.02975	1	110	0.0071	271	0.0084
Adof1(C2C2dof)/col-Adof1-DAP-Seq(GSE60143)/Homer	NRWAAAGYDV	1	-0.02696	1	3954	0.254	8424.9	0.2608
AT4G37180(G2like)/col-AT4G37180-DAP-Seq(GSE60143)/Homer	AGAATCTTNN	1	-0.02602	1	1457	0.0936	3172.2	0.0982
TSO1(CPP)/col-TSO1-DAP-Seq(GSE60143)/Homer	RAATTTRAAW	1	-0.02481	1	118	0.0076	291.8	0.009
GATA11(C2C2gata)/col-GATA11-DAP-Seq(GSE60143)/Homer	DDHYYAGATCTR	1	-0.02477	1	498	0.032	1125.8	0.0349
Mouse_Recombination_Hotspot(Zf)/Testis-DMC1-ChIP-Seq(GSE24438)/Homer	ACTYKNATTCGTGNTACTTC	1	-0.02385	1	65	0.0042	170.2	0.0053
ZNF41(Zf)/HEK293-ZNF41.GFP-ChIP-Seq(GSE58341)/Homer	CCTCATGGTGYCYTWYTCCCTTGTG	1	-0.0234	1	26	0.0017	77	0.0024
At1g68670(G2like)/colamp-At1g68670-DAP-Seq(GSE60143)/Homer	WNWWHNRAAGATTCT	1	-0.02284	1	452	0.029	1027.5	0.0318
MYB113(MYB)/col-MYB113-DAP-Seq(GSE60143)/Homer	HNDAWTCMGTTAYWN	1	-0.02221	1	623	0.04	1397	0.0432
At5g04390(C2H2)/col200-At5g04390-DAP-Seq(GSE60143)/Homer	AGTGANDN	1	-0.02077	1	8839	0.5679	18604.7	0.576
RLR1?/SacCer-Promoters/Homer	WTTTTCYYTTTT	1	-0.02015	1	916	0.0588	2028.5	0.0628
Brn1(POU,Homeobox)/NPC-Brn1-ChIP-Seq(GSE35496)/Homer	TATGCWAATBAV	1	-0.01903	1	338	0.0217	782.3	0.0242
Smad4(MAD)/ESC-SMAD4-ChIP-Seq(GSE29422)/Homer	VBSYGTCTGG	1	-0.01796	1	2686	0.1726	5781.3	0.179
At3g45610(C2C2dof)/col-At3g45610-DAP-Seq(GSE60143)/Homer	TWACTTTTTS	1	-0.01778	1	2093	0.1345	4531.6	0.1403
CArG(MADS)/PUER-Srf-ChIP-Seq(Sullivan_et_al.)/Homer	CCATATATGGNM	1	-0.01768	1	311	0.02	724.4	0.0224
ANAC062(NAC)/colamp-ANAC062-DAP-Seq(GSE60143)/Homer	TACTTANTNWNYAAG	1	-0.01759	1	407	0.0261	934.1	0.0289
Eomes(T-box)/H9-Eomes-ChIP-Seq(GSE26097)/Homer	ATTAACACCT	1	-0.01745	1	2799	0.1798	6020.6	0.1864
AT2G38300(G2like)/col-AT2G38300-DAP-Seq(GSE60143)/Homer	ADRGAATGTT	1	-0.01707	1	1445	0.0928	3160.6	0.0978
CDX4(Homeobox)/ZebrafishEmbryos-Cdx4.Myc-ChIP-Seq(GSE48254)/Homer	NGYCATAAAWCH	1	-0.01575	1	1014	0.0651	2245	0.0695
At1g75490(AP2EREBP)/colamp-At1g75490-DAP-Seq(GSE60143)/Homer	CACCGMCT	1	-0.01517	1	2539	0.1631	5478.6	0.1696
At4g32800(AP2EREBP)/colamp-At4g32800-DAP-Seq(GSE60143)/Homer	DYCACCGACAHWWWH	1	-0.01514	1	81	0.0052	211.3	0.0065
GATA14(C2C2gata)/col-GATA14-DAP-Seq(GSE60143)/Homer	AYCAGATCTG	1	-0.01486	1	828	0.0532	1847.1	0.0572
At1g25550(G2like)/colamp-At1g25550-DAP-Seq(GSE60143)/Homer	NAGATTCY	1	-0.01449	1	1273	0.0818	2799.9	0.0867
Brn2(POU,Homeobox)/NPC-Brn2-ChIP-Seq(GSE35496)/Homer	ATGAATATTC	1	-0.01402	1	76	0.0049	200.7	0.0062
AT3G09735(S1Falike)/col-AT3G09735-DAP-Seq(GSE60143)/Homer	TTCTAGAANMTTCTA	1	-0.01394	1	451	0.029	1034.9	0.032
HSFA6B(HSF)/colamp-HSFA6B-DAP-Seq(GSE60143)/Homer	NTTCTAGAANHTTCT	1	-0.0135	1	552	0.0355	1254.7	0.0388
SeqBias: CA-repeat	CACACACACA	1	-0.01314	1	9139	0.5872	19249	0.5959
At5g66730(C2H2)/colamp-At5g66730-DAP-Seq(GSE60143)/Homer	TTTGTCKTTTTK	1	-0.01294	1	332	0.0213	775.6	0.024
ZNF692(Zf)/HEK293-ZNF692.GFP-ChIP-Seq(GSE58341)/Homer	GTGGGCCCCA	1	-0.01284	1	156	0.01	384.6	0.0119
TCF4(bHLH)/SHSY5Y-TCF4-ChIP-Seq(GSE96915)/Homer	SMCATCTGKH	1	-0.01268	1	2198	0.1412	4765.8	0.1475
DDF1(AP2EREBP)/col-DDF1-DAP-Seq(GSE60143)/Homer	GCCGACAT	1	-0.01217	1	368	0.0236	855.1	0.0265
ANAC004(NAC)/colamp-ANAC004-DAP-Seq(GSE60143)/Homer	WNCTTVYNNNRBAAG	1	-0.01055	1	382	0.0245	888.2	0.0275
AT5G05550(Trihelix)/col-AT5G05550-DAP-Seq(GSE60143)/Homer	HDNHDTCKCCGGMGA	1	-0.01054	1	2081	0.1337	4524.4	0.1401
MGP(C2H2)/colamp-MGP-DAP-Seq(GSE60143)/Homer	TTTTGTCGTTTW	1	-0.01047	1	292	0.0188	690.1	0.0214
OCT4-SOX2-TCF-NANOG(POU,Homeobox,HMG)/mES-Oct4-ChIP-Seq(GSE11431)/Homer	ATTTGCATAACAATG	1	-0.01001	1	157	0.0101	389.1	0.012
SeqBias: polyC-repeat	CCCCCCCCCC	1	-0.009733	1	15487	0.995	32178.5	0.9962
At4g28140(AP2EREBP)/colamp-At4g28140-DAP-Seq(GSE60143)/Homer	DCCACCGACCAW	1	-0.009117	1	350	0.0225	820.7	0.0254
ZBTB12(Zf)/HEK293-ZBTB12.GFP-ChIP-Seq(GSE58341)/Homer	NGNTCTAGAACCNGV	1	-0.008641	1	613	0.0394	1395.5	0.0432
AS2(LOBAS2)/col-AS2-DAP-Seq(GSE60143)/Homer	CCGDAAWWHMCGSCG	1	-0.008219	1	118	0.0076	302.3	0.0094
IDD2(C2H2)/colamp-IDD2-DAP-Seq(GSE60143)/Homer	HAVAAAAMGACAAAA	1	-0.007855	1	144	0.0093	362.5	0.0112
HRE(HSF)/HepG2-HSF1-ChIP-Seq(GSE31477)/Homer	BSTTCTRGAABVTTCYAGAA	1	-0.007673	1	165	0.0106	410.3	0.0127
PRDM10(Zf)/HEK293-PRDM10.eGFP-ChIP-Seq(Encode)/Homer	TGGTACATTCCA	1	-0.007192	1	736	0.0473	1665.2	0.0515
AT2G01818(PLATZ)/col-AT2G01818-DAP-Seq(GSE60143)/Homer	TCTAGAABSTTC	1	-0.00703	1	188	0.0121	463.6	0.0144
Oct2(POU,Homeobox)/Bcell-Oct2-ChIP-Seq(GSE21512)/Homer	ATATGCAAAT	1	-0.006391	1	297	0.0191	708.2	0.0219
STOP1(C2H2)/colamp-STOP1-DAP-Seq(GSE60143)/Homer	DTATCTGGKGRAGGT	1	-0.006357	1	496	0.0319	1146.5	0.0355
At3g12730(G2like)/colamp-At3g12730-DAP-Seq(GSE60143)/Homer	AAGATTCT	1	-0.005629	1	1673	0.1075	3678.8	0.1139
bHLH10(bHLH)/colamp-bHLH10-DAP-Seq(GSE60143)/Homer	YACCGACA	1	-0.005534	1	241	0.0155	585.3	0.0181
Zic3(Zf)/mES-Zic3-ChIP-Seq(GSE37889)/Homer	GGCCYCCTGCTGDGH	1	-0.004791	1	889	0.0571	2004.5	0.0621
At2g44940(AP2EREBP)/colamp-At2g44940-DAP-Seq(GSE60143)/Homer	NYACCGACAHNNNNN	1	-0.004578	1	167	0.0107	420.5	0.013
ZNF165(Zf)/WHIM12-ZNF165-ChIP-Seq(GSE65937)/Homer	AAGGKGRCGCAGGCA	1	-0.004521	1	163	0.0105	411.4	0.0127
SFP1/SacCer-Promoters/Homer	DDAAAAATTTTY	1	-0.004377	1	54	0.0035	156.4	0.0048
Tal1	CATCTG	1	-0.004159	1	1919	0.1233	4210.5	0.1303
MYB58(MYB)/colamp-MYB58-DAP-Seq(GSE60143)/Homer	YYYACCWACC	1	-0.004115	1	1164	0.0748	2599	0.0805
TINY(AP2EREBP)/col-TINY-DAP-Seq(GSE60143)/Homer	NNCACCGACA	1	-0.00341	1	222	0.0143	548.9	0.017
ZNF519(Zf)/HEK293-ZNF519.GFP-ChIP-Seq(GSE58341)/Homer	GAGSCCGAGC	1	-0.003081	1	374	0.024	890	0.0276
CBF2(AP2EREBP)/colamp-CBF2-DAP-Seq(GSE60143)/Homer	YBRCCGACATNNNNN	1	-0.00291	1	461	0.0296	1082.6	0.0335
DEAR3(AP2EREBP)/colamp-DEAR3-DAP-Seq(GSE60143)/Homer	BCACCGACAWNNNNN	1	-0.00283	1	298	0.0191	721.9	0.0223
NTM1(NAC)/col-NTM1-DAP-Seq(GSE60143)/Homer	ACTTRTARAASAAGT	1	-0.002825	1	561	0.036	1302.9	0.0403
TCP17(TCP)/col-TCP17-DAP-Seq(GSE60143)/Homer	GTGGTCCCCA	1	-0.002795	1	46	0.003	139	0.0043
MYB51(MYB)/col-MYB51-DAP-Seq(GSE60143)/Homer	GGTAGGTG	1	-0.002766	1	1082	0.0695	2432.5	0.0753
OBP1(C2C2dof)/col-OBP1-DAP-Seq(GSE60143)/Homer	NHHACTTTWT	1	-0.002544	1	3991	0.2564	8601.6	0.2663
MYB10(MYB)/col-MYB10-DAP-Seq(GSE60143)/Homer	YCCACCTACCHH	1	-0.00239	1	456	0.0293	1074.9	0.0333
MYB107(MYB)/col-MYB107-DAP-Seq(GSE60143)/Homer	RGTWGGTRRR	1	-0.002343	1	2064	0.1326	4535.8	0.1404
MYB92(MYB)/colamp-MYB92-DAP-Seq(GSE60143)/Homer	GGTAGGTR	1	-0.002321	1	1235	0.0793	2765.3	0.0856
MYB99(MYB)/colamp-MYB99-DAP-Seq(GSE60143)/Homer	GGTAGGTG	1	-0.001779	1	1103	0.0709	2487.9	0.077
ZNF317(Zf)/HEK293-ZNF317.GFP-ChIP-Seq(GSE58341)/Homer	GTCWGCTGTYYCTCT	1	-0.001756	1	92	0.0059	254.5	0.0079
Smad2(MAD)/ES-SMAD2-ChIP-Seq(GSE29422)/Homer	CTGTCTGG	1	-0.001712	1	2511	0.1613	5493.2	0.1701
Ascl1(bHLH)/NeuralTubes-Ascl1-ChIP-Seq(GSE55840)/Homer	NNVVCAGCTGBN	1	-0.00164	1	2384	0.1532	5225.8	0.1618
SeqBias: CG-repeat	CGCGCGCGCG	1	-0.00154	1	3380	0.2172	7333.6	0.227
Oct4(POU,Homeobox)/mES-Oct4-ChIP-Seq(GSE11431)/Homer	ATTTGCATAW	1	-0.001328	1	505	0.0324	1191.7	0.0369
MYB49(MYB)/col-MYB49-DAP-Seq(GSE60143)/Homer	ARKTAGGTRR	1	-0.001168	1	1244	0.0799	2800.1	0.0867
AT5G45580(G2like)/colamp-AT5G45580-DAP-Seq(GSE60143)/Homer	ADRGAATCTH	1	-0.001015	1	1842	0.1183	4085.7	0.1265
MYB55(MYB)/colamp-MYB55-DAP-Seq(GSE60143)/Homer	YACCWAMC	1	-0.000989	1	1325	0.0851	2978	0.0922
MYB3(MYB)/Arabidopsis-MYB3-ChIP-Seq(GSE80564)/Homer	GKTAGGTRGG	1	-0.00098	1	2304	0.148	5070.3	0.157
LOB(LOBAS2)/col-LOB-DAP-Seq(GSE60143)/Homer	CGCCGKAWWTTHCGS	1	-0.000979	1	359	0.0231	871.2	0.027
At5g29000(G2like)/col-At5g29000-DAP-Seq(GSE60143)/Homer	RGAATATTCYHH	1	-0.000936	1	222	0.0143	562.5	0.0174
HSF3(HSF)/colamp-HSF3-DAP-Seq(GSE60143)/Homer	NTTCTAGAAKCTTCT	1	-0.00093	1	1049	0.0674	2385	0.0738
TRP2(MYBrelated)/colamp-TRP2-DAP-Seq(GSE60143)/Homer	TAAACCCT	1	-0.000736	1	217	0.0139	553	0.0171
PTF1(TCP)/colamp-PTF1-DAP-Seq(GSE60143)/Homer	RDDGGGACCACA	1	-0.000668	1	85	0.0055	244.2	0.0076
AT1G04880(ARID)/colamp-AT1G04880-DAP-Seq(GSE60143)/Homer	AAACTATATADTATA	1	-0.000654	1	65	0.0042	195.1	0.006
AT3G60490(AP2EREBP)/colamp-AT3G60490-DAP-Seq(GSE60143)/Homer	NNRCCGACANNNNNN	1	-0.000593	1	237	0.0152	601.5	0.0186
caudal(Homeobox)/Drosophila-Embryos-ChIP-Chip(modEncode)/Homer	GGYCATAAAW	1	-0.000567	1	832	0.0535	1922.7	0.0595
At5g08330(TCP)/col-At5g08330-DAP-Seq(GSE60143)/Homer	GGRCCCAC	1	-0.000518	1	780	0.0501	1810.5	0.056
At1g77640(AP2EREBP)/col-At1g77640-DAP-Seq(GSE60143)/Homer	TGTCGGTGGA	1	-0.000393	1	194	0.0125	506.2	0.0157
Cdx2(Homeobox)/mES-Cdx2-ChIP-Seq(GSE14586)/Homer	GYMATAAAAH	1	-0.000376	1	736	0.0473	1719	0.0532
At3g09600(MYBrelated)/colamp-At3g09600-DAP-Seq(GSE60143)/Homer	AAAATATCTT	1	-0.00037	1	433	0.0278	1049.2	0.0325
HEB(bHLH)/mES-Heb-ChIP-Seq(GSE53233)/Homer	VCAGCTGBNN	1	-0.000349	1	3058	0.1965	6699.2	0.2074
At2g41835(C2H2)/col-At2g41835-DAP-Seq(GSE60143)/Homer	TTTGAAAA	1	-0.000317	1	543	0.0349	1296.5	0.0401
At1g36060(AP2EREBP)/colamp-At1g36060-DAP-Seq(GSE60143)/Homer	NNWWKGTCGGTG	1	-0.000314	1	706	0.0454	1656.8	0.0513
MYB17(MYB)/colamp-MYB17-DAP-Seq(GSE60143)/Homer	GGTAGGTGRG	1	-0.000306	1	679	0.0436	1597.1	0.0494
HSF21(HSF)/col-HSF21-DAP-Seq(GSE60143)/Homer	CTTCTAGAAGMTTYW	1	-0.000285	1	97	0.0062	279.6	0.0087
Bapx1(Homeobox)/VertebralCol-Bapx1-ChIP-Seq(GSE36672)/Homer	TTRAGTGSYK	1	-0.000245	1	3297	0.2118	7216	0.2234
CBF1(AP2EREBP)/colamp-CBF1-DAP-Seq(GSE60143)/Homer	YRCCGACATN	1	-0.000188	1	706	0.0454	1664.9	0.0515
LHY(Myb)/Seedling-LHY-ChIP-Seq(GSE52175)/Homer	ADAAATATCT	1	-0.00018	1	974	0.0626	2252.1	0.0697
At1g69690(TCP)/colamp-At1g69690-DAP-Seq(GSE60143)/Homer	NHGTGGGGCCCACHW	1	-0.000131	1	247	0.0159	639.6	0.0198
Rfx5(HTH)/GM12878-Rfx5-ChIP-Seq(GSE31477)/Homer	SCCTAGCAACAG	1	-0.000105	1	479	0.0308	1168	0.0362
At1g19210(AP2EREBP)/colamp-At1g19210-DAP-Seq(GSE60143)/Homer	HCACCGACCAHN	1	-9.6e-05	1	1532	0.0984	3474.5	0.1076
RAV1(RAV)/colamp-RAV1-DAP-Seq(GSE60143)/Homer	TWWTTTCTGTTG	1	-7.6e-05	1	1002	0.0644	2328.9	0.0721
ANAC005(NAC)/col-ANAC005-DAP-Seq(GSE60143)/Homer	WVCTTVTWNHABAAG	1	-7.4e-05	1	506	0.0325	1233.8	0.0382
Unknown2/Drosophila-Promoters/Homer	CATCMCTA	1	-7.2e-05	1	1833	0.1178	4128.6	0.1278
RUNX(Runt)/HPC7-Runx1-ChIP-Seq(GSE22178)/Homer	SAAACCACAG	1	-6.4e-05	1	997	0.0641	2320.6	0.0718
AT3G16280(AP2EREBP)/colamp-AT3G16280-DAP-Seq(GSE60143)/Homer	HCACCGACAHHDHHN	1	-6.1e-05	1	295	0.019	757.2	0.0234
AT1G12630(AP2EREBP)/colamp-AT1G12630-DAP-Seq(GSE60143)/Homer	TGTCGGCA	1	-5.9e-05	1	466	0.0299	1146.5	0.0355
MYB63(MYB)/col-MYB63-DAP-Seq(GSE60143)/Homer	BHYACCWACCHH	1	-4.9e-05	1	543	0.0349	1321.5	0.0409
Nkx2.2(Homeobox)/NPC-Nkx2.2-ChIP-Seq(GSE61673)/Homer	BTBRAGTGSN	1	-4.5e-05	1	2793	0.1794	6191.9	0.1917
SCL(bHLH)/HPC7-Scl-ChIP-Seq(GSE13511)/Homer	AVCAGCTG	1	-4.5e-05	1	6942	0.446	14911.8	0.4616
Znf263(Zf)/K562-Znf263-ChIP-Seq(GSE31477)/Homer	CVGTSCTCCC	1	-4.2e-05	1	2755	0.177	6112.7	0.1892
bcd(Homeobox)/Embryo-Bcd-ChIP-Seq(GSE86966)/Homer	VNNGGATTADNN	1	-3.5e-05	1	1514	0.0973	3455.8	0.107
MYB74(MYB)/colamp-MYB74-DAP-Seq(GSE60143)/Homer	YYYACCTACCWH	1	-3.4e-05	1	687	0.0441	1648	0.051
CBF4(AP2EREBP)/colamp-CBF4-DAP-Seq(GSE60143)/Homer	NRCCGACDWNNNNNN	1	-3.3e-05	1	672	0.0432	1614.3	0.05
AT4G26030(C2H2)/col-AT4G26030-DAP-Seq(GSE60143)/Homer	BYYACCWACY	1	-3.1e-05	1	1175	0.0755	2722	0.0843
Zac1(Zf)/Neuro2A-Plagl1-ChIP-Seq(GSE75942)/Homer	HAWGRGGCCM	1	-3.1e-05	1	3972	0.2552	8700.8	0.2694
At5g62940(C2C2dof)/col-At5g62940-DAP-Seq(GSE60143)/Homer	WHWHHACTTTTT	1	-3e-05	1	4775	0.3068	10392.1	0.3217
At5g18450(AP2EREBP)/col-At5g18450-DAP-Seq(GSE60143)/Homer	CACCGCTT	1	-3e-05	1	2474	0.1589	5521.8	0.1709
GLI3(Zf)/Limb-GLI3-ChIP-Chip(GSE11077)/Homer	CGTGGGTGGTCC	1	-2.9e-05	1	128	0.0082	370.4	0.0115
MYB67(MYB)/col-MYB67-DAP-Seq(GSE60143)/Homer	YYYACCTAAC	1	-2.9e-05	1	1124	0.0722	2611.2	0.0808
JKD(C2H2)/col-JKD-DAP-Seq(GSE60143)/Homer	TTTTGTCGTTTT	1	-2.8e-05	1	184	0.0118	506	0.0157
TCP20(TCP)/col-TCP20-DAP-Seq(GSE60143)/Homer	GGDCCCAC	1	-2.8e-05	1	436	0.028	1087.7	0.0337
ZML2(C2C2gata)/col-ZML2-DAP-Seq(GSE60143)/Homer	CATCATCATC	1	-2.6e-05	1	199	0.0128	541.5	0.0168
AT1G28160(AP2EREBP)/colamp-AT1G28160-DAP-Seq(GSE60143)/Homer	GGCGGCGG	1	-2.6e-05	1	2943	0.1891	6525	0.202
CBF3(AP2EREBP)/colamp-CBF3-DAP-Seq(GSE60143)/Homer	YNRCCGACATNN	1	-2.2e-05	1	457	0.0294	1137.6	0.0352
EGL-5(Homeobox)/cElegans-L3-EGL5-ChIP-Seq(modEncode)/Homer	ATTTAATGGG	1	-2.1e-05	1	1676	0.1077	3815.6	0.1181
SEP3(MADS)/Arabidoposis-Flower-Sep3-ChIP-Seq/Homer	CCAAAAAGGG	1	-1.5e-05	1	1428	0.0917	3284.4	0.1017
AT5G23930(mTERF)/col-AT5G23930-DAP-Seq(GSE60143)/Homer	GGCGGCTG	1	-1.4e-05	1	2887	0.1855	6420	0.1987
TCP16(TCP)/colamp-TCP16-DAP-Seq(GSE60143)/Homer	GTGGDCCYNNNNNNN	1	-1.4e-05	1	733	0.0471	1762	0.0545
PSE(SNAPc)/K562-mStart-Seq/Homer	WAVTCACCMTAASYDAAAAG	1	-1.3e-05	1	571	0.0367	1400.9	0.0434
AT5G02460(C2C2dof)/col-AT5G02460-DAP-Seq(GSE60143)/Homer	CHCCTTTT	1	-1.2e-05	1	2894	0.1859	6439.6	0.1994
ERF38(AP2EREBP)/col-ERF38-DAP-Seq(GSE60143)/Homer	CACCGACA	1	-1e-05	1	436	0.028	1099	0.034
AT1G44830(AP2EREBP)/col-AT1G44830-DAP-Seq(GSE60143)/Homer	NCCACCGACA	1	-1e-05	1	345	0.0222	890.9	0.0276
At2g03500(G2like)/col-At2g03500-DAP-Seq(GSE60143)/Homer	WWAGAATATTCT	1	-9e-06	1	167	0.0107	473.6	0.0147
DEAR2(AP2EREBP)/colamp-DEAR2-DAP-Seq(GSE60143)/Homer	HCACCGACAWHD	1	-8e-06	1	1171	0.0752	2735.4	0.0847
Otx2(Homeobox)/EpiLC-Otx2-ChIP-Seq(GSE56098)/Homer	NYTAATCCYB	1	-8e-06	1	1044	0.0671	2457.1	0.0761
E2A(bHLH)/proBcell-E2A-ChIP-Seq(GSE21978)/Homer	DNRCAGCTGY	1	-7e-06	1	2265	0.1455	5107.3	0.1581
RUNX-AML(Runt)/CD4+-PolII-ChIP-Seq(Barski_et_al.)/Homer	GCTGTGGTTW	1	-6e-06	1	924	0.0594	2196.5	0.068
At4g31060(AP2EREBP)/colamp-At4g31060-DAP-Seq(GSE60143)/Homer	CACCGACAAW	1	-6e-06	1	341	0.0219	886.7	0.0275
IDD4(C2H2)/col-IDD4-DAP-Seq(GSE60143)/Homer	TTTGTCTTTWTB	1	-5e-06	1	1410	0.0906	3264.9	0.1011
TCP7(TCP)/col-TCP7-DAP-Seq(GSE60143)/Homer	GTGGGSCCCACHHNN	1	-5e-06	1	553	0.0355	1371	0.0424
Nkx3.1(Homeobox)/LNCaP-Nkx3.1-ChIP-Seq(GSE28264)/Homer	AAGCACTTAA	1	-5e-06	1	3524	0.2264	7799.1	0.2414
HAP3(CCAATHAP3)/col-HAP3-DAP-Seq(GSE60143)/Homer	TGATGGAW	1	-4e-06	1	325	0.0209	852.1	0.0264
Oct6(POU,Homeobox)/NPC-Pou3f1-ChIP-Seq(GSE35496)/Homer	WATGCAAATGAG	1	-4e-06	1	411	0.0264	1052.2	0.0326
HINFP(Zf)/K562-HINFP.eGFP-ChIP-Seq(Encode)/Homer	TWVGGTCCGC	1	-4e-06	1	579	0.0372	1434	0.0444
ATY13(MYB)/col-ATY13-DAP-Seq(GSE60143)/Homer	YYYAACYRHH	1	-3e-06	1	4778	0.307	10460.7	0.3238
RUNX1(Runt)/Jurkat-RUNX1-ChIP-Seq(GSE29180)/Homer	AAACCACARM	1	-3e-06	1	1399	0.0899	3250.1	0.1006
AT1G77200(AP2EREBP)/colamp-AT1G77200-DAP-Seq(GSE60143)/Homer	ACCGACAHWD	1	-3e-06	1	768	0.0493	1862	0.0576
At1g22810(AP2EREBP)/colamp-At1g22810-DAP-Seq(GSE60143)/Homer	BCACCGACANNN	1	-2e-06	1	421	0.027	1080.1	0.0334
At1g72010(TCP)/colamp-At1g72010-DAP-Seq(GSE60143)/Homer	GGDCCCAC	1	-2e-06	1	595	0.0382	1476.2	0.0457
CEJ1(AP2EREBP)/col-CEJ1-DAP-Seq(GSE60143)/Homer	WWTGTCGGTG	1	-1e-06	1	1052	0.0676	2500.6	0.0774
HSFC1(HSF)/col-HSFC1-DAP-Seq(GSE60143)/Homer	HTTCTAGAADCTTCT	1	-1e-06	1	196	0.0126	557.8	0.0173
MYB96(MYB)/colamp-MYB96-DAP-Seq(GSE60143)/Homer	WGGTRGTTGG	1	-1e-06	1	1143	0.0734	2703.7	0.0837
ATY19(MYB)/col-ATY19-DAP-Seq(GSE60143)/Homer	YYCACCWACCAT	1	-1e-06	1	845	0.0543	2049.3	0.0634
At4g16750(AP2EREBP)/col-At4g16750-DAP-Seq(GSE60143)/Homer	HACCGACAHA	1	-1e-06	1	711	0.0457	1751.4	0.0542
MYB30(MYB)/colamp-MYB30-DAP-Seq(GSE60143)/Homer	AGGTAGTTGG	1	-1e-06	1	1404	0.0902	3285.2	0.1017
PRDM9(Zf)/Testis-DMC1-ChIP-Seq(GSE35498)/Homer	ADGGYAGYAGCATCT	1	-1e-06	1	488	0.0314	1247.3	0.0386
MYB94(MYB)/col-MYB94-DAP-Seq(GSE60143)/Homer	WGGTRGTTGGKA	1	-1e-06	1	454	0.0292	1170.2	0.0362
MYB93(MYB)/colamp-MYB93-DAP-Seq(GSE60143)/Homer	GGTAGGTGRD	1	0	1	1391	0.0894	3261.3	0.101
ASHR1(ND)/col-ASHR1-DAP-Seq(GSE60143)/Homer	NTGGTGAN	1	0	1	1638	0.1052	3806.4	0.1178
DREB26(AP2EREBP)/col-DREB26-DAP-Seq(GSE60143)/Homer	CCACCGACAH	1	0	1	245	0.0157	691	0.0214
TCP1(TCP)/col-TCP1-DAP-Seq(GSE60143)/Homer	GGGGGCCCMMCN	1	0	1	274	0.0176	763.6	0.0236
TATA-Box(TBP)/Promoter/Homer	CCTTTTAWAGSC	1	0	1	1503	0.0966	3533	0.1094
Zelda(Zf)/Embryo-zld-ChIP-Seq(GSE65441)/Homer	KBCTACCTGW	1	0	1	581	0.0373	1479.4	0.0458
NGA4(ABI3VP1)/col-NGA4-DAP-Seq(GSE60143)/Homer	TKNTCAGGTG	1	0	1	3890	0.2499	8675.3	0.2686
ERF105(AP2EREBP)/colamp-ERF105-DAP-Seq(GSE60143)/Homer	TGGCGGCT	1	0	1	2252	0.1447	5179.4	0.1603
MYB61(MYB)/colamp-MYB61-DAP-Seq(GSE60143)/Homer	HCYACCTACC	1	0	1	1843	0.1184	4300.1	0.1331
Rap210(AP2EREBP)/col-Rap210-DAP-Seq(GSE60143)/Homer	TGTCGGCA	1	0	1	528	0.0339	1373.9	0.0425
MYB44(MYB)/colamp-MYB44-DAP-Seq(GSE60143)/Homer	CVGTTWWKTCNGTTA	1	0	1	100	0.0064	351.1	0.0109
Nkx2.5(Homeobox)/HL1-Nkx2.5.biotin-ChIP-Seq(GSE21529)/Homer	RRSCACTYAA	1	0	1	3101	0.1992	7062.7	0.2186
At3g24120(G2like)/col-At3g24120-DAP-Seq(GSE60143)/Homer	NWWAGMATMW	1	0	1	4095	0.2631	9186.8	0.2844
MYB13(MYB)/col-MYB13-DAP-Seq(GSE60143)/Homer	HYCACCWACCHH	1	0	1	780	0.0501	1983.9	0.0614
ERF15(AP2EREBP)/colamp-ERF15-DAP-Seq(GSE60143)/Homer	WDHAGCMGCCAT	1	0	1	3348	0.2151	7620.4	0.2359
At2g01060(G2like)/colamp-At2g01060-DAP-Seq(GSE60143)/Homer	AGATKCBNWW	1	0	1	3801	0.2442	8592.4	0.266
At1g14580(C2H2)/colamp-At1g14580-DAP-Seq(GSE60143)/Homer	CASAAAAMGACAAAA	1	0	1	276	0.0177	815.1	0.0252
ERF115(AP2EREBP)/colamp-ERF115-DAP-Seq(GSE60143)/Homer	WTKRCGGCGB	1	0	1	2335	0.15	5449.8	0.1687
RUNX2(Runt)/PCa-RUNX2-ChIP-Seq(GSE33889)/Homer	NWAACCACADNN	1	0	1	1100	0.0707	2726.7	0.0844
Pit1(Homeobox)/GCrat-Pit1-ChIP-Seq(GSE58009)/Homer	ATGMATATDC	1	0	1	1071	0.0688	2667.4	0.0826
Ptf1a(bHLH)/Panc1-Ptf1a-ChIP-Seq(GSE47459)/Homer	ACAGCTGTTN	1	0	1	4172	0.268	9423.9	0.2917
ESE3(AP2EREBP)/col-ESE3-DAP-Seq(GSE60143)/Homer	GACGGTGG	1	0	1	2048	0.1316	4847.4	0.1501
IDD5(C2H2)/colamp-IDD5-DAP-Seq(GSE60143)/Homer	TTTTGTCTTTTTBTK	1	0	1	1127	0.0724	2808.5	0.0869
MYB83(MYB)/colamp-MYB83-DAP-Seq(GSE60143)/Homer	CACCAACCWH	1	0	1	2203	0.1415	5199.3	0.161
ZEB2(Zf)/SNU398-ZEB2-ChIP-Seq(GSE103048)/Homer	GNMCAGGTGTGC	1	0	1	1393	0.0895	3431.6	0.1062
AT1G71450(AP2EREBP)/col-AT1G71450-DAP-Seq(GSE60143)/Homer	DHDWTGTCGGTG	1	0	1	1997	0.1283	4783.5	0.1481
TATA-box/SacCer-Promoters/Homer	BBHWTATATA	1	0	1	406	0.0261	1168.9	0.0362
AT3G57600(AP2EREBP)/col-AT3G57600-DAP-Seq(GSE60143)/Homer	GGCGGTGG	1	0	1	1315	0.0845	3268.2	0.1012
ERF8(AP2EREBP)/colamp-ERF8-DAP-Seq(GSE60143)/Homer	CGCCGYCATW	1	0	1	1584	0.1018	3879.8	0.1201
Nkx2.1(Homeobox)/LungAC-Nkx2.1-ChIP-Seq(GSE43252)/Homer	RSCACTYRAG	1	0	1	4266	0.2741	9714	0.3007
OCT:OCT(POU,Homeobox)/NPC-OCT6-ChIP-Seq(GSE43916)/Homer	YATGCATATRCATRT	1	0	1	111	0.0071	432.8	0.0134
At2g33710(AP2EREBP)/colamp-At2g33710-DAP-Seq(GSE60143)/Homer	WTKGCGGCKR	1	0	1	2664	0.1712	6300.6	0.1951
ERF13(AP2EREBP)/colamp-ERF13-DAP-Seq(GSE60143)/Homer	TYAGCCGCCATT	1	0	1	1645	0.1057	4058.7	0.1256
ERF9(AP2EREBP)/colamp-ERF9-DAP-Seq(GSE60143)/Homer	AWATGGCGGCGG	1	0	1	514	0.033	1466.8	0.0454
SHN3(AP2EREBP)/col-SHN3-DAP-Seq(GSE60143)/Homer	CCGCCGCC	1	0	1	784	0.0504	2120.6	0.0656
CRF10(AP2EREBP)/col100-CRF10-DAP-Seq(GSE60143)/Homer	DCCGCCGYHA	1	0	1	2005	0.1288	4890.6	0.1514
PUCHI(AP2EREBP)/colamp-PUCHI-DAP-Seq(GSE60143)/Homer	GCGCCGTY	1	0	1	1328	0.0853	3376.6	0.1045
ERF73(AP2EREBP)/col-ERF73-DAP-Seq(GSE60143)/Homer	CCGCCGCC	1	0	1	1336	0.0858	3399.3	0.1052
E2A(bHLH),near_PU.1/Bcell-PU.1-ChIP-Seq(GSE21512)/Homer	NVCACCTGBN	1	0	1	2051	0.1318	5196.2	0.1609
LRF(Zf)/Erythroblasts-ZBTB7A-ChIP-Seq(GSE74977)/Homer	AAGACCCYYN	1	0	1	1823	0.1171	5192.7	0.1608
Slug(Zf)/Mesoderm-Snai2-ChIP-Seq(GSE61475)/Homer	SNGCACCTGCHS	1	0	1	769	0.0494	2126.4	0.0658
ZEB1(Zf)/PDAC-ZEB1-ChIP-Seq(GSE64557)/Homer	VCAGGTRDRY	1	0	1	2531	0.1626	6126.3	0.1897
ABR1(AP2EREBP)/colamp-ABR1-DAP-Seq(GSE60143)/Homer	AAATGGCGGCGG	1	0	1	1359	0.0873	3475.2	0.1076
ARF2(ARF)/col-ARF2-DAP-Seq(GSE60143)/Homer	TTGTCGGMWN	1	0	1	4321	0.2776	9980.1	0.309
AT1G24250(Orphan)/col-AT1G24250-DAP-Seq(GSE60143)/Homer	KTDGTTGGTDGTTGG	1	0	1	417	0.0268	1309.2	0.0405
AT4G12670(MYBrelated)/col-AT4G12670-DAP-Seq(GSE60143)/Homer	AGGGTTTAGGGTTTA	1	0	1	0	0	0.5	0
AT4G18450(AP2EREBP)/col-AT4G18450-DAP-Seq(GSE60143)/Homer	ATGGCGGCKG	1	0	1	755	0.0485	2089.9	0.0647
CRF4(AP2EREBP)/colamp-CRF4-DAP-Seq(GSE60143)/Homer	CGCCGCCA	1	0	1	1079	0.0693	3020.8	0.0935
ERF104(AP2EREBP)/col-ERF104-DAP-Seq(GSE60143)/Homer	GGCGGCGG	1	0	1	1701	0.1093	4247.9	0.1315
ERF10(AP2EREBP)/col-ERF10-DAP-Seq(GSE60143)/Homer	RTGGCGGCGG	1	0	1	1142	0.0734	3165.5	0.098
ERF11(AP2EREBP)/col-ERF11-DAP-Seq(GSE60143)/Homer	RTGGCGGCGG	1	0	1	1323	0.085	3487.9	0.108
ERF1(AP2EREBP)/colamp-ERF1-DAP-Seq(GSE60143)/Homer	GGCGGCTR	1	0	1	1157	0.0743	3014.6	0.0933
ERF2(AP2EREBP)/colamp-ERF2-DAP-Seq(GSE60143)/Homer	GGCGGCTG	1	0	1	1294	0.0831	3328.8	0.1031
ERF3(AP2EREBP)/colamp-ERF3-DAP-Seq(GSE60143)/Homer	ATGGCGGCGG	1	0	1	1067	0.0686	2858.8	0.0885
ERF4(AP2EREBP)/colamp-ERF4-DAP-Seq(GSE60143)/Homer	WDWTGGCGGCGG	1	0	1	1491	0.0958	3824	0.1184
ERF5(AP2EREBP)/colamp-ERF5-DAP-Seq(GSE60143)/Homer	DCMGCCGCCA	1	0	1	815	0.0524	2230.3	0.069
ERF7(AP2EREBP)/col-ERF7-DAP-Seq(GSE60143)/Homer	ATGRCGGCGG	1	0	1	1907	0.1225	4840.7	0.1499
ESE1(AP2EREBP)/col-ESE1-DAP-Seq(GSE60143)/Homer	GGCGGCGG	1	0	1	1404	0.0902	3634.7	0.1125
LEP(AP2EREBP)/col-LEP-DAP-Seq(GSE60143)/Homer	CDCCGCCGTC	1	0	1	576	0.037	1682.2	0.0521
RAP212(AP2EREBP)/col-RAP212-DAP-Seq(GSE60143)/Homer	CGCCGCCATTTT	1	0	1	1111	0.0714	2912.1	0.0902
RAP26(AP2EREBP)/colamp-RAP26-DAP-Seq(GSE60143)/Homer	HDATGGCGGCGG	1	0	1	1733	0.1113	4313.6	0.1335
REM16(ABI3VP1)/col-REM16-DAP-Seq(GSE60143)/Homer	DTTTTTSCCGSMAAA	1	0	1	0	0	3.8	0.0001
TCP3(TCP)/colamp-TCP3-DAP-Seq(GSE60143)/Homer	WGTGGTCCCAAHWWW	1	0	1	214	0.0137	746.2	0.0231
Unknown4/Arabidopsis-Promoters/Homer	CKTCKTCTTY	1	0	1	1090	0.07	2910	0.0901

## Sheet: AhR_Pos_Diff_Enriched
Motif Name	Consensus	P-value	Log P-value	q-value (Benjamini)	# of Target Sequences with Motif(of 15560)	% of Target Sequences with Motif	# of Background Sequences with Motif(of 32347)	% of Background Sequences with Motif
Arnt:Ahr(bHLH)/MCF7-Arnt-ChIP-Seq(Lo_et_al.)/Homer	TBGCACGCAA	1e-1404	-3235	0	4906	0.3153	2830.4	0.0875
CEBP(bZIP)/ThioMac-CEBPb-ChIP-Seq(GSE21512)/Homer	ATTGCGCAAC	1e-626	-1442	0	2543	0.1635	1549	0.0479
HNF4a(NR),DR1/HepG2-HNF4a-ChIP-Seq(GSE25021)/Homer	CARRGKBCAAAGTYCA	1e-435	-1002	0	2032	0.1306	1354.7	0.0419
HLF(bZIP)/HSC-HLF.Flag-ChIP-Seq(GSE69817)/Homer	RTTATGYAAB	1e-382	-880.7	0	2412	0.155	1956.5	0.0605
NFIL3(bZIP)/HepG2-NFIL3-ChIP-Seq(Encode)/Homer	VTTACGTAAYNNNNN	1e-378	-872.3	0	2045	0.1314	1500	0.0464
PPARa(NR),DR1/Liver-Ppara-ChIP-Seq(GSE47954)/Homer	VNAGGKCAAAGGTCA	1e-373	-859.4	0	3157	0.2029	3018.5	0.0933
COUP-TFII(NR)/K562-NR2F1-ChIP-Seq(Encode)/Homer	GKBCARAGGTCA	1e-353	-813.7	0	3905	0.251	4234.4	0.1309
HIF-1b(HLH)/T47D-HIF1b-ChIP-Seq(GSE59937)/Homer	RTACGTGC	1e-331	-763	0	4286	0.2755	4952.5	0.1531
HNF6(Homeobox)/Liver-Hnf6-ChIP-Seq(ERP000394)/Homer	NTATYGATCH	1e-299	-690.2	0	1618	0.104	1176.6	0.0364
RARa(NR)/K562-RARa-ChIP-Seq(Encode)/Homer	TTGAMCTTTG	1e-294	-677.9	0	6606	0.4246	9267	0.2865
EAR2(NR)/K562-NR2F6-ChIP-Seq(Encode)/Homer	NRBCARRGGTCA	1e-293	-675.9	0	3496	0.2247	3868.9	0.1196
ATAF1(NAC)/col-ATAF1-DAP-Seq(GSE60143)/Homer	YACGTMAY	1e-274	-632.7	0	5784	0.3718	7886.9	0.2438
Cux2(Homeobox)/Liver-Cux2-ChIP-Seq(GSE35985)/Homer	HNRAATCAAT	1e-274	-631.7	0	1371	0.0881	943.3	0.0292
COUP-TFII(NR)/Artia-Nr2f2-ChIP-Seq(GSE46497)/Homer	AGRGGTCA	1e-265	-612.2	0	4201	0.27	5166.7	0.1597
Erra(NR)/HepG2-Erra-ChIP-Seq(GSE31477)/Homer	CAAAGGTCAG	1e-256	-591.8	0	5471	0.3517	7442.1	0.2301
RXR(NR),DR1/3T3L1-RXR-ChIP-Seq(GSE13511)/Homer	TAGGGCAAAGGTCA	1e-243	-560.5	0	2892	0.1859	3163.3	0.0978
CEBP:AP1(bZIP)/ThioMac-CEBPb-ChIP-Seq(GSE21512)/Homer	DRTGTTGCAA	1e-225	-519.7	0	2054	0.132	1987.7	0.0614
PPARE(NR),DR1/3T3L1-Pparg-ChIP-Seq(GSE13511)/Homer	TGACCTTTGCCCCA	1e-216	-498.6	0	2494	0.1603	2678.9	0.0828
Foxa2(Forkhead)/Liver-Foxa2-ChIP-Seq(GSE25694)/Homer	CYTGTTTACWYW	1e-212	-488.3	0	2200	0.1414	2256.8	0.0698
ANAC046(NAC)/colamp-ANAC046-DAP-Seq(GSE60143)/Homer	ACACGYWAYC	1e-192	-443.8	0	4216	0.271	5664.3	0.1751
NAM(NAC)/col-NAM-DAP-Seq(GSE60143)/Homer	RGTTRCGTRW	1e-191	-441.9	0	2935	0.1886	3501.7	0.1082
FOXA1(Forkhead)/LNCAP-FOXA1-ChIP-Seq(GSE27824)/Homer	WAAGTAAACA	1e-191	-440.6	0	3022	0.1942	3646.7	0.1127
Fox:Ebox(Forkhead,bHLH)/Panc1-Foxa2-ChIP-Seq(GSE47459)/Homer	NNNVCTGWGYAAACASN	1e-185	-426.3	0	2711	0.1743	3178.3	0.0983
Foxa3(Forkhead)/Liver-Foxa3-ChIP-Seq(GSE77670)/Homer	BSNTGTTTACWYWGN	1e-179	-414.1	0	1048	0.0674	790.2	0.0244
Atf4(bZIP)/MEF-Atf4-ChIP-Seq(GSE35681)/Homer	MTGATGCAAT	1e-178	-411.3	0	913	0.0587	632.2	0.0195
FOXM1(Forkhead)/MCF7-FOXM1-ChIP-Seq(GSE72977)/Homer	TRTTTACTTW	1e-175	-403	0	2705	0.1739	3226.3	0.0997
FOXA1(Forkhead)/MCF7-FOXA1-ChIP-Seq(GSE26831)/Homer	WAAGTAAACA	1e-170	-392.3	0	2543	0.1635	2992.6	0.0925
ANAC038(NAC)/col-ANAC038-DAP-Seq(GSE60143)/Homer	ACACGTWAYC	1e-168	-387.2	0	4518	0.2904	6390.7	0.1976
NF1-halfsite(CTF)/LNCaP-NF1-ChIP-Seq(Unpublished)/Homer	YTGCCAAG	1e-167	-384.7	0	4140	0.2661	5722.8	0.1769
THRb(NR)/Liver-NR1A2-ChIP-Seq(GSE52613)/Homer	TRAGGTCA	1e-159	-368.3	0	8091	0.5201	13346.7	0.4126
Esrrb(NR)/mES-Esrrb-ChIP-Seq(GSE11431)/Homer	KTGACCTTGA	1e-153	-354.5	0	1874	0.1205	2034.4	0.0629
NF1(CTF)/LNCAP-NF1-ChIP-Seq(Unpublished)/Homer	CYTGGCABNSTGCCAR	1e-151	-348.3	0	1104	0.071	945.9	0.0292
TR4(NR),DR1/Hela-TR4-ChIP-Seq(GSE24685)/Homer	GAGGTCAAAGGTCA	1e-147	-338.6	0	579	0.0372	330.7	0.0102
NAP(NAC)/col-NAP-DAP-Seq(GSE60143)/Homer	ARGTTACGTRTN	1e-145	-334.1	0	2201	0.1415	2590.4	0.0801
ANAC079(NAC)/colamp-ANAC079-DAP-Seq(GSE60143)/Homer	TACACGCAACCT	1e-138	-317.8	0	1223	0.0786	1153.5	0.0357
CUX1(Homeobox)/K562-CUX1-ChIP-Seq(GSE92882)/Homer	TATCGATNAN	1e-127	-294.5	0	1399	0.0899	1447	0.0447
Foxo3(Forkhead)/U2OS-Foxo3-ChIP-Seq(E-MTAB-2701)/Homer	DGTAAACA	1e-120	-276.8	0	1748	0.1124	2016.3	0.0623
Chop(bZIP)/MEF-Chop-ChIP-Seq(GSE35681)/Homer	ATTGCATCAT	1e-118	-273.1	0	655	0.0421	475.7	0.0147
Nur77(NR)/K562-NR4A1-ChIP-Seq(GSE31363)/Homer	TGACCTTTNCNT	1e-117	-271.2	0	595	0.0382	407.6	0.0126
PHA-4(Forkhead)/cElegans-Embryos-PHA4-ChIP-Seq(modEncode)/Homer	KTGTTTGC	1e-113	-261.9	0	6769	0.4351	11223.9	0.347
FOXK2(Forkhead)/U2OS-FOXK2-ChIP-Seq(E-MTAB-2204)/Homer	SCHTGTTTACAT	1e-106	-246	0	1465	0.0942	1650.5	0.051
ANAC047(NAC)/colamp-ANAC047-DAP-Seq(GSE60143)/Homer	WACACGTAACTT	1e-100	-232.2	0	1599	0.1028	1893.8	0.0585
dHNF4(NR)/Fly-HNF4-ChIP-Seq(GSE73675)/Homer	GGTCCAAAGTCCAMT	1e-99	-228	0	259	0.0166	101.1	0.0031
FOXK1(Forkhead)/HEK293-FOXK1-ChIP-Seq(GSE51673)/Homer	NVWTGTTTAC	1e-98	-226.2	0	2195	0.1411	2886.2	0.0892
FOXP1(Forkhead)/H9-FOXP1-ChIP-Seq(GSE31006)/Homer	NYYTGTTTACHN	1e-92	-212.5	0	1102	0.0708	1175.5	0.0363
NLP7(RWPRK)/col-NLP7-DAP-Seq(GSE60143)/Homer	TGRCCYTTCR	1e-89	-205.7	0	3766	0.2421	5753.9	0.1779
HNF1b(Homeobox)/PDAC-HNF1B-ChIP-Seq(GSE64557)/Homer	GTTAATNATTAA	1e-86	-200.3	0	408	0.0262	265.1	0.0082
FoxL2(Forkhead)/Ovary-FoxL2-ChIP-Seq(GSE60858)/Homer	WWTRTAAACAVG	1e-86	-199.3	0	1783	0.1146	2284.1	0.0706
Foxf1(Forkhead)/Lung-Foxf1-ChIP-Seq(GSE77951)/Homer	WWATRTAAACAN	1e-86	-198.9	0	1923	0.1236	2518	0.0778
WRKY18(WRKY)/col-WRKY18-DAP-Seq(GSE60143)/Homer	NNNTTGACYWNNNNN	1e-85	-196.1	0	2783	0.1789	4015.1	0.1241
NF1:FOXA1(CTF,Forkhead)/LNCAP-FOXA1-ChIP-Seq(GSE27824)/Homer	WNTGTTTRYTTTGGCA	1e-80	-186.3	0	255	0.0164	120.5	0.0037
Gata2(Zf)/K562-GATA2-ChIP-Seq(GSE18829)/Homer	BBCTTATCTS	1e-77	-178.2	0	1261	0.0811	1500.8	0.0464
Gata6(Zf)/HUG1N-GATA6-ChIP-Seq(GSE51936)/Homer	YCTTATCTBN	1e-75	-173.5	0	1641	0.1055	2130.6	0.0659
Gata1(Zf)/K562-GATA1-ChIP-Seq(GSE18829)/Homer	SAGATAAGRV	1e-69	-159.8	0	1116	0.0717	1320.8	0.0408
bHLHE41(bHLH)/proB-Bhlhe41-ChIP-Seq(GSE93764)/Homer	KCACGTGMCN	1e-69	-159.7	0	3074	0.1976	4705	0.1454
WRKY55(WRKY)/col-WRKY55-DAP-Seq(GSE60143)/Homer	NCGTTGACTT	1e-69	-159	0	1947	0.1251	2699.4	0.0834
Gata4(Zf)/Heart-Gata4-ChIP-Seq(GSE35151)/Homer	NBWGATAAGR	1e-68	-157.7	0	1790	0.1151	2435.5	0.0753
AARE(HLH)/mES-cMyc-ChIP-Seq/Homer	GATTGCATCA	1e-68	-157.1	0	329	0.0211	218.2	0.0067
WRKY25(WRKY)/colamp-WRKY25-DAP-Seq(GSE60143)/Homer	NNNNHRGTCAAMNNN	1e-66	-153.4	0	1873	0.1204	2593.2	0.0802
GATA3(Zf)/iTreg-Gata3-ChIP-Seq(GSE20898)/Homer	AGATAASR	1e-65	-151.6	0	2480	0.1594	3667.7	0.1134
WRKY50(WRKY)/col-WRKY50-DAP-Seq(GSE60143)/Homer	NNTTGACTWNNGNNN	1e-63	-145.2	0	1735	0.1115	2387.8	0.0738
Foxo1(Forkhead)/RAW-Foxo1-ChIP-Seq(Fan_et_al.)/Homer	CTGTTTAC	1e-61	-141.5	0	3578	0.23	5736	0.1773
Atf1(bZIP)/K562-ATF1-ChIP-Seq(GSE31477)/Homer	GATGACGTCA	1e-61	-140.7	0	1436	0.0923	1897.7	0.0587
WRKY24(WRKY)/colamp-WRKY24-DAP-Seq(GSE60143)/Homer	CGTTGACTWW	1e-59	-137.1	0	1440	0.0926	1916.2	0.0592
WRKY71(WRKY)/col-WRKY71-DAP-Seq(GSE60143)/Homer	CKTTGACYWW	1e-56	-131.1	0	1282	0.0824	1673.5	0.0517
WRKY28(WRKY)/col-WRKY28-DAP-Seq(GSE60143)/Homer	BGTTGACTWH	1e-55	-128.2	0	2087	0.1341	3072.5	0.095
Hnf1(Homeobox)/Liver-Foxa2-Chip-Seq(GSE25694)/Homer	GGTTAAWCATTAA	1e-55	-127	0	328	0.0211	249.7	0.0077
Sp5(Zf)/mES-Sp5.Flag-ChIP-Seq(GSE72989)/Homer	RGKGGGCGGAGC	1e-54	-124.6	0	2708	0.1741	4213.9	0.1303
FXR(NR),IR1/Liver-FXR-ChIP-Seq(Chong_et_al.)/Homer	AGGTCANTGACCTB	1e-52	-120.5	0	868	0.0558	1035.1	0.032
WRKY6(WRKY)/colamp-WRKY6-DAP-Seq(GSE60143)/Homer	NCGTTGACTWWD	1e-52	-120.1	0	1442	0.0927	1981.6	0.0613
WRKY29(WRKY)/colamp-WRKY29-DAP-Seq(GSE60143)/Homer	MGTTGACTTT	1e-51	-117.7	0	1673	0.1075	2389.3	0.0739
Nr5a2(NR)/Pancreas-LRH1-ChIP-Seq(GSE34295)/Homer	BTCAAGGTCA	1e-50	-117.4	0	1675	0.1077	2394.8	0.074
Fli1(ETS)/CD8-FLI-ChIP-Seq(GSE20898)/Homer	NRYTTCCGGH	1e-49	-115.1	0	2447	0.1573	3786.3	0.117
ETV4(ETS)/HepG2-ETV4-ChIP-Seq(ENCODE)/Homer	ACCGGAAGTG	1e-49	-113	0	2484	0.1597	3865.4	0.1195
RBFox2(?)/Heart-RBFox2-CLIP-Seq(GSE57926)/Homer	TGCATGCA	1e-48	-112.6	0	4041	0.2597	6800.5	0.2102
Nr5a2(NR)/mES-Nr5a2-ChIP-Seq(GSE19019)/Homer	BTCAAGGTCA	1e-48	-111.7	0	1308	0.0841	1785.7	0.0552
Tlx?(NR)/NPC-H3K4me1-ChIP-Seq(GSE16256)/Homer	CTGGCAGSCTGCCA	1e-48	-110.9	0	980	0.063	1242.5	0.0384
WRKY15(WRKY)/col-WRKY15-DAP-Seq(GSE60143)/Homer	VGTTGACTWW	1e-47	-110	0	1601	0.1029	2296.4	0.071
Atf7(bZIP)/3T3L1-Atf7-ChIP-Seq(GSE56872)/Homer	NGRTGACGTCAY	1e-44	-103.3	0	989	0.0636	1282	0.0396
FEA4(bZIP)/Corn-FEA4-ChIP-Seq(GSE61954)/Homer	TGACGTCACS	1e-42	-98.1	0	2151	0.1383	3337.2	0.1032
WRKY75(WRKY)/col-WRKY75-DAP-Seq(GSE60143)/Homer	CGTTGACTWW	1e-41	-96.54	0	1530	0.0983	2231.4	0.069
WRKY27(WRKY)/colamp-WRKY27-DAP-Seq(GSE60143)/Homer	NHGTTGACYTWD	1e-41	-94.81	0	1484	0.0954	2158.8	0.0667
ETV1(ETS)/GIST48-ETV1-ChIP-Seq(GSE22441)/Homer	AACCGGAAGT	1e-40	-92.62	0	2845	0.1829	4657.7	0.144
Elk1(ETS)/Hela-Elk1-ChIP-Seq(GSE31477)/Homer	HACTTCCGGY	1e-38	-88.97	0	1466	0.0942	2153.7	0.0666
Elk4(ETS)/Hela-Elk4-ChIP-Seq(GSE31477)/Homer	NRYTTCCGGY	1e-38	-88.14	0	1474	0.0947	2171.2	0.0671
Sp2(Zf)/HEK293-Sp2.eGFP-ChIP-Seq(Encode)/Homer	YGGCCCCGCCCC	1e-37	-87.29	0	3426	0.2202	5799.5	0.1793
ERG(ETS)/VCaP-ERG-ChIP-Seq(GSE14097)/Homer	ACAGGAAGTG	1e-37	-86.12	0	3011	0.1935	5015.5	0.155
ELF1(ETS)/Jurkat-ELF1-ChIP-Seq(SRA014231)/Homer	AVCCGGAAGT	1e-37	-85.93	0	1358	0.0873	1977.1	0.0611
IBL1(bHLH)/Seedling-IBL1-ChIP-Seq(GSE51120)/Homer	CACGTGCC	1e-37	-85.9	0	4209	0.2705	7327.2	0.2265
WRKY31(WRKY)/colamp-WRKY31-DAP-Seq(GSE60143)/Homer	NCGTTGACTWWK	1e-35	-82.87	0	1144	0.0735	1618.6	0.05
WRKY33(WRKY)/col-WRKY33-DAP-Seq(GSE60143)/Homer	CGTTGACYAW	1e-34	-78.34	0	1267	0.0814	1852.9	0.0573
KLF3(Zf)/MEF-Klf3-ChIP-Seq(GSE44748)/Homer	NRGCCCCRCCCHBNN	1e-33	-77.1	0	1469	0.0944	2216.4	0.0685
SF1(NR)/H295R-Nr5a1-ChIP-Seq(GSE44220)/Homer	CAAGGHCANV	1e-33	-76.9	0	1131	0.0727	1621.9	0.0501
At5g05790(MYBrelated)/col-At5g05790-DAP-Seq(GSE60143)/Homer	AYCTTATC	1e-33	-76.23	0	1361	0.0875	2028.5	0.0627
HIF-1a(bHLH)/MCF7-HIF1a-ChIP-Seq(GSE28352)/Homer	TACGTGCV	1e-32	-75.63	0	738	0.0474	960.2	0.0297
WRKY20(WRKY)/col-WRKY20-DAP-Seq(GSE60143)/Homer	CKTTGACYWD	1e-32	-75.01	0	1232	0.0792	1806.3	0.0558
Zfp281(Zf)/ES-Zfp281-ChIP-Seq(GSE81042)/Homer	CCCCTCCCCCAC	1e-32	-74.51	0	640	0.0411	804.5	0.0249
At3g11280(MYBrelated)/col-At3g11280-DAP-Seq(GSE60143)/Homer	GATAAGRT	1e-31	-73.5	0	1292	0.083	1920	0.0594
Sp1(Zf)/Promoter/Homer	GGCCCCGCCCCC	1e-30	-70.38	0	1096	0.0704	1589	0.0491
RAR:RXR(NR),DR5/ES-RAR-ChIP-Seq(GSE56893)/Homer	AGGTCAAGGTCA	1e-30	-69.18	0	516	0.0332	622.7	0.0192
RORa(NR)/Liver-Rora-ChIP-Seq(GSE101115)/Homer	AAWCTAGGTCARDNN	1e-29	-68.05	0	289	0.0186	284.9	0.0088
WRKY26(WRKY)/colamp-WRKY26-DAP-Seq(GSE60143)/Homer	CGTTGACTWDKN	1e-29	-67.83	0	883	0.0568	1232.6	0.0381
WRKY14(WRKY)/colamp-WRKY14-DAP-Seq(GSE60143)/Homer	NCGTTGACTTTN	1e-28	-65.71	0	814	0.0523	1123.5	0.0347
MITF(bHLH)/MastCells-MITF-ChIP-Seq(GSE48085)/Homer	RTCATGTGAC	1e-27	-64.03	0	1748	0.1124	2797.7	0.0865
PQM-1(?)/cElegans-L3-ChIP-Seq(modEncode)/Homer	ACTGATAAGA	1e-27	-62.42	0	602	0.0387	781.6	0.0242
Atf3(bZIP)/GBM-ATF3-ChIP-Seq(GSE33912)/Homer	DATGASTCATHN	1e-26	-61.51	0	1024	0.0658	1504.4	0.0465
AP-1(bZIP)/ThioMac-PU.1-ChIP-Seq(GSE21512)/Homer	VTGACTCATC	1e-26	-60.99	0	1156	0.0743	1740.5	0.0538
Fosl2(bZIP)/3T3L1-Fosl2-ChIP-Seq(GSE56872)/Homer	NATGASTCABNN	1e-26	-59.96	0	564	0.0363	727.3	0.0225
GABPA(ETS)/Jurkat-GABPa-ChIP-Seq(GSE17954)/Homer	RACCGGAAGT	1e-26	-59.87	0	1887	0.1213	3082.4	0.0953
KLF14(Zf)/HEK293-KLF14.GFP-ChIP-Seq(GSE58341)/Homer	RGKGGGCGKGGC	1e-25	-59.64	0	3885	0.2497	6926.6	0.2141
JunB(bZIP)/DendriticCells-Junb-ChIP-Seq(GSE36099)/Homer	RATGASTCAT	1e-25	-59.25	0	873	0.0561	1251	0.0387
EWS:FLI1-fusion(ETS)/SK_N_MC-EWS:FLI1-ChIP-Seq(SRA014231)/Homer	VACAGGAAAT	1e-25	-59.03	0	1204	0.0774	1836.7	0.0568
WRKY3(WRKY)/col-WRKY3-DAP-Seq(GSE60143)/Homer	NCKTTGACYDDN	1e-25	-58.75	0	1000	0.0643	1475.2	0.0456
HIC1(Zf)/Treg-ZBTB29-ChIP-Seq(GSE99889)/Homer	TGCCAGCB	1e-25	-58.08	0	4117	0.2646	7399.7	0.2287
Atf2(bZIP)/3T3L1-Atf2-ChIP-Seq(GSE56872)/Homer	NRRTGACGTCAT	1e-25	-57.94	0	657	0.0422	888.9	0.0275
WRKY43(WRKY)/colamp-WRKY43-DAP-Seq(GSE60143)/Homer	NCGTTGACTTTT	1e-25	-57.6	0	592	0.0381	781.8	0.0242
RORgt(NR)/EL4-RORgt.Flag-ChIP-Seq(GSE56019)/Homer	AAYTAGGTCA	1e-24	-57.01	0	265	0.017	271.9	0.0084
RORgt(NR)/EL4-RORgt.Flag-ChIP-Seq(GSE56019)/Homer	AAYTAGGTCA	1e-24	-57.01	0	265	0.017	271.9	0.0084
NRF(NRF)/Promoter/Homer	STGCGCATGCGC	1e-24	-56.72	0	840	0.054	1205.9	0.0373
ETS1(ETS)/Jurkat-ETS1-ChIP-Seq(GSE17954)/Homer	ACAGGAAGTG	1e-24	-56.71	0	2075	0.1334	3457.8	0.1069
SPCH(bHLH)/Seedling-SPCH-ChIP-Seq(GSE57497)/Homer	WNBCACGTGA	1e-24	-56.66	0	2186	0.1405	3667.3	0.1134
Fra1(bZIP)/BT549-Fra1-ChIP-Seq(GSE46166)/Homer	NNATGASTCATH	1e-24	-56.43	0	860	0.0553	1241.1	0.0384
ATHB7(Homeobox)/col-ATHB7-DAP-Seq(GSE60143)/Homer	AATGATTG	1e-24	-55.4	0	1087	0.0699	1646.3	0.0509
Tgif2(Homeobox)/mES-Tgif2-ChIP-Seq(GSE55404)/Homer	TGTCANYT	1e-24	-55.36	0	5495	0.3532	10182.2	0.3148
ATHB20(Homeobox)/colamp-ATHB20-DAP-Seq(GSE60143)/Homer	CAATHATT	1e-23	-55.06	0	592	0.0381	790.8	0.0244
At5g58900(MYBrelated)/colamp-At5g58900-DAP-Seq(GSE60143)/Homer	WWWTYTTATCTWWWW	1e-23	-54.76	0	1951	0.1254	3238.6	0.1001
BATF(bZIP)/Th17-BATF-ChIP-Seq(GSE39756)/Homer	DATGASTCAT	1e-23	-54.43	0	1019	0.0655	1530.6	0.0473
Etv2(ETS)/ES-ER71-ChIP-Seq(GSE59402)/Homer(0.967)	NNAYTTCCTGHN	1e-23	-53.32	0	1810	0.1163	2984.3	0.0923
WRKY40(WRKY)/colamp-WRKY40-DAP-Seq(GSE60143)/Homer	AHWAGTCAAC	1e-23	-53.31	0	914	0.0587	1350	0.0417
EWS:ERG-fusion(ETS)/CADO_ES1-EWS:ERG-ChIP-Seq(SRA014231)/Homer	ATTTCCTGTN	1e-23	-53.26	0	1219	0.0784	1895	0.0586
RORg(NR)/Liver-Rorc-ChIP-Seq(GSE101115)/Homer	WAABTAGGTCAV	1e-23	-53.06	0	194	0.0125	179.9	0.0056
At1g49010(MYBrelated)/col-At1g49010-DAP-Seq(GSE60143)/Homer	RGATAASNTT	1e-22	-52.91	0	2580	0.1658	4449.3	0.1375
ETS(ETS)/Promoter/Homer	AACCGGAAGT	1e-22	-52.18	0	887	0.057	1309	0.0405
THRb(NR)/HepG2-THRb.Flag-ChIP-Seq(Encode)/Homer	GGTCACCTGAGGTCA	1e-22	-51.87	0	1116	0.0717	1717.4	0.0531
NF-E2(bZIP)/K562-NFE2-ChIP-Seq(GSE31477)/Homer	GATGACTCAGCA	1e-21	-50.48	0	167	0.0107	147.1	0.0045
STAT5(Stat)/mCD4+-Stat5-ChIP-Seq(GSE12346)/Homer	RTTTCTNAGAAA	1e-21	-50.4	0	645	0.0415	897.2	0.0277
Cbf1(bHLH)/Yeast-Cbf1-ChIP-Seq(GSE29506)/Homer	TCACGTGAYH	1e-21	-49.71	0	641	0.0412	893.2	0.0276
Stat3(Stat)/mES-Stat3-ChIP-Seq(GSE11431)/Homer	CTTCCGGGAA	1e-21	-49.34	0	971	0.0624	1471.3	0.0455
Fra2(bZIP)/Striatum-Fra2-ChIP-Seq(GSE43429)/Homer	GGATGACTCATC	1e-21	-49.22	0	752	0.0483	1086.7	0.0336
Ets1-distal(ETS)/CD4+-PolII-ChIP-Seq(Barski_et_al.)/Homer	MACAGGAAGT	1e-21	-48.86	0	646	0.0415	905.5	0.028
At5g08520(MYBrelated)/colamp-At5g08520-DAP-Seq(GSE60143)/Homer	ADBSTTATCY	1e-20	-48.13	0	1526	0.0981	2491.1	0.077
Bach2(bZIP)/OCILy7-Bach2-ChIP-Seq(GSE44420)/Homer	TGCTGAGTCA	1e-20	-47.41	0	376	0.0242	463.7	0.0143
WRKY65(WRKY)/colamp-WRKY65-DAP-Seq(GSE60143)/Homer	AWWWAGTCAACG	1e-20	-46.71	0	727	0.0467	1054.4	0.0326
Usf2(bHLH)/C2C12-Usf2-ChIP-Seq(GSE36030)/Homer	GTCACGTGGT	1e-20	-46.67	0	679	0.0436	971	0.03
THRa(NR)/C17.2-THRa-ChIP-Seq(GSE38347)/Homer	GGTCANYTGAGGWCA	1e-20	-46.2	0	788	0.0506	1163.7	0.036
TGA6(bZIP)/colamp-TGA6-DAP-Seq(GSE60143)/Homer	TGACGTCABC	1e-19	-45.81	0	1016	0.0653	1571.6	0.0486
Tcf3(HMG)/mES-Tcf3-ChIP-Seq(GSE11724)/Homer	ASWTCAAAGG	1e-19	-45.29	0	532	0.0342	726.9	0.0225
SUT1?/SacCer-Promoters/Homer	CCCCGCGC	1e-19	-44.02	0	10241	0.6582	20163.6	0.6233
Nrf2(bZIP)/Lymphoblast-Nrf2-ChIP-Seq(GSE37589)/Homer	HTGCTGAGTCAT	1e-18	-43.66	0	144	0.0093	127.7	0.0039
Jun-AP1(bZIP)/K562-cJun-ChIP-Seq(GSE31477)/Homer	GATGASTCATCN	1e-18	-43.62	0	401	0.0258	515.8	0.0159
Klf9(Zf)/GBM-Klf9-ChIP-Seq(GSE62211)/Homer	GCCACRCCCACY	1e-18	-43.37	0	1121	0.0721	1776.6	0.0549
ATHB5(HB)/colamp-ATHB5-DAP-Seq(GSE60143)/Homer	AATGATTG	1e-18	-43.31	0	1295	0.0832	2096.6	0.0648
HAT2(Homeobox)/colamp-HAT2-DAP-Seq(GSE60143)/Homer	CYAATSATTR	1e-18	-43.14	0	1213	0.078	1946.5	0.0602
bZIP50(bZIP)/colamp-bZIP50-DAP-Seq(GSE60143)/Homer	GATGACGTCA	1e-18	-42.47	0	1630	0.1048	2727.5	0.0843
Elf4(ETS)/BMDM-Elf4-ChIP-Seq(GSE88699)/Homer	ACTTCCKGKT	1e-17	-41.41	0	1974	0.1269	3388.6	0.1048
USF1(bHLH)/GM12878-Usf1-ChIP-Seq(GSE32465)/Homer	SGTCACGTGR	1e-17	-40.97	0	1024	0.0658	1614.6	0.0499
c-Jun-CRE(bZIP)/K562-cJun-ChIP-Seq(GSE31477)/Homer	ATGACGTCATCY	1e-17	-40.74	0	560	0.036	792.2	0.0245
NRF1(NRF)/MCF7-NRF1-ChIP-Seq(Unpublished)/Homer	CTGCGCATGCGC	1e-16	-39.11	0	684	0.044	1015.6	0.0314
CLOCK(bHLH)/Liver-Clock-ChIP-Seq(GSE39860)/Homer	GHCACGTG	1e-16	-38.17	0	1238	0.0796	2026.7	0.0627
Stat3+il21(Stat)/CD4-Stat3-ChIP-Seq(GSE19198)/Homer	SVYTTCCNGGAARB	1e-16	-37.25	0	1221	0.0785	2001.6	0.0619
Meis1(Homeobox)/MastCells-Meis1-ChIP-Seq(GSE48085)/Homer	VGCTGWCAVB	1e-16	-37.04	0	3053	0.1962	5527.8	0.1709
GATA20(C2C2gata)/colamp-GATA20-DAP-Seq(GSE60143)/Homer	TNGATCNDNM	1e-16	-36.97	0	3181	0.2045	5780.1	0.1787
BMYB(HTH)/Hela-BMYB-ChIP-Seq(GSE27030)/Homer	NHAACBGYYV	1e-15	-36.79	0	2619	0.1683	4679.8	0.1447
LEF1(HMG)/H1-LEF1-ChIP-Seq(GSE64758)/Homer	CCTTTGATST	1e-15	-36.42	0	1200	0.0771	1969	0.0609
Maz(Zf)/HepG2-Maz-ChIP-Seq(GSE31477)/Homer	GGGGGGGG	1e-15	-36.29	0	2839	0.1825	5115.1	0.1581
SeqBias: A/T bias	WWWWWWWWWW	1e-15	-36.25	0	12123	0.7792	24303.2	0.7513
Tcf4(HMG)/Hct116-Tcf4-ChIP-Seq(SRA012054)/Homer	ASATCAAAGGVA	1e-15	-36.14	0	832	0.0535	1295.3	0.04
HAT1(Homeobox)/col-HAT1-DAP-Seq(GSE60143)/Homer	SCAATCATTGNN	1e-15	-36.13	0	277	0.0178	339.9	0.0105
Bach1(bZIP)/K562-Bach1-ChIP-Seq(GSE31477)/Homer	AWWNTGCTGAGTCAT	1e-15	-35.95	0	137	0.0088	130.9	0.004
STAT1(Stat)/HelaS3-STAT1-ChIP-Seq(GSE12782)/Homer	NATTTCCNGGAAAT	1e-15	-35.16	0	522	0.0336	751.9	0.0232
bHLHE40(bHLH)/HepG2-BHLHE40-ChIP-Seq(GSE31477)/Homer	KCACGTGMCN	1e-14	-34.53	0	783	0.0503	1217	0.0376
Srebp2(bHLH)/HepG2-Srebp2-ChIP-Seq(GSE31477)/Homer	CGGTCACSCCAC	1e-14	-34.3	0	261	0.0168	319.2	0.0099
ATHB18(Homeobox)/colamp-ATHB18-DAP-Seq(GSE60143)/Homer	YCAATSATTG	1e-14	-34.11	0	277	0.0178	345.7	0.0107
EHF(ETS)/LoVo-EHF-ChIP-Seq(GSE49402)/Homer	AVCAGGAAGT	1e-14	-33.96	0	2224	0.1429	3940.8	0.1218
GATA15(C2C2gata)/col-GATA15-DAP-Seq(GSE60143)/Homer	KATGATCA	1e-14	-33.89	0	2035	0.1308	3575.4	0.1105
TGA1(bZIP)/colamp-TGA1-DAP-Seq(GSE60143)/Homer	TGACGTCAKC	1e-14	-33.55	0	717	0.0461	1103.1	0.0341
STAT4(Stat)/CD4-Stat4-ChIP-Seq(GSE22104)/Homer	NYTTCCWGGAAR	1e-14	-33.11	0	1478	0.095	2516.5	0.0778
FHY3(FAR1)/Arabidopsis-FHY3-ChIP-Seq(GSE30711)/Homer	HHCACGCGCBTN	1e-14	-32.61	0	952	0.0612	1536.5	0.0475
TFE3(bHLH)/MEF-TFE3-ChIP-Seq(GSE75757)/Homer	GTCACGTGACYV	1e-14	-32.29	0	223	0.0143	265.9	0.0082
ATHB6(Homeobox)/Arabidopsis-HB6-ChIP-Seq(GSE80564)/Homer	CAATNATTBN	1e-13	-32.22	0	975	0.0627	1581.3	0.0489
ANAC087(NAC)/col-ANAC087-DAP-Seq(GSE60143)/Homer	WVCKTGHNNNWCAMG	1e-13	-32.16	0	476	0.0306	685.8	0.0212
ATHB25(ZFHD)/colamp-ATHB25-DAP-Seq(GSE60143)/Homer	TAATTAVB	1e-13	-31.87	0	1578	0.1014	2717.6	0.084
RAR:RXR(NR),DR5/ES-RAR-ChIP-Seq(GSE56893)/Homer	RGGTCADNNAGAGGTCAV	1e-13	-31.22	0	94	0.006	80.2	0.0025
BIM1(bHLH)/colamp-BIM1-DAP-Seq(GSE60143)/Homer	NNNNNNVTCACGTGM	1e-13	-30.83	0	311	0.02	411	0.0127
Ronin(THAP)/ES-Thap11-ChIP-Seq(GSE51522)/Homer	RACTACAACTCCCAGVAKGC	1e-13	-30.59	0	115	0.0074	109.2	0.0034
KLF5(Zf)/LoVo-KLF5-ChIP-Seq(GSE49402)/Homer	DGGGYGKGGC	1e-13	-29.96	0	2911	0.1871	5332	0.1648
AT2G15740(C2H2)/col-AT2G15740-DAP-Seq(GSE60143)/Homer	DHNDWATCGATD	1e-12	-29.78	0	1078	0.0693	1790.9	0.0554
PIF5ox(bHLH)/Arabidopsis-PIF5ox-ChIP-Seq(GSE35062)/Homer	BCACGTGVDN	1e-12	-29.56	0	2013	0.1294	3577.7	0.1106
VDR(NR),DR3/GM10855-VDR+vitD-ChIP-Seq(GSE22484)/Homer	ARAGGTCANWGAGTTCANNN	1e-12	-29.46	0	397	0.0255	561.6	0.0174
GRE(NR),IR3/A549-GR-ChIP-Seq(GSE32465)/Homer	NRGVACABNVTGTYCY	1e-12	-29.34	0	275	0.0177	357.3	0.011
WRKY22(WRKY)/colamp-WRKY22-DAP-Seq(GSE60143)/Homer	WWAAAGTCAACK	1e-12	-28.87	0	880	0.0566	1429	0.0442
bHLH74(bHLH)/col-bHLH74-DAP-Seq(GSE60143)/Homer	DRATCACGTGAB	1e-12	-28.51	0	585	0.0376	895.8	0.0277
FUS3(ABI3VP1)/col-FUS3-DAP-Seq(GSE60143)/Homer	DNNWTNTGCATGKNN	1e-12	-28.34	0	1898	0.122	3368	0.1041
AMYB(HTH)/Testes-AMYB-ChIP-Seq(GSE44588)/Homer	TGGCAGTTGG	1e-12	-27.97	0	2721	0.1749	4982.1	0.154
ATHB23(ZFHD)/col-ATHB23-DAP-Seq(GSE60143)/Homer	HTAATTARNN	1e-12	-27.64	0	1232	0.0792	2097	0.0648
Bcl11a(Zf)/HSPC-BCL11A-ChIP-Seq(GSE104676)/Homer	TYTGACCASWRG	1e-11	-27.43	0	1149	0.0739	1942.9	0.0601
DREF/Drosophila-Promoters/Homer	AVYTATCGATAD	1e-11	-27.33	0	31	0.002	13.3	0.0004
SeqBias: CG bias	SSSSSSSSSS	1e-11	-27.31	0	12791	0.8221	25880	0.8
Klf4(Zf)/mES-Klf4-ChIP-Seq(GSE11431)/Homer	GCCACACCCA	1e-11	-26.83	0	891	0.0573	1464.1	0.0453
Tcf7(HMG)/GM12878-TCF7-ChIP-Seq(Encode)/Homer	CTTTGATGTGSB	1e-11	-26.46	0	593	0.0381	921.3	0.0285
WRKY42(WRKY)/colamp-WRKY42-DAP-Seq(GSE60143)/Homer	NAAAGTCAACGN	1e-11	-26.34	0	543	0.0349	832.6	0.0257
WRKY47(WRKY)/colamp-WRKY47-DAP-Seq(GSE60143)/Homer	WAAGTCAACGBT	1e-11	-26.24	0	398	0.0256	577.6	0.0179
GRE(NR),IR3/RAW264.7-GRE-ChIP-Seq(Unpublished)/Homer	VAGRACAKWCTGTYC	1e-11	-26.24	0	445	0.0286	659.1	0.0204
AT1G20910(ARID)/col-AT1G20910-DAP-Seq(GSE60143)/Homer	THAATTRAWN	1e-11	-26.04	0	2053	0.132	3694.5	0.1142
PGR(NR)/EndoStromal-PGR-ChIP-Seq(GSE69539)/Homer	AAGAACATWHTGTTC	1e-11	-25.94	0	411	0.0264	601.6	0.0186
ANAC016(NAC)/col-ANAC016-DAP-Seq(GSE60143)/Homer	WNCTTGNNNNNCAMG	1e-11	-25.88	0	1227	0.0789	2103.8	0.065
SPDEF(ETS)/VCaP-SPDEF-ChIP-Seq(SRA014231)/Homer	ASWTCCTGBT	1e-11	-25.62	0	1858	0.1194	3319	0.1026
KLF6(Zf)/PDAC-KLF6-ChIP-Seq(GSE64557)/Homer	MKGGGYGTGGCC	1e-10	-25.22	0	2319	0.1491	4225	0.1306
TCFL2(HMG)/K562-TCF7L2-ChIP-Seq(GSE29196)/Homer	ACWTCAAAGG	1e-10	-24.96	0	192	0.0123	238	0.0074
bZIP52(bZIP)/colamp-bZIP52-DAP-Seq(GSE60143)/Homer	NDNHCAGCTGTCANN	1e-10	-24.66	0	2234	0.1436	4065.2	0.1257
MYB70(MYB)/col-MYB70-DAP-Seq(GSE60143)/Homer	WTAACNGTTA	1e-10	-24.35	0	2258	0.1451	4116.7	0.1273
LXRE(NR),DR4/RAW-LXRb.biotin-ChIP-Seq(GSE21512)/Homer	RGGTTACTANAGGTCA	1e-10	-24.32	0	104	0.0067	105.9	0.0033
BIM3(bHLH)/col-BIM3-DAP-Seq(GSE60143)/Homer	TWVTCACGTGAB	1e-10	-23.98	0	333	0.0214	475.4	0.0147
TBP3(MYBrelated)/col-TBP3-DAP-Seq(GSE60143)/Homer	VYTAGGGCAN	1e-10	-23.82	0	1292	0.083	2246.1	0.0694
CUC2(NAC)/colamp-CUC2-DAP-Seq(GSE60143)/Homer	TRCKTGTNNNWCAMG	1e-10	-23.78	0	512	0.0329	791.8	0.0245
PAX5(Paired,Homeobox),condensed/GM12878-PAX5-ChIP-Seq(GSE32465)/Homer	GTCACGCTCSCTGM	1e-10	-23.51	0	254	0.0163	343.1	0.0106
WRKY11(WRKY)/col-WRKY11-DAP-Seq(GSE60143)/Homer	SCGTTGACTTTN	1e-10	-23.39	0	194	0.0125	245.5	0.0076
MYB116(MYB)/colamp-MYB116-DAP-Seq(GSE60143)/Homer	AGTTAGGCAN	1e-10	-23.23	0	1050	0.0675	1791.1	0.0554
BIM2(bHLH)/col-BIM2-DAP-Seq(GSE60143)/Homer	NNNNCACGTGNN	1e-10	-23.17	0	1711	0.11	3061.7	0.0946
MYB(HTH)/ERMYB-Myb-ChIPSeq(GSE22095)/Homer	GGCVGTTR	1e-10	-23.15	0	3103	0.1994	5807.4	0.1795
AT5G47660(Trihelix)/colamp-AT5G47660-DAP-Seq(GSE60143)/Homer	AWTTTTACCG	1e-09	-22.14	0	1961	0.126	3561.2	0.1101
ANAC057(NAC)/colamp-ANAC057-DAP-Seq(GSE60143)/Homer	DVCKTGNNNNNCAMG	1e-09	-22.1	0	1060	0.0681	1820.4	0.0563
O2(bZIP)/Corn-O2-ChIP-Seq(GSE63991)/Homer	GCTGACGTGGCA	1e-09	-22	0	307	0.0197	439.2	0.0136
AT3G25990(Trihelix)/colamp-AT3G25990-DAP-Seq(GSE60143)/Homer	TTAACCATAG	1e-09	-21.72	0	978	0.0629	1668.4	0.0516
ATHB34(ZFHD)/colamp-ATHB34-DAP-Seq(GSE60143)/Homer	TRATTARS	1e-09	-21.72	0	1045	0.0672	1795.2	0.0555
c-Myc(bHLH)/LNCAP-cMyc-ChIP-Seq(Unpublished)/Homer	VCCACGTG	1e-09	-21.53	0	1169	0.0751	2033.5	0.0629
WRKY45(WRKY)/col-WRKY45-DAP-Seq(GSE60143)/Homer	HNNNKTTGACTWWNH	1e-09	-21.31	0	577	0.0371	924.5	0.0286
E-box(bHLH)/Promoter/Homer	SSGGTCACGTGA	1e-09	-20.91	0	220	0.0141	296.9	0.0092
Pax7(Paired,Homeobox)/Myoblast-Pax7-ChIP-Seq(GSE25064)/Homer	TAATCAATTA	1e-09	-20.87	0	151	0.0097	184.6	0.0057
PBX2(Homeobox)/K562-PBX2-ChIP-Seq(Encode)/Homer	RTGATTKATRGN	1e-09	-20.84	0	1132	0.0728	1969.6	0.0609
MYB81(MYB)/col-MYB81-DAP-Seq(GSE60143)/Homer	NWAACSGWTWNN	1e-08	-20.6	0	2250	0.1446	4150.1	0.1283
HIF2a(bHLH)/785_O-HIF2a-ChIP-Seq(GSE34871)/Homer	GCACGTACCC	1e-08	-20.58	0	812	0.0522	1365.9	0.0422
AT5G56840(MYBrelated)/colamp-AT5G56840-DAP-Seq(GSE60143)/Homer	TGGATAAGGT	1e-08	-20.53	0	1611	0.1035	2897.9	0.0896
MYB57(MYB)/col-MYB57-DAP-Seq(GSE60143)/Homer	TTACCTAACT	1e-08	-20.36	0	669	0.043	1100.6	0.034
NFE2L2(bZIP)/HepG2-NFE2L2-ChIP-Seq(Encode)/Homer	AWWWTGCTGAGTCAT	1e-08	-20.23	0	158	0.0102	197	0.0061
PAX5(Paired,Homeobox)/GM12878-PAX5-ChIP-Seq(GSE32465)/Homer	GCAGCCAAGCRTGACH	1e-08	-19.84	0	749	0.0481	1253.8	0.0388
ATHB15(HB)/col-ATHB15-DAP-Seq(GSE60143)/Homer	GYAATSATTA	1e-08	-19.55	0	457	0.0294	717.9	0.0222
At3g60580(C2H2)/col-At3g60580-DAP-Seq(GSE60143)/Homer	WTTYTACT	1e-08	-19.48	0	8132	0.5227	16156.4	0.4994
ANAC092(NAC)/colamp-ANAC092-DAP-Seq(GSE60143)/Homer	WRCKTGWNNNWCAMG	1e-08	-18.9	0	600	0.0386	983.2	0.0304
ATHB24(ZFHD)/colamp-ATHB24-DAP-Seq(GSE60143)/Homer	TAATTAAS	1e-08	-18.74	0	972	0.0625	1684.3	0.0521
GTL1(Trihelix)/colamp-GTL1-DAP-Seq(GSE60143)/Homer	WWTTTACCKY	1e-08	-18.55	0	1474	0.0947	2654.3	0.0821
SeqBias: polyA-repeat	AAAAAAAAAA	1e-08	-18.54	0	15102	0.9707	31131.4	0.9624
TGA4(bZIP)/colamp-TGA4-DAP-Seq(GSE60143)/Homer	RTGACGTCAKCW	1e-07	-18.42	0	491	0.0316	786	0.0243
Tgif1(Homeobox)/mES-Tgif1-ChIP-Seq(GSE55404)/Homer	YTGWCADY	1e-07	-18.41	0	4855	0.3121	9428.7	0.2915
At4g36780(BZR)/col-At4g36780-DAP-Seq(GSE60143)/Homer	NNNNNNCACGTGNNN	1e-07	-18.37	0	686	0.0441	1147.5	0.0355
ZNF416(Zf)/HEK293-ZNF416.GFP-ChIP-Seq(GSE58341)/Homer	WDNCTGGGCA	1e-07	-18.05	0	2290	0.1472	4266.4	0.1319
WRKY8(WRKY)/colamp-WRKY8-DAP-Seq(GSE60143)/Homer	CGTTGACTTT	1e-07	-18.04	0	189	0.0121	255.8	0.0079
PIF4(bHLH)/Seedling-PIF4-ChIP-Seq(GSE35315)/Homer	NNBCACGTGN	1e-07	-17.79	0	2357	0.1515	4403.4	0.1361
ABF1/SacCer-Promoters/Homer	CGTRNAAARTGA	1e-07	-17.74	0	421	0.0271	663.7	0.0205
CRE(bZIP)/Promoter/Homer	CSGTGACGTCAC	1e-07	-17.3	0	545	0.035	893.4	0.0276
NFkB-p65-Rel(RHD)/ThioMac-LPS-Expression(GSE23622)/Homer	GGAAATTCCC	1e-07	-17.2	0	89	0.0057	98.8	0.0031
ATHB33(ZFHD)/col-ATHB33-DAP-Seq(GSE60143)/Homer	NGTRATTAAK	1e-07	-16.98	0	1761	0.1132	3237	0.1001
Reverb(NR),DR2/RAW-Reverba.biotin-ChIP-Seq(GSE45914)/Homer	GTRGGTCASTGGGTCA	1e-07	-16.86	0	242	0.0156	350.4	0.0108
ANAC094(NAC)/col-ANAC094-DAP-Seq(GSE60143)/Homer	DVCGTRNNNNNYACG	1e-07	-16.81	0	668	0.0429	1126.6	0.0348
BOS1(MYB)/col-BOS1-DAP-Seq(GSE60143)/Homer	NNRCCTAACT	1e-07	-16.66	0	1397	0.0898	2527.4	0.0781
WT1(Zf)/Kidney-WT1-ChIP-Seq(GSE90016)/Homer	MCTCCCMCRCAB	1e-07	-16.48	0	1156	0.0743	2061.7	0.0637
TEAD4(TEA)/Tropoblast-Tead4-ChIP-Seq(GSE37350)/Homer	CCWGGAATGY	1e-07	-16.43	0	1228	0.0789	2201.1	0.068
RARg(NR)/ES-RARg-ChIP-Seq(GSE30538)/Homer	AGGTCAAGGTCA	1e-07	-16.27	0	219	0.0141	313.1	0.0097
ELT-3(Gata)/cElegans-L1-ELT3-ChIP-Seq(modEncode)/Homer	AWTGATAAGA	1e-07	-16.24	0	580	0.0373	966.5	0.0299
MYB77(MYB)/col-MYB77-DAP-Seq(GSE60143)/Homer	NYAACBGYMC	1e-07	-16.14	0	2189	0.1407	4095	0.1266
CAMTA1(CAMTA)/col-CAMTA1-DAP-Seq(GSE60143)/Homer	WWAACGCGTT	1e-06	-16.05	0	998	0.0641	1761.9	0.0545
CUC3(NAC)/col-CUC3-DAP-Seq(GSE60143)/Homer	TRCKTGWNNNACAMG	1e-06	-15.92	0	493	0.0317	807	0.0249
Srebp1a(bHLH)/HepG2-Srebp1a-ChIP-Seq(GSE31477)/Homer	RTCACSCCAY	1e-06	-15.62	0	319	0.0205	492.9	0.0152
ATHB6(Homeobox)/col-ATHB6-DAP-Seq(GSE60143)/Homer	AATGATTG	1e-06	-15.57	0	1567	0.1007	2874.4	0.0889
ANAC050(NAC)/colamp-ANAC050-DAP-Seq(GSE60143)/Homer	WNCTTGNNNNNCAAG	1e-06	-15.49	0	796	0.0512	1380.4	0.0427
JunD(bZIP)/K562-JunD-ChIP-Seq/Homer	ATGACGTCATCN	1e-06	-15.38	0	194	0.0125	275	0.0085
TGA2(bZIP)/colamp-TGA2-DAP-Seq(GSE60143)/Homer	ACGTCAYCHH	1e-06	-15.36	0	901	0.0579	1582.8	0.0489
ELF5(ETS)/T47D-ELF5-ChIP-Seq(GSE30407)/Homer	ACVAGGAAGT	1e-06	-15.29	0	1281	0.0823	2318.2	0.0717
ANAC045(NAC)/col-ANAC045-DAP-Seq(GSE60143)/Homer	DNCKTVNNNNNNAMG	1e-06	-14.81	0	2931	0.1884	5602.7	0.1732
ANAC017(NAC)/colamp-ANAC017-DAP-Seq(GSE60143)/Homer	TMCTTGNNNNNCAAG	1e-06	-14.72	0	197	0.0127	282.3	0.0087
bZIP18(bZIP)/colamp-bZIP18-DAP-Seq(GSE60143)/Homer	KGMCAGCTND	1e-06	-14.66	0	9186	0.5904	18468.9	0.5709
Replumless(BLH)/Arabidopsis-RPL.GFP-ChIP-Seq(GSE78727)/Homer	HGTCWHATCA	1e-06	-14.58	0	1530	0.0983	2815.3	0.087
Mef2d(MADS)/Retina-Mef2d-ChIP-Seq(GSE61391)/Homer	GCTATTTTTAGC	1e-06	-14.58	0	214	0.0138	312.5	0.0097
BPC6(BBRBPC)/col-BPC6-DAP-Seq(GSE60143)/Homer	YTYTCTCTCTCTCTA	1e-06	-14.52	0	193	0.0124	276	0.0085
HY5(bZIP)/colamp-HY5-DAP-Seq(GSE60143)/Homer	RRTSACGTSD	1e-06	-14.51	0	1393	0.0895	2547.3	0.0787
E-box/Drosophila-Promoters/Homer	AACAGCTGTTHN	1e-06	-14.48	0	418	0.0269	679.6	0.021
CEBP:CEBP(bZIP)/MEF-Chop-ChIP-Seq(GSE35681)/Homer	NTNATGCAAYMNNHTGMAAY	1e-06	-14.36	0	222	0.0143	327.3	0.0101
Mef2c(MADS)/GM12878-Mef2c-ChIP-Seq(GSE32465)/Homer	DCYAAAAATAGM	1e-06	-14.31	0	501	0.0322	834.2	0.0258
MYB119(MYB)/colamp-MYB119-DAP-Seq(GSE60143)/Homer	YRACCGTTACDD	1e-06	-14.3	0	426	0.0274	695.4	0.0215
ELF3(ETS)/PDAC-ELF3-ChIP-Seq(GSE64557)/Homer	ANCAGGAAGT	1e-06	-14.13	0	1192	0.0766	2159.4	0.0668
MYB73(MYB)/col-MYB73-DAP-Seq(GSE60143)/Homer	NNNNHAACNGHHDHN	1e-06	-13.83	0	2867	0.1843	5492.9	0.1698
WRKY21(WRKY)/colamp-WRKY21-DAP-Seq(GSE60143)/Homer	DCGTTGACTTTT	1e-05	-13.55	0	159	0.0102	222.8	0.0069
GFY(?)/Promoter/Homer	ACTACAATTCCC	1e-05	-13.4	0	148	0.0095	204.4	0.0063
BMAL1(bHLH)/Liver-Bmal1-ChIP-Seq(GSE39860)/Homer	GNCACGTG	1e-05	-13.14	0	3388	0.2178	6558.6	0.2027
PRDM15(Zf)/ESC-Prdm15-ChIP-Seq(GSE73694)/Homer	YCCDNTCCAGGTTTT	1e-05	-12.98	0	1631	0.1048	3038.1	0.0939
PHV(HB)/col-PHV-DAP-Seq(GSE60143)/Homer	RTAATSATTA	1e-05	-12.83	0	526	0.0338	893.2	0.0276
TGA5(bZIP)/col-TGA5-DAP-Seq(GSE60143)/Homer	NNGATGACGTCATCN	1e-05	-12.72	0	194	0.0125	286.4	0.0089
Hoxb4(Homeobox)/ES-Hoxb4-ChIP-Seq(GSE34014)/Homer	TGATTRATGGCY	1e-05	-12.64	0	282	0.0181	443.9	0.0137
MafK(bZIP)/C2C12-MafK-ChIP-Seq(GSE36030)/Homer	GCTGASTCAGCA	1e-05	-12.63	0	408	0.0262	675	0.0209
Brachyury(T-box)/Mesoendoderm-Brachyury-ChIP-exo(GSE54963)/Homer	ANTTMRCASBNNNGTGYKAAN	1e-05	-12.53	0	435	0.028	725.1	0.0224
ANAC083(NAC)/col-ANAC083-DAP-Seq(GSE60143)/Homer	CKTRWNNNWYAMGTA	1e-05	-12.49	0	944	0.0607	1697.9	0.0525
Six4(Homeobox)/MCF7-SIX4-ChIP-Seq(Encode)/Homer	TGWAAYCTGABACCB	1e-05	-12.47	0	80	0.0051	97	0.003
AT3G42860(zfGRF)/col-AT3G42860-DAP-Seq(GSE60143)/Homer	CGTTGACTTN	1e-05	-12.35	0	362	0.0233	591.9	0.0183
Foxh1(Forkhead)/hESC-FOXH1-ChIP-Seq(GSE29422)/Homer	NNTGTGGATTSS	1e-05	-12.26	0	923	0.0593	1659.4	0.0513
ARE(NR)/LNCAP-AR-ChIP-Seq(GSE27824)/Homer	RGRACASNSTGTYCYB	1e-05	-12.22	0	494	0.0318	838.5	0.0259
E-box/Arabidopsis-Promoters/Homer	GCCACGTG	1e-05	-12.18	0	956	0.0614	1724.7	0.0533
Lhx3(Homeobox)/Neuron-Lhx3-ChIP-Seq(GSE31456)/Homer	ADBTAATTAR	1e-05	-12.06	0	2285	0.1469	4357.3	0.1347
bHLH34(bHLH)/colamp-bHLH34-DAP-Seq(GSE60143)/Homer	HGWGRHWGACACGTG	1e-05	-12.05	0	612	0.0393	1063.9	0.0329
bZIP69(bZIP)/col-bZIP69-DAP-Seq(GSE60143)/Homer	GACAGCTGKCAW	1e-05	-12.05	0	208	0.0134	314.4	0.0097
AR-halfsite(NR)/LNCaP-AR-ChIP-Seq(GSE27824)/Homer	CCAGGAACAG	1e-05	-12.02	0	6737	0.433	13446.3	0.4157
AT5G61620(MYBrelated)/colamp-AT5G61620-DAP-Seq(GSE60143)/Homer	CTTATCCA	1e-05	-11.78	0	1821	0.117	3435.4	0.1062
FAR1(FAR1)/col-FAR1-DAP-Seq(GSE60143)/Homer	TKNNNYYCACGCGCY	1e-05	-11.71	0	360	0.0231	592.1	0.0183
GT2(Trihelix)/colamp-GT2-DAP-Seq(GSE60143)/Homer	AMGGTAAAWWWN	1e-05	-11.68	0	1376	0.0884	2554.3	0.079
TGA10(bZIP)/colamp-TGA10-DAP-Seq(GSE60143)/Homer	ATGACGTC	0.0001	-11.5	0	877	0.0564	1579.7	0.0488
p63(p53)/Keratinocyte-p63-ChIP-Seq(GSE17611)/Homer	NNDRCATGYCYNRRCATGYH	0.0001	-11.34	0	613	0.0394	1072.4	0.0332
EMB1789(C3H)/col-EMB1789-DAP-Seq(GSE60143)/Homer	TWTTTACCGYND	0.0001	-11.29	0	505	0.0325	867	0.0268
ERE(NR),IR3/MCF7-ERa-ChIP-Seq(Unpublished)/Homer	VAGGTCACNSTGACC	0.0001	-11.04	0.0001	462	0.0297	788.1	0.0244
Pdx1(Homeobox)/Islet-Pdx1-ChIP-Seq(SRA008281)/Homer	YCATYAATCA	0.0001	-11	0.0001	1209	0.0777	2235.6	0.0691
Egr1(Zf)/K562-Egr1-ChIP-Seq(GSE32465)/Homer	TGCGTGGGYG	0.0001	-10.99	0.0001	1589	0.1021	2987.1	0.0923
At4g18890(BZR)/col-At4g18890-DAP-Seq(GSE60143)/Homer	NDBRCACGTGYR	0.0001	-10.75	0.0001	392	0.0252	659.5	0.0204
MYB118(MYB)/colamp-MYB118-DAP-Seq(GSE60143)/Homer	TAWCCGTTAC	0.0001	-10.45	0.0001	412	0.0265	699.7	0.0216
CUC1(NAC)/col-CUC1-DAP-Seq(GSE60143)/Homer	TACTTGTNNNACAAG	0.0001	-10.42	0.0001	595	0.0382	1047.1	0.0324
ANAC013(NAC)/col-ANAC013-DAP-Seq(GSE60143)/Homer	CTTGNNNNNCAAGNA	0.0001	-10.33	0.0001	607	0.039	1071.8	0.0331
Nanog(Homeobox)/mES-Nanog-ChIP-Seq(GSE11724)/Homer	RGCCATTAAC	0.0001	-10.31	0.0001	6215	0.3995	12417.1	0.3839
TGA3(bZIP)/colamp-TGA3-DAP-Seq(GSE60143)/Homer	WTGATGACGTCATCW	0.0001	-10.09	0.0001	134	0.0086	194.8	0.006
MYB98(MYB)/col-MYB98-DAP-Seq(GSE60143)/Homer	NWDCCGTTAC	0.0001	-9.911	0.0002	401	0.0258	683.4	0.0211
Gfi1b(Zf)/HPC7-Gfi1b-ChIP-Seq(GSE22178)/Homer	MAATCACTGC	0.0001	-9.796	0.0002	992	0.0638	1826.4	0.0565
CELF2(RRM)/JSL1-CELF2-CLIP-Seq(GSE71264)/Homer	RGTGTCAG	0.0001	-9.732	0.0002	575	0.037	1016.3	0.0314
Nkx6.1(Homeobox)/Islet-Nkx6.1-ChIP-Seq(GSE40975)/Homer	GKTAATGR	0.0001	-9.669	0.0002	3446	0.2215	6757.5	0.2089
ZNF467(Zf)/HEK293-ZNF467.GFP-ChIP-Seq(GSE58341)/Homer	TGGGGAAGGGCM	0.0001	-9.628	0.0002	1459	0.0938	2752.3	0.0851
VIP1(bZIP)/col-VIP1-DAP-Seq(GSE60143)/Homer	NTTGACAGCTGTCAN	0.0001	-9.567	0.0002	313	0.0201	521.1	0.0161
At5g47390(MYBrelated)/col-At5g47390-DAP-Seq(GSE60143)/Homer	CTTATCCA	0.0001	-9.517	0.0002	1582	0.1017	2999.1	0.0927
SeqBias: GCW-triplet	GCWGCWGCWGCW	0.0001	-9.479	0.0002	15552	0.9996	32303.8	0.9986
GATA:SCL(Zf,bHLH)/Ter119-SCL-ChIP-Seq(GSE18720)/Homer	CRGCTGBNGNSNNSAGATAA	0.0001	-9.441	0.0002	177	0.0114	274	0.0085
ANAC020(NAC)/col-ANAC020-DAP-Seq(GSE60143)/Homer	DVCKTGHNNNDCAAG	0.0001	-9.42	0.0002	830	0.0533	1514.4	0.0468
GATA(Zf),IR3/iTreg-Gata3-ChIP-Seq(GSE20898)/Homer	NNNNNBAGATAWYATCTVHN	0.0001	-9.396	0.0002	183	0.0118	284.8	0.0088
MYB65(MYB)/colamp-MYB65-DAP-Seq(GSE60143)/Homer	RACNGTTA	0.0001	-9.339	0.0003	1723	0.1107	3284.8	0.1015
HLH-1(bHLH)/cElegans-Embryo-HLH1-ChIP-Seq(modEncode)/Homer	RACAGCTGTTBH	0.0001	-9.271	0.0003	1257	0.0808	2357.4	0.0729
WRKY17(WRKY)/colamp-WRKY17-DAP-Seq(GSE60143)/Homer	GCGTTGACTTTT	0.0001	-9.27	0.0003	18	0.0012	13.4	0.0004
SPL11(SBP)/col100-SPL11-DAP-Seq(GSE60143)/Homer	YTGTACTTBH	0.0001	-9.233	0.0003	914	0.0587	1681.5	0.052
VND2(NAC)/col-VND2-DAP-Seq(GSE60143)/Homer	DNCKTNNNNNNNAAG	0.001	-9.043	0.0003	1192	0.0766	2232.3	0.069
SeqBias: G/A bias	RRRRRRRRRR	0.001	-8.934	0.0004	15547	0.9993	32288.4	0.9981
WRKY46(WRKY)/colamp-WRKY46-DAP-Seq(GSE60143)/Homer	AAAGTCAACGSN	0.001	-8.928	0.0004	77	0.0049	102.4	0.0032
WRKY30(WRKY)/colamp-WRKY30-DAP-Seq(GSE60143)/Homer	CGTTGACTTN	0.001	-8.917	0.0004	382	0.0246	656.6	0.0203
KLF10(Zf)/HEK293-KLF10.GFP-ChIP-Seq(GSE58341)/Homer	GGGGGTGTGTCC	0.001	-8.908	0.0004	1838	0.1181	3523.7	0.1089
ATHB13(Homeobox)/col-ATHB13-DAP-Seq(GSE60143)/Homer	CAATAATT	0.001	-8.604	0.0005	1288	0.0828	2430.5	0.0751
n-Myc(bHLH)/mES-nMyc-ChIP-Seq(GSE11431)/Homer	VRCCACGTGG	0.001	-8.598	0.0005	1409	0.0906	2671.9	0.0826
TGA9(bZIP)/colamp-TGA9-DAP-Seq(GSE60143)/Homer	VTGACGTC	0.001	-8.587	0.0005	1733	0.1114	3319.2	0.1026
M1BP(Zf)/S2R+-M1BP-ChIP-Seq(GSE49842)/Homer	CAGTGTGACCGT	0.001	-8.54	0.0006	377	0.0242	650.9	0.0201
At1g78700(BZR)/col-At1g78700-DAP-Seq(GSE60143)/Homer	NNNNCACGTGNNNNN	0.001	-8.532	0.0006	647	0.0416	1169.6	0.0362
MafF(bZIP)/HepG2-MafF-ChIP-Seq(GSE31477)/Homer	HWWGTCAGCAWWTTT	0.001	-8.421	0.0006	341	0.0219	583.3	0.018
MafB(bZIP)/BMM-Mafb-ChIP-Seq(GSE75722)/Homer	WNTGCTGASTCAGCANWTTY	0.001	-8.369	0.0007	648	0.0417	1173.3	0.0363
CTCF(Zf)/CD4+-CTCF-ChIP-Seq(Barski_et_al.)/Homer	AYAGTGCCMYCTRGTGGCCA	0.001	-8.365	0.0007	265	0.017	441.5	0.0136
E2F4(E2F)/K562-E2F4-ChIP-Seq(GSE31477)/Homer	GGCGGGAAAH	0.001	-8.331	0.0007	922	0.0593	1710.5	0.0529
ABF1(bZIP)/Arabidopsis-ABF1-ChIP-Seq(GSE80564)/Homer	CACGTGGC	0.001	-8.263	0.0007	1558	0.1001	2975.5	0.092
ZNF264(Zf)/HEK293-ZNF264.GFP-ChIP-Seq(GSE58341)/Homer	RGGGCACTAACY	0.001	-8.256	0.0007	1149	0.0739	2160.2	0.0668
AtIDD11(C2H2)/colamp-AtIDD11-DAP-Seq(GSE60143)/Homer	TTTGTCGTTT	0.001	-8.255	0.0007	541	0.0348	967.9	0.0299
AGL63(MADS)/col-AGL63-DAP-Seq(GSE60143)/Homer	TTCCAAWWWTGG	0.001	-8.229	0.0007	907	0.0583	1682.3	0.052
E2FA(E2FDP)/colamp-E2FA-DAP-Seq(GSE60143)/Homer	WWTGGCGCCAWWWNN	0.001	-8.208	0.0008	708	0.0455	1292.4	0.04
bZIP3(bZIP)/col-bZIP3-DAP-Seq(GSE60143)/Homer	DWKNHSACGTGGCAD	0.001	-8.111	0.0008	785	0.0505	1444.2	0.0446
AT1G72740(MYBrelated)/colamp-AT1G72740-DAP-Seq(GSE60143)/Homer	NNWWAMCCTAAHWNN	0.001	-8.111	0.0008	1514	0.0973	2890.2	0.0893
SMB(NAC)/colamp-SMB-DAP-Seq(GSE60143)/Homer	CTTVNNNNDBAAGHW	0.001	-8.05	0.0009	1189	0.0764	2243.4	0.0693
VND4(NAC)/colamp-VND4-DAP-Seq(GSE60143)/Homer	WRCTTGWANWWCAAG	0.001	-8.044	0.0009	937	0.0602	1744.7	0.0539
SPL9(SBP)/colamp-SPL9-DAP-Seq(GSE60143)/Homer	BTGTACTT	0.001	-8.042	0.0009	3263	0.2097	6428.7	0.1987
NPAS2(bHLH)/Liver-NPAS2-ChIP-Seq(GSE39860)/Homer	KCCACGTGAC	0.001	-7.956	0.001	2039	0.1311	3948.3	0.1221
Zfp809(Zf)/ES-Zfp809-ChIP-Seq(GSE70799)/Homer	GGGGCTYGKCTGGGA	0.001	-7.9	0.001	329	0.0211	565.5	0.0175
IRF8(IRF)/BMDM-IRF8-ChIP-Seq(GSE77884)/Homer	GRAASTGAAAST	0.001	-7.801	0.0011	460	0.0296	816.2	0.0252
HOXA2(Homeobox)/mES-Hoxa2-ChIP-Seq(Donaldson_et_al.)/Homer	GYCATCMATCAT	0.001	-7.793	0.0011	145	0.0093	225	0.007
Unknown5/Drosophila-Promoters/Homer	GCTGATAASV	0.001	-7.762	0.0012	815	0.0524	1508.9	0.0466
LBD23(LOBAS2)/colamp-LBD23-DAP-Seq(GSE60143)/Homer	GCGNAWWWTNCGCYW	0.001	-7.683	0.0012	1600	0.1028	3071.1	0.0949
GFY-Staf(?,Zf)/Promoter/Homer	RACTACAATTCCCAGAAKGC	0.001	-7.593	0.0014	136	0.0087	210.8	0.0065
PLT3(AP2EREBP)/col-PLT3-DAP-Seq(GSE60143)/Homer	GCACGNWTHYCGAGG	0.001	-7.576	0.0014	98	0.0063	143.6	0.0044
ANAC028(NAC)/col-ANAC028-DAP-Seq(GSE60143)/Homer	WRCTTGNNNNNCAAG	0.001	-7.573	0.0014	917	0.0589	1712.3	0.0529
VND6(NAC)/col-VND6-DAP-Seq(GSE60143)/Homer	DCTTNHTTTTYAMGY	0.001	-7.558	0.0014	1458	0.0937	2789.3	0.0862
Egr2(Zf)/Thymocytes-Egr2-ChIP-Seq(GSE34254)/Homer	NGCGTGGGCGGR	0.001	-7.488	0.0015	453	0.0291	806.1	0.0249
Rbpj1(?)/Panc1-Rbpj1-ChIP-Seq(GSE47459)/Homer	HTTTCCCASG	0.001	-7.446	0.0016	2185	0.1404	4255.2	0.1315
MYB101(MYB)/colamp-MYB101-DAP-Seq(GSE60143)/Homer	TAACNRMY	0.001	-7.445	0.0016	3105	0.1996	6123.3	0.1893
MYB33(MYB)/col-MYB33-DAP-Seq(GSE60143)/Homer	DDTYNGTTAN	0.001	-7.423	0.0016	2550	0.1639	4995.3	0.1544
bHLH18(bHLH)/col-bHLH18-DAP-Seq(GSE60143)/Homer	CACGTGTTYCACGTG	0.001	-7.378	0.0017	36	0.0023	41.2	0.0013
Mef2b(MADS)/HEK293-Mef2b.V5-ChIP-Seq(GSE67450)/Homer	GCTATTTTTGGM	0.001	-7.215	0.0019	909	0.0584	1702.7	0.0526
TEAD2(TEA)/Py2T-Tead2-ChIP-Seq(GSE55709)/Homer	CCWGGAATGY	0.001	-7.164	0.002	724	0.0465	1338.8	0.0414
ANAC103(NAC)/col-ANAC103-DAP-Seq(GSE60143)/Homer	AACTTGNWNWNCAAG	0.001	-7.077	0.0022	511	0.0328	923.1	0.0285
AGL15(MADS)/col-AGL15-DAP-Seq(GSE60143)/Homer	TTTCCHWATWDGGAA	0.001	-7.066	0.0022	175	0.0112	284.2	0.0088
AT1G19040(NAC)/col-AT1G19040-DAP-Seq(GSE60143)/Homer	CTTGNDNHNCAAGYW	0.001	-7.003	0.0024	184	0.0118	301.3	0.0093
GRF9(GRF)/colamp-GRF9-DAP-Seq(GSE60143)/Homer	NWCTGACANNNNNNN	0.001	-6.93	0.0025	1447	0.093	2780.7	0.086
RKD2(RWPRK)/colamp-RKD2-DAP-Seq(GSE60143)/Homer	GACKTTTCRDCTTCC	0.01	-6.897	0.0026	927	0.0596	1743.7	0.0539
FRS9(ND)/col-FRS9-DAP-Seq(GSE60143)/Homer	RGAGAGAGAAAG	0.01	-6.825	0.0028	496	0.0319	897.6	0.0277
Unknown1(NR/Ini-like)/Drosophila-Promoters/Homer	MYGGTCACACTG	0.01	-6.771	0.003	305	0.0196	530.7	0.0164
STAT6(Stat)/Macrophage-Stat6-ChIP-Seq(GSE38377)/Homer	TTCCKNAGAA	0.01	-6.698	0.0032	724	0.0465	1345.8	0.0416
VND3(NAC)/colamp-VND3-DAP-Seq(GSE60143)/Homer	TRCTTGWDNHWCAAG	0.01	-6.683	0.0032	854	0.0549	1602.4	0.0495
ATHB21(HB)/colamp-ATHB21-DAP-Seq(GSE60143)/Homer	YCAATWAT	0.01	-6.668	0.0033	575	0.037	1053.1	0.0326
HAT5(Homeobox)/colamp-HAT5-DAP-Seq(GSE60143)/Homer	DCAATWATTG	0.01	-6.643	0.0033	162	0.0104	263.4	0.0081
SpiB(ETS)/OCILY3-SPIB-ChIP-Seq(GSE56857)/Homer	AAAGRGGAAGTG	0.01	-6.601	0.0035	346	0.0222	610.7	0.0189
WRKY7(WRKY)/colamp-WRKY7-DAP-Seq(GSE60143)/Homer	AAAAGTCAACGSHWD	0.01	-6.488	0.0039	4	0.0003	0	0
Mef2a(MADS)/HL1-Mef2a.biotin-ChIP-Seq(GSE21529)/Homer	CYAAAAATAG	0.01	-6.338	0.0045	445	0.0286	804.5	0.0249
REB1/SacCer-Promoters/Homer	KCCGGGTAAYRR	0.01	-6.277	0.0048	234	0.015	400.6	0.0124
ETS:E-box(ETS,bHLH)/HPC7-Scl-ChIP-Seq(GSE22178)/Homer	AGGAARCAGCTG	0.01	-6.026	0.0061	127	0.0082	203.9	0.0063
ANAC053(NAC)/colamp-ANAC053-DAP-Seq(GSE60143)/Homer	TDCTTGNNNNNCAAG	0.01	-6.017	0.0061	716	0.046	1340.9	0.0415
bHLH157(bHLH)/col-bHLH157-DAP-Seq(GSE60143)/Homer	KACACGTCTCTY	0.01	-5.999	0.0062	339	0.0218	603.3	0.0187
PU.1(ETS)/ThioMac-PU.1-ChIP-Seq(GSE21512)/Homer	AGAGGAAGTG	0.01	-5.995	0.0062	783	0.0503	1473.9	0.0456
TEAD1(TEAD)/HepG2-TEAD1-ChIP-Seq(Encode)/Homer	CYRCATTCCA	0.01	-5.96	0.0064	1299	0.0835	2504.7	0.0774
HOXA1(Homeobox)/mES-Hoxa1-ChIP-Seq(SRP084292)/Homer	TGATKGATGR	0.01	-5.928	0.0066	323	0.0208	573.4	0.0177
Lhx2(Homeobox)/HFSC-Lhx2-ChIP-Seq(GSE48068)/Homer	TAATTAGN	0.01	-5.912	0.0067	1291	0.083	2489.4	0.077
GFX(?)/Promoter/Homer	ATTCTCGCGAGA	0.01	-5.791	0.0076	39	0.0025	50.7	0.0016
AIL7(AP2EREBP)/colamp-AIL7-DAP-Seq(GSE60143)/Homer	KCACRAWTYYCGAGG	0.01	-5.748	0.0079	612	0.0393	1139.9	0.0352
Zic(Zf)/Cerebellum-ZIC1.2-ChIP-Seq(GSE60731)/Homer	CCTGCTGAGH	0.01	-5.704	0.0082	1470	0.0945	2854.4	0.0882
MafA(bZIP)/Islet-MafA-ChIP-Seq(GSE30298)/Homer	TGCTGACTCA	0.01	-5.682	0.0084	1363	0.0876	2639.8	0.0816
bHLH80(bHLH)/col-bHLH80-DAP-Seq(GSE60143)/Homer	NNNNDCAASTTGHNN	0.01	-5.651	0.0086	1384	0.089	2682.6	0.0829
ZNF711(Zf)/SHSY5Y-ZNF711-ChIP-Seq(GSE20673)/Homer	AGGCCTAG	0.01	-5.626	0.0088	3137	0.2016	6245.2	0.1931
GBF3(bZIP)/Arabidopsis-GBF3-ChIP-Seq(GSE80564)/Homer	TGCCACGTSAYC	0.01	-5.624	0.0088	648	0.0417	1212.9	0.0375
MYNN(Zf)/HEK293-MYNN.eGFP-ChIP-Seq(Encode)/Homer	TTCAAAWTAAAAGTC	0.01	-5.61	0.0089	330	0.0212	590.9	0.0183
Hand2(bHLH)/Mesoderm-Hand2-ChIP-Seq(GSE61475)/Homer	TGACANARRCCAGRC	0.01	-5.576	0.0092	683	0.0439	1282.3	0.0396
PU.1:IRF8(ETS:IRF)/pDC-Irf8-ChIP-Seq(GSE66899)/Homer	GGAAGTGAAAST	0.01	-5.428	0.0106	253	0.0163	444.5	0.0137
NPAS(bHLH)/Liver-NPAS-ChIP-Seq(GSE39860)/Homer	NVCACGTG	0.01	-5.419	0.0107	3002	0.193	5976.1	0.1847
E2F(E2F)/Hela-CellCycle-Expression/Homer	TTSGCGCGAAAA	0.01	-5.395	0.0109	99	0.0064	156.4	0.0048
AtGRF6(GRF)/col-AtGRF6-DAP-Seq(GSE60143)/Homer	NTGTCAGADNNNNNN	0.01	-5.391	0.011	1834	0.1179	3598.4	0.1112
Trl(Zf)/S2-GAGAfactor-ChIP-Seq(GSE40646)/Homer	RGAGAGAG	0.01	-5.375	0.0111	4388	0.282	8821.2	0.2727
Pax8(Paired,Homeobox)/Thyroid-Pax8-ChIP-Seq(GSE26938)/Homer	GTCATGCHTGRCTGS	0.01	-5.351	0.0114	584	0.0375	1091	0.0337
DAG2(C2C2dof)/col-DAG2-DAP-Seq(GSE60143)/Homer	WWTTHACTTTTT	0.01	-5.226	0.0128	2307	0.1483	4564.7	0.1411
E2F7(E2F)/Hela-E2F7-ChIP-Seq(GSE32673)/Homer	VDTTTCCCGCCA	0.01	-5.122	0.0142	231	0.0148	405.4	0.0125
ZNF322(Zf)/HEK293-ZNF322.GFP-ChIP-Seq(GSE58341)/Homer	GAGCCTGGTACTGWGCCTGR	0.01	-5.088	0.0146	457	0.0294	844.6	0.0261
ZBTB33(Zf)/GM12878-ZBTB33-ChIP-Seq(GSE32465)/Homer	GGVTCTCGCGAGAAC	0.01	-5.033	0.0154	100	0.0064	160.5	0.005
ZNF528(Zf)/HEK293-ZNF528.GFP-ChIP-Seq(GSE58341)/Homer	AGAAATGACTTCCCT	0.01	-5.033	0.0154	13	0.0008	13	0.0004
LIN-39(Homeobox)/cElegans.L3-LIN39-ChIP-Seq(modEncode)/Homer	ATGATTRATG	0.01	-5.011	0.0157	1403	0.0902	2736.3	0.0846
SND2(NAC)/colamp-SND2-DAP-Seq(GSE60143)/Homer	CTTVWNNNWBAAGNW	0.01	-4.975	0.0163	719	0.0462	1364.6	0.0422
Pho4(bHLH)/Yeast-Pho4-ChIP-Seq(GSE29506)/Homer	AAGCACGTGBGD	0.01	-4.973	0.0163	422	0.0271	777.5	0.024
Max(bHLH)/K562-Max-ChIP-Seq(GSE31477)/Homer	RCCACGTGGYYN	0.01	-4.928	0.0169	1289	0.0829	2508.9	0.0776
GT1(Trihelix)/col-GT1-DAP-Seq(GSE60143)/Homer	TTAACCATGGTTAAD	0.01	-4.907	0.0173	15	0.001	15.8	0.0005
AGL16(MADS)/col-AGL16-DAP-Seq(GSE60143)/Homer	TWCCHWATWDGGAAA	0.01	-4.867	0.0179	89	0.0057	141.5	0.0044
GBF5(bZIP)/colamp-GBF5-DAP-Seq(GSE60143)/Homer	WKNWSACGTGGCAWN	0.01	-4.855	0.0181	469	0.0301	871.8	0.0269
ANAC075(NAC)/col-ANAC075-DAP-Seq(GSE60143)/Homer	CTTSWWNWWSAAGYT	0.01	-4.833	0.0185	449	0.0289	832.1	0.0257
AT2G31460(REMB3)/col-AT2G31460-DAP-Seq(GSE60143)/Homer	WNWARWDGAAATGAT	0.01	-4.82	0.0187	401	0.0258	738.7	0.0228
Pit1+1bp(Homeobox)/GCrat-Pit1-ChIP-Seq(GSE58009)/Homer	ATGCATAATTCA	0.01	-4.815	0.0187	358	0.023	654.1	0.0202
AGL6(MADS)/col-AGL6-DAP-Seq(GSE60143)/Homer	TTWCCWWAWWDGGWA	0.01	-4.814	0.0187	136	0.0087	228.7	0.0071
Pho2(bHLH)/Yeast-Pho2-ChIP-Seq(GSE29506)/Homer	CCCACGTGCT	0.01	-4.807	0.0188	964	0.062	1857.2	0.0574
Phox2b(Homeobox)/CLBGA-PHOX2B-ChIP-Seq(GSE90683)/Homer	TTAATTNAATTA	0.01	-4.772	0.0194	192	0.0123	334.8	0.0104
STAT6(Stat)/CD4-Stat6-ChIP-Seq(GSE22104)/Homer	ABTTCYYRRGAA	0.01	-4.615	0.0226	685	0.044	1303.8	0.0403
ANAC070(NAC)/colamp-ANAC070-DAP-Seq(GSE60143)/Homer	CTTRHDNHNBAAGHW	0.1	-4.578	0.0234	1430	0.0919	2802.9	0.0866
PU.1-IRF(ETS:IRF)/Bcell-PU.1-ChIP-Seq(GSE21512)/Homer	MGGAAGTGAAAC	0.1	-4.565	0.0237	1863	0.1197	3681.5	0.1138
ABI5(bZIP)/col-ABI5-DAP-Seq(GSE60143)/Homer	GCCACGTG	0.1	-4.563	0.0237	683	0.0439	1300.8	0.0402
AtHB32(ZFHD)/col200-AtHB32-DAP-Seq(GSE60143)/Homer	CGAATTAT	0.1	-4.54	0.0242	1342	0.0863	2625.4	0.0812
VND1(NAC)/col-VND1-DAP-Seq(GSE60143)/Homer	CTTRWDNHWYAAGYW	0.1	-4.504	0.025	991	0.0637	1918.4	0.0593
DPL-1(E2F)/cElegans-Adult-ChIP-Seq(modEncode)/Homer	TAGCGCGC	0.1	-4.5	0.025	1833	0.1178	3622.7	0.112
ANAC058(NAC)/col-ANAC058-DAP-Seq(GSE60143)/Homer	TWCTTGTDNNACAAG	0.1	-4.451	0.0262	717	0.0461	1370.2	0.0424
BPC1(BBRBPC)/colamp-BPC1-DAP-Seq(GSE60143)/Homer	GARGAGAGAGAA	0.1	-4.437	0.0265	936	0.0602	1809.5	0.0559
Hoxa10(Homeobox)/ChickenMSG-Hoxa10.Flag-ChIP-Seq(GSE86088)/Homer	GGYAATGAAA	0.1	-4.349	0.0289	744	0.0478	1426.8	0.0441
DUX(Homeobox)/C2C12-Dux-ChIP-Seq(GSE87279)/Homer	BCWGATTCAATCAAN	0.1	-4.344	0.029	3	0.0002	1.9	0.0001
PIF7(bHLH)/col-PIF7-DAP-Seq(GSE60143)/Homer	CCACGTGGNH	0.1	-4.329	0.0294	373	0.024	690.2	0.0213
CAMTA5(CAMTA)/col-CAMTA5-DAP-Seq(GSE60143)/Homer	ACGCGTTTTANACRC	0.1	-4.283	0.0307	426	0.0274	795.3	0.0246
AT5G25475(ABI3VP1)/col-AT5G25475-DAP-Seq(GSE60143)/Homer	RNNRNCAAGCADNDB	0.1	-4.251	0.0316	2053	0.132	4078	0.1261
Tcf21(bHLH)/ArterySmoothMuscle-Tcf21-ChIP-Seq(GSE61369)/Homer	NAACAGCTGG	0.1	-4.211	0.0328	1492	0.0959	2938.6	0.0908
bZIP48(bZIP)/colamp-bZIP48-DAP-Seq(GSE60143)/Homer	DDWWKVTSACGTGGC	0.1	-4.179	0.0338	503	0.0323	949.9	0.0294
MYB41(MYB)/col-MYB41-DAP-Seq(GSE60143)/Homer	BYTYACCTAA	0.1	-4.13	0.0354	493	0.0317	930.5	0.0288
Tbx20(T-box)/Heart-Tbx20-ChIP-Seq(GSE29636)/Homer	GGTGYTGACAGS	0.1	-4.095	0.0366	355	0.0228	658.9	0.0204
LBD18(LOBAS2)/colamp-LBD18-DAP-Seq(GSE60143)/Homer	CKGAWWTTCHGS	0.1	-4.076	0.0372	3493	0.2245	7034.3	0.2175
DEL1(E2FDP)/colamp-DEL1-DAP-Seq(GSE60143)/Homer	TTCCCGCCAA	0.1	-4.066	0.0375	9	0.0006	8.7	0.0003
ISRE(IRF)/ThioMac-LPS-Expression(GSE23622)/Homer	AGTTTCASTTTC	0.1	-4.065	0.0375	83	0.0053	135.5	0.0042
Six1(Homeobox)/Myoblast-Six1-ChIP-Chip(GSE20150)/Homer	GKVTCADRTTWC	0.1	-4.003	0.0398	336	0.0216	622.4	0.0192
LBD2(LOBAS2)/colamp-LBD2-DAP-Seq(GSE60143)/Homer	TCCGAWTTTTTCGGN	0.1	-3.913	0.0434	378	0.0243	706	0.0218
Dlx3(Homeobox)/Kerainocytes-Dlx3-ChIP-Seq(GSE89884)/Homer	NDGTAATTAC	0.1	-3.881	0.0448	760	0.0488	1468.1	0.0454
ANAC096(NAC)/colamp-ANAC096-DAP-Seq(GSE60143)/Homer	TACTTGWNNNWCAAG	0.1	-3.808	0.048	800	0.0514	1550	0.0479
NAC2(NAC)/colamp-NAC2-DAP-Seq(GSE60143)/Homer	TDCTTGNNNNNCAAG	0.1	-3.767	0.0499	879	0.0565	1710.2	0.0529
Dorsal(RHD)/Embryo-dl-ChIP-Seq(GSE65441)/Homer	GGGAAAAMCCCG	0.1	-3.687	0.054	246	0.0158	450.9	0.0139
AREB3(bZIP)/col-AREB3-DAP-Seq(GSE60143)/Homer	NKGMCACGTGDCMNN	0.1	-3.685	0.054	479	0.0308	910.8	0.0282
PCF/Arabidopsis-Promoters/Homer	NNWWWTGGGCYTDDN	0.1	-3.669	0.0547	274	0.0176	505.9	0.0156
ZBTB18(Zf)/HEK293-ZBTB18.GFP-ChIP-Seq(GSE58341)/Homer	AACATCTGGA	0.1	-3.646	0.0559	730	0.0469	1413.6	0.0437
At1g19000(MYBrelated)/colamp-At1g19000-DAP-Seq(GSE60143)/Homer	WWTGGATAADDT	0.1	-3.613	0.0576	892	0.0573	1740.3	0.0538
AT3G10580(MYBrelated)/colamp-AT3G10580-DAP-Seq(GSE60143)/Homer	TACCTAACWNHW	0.1	-3.612	0.0576	540	0.0347	1033.9	0.032
Unknown3/Drosophila-Promoters/Homer	ACVAKCTGGCAGCGC	0.1	-3.602	0.058	150	0.0096	265.6	0.0082
MYB56(MYB)/colamp-MYB56-DAP-Seq(GSE60143)/Homer	HTAACGRMHY	0.1	-3.588	0.0587	1093	0.0703	2147.2	0.0664
Sox10(HMG)/SciaticNerve-Sox3-ChIP-Seq(GSE35132)/Homer	CCWTTGTYYB	0.1	-3.577	0.0592	2422	0.1557	4857.2	0.1502
Sox4(HMG)/proB-Sox4-ChIP-Seq(GSE50066)/Homer	YCTTTGTTCC	0.1	-3.46	0.0664	1213	0.078	2394.9	0.074
Tcfcp2l1(CP2)/mES-Tcfcp2l1-ChIP-Seq(GSE11431)/Homer	NRAACCRGTTYRAACCRGYT	0.1	-3.459	0.0664	245	0.0157	451.6	0.014
MYB88(MYB)/col-MYB88-DAP-Seq(GSE60143)/Homer	HNACGCTCCT	0.1	-3.409	0.0696	3455	0.2221	6986.9	0.216
AZF1(C2H2)/colamp-AZF1-DAP-Seq(GSE60143)/Homer	DKSWCACT	0.1	-3.4	0.07	8718	0.5604	17889.1	0.553
At5g22890(C2H2)/col-At5g22890-DAP-Seq(GSE60143)/Homer	NSAGGTKWTATCTGD	0.1	-3.399	0.07	39	0.0025	59.9	0.0019
CRX(Homeobox)/Retina-Crx-ChIP-Seq(GSE20012)/Homer	GCTAATCC	0.1	-3.386	0.0707	3367	0.2164	6806.7	0.2104
c-Myc(bHLH)/mES-cMyc-ChIP-Seq(GSE11431)/Homer	VVCCACGTGG	0.1	-3.357	0.0727	955	0.0614	1874.7	0.058
ATHB40(HB)/col-ATHB40-DAP-Seq(GSE60143)/Homer	HCAATWATTG	0.1	-3.348	0.0731	901	0.0579	1765.1	0.0546
SRS7(SRS)/colamp-SRS7-DAP-Seq(GSE60143)/Homer	HATAGGTTTH	0.1	-3.33	0.0743	5050	0.3246	10281.4	0.3178
PRDM1(Zf)/Hela-PRDM1-ChIP-Seq(GSE31477)/Homer	ACTTTCACTTTC	0.1	-3.321	0.0748	760	0.0488	1481.2	0.0458
bZIP53(bZIP)/colamp-bZIP53-DAP-Seq(GSE60143)/Homer	NDNHSACGTGKMNNN	0.1	-3.259	0.0794	492	0.0316	944.6	0.0292
ANAC071(NAC)/col-ANAC071-DAP-Seq(GSE60143)/Homer	DNCKTNDNNNHNAAG	0.1	-3.257	0.0794	1041	0.0669	2051.2	0.0634
BAM8(BES1)/col-BAM8-DAP-Seq(GSE60143)/Homer	NNWSACACGTGTSWN	0.1	-3.251	0.0798	308	0.0198	578.6	0.0179
ZFX(Zf)/mES-Zfx-ChIP-Seq(GSE11431)/Homer	AGGCCTRG	0.1	-3.244	0.0802	2016	0.1296	4039.6	0.1249
ZNF136(Zf)/HEK293-ZNF136.GFP-ChIP-Seq(GSE58341)/Homer	YTKGATAHAGTATTCTWGGTNGGCA	0.1	-3.228	0.0813	100	0.0064	173.7	0.0054
GRHL2(CP2)/HBE-GRHL2-ChIP-Seq(GSE46194)/Homer	AAACYKGTTWDACMRGTTTB	0.1	-3.161	0.0867	504	0.0324	970.7	0.03
TEAD(TEA)/Fibroblast-PU.1-ChIP-Seq(Unpublished)/Homer	YCWGGAATGY	0.1	-3.106	0.0915	836	0.0537	1640.9	0.0507
NFY(CCAAT)/Promoter/Homer	RGCCAATSRG	0.1	-3.082	0.0935	1358	0.0873	2701.7	0.0835
LMI1(HB)/colamp-LMI1-DAP-Seq(GSE60143)/Homer	AATTATTG	0.1	-3.081	0.0935	760	0.0488	1487.4	0.046
Tbox:Smad(T-box,MAD)/ESCd5-Smad2_3-ChIP-Seq(GSE29422)/Homer	AGGTGHCAGACA	0.1	-3.03	0.0981	283	0.0182	532.3	0.0165
BZR1(BZR)/col-BZR1-DAP-Seq(GSE60143)/Homer	NNCRCACGTGCG	0.1	-3.016	0.0992	218	0.014	404.4	0.0125
MYB3R1(MYB)/col-MYB3R1-DAP-Seq(GSE60143)/Homer	WWDTDACCGTTR	0.1	-2.929	0.108	324	0.0208	616	0.019
MNT(bHLH)/HepG2-MNT-ChIP-Seq(Encode)/Homer	DGCACACGTG	0.1	-2.912	0.1097	1903	0.1223	3821.2	0.1181
bZIP28(bZIP)/col-bZIP28-DAP-Seq(GSE60143)/Homer	TGCCACGTSABH	0.1	-2.854	0.1159	423	0.0272	814.1	0.0252
Prop1(Homeobox)/GHFT1-PROP1.biotin-ChIP-Seq(GSE77302)/Homer	NTAATBNAATTA	0.1	-2.829	0.1187	637	0.0409	1245.5	0.0385
Initiator/Drosophila-Promoters/Homer	NTCAGTYG	0.1	-2.814	0.1202	3470	0.223	7047.7	0.2179
WUS1(Homeobox)/colamp-WUS1-DAP-Seq(GSE60143)/Homer	CAWTCATTCA	0.1	-2.763	0.1262	541	0.0348	1053.3	0.0326
PR(NR)/T47D-PR-ChIP-Seq(GSE31130)/Homer	VAGRACAKNCTGTBC	0.1	-2.762	0.1262	3617	0.2325	7353.1	0.2273
ZNF7(Zf)/HepG2-ZNF7.Flag-ChIP-Seq(Encode)/Homer	CTGCCWVCTTTTRTA	0.1	-2.753	0.1269	771	0.0496	1518.7	0.0469
AT5G22990(C2H2)/col-AT5G22990-DAP-Seq(GSE60143)/Homer	WCGAHDTCGWHN	0.1	-2.727	0.1301	122	0.0078	220.7	0.0068
NeuroG2(bHLH)/Fibroblast-NeuroG2-ChIP-Seq(GSE75910)/Homer	ACCATCTGTT	0.1	-2.727	0.1301	2311	0.1485	4666.2	0.1442
ATHB53(HB)/col-ATHB53-DAP-Seq(GSE60143)/Homer	CAATAATT	0.1	-2.718	0.1307	538	0.0346	1048.7	0.0324
MYB62(MYB)/colamp-MYB62-DAP-Seq(GSE60143)/Homer	NTACCTAACT	0.1	-2.713	0.131	1856	0.1193	3733.6	0.1154
IRF1(IRF)/PBMC-IRF1-ChIP-Seq(GSE43036)/Homer	GAAAGTGAAAGT	0.1	-2.672	0.1363	179	0.0115	332.5	0.0103
E2F3(E2F)/MEF-E2F3-ChIP-Seq(GSE71376)/Homer	BTKGGCGGGAAA	0.1	-2.657	0.1381	1135	0.073	2261.7	0.0699
AT4G00250(GeBP)/col-AT4G00250-DAP-Seq(GSE60143)/Homer	WDTGGATAAKRT	0.1	-2.656	0.1381	620	0.0399	1215.1	0.0376
dof42(C2C2dof)/col-dof42-DAP-Seq(GSE60143)/Homer	AAAAAGGC	0.1	-2.623	0.1423	816	0.0524	1613.9	0.0499
OCT:OCT(POU,Homeobox,IR1)/NPC-Brn2-ChIP-Seq(GSE35496)/Homer	ATGAATWATTCATGA	0.1	-2.623	0.1423	13	0.0008	17.5	0.0005
At1g76110(ARID)/colamp-At1g76110-DAP-Seq(GSE60143)/Homer	ATTTAATG	0.1	-2.588	0.1468	672	0.0432	1322.7	0.0409
NeuroD1(bHLH)/Islet-NeuroD1-ChIP-Seq(GSE30298)/Homer	GCCATCTGTT	0.1	-2.578	0.1479	1167	0.075	2329.1	0.072
Pax7(Paired,Homeobox),longest/Myoblast-Pax7-ChIP-Seq(GSE25064)/Homer	NTAATTDGCYAATTANNWWD	0.1	-2.552	0.1515	30	0.0019	47.8	0.0015
Phox2a(Homeobox)/Neuron-Phox2a-ChIP-Seq(GSE31456)/Homer	YTAATYNRATTA	0.1	-2.549	0.1517	383	0.0246	740.7	0.0229
TEAD3(TEA)/HepG2-TEAD3-ChIP-Seq(Encode)/Homer	TRCATTCCAG	0.1	-2.491	0.1604	1500	0.0964	3013.6	0.0932
SVP(MADS)/col-SVP-DAP-Seq(GSE60143)/Homer	ANTTWCCHAATTTGG	0.1	-2.468	0.1639	582	0.0374	1143.9	0.0354
AT2G28810(C2C2dof)/colamp-AT2G28810-DAP-Seq(GSE60143)/Homer	VAAAAAGTWA	0.1	-2.464	0.1642	3350	0.2153	6819.7	0.2108
AGL13(MADS)/col-AGL13-DAP-Seq(GSE60143)/Homer	TWCCAWWTWTGGWAA	0.1	-2.459	0.1647	39	0.0025	64.2	0.002
GATA6(C2C2gata)/col200-GATA6-DAP-Seq(GSE60143)/Homer	TAGATCTARAHH	0.1	-2.457	0.1647	145	0.0093	268.1	0.0083
DEL2(E2FDP)/col-DEL2-DAP-Seq(GSE60143)/Homer	WTTTCSCGCC	0.1	-2.384	0.1767	532	0.0342	1044.1	0.0323
bZIP68(bZIP)/col-bZIP68-DAP-Seq(GSE60143)/Homer	WGCCACGTGK	0.1	-2.377	0.1776	524	0.0337	1028.8	0.0318
ZNF652/HepG2-ZNF652.Flag-ChIP-Seq(Encode)/Homer	TTAACCCTTTVNKKN	0.1	-2.328	0.1861	308	0.0198	594.4	0.0184
AGL25(MADS)/colamp-AGL25-DAP-Seq(GSE60143)/Homer	TTTCCATWTWTGGAA	0.1	-2.318	0.1877	55	0.0035	95.4	0.003
Sox17(HMG)/Endoderm-Sox17-ChIP-Seq(GSE61475)/Homer	CCATTGTTYB	1	-2.268	0.1969	947	0.0609	1891.9	0.0585
E2F6(E2F)/Hela-E2F6-ChIP-Seq(GSE31477)/Homer	GGCGGGAARN	1	-2.258	0.1986	938	0.0603	1873.2	0.0579
MYB121(MYB)/col-MYB121-DAP-Seq(GSE60143)/Homer	YNTACCTAACWW	1	-2.212	0.2074	426	0.0274	834.2	0.0258
Pitx1(Homeobox)/Chicken-Pitx1-ChIP-Seq(GSE38910)/Homer	TAATCCCN	1	-2.203	0.2089	6096	0.3918	12519.7	0.387
At1g13300(G2like)/col-At1g13300-DAP-Seq(GSE60143)/Homer	GAATCTWAGATTCYN	1	-2.168	0.2159	11	0.0007	15.3	0.0005
MYB27(MYB)/colamp-MYB27-DAP-Seq(GSE60143)/Homer	TACCTAACWT	1	-2.164	0.2164	207	0.0133	395.2	0.0122
GATA19(C2C2gata)/colamp-GATA19-DAP-Seq(GSE60143)/Homer	ATCSGATCVG	1	-2.164	0.2164	87	0.0056	158.2	0.0049
EFL-1(E2F)/cElegans-L1-EFL1-ChIP-Seq(modEncode)/Homer	TGCAARYGCGCTCYA	1	-2.164	0.2164	38	0.0024	64.6	0.002
Myf5(bHLH)/GM-Myf5-ChIP-Seq(GSE24852)/Homer	BAACAGCTGT	1	-2.145	0.2194	1097	0.0705	2203	0.0681
DUX4(Homeobox)/Myoblasts-DUX4.V5-ChIP-Seq(GSE75791)/Homer	NWTAAYCYAATCAWN	1	-2.14	0.22	60	0.0039	106.9	0.0033
GAGA-repeat/Arabidopsis-Promoters/Homer	CTCTCTCTCY	1	-2.106	0.2272	1999	0.1285	4055.6	0.1254
Smad3(MAD)/NPC-Smad3-ChIP-Seq(GSE36673)/Homer	TWGTCTGV	1	-2.08	0.2326	4748	0.3052	9734.9	0.3009
Atoh1(bHLH)/Cerebellum-Atoh1-ChIP-Seq(GSE22111)/Homer	VNRVCAGCTGGY	1	-2.058	0.2374	1617	0.1039	3272.7	0.1012
NST1(NAC)/colamp-NST1-DAP-Seq(GSE60143)/Homer	WRCTTRWWNWWYAAG	1	-2.048	0.2394	1037	0.0667	2083.9	0.0644
RBPJ:Ebox(?,bHLH)/Panc1-Rbpj1-ChIP-Seq(GSE47459)/Homer	GGGRAARRGRMCAGMTG	1	-2.042	0.2402	420	0.027	826.3	0.0255
IRF3(IRF)/BMDM-Irf3-ChIP-Seq(GSE67343)/Homer	AGTTTCAKTTTC	1	-2.041	0.2402	419	0.0269	824.4	0.0255
SND3(NAC)/col-SND3-DAP-Seq(GSE60143)/Homer	CTTNHNNNDNAAGNH	1	-2.023	0.2441	859	0.0552	1721	0.0532
ABF2(bZIP)/col-ABF2-DAP-Seq(GSE60143)/Homer	KGMCACGTGDCMHHH	1	-2.01	0.2466	338	0.0217	661.2	0.0204
IRF2(IRF)/Erythroblas-IRF2-ChIP-Seq(GSE36985)/Homer	GAAASYGAAASY	1	-2.006	0.2472	152	0.0098	288.5	0.0089
SPL15(SBP)/colamp-SPL15-DAP-Seq(GSE60143)/Homer	WDWMMGTACADW	1	-1.982	0.2528	1990	0.1279	4043.8	0.125
bHLH122(bHLH)/col100-bHLH122-DAP-Seq(GSE60143)/Homer	NDDCAASTTGHHNWW	1	-1.941	0.2629	1194	0.0767	2410	0.0745
NFAT:AP1(RHD,bZIP)/Jurkat-NFATC1-ChIP-Seq(Jolma_et_al.)/Homer	SARTGGAAAAWRTGAGTCAB	1	-1.932	0.2649	173	0.0111	331.7	0.0103
bZIP44(bZIP)/colamp-bZIP44-DAP-Seq(GSE60143)/Homer	NDTGCCACGTCAGCH	1	-1.887	0.2763	28	0.0018	47.1	0.0015
GATA3(Zf),DR4/iTreg-Gata3-ChIP-Seq(GSE20898)/Homer	AGATGKDGAGATAAG	1	-1.885	0.2766	89	0.0057	165.7	0.0051
PBX1(Homeobox)/MCF7-PBX1-ChIP-Seq(GSE28007)/Homer	GSCTGTCACTCA	1	-1.883	0.2766	138	0.0089	262.5	0.0081
SPL1(SBP)/colamp-SPL1-DAP-Seq(GSE60143)/Homer	HYGTACDTWH	1	-1.875	0.2783	2479	0.1593	5057.5	0.1563
AT1G76880(Trihelix)/col-AT1G76880-DAP-Seq(GSE60143)/Homer	ACGGTAAAAW	1	-1.872	0.2786	407	0.0262	804.3	0.0249
Unknown3/Arabidopsis-Promoters/Homer	AYTAAACCGG	1	-1.834	0.2888	226	0.0145	439.8	0.0136
GATA12(C2C2gata)/col-GATA12-DAP-Seq(GSE60143)/Homer	YAGATCTRAW	1	-1.829	0.2897	723	0.0465	1449.4	0.0448
CRC(C2C2YABBY)/col-CRC-DAP-Seq(GSE60143)/Homer	TWATSATA	1	-1.815	0.2932	1369	0.088	2774.9	0.0858
SOC1(MADS)/Seedling-SOC1-ChIP-Seq(GSE45846)/Homer	TWCCAWWTWTGG	1	-1.809	0.2946	385	0.0247	761.1	0.0235
Ap4(bHLH)/AML-Tfap4-ChIP-Seq(GSE45738)/Homer	NAHCAGCTGD	1	-1.796	0.2977	1887	0.1213	3841.8	0.1188
SeqBias: C/A-bias	MMMMMMMMMM	1	-1.792	0.2984	15549	0.9994	32321.7	0.9992
GATA(Zf),IR4/iTreg-Gata3-ChIP-Seq(GSE20898)/Homer	NAGATWNBNATCTNN	1	-1.79	0.2984	94	0.006	176.2	0.0054
bHLH130(bHLH)/col-bHLH130-DAP-Seq(GSE60143)/Homer	GCAACTTG	1	-1.789	0.2984	988	0.0635	1993.6	0.0616
DEAR5(AP2EREBP)/col-DEAR5-DAP-Seq(GSE60143)/Homer	NDWTGTCGGTGRWDN	1	-1.752	0.3088	165	0.0106	318.9	0.0099
At1g74840(MYBrelated)/col100-At1g74840-DAP-Seq(GSE60143)/Homer	YHTTATCCAWWT	1	-1.728	0.3159	774	0.0497	1557.1	0.0481
PLT1(AP2EREBP)/colamp-PLT1-DAP-Seq(GSE60143)/Homer	GCACGAWTYCCGAGG	1	-1.7	0.3241	104	0.0067	197.3	0.0061
Six2(Homeobox)/NephronProgenitor-Six2-ChIP-Seq(GSE39837)/Homer	GWAAYHTGAKMC	1	-1.686	0.328	1311	0.0843	2661.9	0.0823
LBD19(LOBAS2)/colamp-LBD19-DAP-Seq(GSE60143)/Homer	CCKGAAWTTCMGGAW	1	-1.66	0.3361	2516	0.1617	5147.6	0.1591
WIP5(C2H2)/colamp-WIP5-DAP-Seq(GSE60143)/Homer	TDTTCTCMAGGT	1	-1.639	0.3428	1692	0.1088	3448.3	0.1066
bZIP16(bZIP)/colamp-bZIP16-DAP-Seq(GSE60143)/Homer	TGCCACGTGD	1	-1.627	0.3463	416	0.0267	829.4	0.0256
AT1G69570(C2C2dof)/col-AT1G69570-DAP-Seq(GSE60143)/Homer	WAAAAGTGHH	1	-1.588	0.3594	1726	0.1109	3521.7	0.1089
TOD6?/SacCer-Promoters/Homer	GCGATGAGMT	1	-1.582	0.3608	219	0.0141	430.7	0.0133
EKLF(Zf)/Erythrocyte-Klf1-ChIP-Seq(GSE20478)/Homer	NWGGGTGTGGCY	1	-1.563	0.3673	339	0.0218	674.1	0.0208
VRN1(ABI3VP1)/col-VRN1-DAP-Seq(GSE60143)/Homer	TTTTTTTTTT	1	-1.537	0.376	518	0.0333	1040.3	0.0322
HOXA9(Homeobox)/HSC-Hoxa9-ChIP-Seq(GSE33509)/Homer	GGCCATAAATCA	1	-1.532	0.3775	780	0.0501	1577.9	0.0488
BORIS(Zf)/K562-CTCFL-ChIP-Seq(GSE32465)/Homer	CNNBRGCGCCCCCTGSTGGC	1	-1.474	0.399	403	0.0259	807.4	0.025
PAX3:FKHR-fusion(Paired,Homeobox)/Rh4-PAX3:FKHR-ChIP-Seq(GSE19063)/Homer	ACCRTGACTAATTNN	1	-1.452	0.4072	256	0.0165	508.7	0.0157
E2F1(E2F)/Hela-E2F1-ChIP-Seq(GSE22478)/Homer	CWGGCGGGAA	1	-1.447	0.4084	430	0.0276	863.1	0.0267
Tbr1(T-box)/Cortex-Tbr1-ChIP-Seq(GSE71384)/Homer	AAGGTGTKAA	1	-1.425	0.4168	1868	0.1201	3824.3	0.1182
Hoxc9(Homeobox)/Ainv15-Hoxc9-ChIP-Seq(GSE21812)/Homer	GGCCATAAATCA	1	-1.424	0.4168	561	0.0361	1132.5	0.035
Brn2(POU,Homeobox)/NPC-Brn2-ChIP-Seq(GSE35496)/Homer	ATGAATATTC	1	-1.421	0.417	76	0.0049	145.7	0.0045
Sox15(HMG)/CPA-Sox15-ChIP-Seq(GSE62909)/Homer	RAACAATGGN	1	-1.416	0.4185	1438	0.0924	2937.2	0.0908
AT2G33550(Trihelix)/colamp-AT2G33550-DAP-Seq(GSE60143)/Homer	TTTAAGGGCAYTTTT	1	-1.39	0.4286	2734	0.1757	5617.8	0.1737
p53(p53)/Saos-p53-ChIP-Seq(GSE15780)/Homer	RRCATGYCYRGRCATGYYYN	1	-1.387	0.4287	130	0.0084	254.2	0.0079
p53(p53)/Saos-p53-ChIP-Seq/Homer	RRCATGYCYRGRCATGYYYN	1	-1.387	0.4287	130	0.0084	254.2	0.0079
Knotted(Homeobox)/Corn-KN1-ChIP-Seq(GSE39161)/Homer	GAYGNGACRGGN	1	-1.343	0.4471	2085	0.134	4278.5	0.1323
JGL(C2H2)/col-JGL-DAP-Seq(GSE60143)/Homer	ACYTTCAGTT	1	-1.337	0.4488	2401	0.1543	4932.9	0.1525
Tbx5(T-box)/HL1-Tbx5.biotin-ChIP-Seq(GSE21529)/Homer	AGGTGTCA	1	-1.327	0.4526	5091	0.3272	10508.9	0.3249
Pax7(Paired,Homeobox),long/Myoblast-Pax7-ChIP-Seq(GSE25064)/Homer	TAATCHGATTAC	1	-1.326	0.4526	27	0.0017	49.6	0.0015
ANAC042(NAC)/col-ANAC042-DAP-Seq(GSE60143)/Homer	CGTNDHNDHNACGKY	1	-1.305	0.4612	1066	0.0685	2176.8	0.0673
GATA3(Zf),DR8/iTreg-Gata3-ChIP-Seq(GSE20898)/Homer	AGATSTNDNNDSAGATAASN	1	-1.292	0.4663	95	0.0061	185.4	0.0057
p73(p53)/Trachea-p73-ChIP-Seq(PRJNA310161)/Homer	NRRRCAWGTCCDGRCATGYY	1	-1.269	0.4763	56	0.0036	107.1	0.0033
AT5G63260(C3H)/col-AT5G63260-DAP-Seq(GSE60143)/Homer	RAAAAAGTRA	1	-1.23	0.4943	3374	0.2169	6956.8	0.2151
EBNA1(EBV-virus)/Raji-EBNA1-ChIP-Seq(GSE30709)/Homer	GGYAGCAYDTGCTDCCCNNN	1	-1.227	0.4953	22	0.0014	40.9	0.0013
Rfx2(HTH)/LoVo-RFX2-ChIP-Seq(GSE49402)/Homer	GTTGCCATGGCAACM	1	-1.197	0.5094	143	0.0092	284.8	0.0088
MYB3R4(MYB)/col-MYB3R4-DAP-Seq(GSE60143)/Homer	AWWTAACCGTTR	1	-1.151	0.5323	169	0.0109	338.3	0.0105
Rfx1(HTH)/NPC-H3K4me1-ChIP-Seq(GSE16256)/Homer	KGTTGCCATGGCAA	1	-1.103	0.5577	287	0.0184	581	0.018
BBX31(Orphan)/col-BBX31-DAP-Seq(GSE60143)/Homer	NAAAAAGTDA	1	-1.088	0.5651	2221	0.1428	4579.6	0.1416
GBF6(bZIP)/colamp-GBF6-DAP-Seq(GSE60143)/Homer	WWTGMCACGTCABCW	1	-1.074	0.5717	325	0.0209	660.1	0.0204
EBF1(EBF)/Near-E2A-ChIP-Seq(GSE21512)/Homer	GTCCCCWGGGGA	1	-1.041	0.59	1454	0.0935	2994.2	0.0926
Bcl6(Zf)/Liver-Bcl6-ChIP-Seq(GSE31578)/Homer	NNNCTTTCCAGGAAA	1	-1.037	0.5912	1969	0.1266	4061	0.1255
Isl1(Homeobox)/Neuron-Isl1-ChIP-Seq(GSE31456)/Homer	CTAATKGV	1	-1.026	0.5972	2531	0.1627	5227.5	0.1616
RVE1(MYBrelated)/col-RVE1-DAP-Seq(GSE60143)/Homer	AAATATCT	1	-1.018	0.6005	567	0.0364	1161.6	0.0359
OBP4(C2C2dof)/col-OBP4-DAP-Seq(GSE60143)/Homer	WTTHACTTTTTB	1	-0.9459	0.6445	1905	0.1224	3936.2	0.1217
RFX(HTH)/K562-RFX3-ChIP-Seq(SRA012198)/Homer	CGGTTGCCATGGCAAC	1	-0.9421	0.6459	129	0.0083	261.9	0.0081
ZNF669(Zf)/HEK293-ZNF669.GFP-ChIP-Seq(GSE58341)/Homer	GARTGGTCATCGCCC	1	-0.92	0.6593	101	0.0065	204.7	0.0063
PABPC1(?)/MEL-PABC1-CLIP-Seq(GSE69755)/Homer	HAATAAAGNN	1	-0.9185	0.6593	2595	0.1668	5370.7	0.166
p53(p53)/mES-cMyc-ChIP-Seq(GSE11431)/Homer	ACATGCCCGGGCAT	1	-0.8834	0.6815	23	0.0015	45.8	0.0014
RAP211(AP2EREBP)/colamp-RAP211-DAP-Seq(GSE60143)/Homer	RGCCGGCYWW	1	-0.8656	0.6926	3595	0.2311	7452.9	0.2304
MyoG(bHLH)/C2C12-MyoG-ChIP-Seq(GSE36024)/Homer	AACAGCTG	1	-0.8639	0.6926	1662	0.1068	3439.1	0.1063
EBF(EBF)/proBcell-EBF-ChIP-Seq(GSE21978)/Homer	DGTCCCYRGGGA	1	-0.8563	0.6967	251	0.0161	515	0.0159
DMRT6(DM)/Testis-DMRT6-ChIP-Seq(GSE60440)/Homer	YDGHTACAWTGTADC	1	-0.8464	0.7025	231	0.0148	474.8	0.0147
YY1(Zf)/Promoter/Homer	CAAGATGGCGGC	1	-0.8177	0.7217	143	0.0092	293.6	0.0091
DMRT1(DM)/Testis-DMRT1-ChIP-Seq(GSE64892)/Homer	TWGHWACAWTGTWDC	1	-0.8169	0.7217	288	0.0185	593.5	0.0183
HDG7(HB)/col-HDG7-DAP-Seq(GSE60143)/Homer	WGCATTTAATGC	1	-0.7976	0.7339	164	0.0105	337.1	0.0104
GT3a(Trihelix)/col-GT3a-DAP-Seq(GSE60143)/Homer	WNACACGTGTYWWAW	1	-0.7949	0.7347	262	0.0168	540.9	0.0167
At4g38000(C2C2dof)/col-At4g38000-DAP-Seq(GSE60143)/Homer	WWWTWACTTTTT	1	-0.7412	0.7739	1519	0.0976	3153.4	0.0975
Tcf12(bHLH)/GM12878-Tcf12-ChIP-Seq(GSE32465)/Homer	VCAGCTGYTG	1	-0.7402	0.7739	1505	0.0967	3124.3	0.0966
AT3G10030(Trihelix)/colamp-AT3G10030-DAP-Seq(GSE60143)/Homer	GCCGTTAA	1	-0.7356	0.7757	740	0.0476	1535.4	0.0475
AT5G60130(ABI3VP1)/col-AT5G60130-DAP-Seq(GSE60143)/Homer	WTTYTAAGVAAA	1	-0.7349	0.7757	2407	0.1547	4999.6	0.1546
HSF6(HSF)/col-HSF6-DAP-Seq(GSE60143)/Homer	TTYTAGAAGCTTCTA	1	-0.7242	0.7819	239	0.0154	495.3	0.0153
Sox9(HMG)/Limb-SOX9-ChIP-Seq(GSE73225)/Homer	AGGVNCCTTTGT	1	-0.724	0.7819	1179	0.0758	2448.8	0.0757
ZSCAN22(Zf)/HEK293-ZSCAN22.GFP-ChIP-Seq(GSE58341)/Homer	SMCAGTCWGAKGGAGGAGGC	1	-0.7233	0.7819	94	0.006	194.8	0.006
ZNF519(Zf)/HEK293-ZNF519.GFP-ChIP-Seq(GSE58341)/Homer	GAGSCCGAGC	1	-0.7115	0.788	374	0.024	776.2	0.024
ZNF16(Zf)/HEK293-ZNF16.GFP-ChIP-Seq(GSE58341)/Homer	MACCTTCYATGGCTCCCTAKTGCCY	1	-0.6963	0.7975	9	0.0006	18.5	0.0006
Unknown2/Arabidopsis-Promoters/Homer	AAACGACGTCGTTTT	1	-0.6963	0.7975	9	0.0006	18.8	0.0006
ZNF675(Zf)/HEK293-ZNF675.GFP-ChIP-Seq(GSE58341)/Homer	ARGAGGMCAAAATGW	1	-0.6888	0.8022	146	0.0094	303.8	0.0094
Unknown-ESC-element(?)/mES-Nanog-ChIP-Seq(GSE11724)/Homer	CACAGCAGGGGG	1	-0.6866	0.8026	824	0.053	1714	0.053
SeqBias: GA-repeat	GAGAGAGAGA	1	-0.6845	0.803	9784	0.6289	20343.8	0.6289
NTM2(NAC)/col-NTM2-DAP-Seq(GSE60143)/Homer	CTTRTNNNAYAAGBH	1	-0.6747	0.8096	663	0.0426	1379.7	0.0427
bZIP42(bZIP)/colamp-bZIP42-DAP-Seq(GSE60143)/Homer	GCCACGTCAGCA	1	-0.6736	0.8096	7	0.0004	14.3	0.0004
AT5G66940(C2C2dof)/col-AT5G66940-DAP-Seq(GSE60143)/Homer	NNHACTTTWT	1	-0.6725	0.8096	2781	0.1788	5784.2	0.1788
CDF3(C2C2dof)/colamp-CDF3-DAP-Seq(GSE60143)/Homer	AAAAGTRM	1	-0.6635	0.8147	2478	0.1593	5155.9	0.1594
GATA1(C2C2gata)/colamp-GATA1-DAP-Seq(GSE60143)/Homer	DDWWYYAGATCTRRW	1	-0.6477	0.8264	420	0.027	875.5	0.0271
At1g64620(C2C2dof)/colamp-At1g64620-DAP-Seq(GSE60143)/Homer	CACTTTTT	1	-0.6464	0.8264	1990	0.1279	4142.1	0.128
PRDM14(Zf)/H1-PRDM14-ChIP-Seq(GSE22767)/Homer	RGGTCTCTAACY	1	-0.645	0.8264	406	0.0261	846.5	0.0262
Sox2(HMG)/mES-Sox2-ChIP-Seq(GSE11431)/Homer	BCCATTGTTC	1	-0.6405	0.8283	1188	0.0764	2474.3	0.0765
SGR5(C2H2)/colamp-SGR5-DAP-Seq(GSE60143)/Homer	TTTGTCTTTTTT	1	-0.6338	0.8325	861	0.0553	1794.9	0.0555
AT3G12130(C3H)/colamp-AT3G12130-DAP-Seq(GSE60143)/Homer	TMACTTTTTV	1	-0.6273	0.8367	3443	0.2213	7167.3	0.2216
At5g52660(MYBrelated)/colamp-At5g52660-DAP-Seq(GSE60143)/Homer	HAAAAATATCTW	1	-0.6115	0.8486	467	0.03	976	0.0302
MYB3R5(MYB)/col-MYB3R5-DAP-Seq(GSE60143)/Homer	THYAACGGTHAWAWT	1	-0.6069	0.8511	72	0.0046	151.9	0.0047
ETS:RUNX(ETS,Runt)/Jurkat-RUNX1-ChIP-Seq(GSE17954)/Homer	RCAGGATGTGGT	1	-0.5931	0.8616	133	0.0085	279.8	0.0087
Hoxa9(Homeobox)/ChickenMSG-Hoxa9.Flag-ChIP-Seq(GSE86088)/Homer	RGCAATNAAA	1	-0.5825	0.8694	3844	0.2471	8008.6	0.2476
GATA4(C2C2gata)/col-GATA4-DAP-Seq(GSE60143)/Homer	DDWTYAGATCTR	1	-0.5723	0.8769	896	0.0576	1873	0.0579
CES-1(Homeobox)/cElegans-L1-CES1-ChIP-Seq(modEncode)/Homer	AAATTSAATTTN	1	-0.5714	0.8769	554	0.0356	1159.2	0.0358
Barx1(Homeobox)/Stomach-Barx1.3xFlag-ChIP-Seq(GSE69483)/Homer	AAACMATTAN	1	-0.5625	0.8827	570	0.0366	1193.5	0.0369
MyoD(bHLH)/Myotube-MyoD-ChIP-Seq(GSE21614)/Homer	RRCAGCTGYTSY	1	-0.5614	0.8827	1229	0.079	2567.9	0.0794
CDM1(C3H)/colamp-CDM1-DAP-Seq(GSE60143)/Homer	CCGAWAWTWTCGGAN	1	-0.5547	0.8868	109	0.007	230.1	0.0071
Lhx1(Homeobox)/EmbryoCarcinoma-Lhx1-ChIP-Seq(GSE70957)/Homer	NNYTAATTAR	1	-0.5505	0.8891	1299	0.0835	2714.7	0.0839
IRF4(IRF)/GM12878-IRF4-ChIP-Seq(GSE32465)/Homer	ACTGAAACCA	1	-0.543	0.8944	554	0.0356	1161.4	0.0359
At4g01280(MYBrelated)/colamp-At4g01280-DAP-Seq(GSE60143)/Homer	AAATATCT	1	-0.532	0.9029	545	0.035	1143.3	0.0353
Sox3(HMG)/NPC-Sox3-ChIP-Seq(GSE33059)/Homer	CCWTTGTY	1	-0.5308	0.9029	2471	0.1588	5158.3	0.1595
HuR(?)/HEK293-HuR-CLIP-Seq(GSE87887)/Homer	BTTTGGTTTG	1	-0.5273	0.9043	5651	0.3632	11777.7	0.3641
DREB2(AP2EREBP)/col-DREB2-DAP-Seq(GSE60143)/Homer	TMACCGACATWA	1	-0.5268	0.9043	507	0.0326	1064.4	0.0329
IDD7(C2H2)/col-IDD7-DAP-Seq(GSE60143)/Homer	TTTGTCKTTTTN	1	-0.5236	0.9048	471	0.0303	989.5	0.0306
ZNF41(Zf)/HEK293-ZNF41.GFP-ChIP-Seq(GSE58341)/Homer	CCTCATGGTGYCYTWYTCCCTTGTG	1	-0.5152	0.911	26	0.0017	56.2	0.0017
Unknown1/Arabidopsis-Promoters/Homer	RGGGTAWWWTHGTAA	1	-0.5047	0.9192	75	0.0048	160.3	0.005
Pknox1(Homeobox)/ES-Prep1-ChIP-Seq(GSE63282)/Homer	SCTGTCAVTCAV	1	-0.5011	0.921	346	0.0222	729.5	0.0226
Ik-1	NHTTGGGAATRCC	1	-0.481	0.9383	15558	1	32348.7	1
ZKSCAN1(Zf)/HepG2-ZKSCAN1-ChIP-Seq(Encode)/Homer	GCACAYAGTAGGKCY	1	-0.4655	0.9515	34	0.0022	74.7	0.0023
Tbet(T-box)/CD8-Tbet-ChIP-Seq(GSE33802)/Homer	AGGTGTGAAM	1	-0.4618	0.9535	1448	0.0931	3035.9	0.0938
STZ(C2H2)/colamp-STZ-DAP-Seq(GSE60143)/Homer	HNBTCACT	1	-0.4611	0.9535	9265	0.5955	19305.2	0.5968
EBF2(EBF)/BrownAdipose-EBF2-ChIP-Seq(GSE97114)/Homer	NABTCCCWDGGGAVH	1	-0.4591	0.9535	1204	0.0774	2526.6	0.0781
GSC(Homeobox)/FrogEmbryos-GSC-ChIP-Seq(DRA000576)/Homer	RGGATTAR	1	-0.4527	0.9577	1665	0.107	3489.1	0.1079
NFAT(RHD)/Jurkat-NFATC1-ChIP-Seq(Jolma_et_al.)/Homer	ATTTTCCATT	1	-0.4347	0.9737	1071	0.0688	2251.2	0.0696
ZIM(C2C2gata)/col-ZIM-DAP-Seq(GSE60143)/Homer	ATCSRACGGTYRAGA	1	-0.4338	0.9737	7	0.0004	16.7	0.0005
MYB105(MYB)/colamp-MYB105-DAP-Seq(GSE60143)/Homer	RATWCCGTTA	1	-0.412	0.993	739	0.0475	1559.6	0.0482
ANAC011(NAC)/col-ANAC011-DAP-Seq(GSE60143)/Homer	TDCTTGYRNNDCAAG	1	-0.3935	1	413	0.0265	877.3	0.0271
Olig2(bHLH)/Neuron-Olig2-ChIP-Seq(GSE30882)/Homer	RCCATMTGTT	1	-0.375	1	2839	0.1825	5951.1	0.184
ZFP3(Zf)/HEK293-ZFP3.GFP-ChIP-Seq(GSE58341)/Homer	GGGTTTTGAAGGATGARTAGGAGTT	1	-0.3673	1	2	0.0001	5	0.0002
NFkB-p50,p52(RHD)/Monocyte-p50-ChIP-Chip(Schreiber_et_al.)/Homer	GGGGGAATCCCC	1	-0.3518	1	127	0.0082	276.1	0.0085
Twist(bHLH)/HMLE-TWIST1-ChIP-Seq(Chang_et_al)/Homer	VCAKCTGGNNNCCAGMTGBN	1	-0.3466	1	173	0.0111	374.1	0.0116
AT3G51470(DBP)/col-AT3G51470-DAP-Seq(GSE60143)/Homer	TTWHGGTGCACC	1	-0.3457	1	2553	0.1641	5360.2	0.1657
SPL13(SBP)/col-SPL13-DAP-Seq(GSE60143)/Homer	WAHTGTACGGAH	1	-0.3411	1	86	0.0055	189.9	0.0059
REM19(REM)/colamp-REM19-DAP-Seq(GSE60143)/Homer	AAAAAAAA	1	-0.3409	1	1126	0.0724	2378.8	0.0735
At2g45680(TCP)/colamp-At2g45680-DAP-Seq(GSE60143)/Homer	GTGGGNCCCACNDND	1	-0.3329	1	70	0.0045	155.8	0.0048
DREB19(AP2EREBP)/colamp-DREB19-DAP-Seq(GSE60143)/Homer	AATGTCGGTK	1	-0.3327	1	623	0.04	1324.1	0.0409
At5g66730(C2H2)/colamp-At5g66730-DAP-Seq(GSE60143)/Homer	TTTGTCKTTTTK	1	-0.3241	1	332	0.0213	713	0.022
SCRT1(Zf)/HEK293-SCRT1.eGFP-ChIP-Seq(Encode)/Homer	GCAACAGGTG	1	-0.3134	1	460	0.0296	983.8	0.0304
X-box(HTH)/NPC-H3K4me1-ChIP-Seq(GSE16256)/Homer	GGTTGCCATGGCAA	1	-0.3024	1	145	0.0093	317.7	0.0098
Hoxa13(Homeobox)/ChickenMSG-Hoxa13.Flag-ChIP-Seq(GSE86088)/Homer	CYHATAAAAN	1	-0.3016	1	3384	0.2175	7104.5	0.2196
AT3G52440(C2C2dof)/colamp-AT3G52440-DAP-Seq(GSE60143)/Homer	DTHACTTTTT	1	-0.3	1	3172	0.2039	6662.2	0.2059
dof24(C2C2dof)/col-dof24-DAP-Seq(GSE60143)/Homer	TWMCTTTTTG	1	-0.2927	1	2810	0.1806	5908.5	0.1826
CTCF-SatelliteElement(Zf?)/CD4+-CTCF-ChIP-Seq(Barski_et_al.)/Homer	TGCAGTTCCMVNWRTGGCCA	1	-0.283	1	22	0.0014	52.1	0.0016
dof43(C2C2dof)/colamp-dof43-DAP-Seq(GSE60143)/Homer	NAAAAAGTDA	1	-0.2743	1	2009	0.1291	4238.4	0.131
FOXA1:AR(Forkhead,NR)/LNCAP-AR-ChIP-Seq(GSE27824)/Homer	AGTAAACAAAAAAGAACAND	1	-0.2642	1	115	0.0074	255.6	0.0079
GEI-11(Myb?)/cElegans-L4-GEI11-ChIP-Seq(modEncode)/Homer	CCGACAYYTYACGGG	1	-0.2479	1	72	0.0046	163	0.005
MYB113(MYB)/col-MYB113-DAP-Seq(GSE60143)/Homer	HNDAWTCMGTTAYWN	1	-0.243	1	623	0.04	1335.1	0.0413
Rfx6(HTH)/Min6b1-Rfx6.HA-ChIP-Seq(GSE62844)/Homer	TGTTKCCTAGCAACM	1	-0.2351	1	1694	0.1089	3587.6	0.1109
REST-NRSF(Zf)/Jurkat-NRSF-ChIP-Seq/Homer	GGMGCTGTCCATGGTGCTGA	1	-0.2225	1	16	0.001	40.8	0.0013
EPR1(MYBrelated)/colamp-EPR1-DAP-Seq(GSE60143)/Homer	AAATATCT	1	-0.2216	1	342	0.022	743.5	0.023
LHY1(MYBrelated)/col-LHY1-DAP-Seq(GSE60143)/Homer	AAATATCT	1	-0.2216	1	342	0.022	743.5	0.023
SPL14(SBP)/col-SPL14-DAP-Seq(GSE60143)/Homer	NNWHTGTACGGAHNH	1	-0.2213	1	156	0.01	346.5	0.0107
CHR(?)/Hela-CellCycle-Expression/Homer	SRGTTTCAAA	1	-0.2155	1	740	0.0476	1586.5	0.049
SPL3(SBP)/colamp-SPL3-DAP-Seq(GSE60143)/Homer	WDTTGTACGGAH	1	-0.2141	1	43	0.0028	101.7	0.0031
HDG1(Homeobox)/col100-HDG1-DAP-Seq(GSE60143)/Homer	DDYAATTAATGH	1	-0.2132	1	576	0.037	1240.3	0.0383
AT1G49560(G2like)/colamp-AT1G49560-DAP-Seq(GSE60143)/Homer	GAWTCTNWDA	1	-0.2101	1	1716	0.1103	3639.2	0.1125
GATA11(C2C2gata)/col-GATA11-DAP-Seq(GSE60143)/Homer	DDHYYAGATCTR	1	-0.2056	1	498	0.032	1076.2	0.0333
Unknown4/Drosophila-Promoters/Homer	AAAAATACCRMA	1	-0.2046	1	104	0.0067	235.4	0.0073
Mouse_Recombination_Hotspot(Zf)/Testis-DMC1-ChIP-Seq(GSE24438)/Homer	ACTYKNATTCGTGNTACTTC	1	-0.2038	1	65	0.0042	150.6	0.0047
AT3G10113(MYBrelated)/col-AT3G10113-DAP-Seq(GSE60143)/Homer	WNAAATATCWWN	1	-0.2026	1	420	0.027	911	0.0282
IRF:BATF(IRF:bZIP)/pDC-Irf8-ChIP-Seq(GSE66899)/Homer	CTTTCANTATGACTV	1	-0.2022	1	121	0.0078	272.9	0.0084
SeqBias: CA-repeat	CACACACACA	1	-0.2015	1	9137	0.5873	19112.4	0.5908
NFkB-p65(RHD)/GM12787-p65-ChIP-Seq(GSE19485)/Homer	WGGGGATTTCCC	1	-0.201	1	586	0.0377	1263.9	0.0391
HSF7(HSF)/colamp-HSF7-DAP-Seq(GSE60143)/Homer	TTCTAGAAGCTTCTA	1	-0.1985	1	211	0.0136	466.8	0.0144
TCF4(bHLH)/SHSY5Y-TCF4-ChIP-Seq(GSE96915)/Homer	SMCATCTGKH	1	-0.1928	1	2198	0.1413	4654.3	0.1439
ARF16(ARF)/col-ARF16-DAP-Seq(GSE60143)/Homer	ATTTTACGAT	1	-0.1781	1	152	0.0098	341.4	0.0106
bZIP:IRF(bZIP,IRF)/Th17-BatF-ChIP-Seq(GSE39756)/Homer	NAGTTTCABTHTGACTNW	1	-0.1765	1	544	0.035	1178.9	0.0364
TCX2(CPP)/colamp-TCX2-DAP-Seq(GSE60143)/Homer	NNWWTTYRAAHN	1	-0.1715	1	1946	0.1251	4132.3	0.1277
AT3G58630(Trihelix)/col-AT3G58630-DAP-Seq(GSE60143)/Homer	TCTCCGGCGA	1	-0.1693	1	231	0.0148	512.5	0.0158
GATA14(C2C2gata)/col-GATA14-DAP-Seq(GSE60143)/Homer	AYCAGATCTG	1	-0.1664	1	828	0.0532	1781.3	0.0551
COG1(C2C2dof)/col-COG1-DAP-Seq(GSE60143)/Homer	DAAAAAGTGA	1	-0.1655	1	1978	0.1271	4201.4	0.1299
PAX6(Paired,Homeobox)/Forebrain-Pax6-ChIP-Seq(GSE66961)/Homer	NGTGTTCAVTSAAGCGKAAA	1	-0.1627	1	120	0.0077	273.9	0.0085
SeqBias: polyC-repeat	CCCCCCCCCC	1	-0.1588	1	15480	0.995	32203.5	0.9955
AT1G01250(AP2EREBP)/col-AT1G01250-DAP-Seq(GSE60143)/Homer	YCACCGACAHTW	1	-0.1512	1	78	0.005	182.5	0.0056
Zic3(Zf)/mES-Zic3-ChIP-Seq(GSE37889)/Homer	GGCCYCCTGCTGDGH	1	-0.1483	1	889	0.0571	1914.3	0.0592
HRE(HSF)/Striatum-HSF1-ChIP-Seq(GSE38000)/Homer	TTCTAGAABNTTCTA	1	-0.1472	1	233	0.015	519.3	0.0161
STOP1(C2H2)/colamp-STOP1-DAP-Seq(GSE60143)/Homer	DTATCTGGKGRAGGT	1	-0.1429	1	496	0.0319	1083	0.0335
Tbx6(T-box)/ESC-Tbx6-ChIP-Seq(GSE93524)/Homer	DAGGTGTBAA	1	-0.1401	1	1427	0.0917	3051.8	0.0943
RRTF1(AP2EREBP)/colamp-RRTF1-DAP-Seq(GSE60143)/Homer	CCGCCGCHATTT	1	-0.1393	1	286	0.0184	634.2	0.0196
ZNF382(Zf)/HEK293-ZNF382.GFP-ChIP-Seq(GSE58341)/Homer	GNCTGTASTRNTGBCTCHTT	1	-0.1337	1	28	0.0018	71.4	0.0022
SOL1(CPP)/colamp-SOL1-DAP-Seq(GSE60143)/Homer	ATTTAAATHN	1	-0.1247	1	1877	0.1206	4003.1	0.1237
HSF3(HSF)/colamp-HSF3-DAP-Seq(GSE60143)/Homer	NTTCTAGAAKCTTCT	1	-0.1226	1	1048	0.0674	2257	0.0698
bHLH28(bHLH)/col-bHLH28-DAP-Seq(GSE60143)/Homer	NHHTGTACGGAH	1	-0.1195	1	259	0.0166	579.8	0.0179
AGL95(ND)/col-AGL95-DAP-Seq(GSE60143)/Homer	TTCTAGAAGCTTCTA	1	-0.1134	1	115	0.0074	267.7	0.0083
Unknown6/Drosophila-Promoters/Homer	AATTTTAAAA	1	-0.1116	1	941	0.0605	2034.1	0.0629
AT1G23810(Orphan)/col-AT1G23810-DAP-Seq(GSE60143)/Homer	TTCTAGAAGSTTCTA	1	-0.1096	1	47	0.003	116.9	0.0036
ANAC062(NAC)/colamp-ANAC062-DAP-Seq(GSE60143)/Homer	TACTTANTNWNYAAG	1	-0.1037	1	407	0.0262	900.5	0.0278
HSFA6B(HSF)/colamp-HSFA6B-DAP-Seq(GSE60143)/Homer	NTTCTAGAANHTTCT	1	-0.103	1	551	0.0354	1208.9	0.0374
SPL5(SBP)/colamp-SPL5-DAP-Seq(GSE60143)/Homer	NNHGTACGGHNN	1	-0.1013	1	467	0.03	1029.8	0.0318
ZNF317(Zf)/HEK293-ZNF317.GFP-ChIP-Seq(GSE58341)/Homer	GTCWGCTGTYYCTCT	1	-0.09795	1	92	0.0059	218.3	0.0067
SeqBias: CG-repeat	CGCGCGCGCG	1	-0.09563	1	3379	0.2172	7168	0.2216
AT2G20110(CPP)/colamp-AT2G20110-DAP-Seq(GSE60143)/Homer	ATTYAAATHY	1	-0.09247	1	1783	0.1146	3819.4	0.1181
Sox6(HMG)/Myotubes-Sox6-ChIP-Seq(GSE32627)/Homer	CCATTGTTNY	1	-0.08443	1	2212	0.1422	4726.1	0.1461
Tbx21(T-box)/GM12878-TBX21-ChIP-Seq(Encode)/Homer	AGGTGTGAAA	1	-0.0844	1	1259	0.0809	2717.5	0.084
LCL1(MYBrelated)/colamp-LCL1-DAP-Seq(GSE60143)/Homer	NAAAATATCTWHWWN	1	-0.08271	1	134	0.0086	313.9	0.0097
Hoxd10(Homeobox)/ChickenMSG-Hoxd10.Flag-ChIP-Seq(GSE86088)/Homer	GGCMATGAAA	1	-0.08243	1	1454	0.0935	3130.9	0.0968
CCA(Myb)/Arabidopsis-CCA.GFP-ChIP-Seq(GSE70533)/Homer	AGATATYTTT	1	-0.07768	1	820	0.0527	1789.6	0.0553
AT1G10720(BSD)/col-AT1G10720-DAP-Seq(GSE60143)/Homer	TTCTAGAAKCTTCTA	1	-0.07533	1	31	0.002	82.8	0.0026
SeqBias: TA-repeat	TATATATATA	1	-0.07394	1	3501	0.225	7438.2	0.2299
ZNF189(Zf)/HEK293-ZNF189.GFP-ChIP-Seq(GSE58341)/Homer	TGGAACAGMA	1	-0.07365	1	1182	0.076	2559.6	0.0791
Pitx1:Ebox(Homeobox,bHLH)/Hindlimb-Pitx1-ChIP-Seq(GSE41591)/Homer	YTAATTRAWWCCAGATGT	1	-0.0722	1	180	0.0116	416.6	0.0129
ZNF165(Zf)/WHIM12-ZNF165-ChIP-Seq(GSE65937)/Homer	AAGGKGRCGCAGGCA	1	-0.07066	1	163	0.0105	379.5	0.0117
CBF2(AP2EREBP)/colamp-CBF2-DAP-Seq(GSE60143)/Homer	YBRCCGACATNNNNN	1	-0.06975	1	461	0.0296	1025.4	0.0317
NTM1(NAC)/col-NTM1-DAP-Seq(GSE60143)/Homer	ACTTRTARAASAAGT	1	-0.0682	1	561	0.0361	1240.9	0.0384
HSFA6A(HSF)/col-HSFA6A-DAP-Seq(GSE60143)/Homer	RGAAGNTTCTAGAAN	1	-0.06799	1	47	0.003	120.8	0.0037
RAP21(AP2EREBP)/colamp-RAP21-DAP-Seq(GSE60143)/Homer	BCACCGACAHNN	1	-0.06578	1	158	0.0102	369.8	0.0114
ZML1(C2C2gata)/colamp-ZML1-DAP-Seq(GSE60143)/Homer	ATCWYRACCGTTSRW	1	-0.06569	1	9	0.0006	29.4	0.0009
TF3A(C2H2)/col-TF3A-DAP-Seq(GSE60143)/Homer	NNDDGAGGAGGWNNN	1	-0.06538	1	1757	0.1129	3779.7	0.1168
CBF1(AP2EREBP)/colamp-CBF1-DAP-Seq(GSE60143)/Homer	YRCCGACATN	1	-0.06099	1	706	0.0454	1553.6	0.048
HSFA1E(HSF)/col-HSFA1E-DAP-Seq(GSE60143)/Homer	TTCTAGAAGCTTCTA	1	-0.05969	1	90	0.0058	219	0.0068
OCT:OCT-short(POU,Homeobox)/NPC-OCT6-ChIP-Seq(GSE43916)/Homer	ATGCATWATGCATRW	1	-0.05918	1	700	0.045	1541	0.0476
MYB39(MYB)/col-MYB39-DAP-Seq(GSE60143)/Homer	WWAARKTAGGTGRAA	1	-0.05914	1	151	0.0097	355.2	0.011
Oct4(POU,Homeobox)/mES-Oct4-ChIP-Seq(GSE11431)/Homer	ATTTGCATAW	1	-0.05745	1	505	0.0325	1124	0.0347
At2g41835(C2H2)/col-At2g41835-DAP-Seq(GSE60143)/Homer	TTTGAAAA	1	-0.05418	1	543	0.0349	1207.4	0.0373
ASL18(LOBAS2)/colamp-ASL18-DAP-Seq(GSE60143)/Homer	CCGGAAAWTCMGGAR	1	-0.05334	1	2392	0.1537	5126.2	0.1585
LIN-15B(Zf)/cElegans-L3-LIN15B-ChIP-Seq(modEncode)/Homer	CARTGGAGCGCRYTTGCATT	1	-0.05295	1	3	0.0002	13.1	0.0004
OBP3(C2C2dof)/col-OBP3-DAP-Seq(GSE60143)/Homer	NYWACTTTTT	1	-0.05122	1	4416	0.2838	9374.3	0.2898
Brn1(POU,Homeobox)/NPC-Brn1-ChIP-Seq(GSE35496)/Homer	TATGCWAATBAV	1	-0.05087	1	337	0.0217	764.8	0.0236
GAGA-repeat/SacCer-Promoters/Homer	CTYTCTYTCTCTCTC	1	-0.05012	1	5993	0.3852	12669.7	0.3917
OCT4-SOX2-TCF-NANOG(POU,Homeobox,HMG)/mES-Oct4-ChIP-Seq(GSE11431)/Homer	ATTTGCATAACAATG	1	-0.04817	1	157	0.0101	371.8	0.0115
EIN3(EIL)/col-EIN3-DAP-Seq(GSE60143)/Homer	ARATTCAATGWATYT	1	-0.04798	1	117	0.0075	282.6	0.0087
GLIS3(Zf)/Thyroid-Glis3.GFP-ChIP-Seq(GSE103297)/Homer	CTCCCTGGGAGGCCN	1	-0.04176	1	2226	0.1431	4787.8	0.148
AT2G28920(ND)/col-AT2G28920-DAP-Seq(GSE60143)/Homer	WAGATATTTWTW	1	-0.04157	1	240	0.0154	556.5	0.0172
DEAR3(AP2EREBP)/colamp-DEAR3-DAP-Seq(GSE60143)/Homer	BCACCGACAWNNNNN	1	-0.04115	1	298	0.0192	683.4	0.0211
Oct4:Sox17(POU,Homeobox,HMG)/F9-Sox17-ChIP-Seq(GSE44553)/Homer	CCATTGTATGCAAAT	1	-0.0409	1	126	0.0081	304.6	0.0094
AT3G09735(S1Falike)/col-AT3G09735-DAP-Seq(GSE60143)/Homer	TTCTAGAANMTTCTA	1	-0.0408	1	450	0.0289	1013.2	0.0313
ZNF692(Zf)/HEK293-ZNF692.GFP-ChIP-Seq(GSE58341)/Homer	GTGGGCCCCA	1	-0.04061	1	156	0.01	371.3	0.0115
ZNF415(Zf)/HEK293-ZNF415.GFP-ChIP-Seq(GSE58341)/Homer	GRTGMTRGAGCC	1	-0.03915	1	772	0.0496	1706.6	0.0528
MGP(C2H2)/colamp-MGP-DAP-Seq(GSE60143)/Homer	TTTTGTCGTTTW	1	-0.0386	1	292	0.0188	672	0.0208
At3g04030(G2like)/col-At3g04030-DAP-Seq(GSE60143)/Homer	DRGAATCT	1	-0.03856	1	1082	0.0695	2368.7	0.0732
MYB40(MYB)/col-MYB40-DAP-Seq(GSE60143)/Homer	TGGTAGGTRARA	1	-0.03838	1	388	0.0249	880.7	0.0272
OCT:OCT(POU,Homeobox)/NPC-Brn1-ChIP-Seq(GSE35496)/Homer	ATGAATATTCATGAG	1	-0.03829	1	4	0.0003	17.8	0.0005
Unknown(Homeobox)/Limb-p300-ChIP-Seq/Homer	SSCMATWAAA	1	-0.03812	1	767	0.0493	1696.7	0.0524
NUC(C2H2)/col-NUC-DAP-Seq(GSE60143)/Homer	HAVAAAACGACAAAA	1	-0.03428	1	110	0.0071	270.3	0.0084
At3g09600(MYBrelated)/colamp-At3g09600-DAP-Seq(GSE60143)/Homer	AAAATATCTT	1	-0.03061	1	433	0.0278	982.7	0.0304
AT4G37180(G2like)/col-AT4G37180-DAP-Seq(GSE60143)/Homer	AGAATCTTNN	1	-0.03019	1	1457	0.0936	3173.3	0.0981
ANL2(HB)/col-ANL2-DAP-Seq(GSE60143)/Homer	CATTAATTGC	1	-0.02841	1	527	0.0339	1187.8	0.0367
DDF2(AP2EREBP)/col-DDF2-DAP-Seq(GSE60143)/Homer	GATGTCGRCR	1	-0.02828	1	28	0.0018	81.8	0.0025
LHY(Myb)/Seedling-LHY-ChIP-Seq(GSE52175)/Homer	ADAAATATCT	1	-0.0261	1	974	0.0626	2149.2	0.0664
At4g28140(AP2EREBP)/colamp-At4g28140-DAP-Seq(GSE60143)/Homer	DCCACCGACCAW	1	-0.02517	1	350	0.0225	805.6	0.0249
TSO1(CPP)/col-TSO1-DAP-Seq(GSE60143)/Homer	RAATTTRAAW	1	-0.02376	1	118	0.0076	292	0.009
At4g32800(AP2EREBP)/colamp-At4g32800-DAP-Seq(GSE60143)/Homer	DYCACCGACAHWWWH	1	-0.02236	1	81	0.0052	208.6	0.0064
MYB4(MYB)/col200-MYB4-DAP-Seq(GSE60143)/Homer	WAGKTAGGTARR	1	-0.02161	1	725	0.0466	1620.8	0.0501
DDF1(AP2EREBP)/col-DDF1-DAP-Seq(GSE60143)/Homer	GCCGACAT	1	-0.02157	1	368	0.0237	847.5	0.0262
IDD2(C2H2)/colamp-IDD2-DAP-Seq(GSE60143)/Homer	HAVAAAAMGACAAAA	1	-0.02119	1	144	0.0093	352.2	0.0109
HRE(HSF)/HepG2-HSF1-ChIP-Seq(GSE31477)/Homer	BSTTCTRGAABVTTCYAGAA	1	-0.02108	1	164	0.0105	397.9	0.0123
MS188(MYB)/colamp-MS188-DAP-Seq(GSE60143)/Homer	WARKTAGGTRRA	1	-0.02071	1	846	0.0544	1881.8	0.0582
Adof1(C2C2dof)/col-Adof1-DAP-Seq(GSE60143)/Homer	NRWAAAGYDV	1	-0.02027	1	3950	0.2539	8445.8	0.2611
MYB10(MYB)/col-MYB10-DAP-Seq(GSE60143)/Homer	YCCACCTACCHH	1	-0.02016	1	456	0.0293	1040.2	0.0322
AT5G05550(Trihelix)/col-AT5G05550-DAP-Seq(GSE60143)/Homer	HDNHDTCKCCGGMGA	1	-0.01917	1	2078	0.1336	4505.2	0.1393
AS2(LOBAS2)/col-AS2-DAP-Seq(GSE60143)/Homer	CCGDAAWWHMCGSCG	1	-0.0178	1	118	0.0076	295.4	0.0091
LBD13(LOBAS2)/colamp-LBD13-DAP-Seq(GSE60143)/Homer	KCCGTNWTTTBCGGC	1	-0.01771	1	1308	0.0841	2873.6	0.0888
AT2G01818(PLATZ)/col-AT2G01818-DAP-Seq(GSE60143)/Homer	TCTAGAABSTTC	1	-0.01752	1	188	0.0121	453.1	0.014
Smad4(MAD)/ESC-SMAD4-ChIP-Seq(GSE29422)/Homer	VBSYGTCTGG	1	-0.01735	1	2684	0.1725	5789.6	0.179
TCP17(TCP)/col-TCP17-DAP-Seq(GSE60143)/Homer	GTGGTCCCCA	1	-0.01676	1	46	0.003	128.1	0.004
At5g62940(C2C2dof)/col-At5g62940-DAP-Seq(GSE60143)/Homer	WHWHHACTTTTT	1	-0.01597	1	4771	0.3067	10177.4	0.3146
ZBTB12(Zf)/HEK293-ZBTB12.GFP-ChIP-Seq(GSE58341)/Homer	NGNTCTAGAACCNGV	1	-0.01595	1	612	0.0393	1383.2	0.0428
AT2G20400(G2like)/colamp-AT2G20400-DAP-Seq(GSE60143)/Homer	DNVGAATATTCBNHN	1	-0.01587	1	107	0.0069	271.2	0.0084
HOXB13(Homeobox)/ProstateTumor-HOXB13-ChIP-Seq(GSE56288)/Homer	TTTTATKRGG	1	-0.01587	1	1306	0.0839	2873	0.0888
At1g36060(AP2EREBP)/colamp-At1g36060-DAP-Seq(GSE60143)/Homer	NNWWKGTCGGTG	1	-0.01462	1	706	0.0454	1588.3	0.0491
AT5G59990(C2C2COlike)/colamp-AT5G59990-DAP-Seq(GSE60143)/Homer	TCTCAACCGTTCATT	1	-0.01455	1	21	0.0013	67.5	0.0021
AT4G27900(C2C2COlike)/col-AT4G27900-DAP-Seq(GSE60143)/Homer	TCTCVACCGTTSATT	1	-0.01405	1	2	0.0001	13.1	0.0004
AT1G47655(C2C2dof)/colamp-AT1G47655-DAP-Seq(GSE60143)/Homer	YHACTTTTTS	1	-0.01332	1	5054	0.3248	10778.6	0.3332
AT1G76870(Trihelix)/col-AT1G76870-DAP-Seq(GSE60143)/Homer	AAAACCRGWW	1	-0.01262	1	458	0.0294	1053.7	0.0326
HSFB4(HSF)/col-HSFB4-DAP-Seq(GSE60143)/Homer	TTCTAGAAGCTTCTA	1	-0.0125	1	37	0.0024	108.3	0.0033
AP-2gamma(AP2)/MCF7-TFAP2C-ChIP-Seq(GSE21234)/Homer	SCCTSAGGSCAW	1	-0.01217	1	1590	0.1022	3485	0.1077
At1g75490(AP2EREBP)/colamp-At1g75490-DAP-Seq(GSE60143)/Homer	CACCGMCT	1	-0.01205	1	2539	0.1632	5497.4	0.1699
Oct2(POU,Homeobox)/Bcell-Oct2-ChIP-Seq(GSE21512)/Homer	ATATGCAAAT	1	-0.0115	1	297	0.0191	701.9	0.0217
CBF4(AP2EREBP)/colamp-CBF4-DAP-Seq(GSE60143)/Homer	NRCCGACDWNNNNNN	1	-0.008089	1	672	0.0432	1527.9	0.0472
At5g29000(G2like)/col-At5g29000-DAP-Seq(GSE60143)/Homer	RGAATATTCYHH	1	-0.007937	1	222	0.0143	539.3	0.0167
Unknown2/Drosophila-Promoters/Homer	CATCMCTA	1	-0.007254	1	1833	0.1178	4018.2	0.1242
ANAC004(NAC)/colamp-ANAC004-DAP-Seq(GSE60143)/Homer	WNCTTVYNNNRBAAG	1	-0.007079	1	382	0.0246	896.2	0.0277
dof45(C2C2dof)/col-dof45-DAP-Seq(GSE60143)/Homer	NVAWAAAGTN	1	-0.006354	1	3570	0.2295	7696.7	0.2379
HSFB3(HSF)/colamp-HSFB3-DAP-Seq(GSE60143)/Homer	TTCTAGAAGMTTHTW	1	-0.006177	1	66	0.0042	183.6	0.0057
At1g19210(AP2EREBP)/colamp-At1g19210-DAP-Seq(GSE60143)/Homer	HCACCGACCAHN	1	-0.00605	1	1532	0.0985	3382.4	0.1046
CBF3(AP2EREBP)/colamp-CBF3-DAP-Seq(GSE60143)/Homer	YNRCCGACATNN	1	-0.005867	1	457	0.0294	1064.6	0.0329
At1g25550(G2like)/colamp-At1g25550-DAP-Seq(GSE60143)/Homer	NAGATTCY	1	-0.005849	1	1273	0.0818	2829.4	0.0875
CArG(MADS)/PUER-Srf-ChIP-Seq(Sullivan_et_al.)/Homer	CCATATATGGNM	1	-0.005717	1	311	0.02	742.1	0.0229
KAN2(G2like)/colamp-KAN2-DAP-Seq(GSE60143)/Homer	ATATTCTY	1	-0.005609	1	1487	0.0956	3288.8	0.1017
At5g08750(C3H)/col-At5g08750-DAP-Seq(GSE60143)/Homer	NWDTTGCGGCTR	1	-0.005382	1	549	0.0353	1267.9	0.0392
Tal1	CATCTG	1	-0.004895	1	1919	0.1233	4213.1	0.1302
At5g65130(AP2EREBP)/colamp-At5g65130-DAP-Seq(GSE60143)/Homer	CCRCCGACAWTN	1	-0.004294	1	329	0.0211	786.6	0.0243
At2g44940(AP2EREBP)/colamp-At2g44940-DAP-Seq(GSE60143)/Homer	NYACCGACAHNNNNN	1	-0.004069	1	167	0.0107	422.6	0.0131
AP-2alpha(AP2)/Hela-AP2alpha-ChIP-Seq(GSE31477)/Homer	ATGCCCTGAGGC	1	-0.003486	1	1185	0.0762	2653.2	0.082
AT3G60490(AP2EREBP)/colamp-AT3G60490-DAP-Seq(GSE60143)/Homer	NNRCCGACANNNNNN	1	-0.003111	1	237	0.0152	584.5	0.0181
Eomes(T-box)/H9-Eomes-ChIP-Seq(GSE26097)/Homer	ATTAACACCT	1	-0.00304	1	2795	0.1797	6087.9	0.1882
TRP2(MYBrelated)/colamp-TRP2-DAP-Seq(GSE60143)/Homer	TAAACCCT	1	-0.002778	1	217	0.0139	540.6	0.0167
Pbx3(Homeobox)/GM12878-PBX3-ChIP-Seq(GSE32465)/Homer	SCTGTCAMTCAN	1	-0.002774	1	308	0.0198	746	0.0231
Ascl1(bHLH)/NeuralTubes-Ascl1-ChIP-Seq(GSE55840)/Homer	NNVVCAGCTGBN	1	-0.002731	1	2382	0.1531	5215.7	0.1612
KANADI1(Myb)/Seedling-KAN1-ChIP-Seq(GSE48081)/Homer	ARGAATAWWN	1	-0.002618	1	1246	0.0801	2791.6	0.0863
T1ISRE(IRF)/ThioMac-Ifnb-Expression/Homer	ACTTTCGTTTCT	1	-0.002499	1	10	0.0006	44.1	0.0014
ZNF143|STAF(Zf)/CUTLL-ZNF143-ChIP-Seq(GSE29600)/Homer	ATTTCCCAGVAKSCY	1	-0.002351	1	523	0.0336	1224	0.0378
At5g04390(C2H2)/col200-At5g04390-DAP-Seq(GSE60143)/Homer	AGTGANDN	1	-0.002347	1	8835	0.5679	18732	0.5791
At3g45610(C2C2dof)/col-At3g45610-DAP-Seq(GSE60143)/Homer	TWACTTTTTS	1	-0.002253	1	2090	0.1343	4600.8	0.1422
TINY(AP2EREBP)/col-TINY-DAP-Seq(GSE60143)/Homer	NNCACCGACA	1	-0.002188	1	222	0.0143	554.2	0.0171
Hoxa11(Homeobox)/ChickenMSG-Hoxa11.Flag-ChIP-Seq(GSE86088)/Homer	TTTTATGGCM	1	-0.001459	1	3043	0.1956	6636.4	0.2052
JKD(C2H2)/col-JKD-DAP-Seq(GSE60143)/Homer	TTTTGTCGTTTT	1	-0.001228	1	184	0.0118	474	0.0147
AT5G45580(G2like)/colamp-AT5G45580-DAP-Seq(GSE60143)/Homer	ADRGAATCTH	1	-0.001168	1	1842	0.1184	4089	0.1264
SFP1/SacCer-Promoters/Homer	DDAAAAATTTTY	1	-0.001057	1	54	0.0035	165.1	0.0051
At5g08330(TCP)/col-At5g08330-DAP-Seq(GSE60143)/Homer	GGRCCCAC	1	-0.001049	1	780	0.0501	1801.4	0.0557
GLI3(Zf)/Limb-GLI3-ChIP-Chip(GSE11077)/Homer	CGTGGGTGGTCC	1	-0.001045	1	128	0.0082	344.2	0.0106
CDX4(Homeobox)/ZebrafishEmbryos-Cdx4.Myc-ChIP-Seq(GSE48254)/Homer	NGYCATAAAWCH	1	-0.000989	1	1012	0.065	2307.3	0.0713
SEP3(MADS)/Arabidoposis-Flower-Sep3-ChIP-Seq/Homer	CCAAAAAGGG	1	-0.000955	1	1427	0.0917	3204.3	0.0991
RUNX(Runt)/HPC7-Runx1-ChIP-Seq(GSE22178)/Homer	SAAACCACAG	1	-0.000827	1	997	0.0641	2278.2	0.0704
HSF21(HSF)/col-HSF21-DAP-Seq(GSE60143)/Homer	CTTCTAGAAGMTTYW	1	-0.000722	1	97	0.0062	273.2	0.0084
At1g68670(G2like)/colamp-At1g68670-DAP-Seq(GSE60143)/Homer	WNWWHNRAAGATTCT	1	-0.000646	1	452	0.0291	1086.7	0.0336
RAV1(RAV)/colamp-RAV1-DAP-Seq(GSE60143)/Homer	TWWTTTCTGTTG	1	-0.000635	1	1002	0.0644	2294.1	0.0709
RLR1?/SacCer-Promoters/Homer	WTTTTCYYTTTT	1	-0.00063	1	916	0.0589	2107.7	0.0652
At1g77640(AP2EREBP)/col-At1g77640-DAP-Seq(GSE60143)/Homer	TGTCGGTGGA	1	-0.000599	1	194	0.0125	503.5	0.0156
LOB(LOBAS2)/col-LOB-DAP-Seq(GSE60143)/Homer	CGCCGKAWWTTHCGS	1	-0.000589	1	359	0.0231	879.8	0.0272
TCP20(TCP)/col-TCP20-DAP-Seq(GSE60143)/Homer	GGDCCCAC	1	-0.00057	1	436	0.028	1052.3	0.0325
RUNX-AML(Runt)/CD4+-PolII-ChIP-Seq(Barski_et_al.)/Homer	GCTGTGGTTW	1	-0.000549	1	924	0.0594	2127.8	0.0658
PRDM10(Zf)/HEK293-PRDM10.eGFP-ChIP-Seq(Encode)/Homer	TGGTACATTCCA	1	-0.000457	1	736	0.0473	1719.4	0.0532
Rfx5(HTH)/GM12878-Rfx5-ChIP-Seq(GSE31477)/Homer	SCCTAGCAACAG	1	-0.000422	1	479	0.0308	1152.9	0.0356
TATA-box/Drosophila-Promoters/Homer	CTATAAAAGCSV	1	-0.000328	1	74	0.0048	223	0.0069
bHLH10(bHLH)/colamp-bHLH10-DAP-Seq(GSE60143)/Homer	YACCGACA	1	-0.000307	1	241	0.0155	618.2	0.0191
MYB63(MYB)/col-MYB63-DAP-Seq(GSE60143)/Homer	BHYACCWACCHH	1	-0.000304	1	543	0.0349	1299	0.0402
At1g69690(TCP)/colamp-At1g69690-DAP-Seq(GSE60143)/Homer	NHGTGGGGCCCACHW	1	-0.000301	1	247	0.0159	632.9	0.0196
PTF1(TCP)/colamp-PTF1-DAP-Seq(GSE60143)/Homer	RDDGGGACCACA	1	-0.000248	1	85	0.0055	251.6	0.0078
MYB58(MYB)/colamp-MYB58-DAP-Seq(GSE60143)/Homer	YYYACCWACC	1	-0.000248	1	1163	0.0748	2662.5	0.0823
Smad2(MAD)/ES-SMAD2-ChIP-Seq(GSE29422)/Homer	CTGTCTGG	1	-0.000227	1	2509	0.1613	5557	0.1718
AT5G02460(C2C2dof)/col-AT5G02460-DAP-Seq(GSE60143)/Homer	CHCCTTTT	1	-0.000211	1	2890	0.1858	6369.1	0.1969
MYB49(MYB)/col-MYB49-DAP-Seq(GSE60143)/Homer	ARKTAGGTRR	1	-0.0002	1	1244	0.08	2842.5	0.0879
Hoxd13(Homeobox)/ChickenMSG-Hoxd13.Flag-ChIP-Seq(GSE86088)/Homer	NCYAATAAAA	1	-0.000178	1	1979	0.1272	4429.8	0.1369
At3g12730(G2like)/colamp-At3g12730-DAP-Seq(GSE60143)/Homer	AAGATTCT	1	-0.000159	1	1673	0.1075	3774.9	0.1167
PSE(SNAPc)/K562-mStart-Seq/Homer	WAVTCACCMTAASYDAAAAG	1	-0.000141	1	571	0.0367	1372.3	0.0424
Hoxd12(Homeobox)/ChickenMSG-Hoxd12.Flag-ChIP-Seq(GSE86088)/Homer	HDGYAATGAAAN	1	-0.000141	1	2307	0.1483	5137.5	0.1588
AT1G28160(AP2EREBP)/colamp-AT1G28160-DAP-Seq(GSE60143)/Homer	GGCGGCGG	1	-0.000128	1	2941	0.189	6491.7	0.2007
bcd(Homeobox)/Embryo-Bcd-ChIP-Seq(GSE86966)/Homer	VNNGGATTADNN	1	-0.000128	1	1510	0.0971	3427.2	0.1059
MYB67(MYB)/col-MYB67-DAP-Seq(GSE60143)/Homer	YYYACCTAAC	1	-0.000105	1	1123	0.0722	2591.2	0.0801
IDD4(C2H2)/col-IDD4-DAP-Seq(GSE60143)/Homer	TTTGTCTTTWTB	1	-0.000103	1	1410	0.0906	3215.7	0.0994
OBP1(C2C2dof)/col-OBP1-DAP-Seq(GSE60143)/Homer	NHHACTTTWT	1	-8.5e-05	1	3986	0.2562	8717.9	0.2695
MYB92(MYB)/colamp-MYB92-DAP-Seq(GSE60143)/Homer	GGTAGGTR	1	-8.4e-05	1	1235	0.0794	2839.6	0.0878
HSFC1(HSF)/col-HSFC1-DAP-Seq(GSE60143)/Homer	HTTCTAGAADCTTCT	1	-8.3e-05	1	195	0.0125	523.5	0.0162
Hoxd11(Homeobox)/ChickenMSG-Hoxd11.Flag-ChIP-Seq(GSE86088)/Homer	VGCCATAAAA	1	-8.2e-05	1	3125	0.2009	6894.5	0.2131
AT1G04880(ARID)/colamp-AT1G04880-DAP-Seq(GSE60143)/Homer	AAACTATATADTATA	1	-7.4e-05	1	65	0.0042	208.5	0.0064
HINFP(Zf)/K562-HINFP.eGFP-ChIP-Seq(Encode)/Homer	TWVGGTCCGC	1	-7.2e-05	1	579	0.0372	1399.7	0.0433
AT3G16280(AP2EREBP)/colamp-AT3G16280-DAP-Seq(GSE60143)/Homer	HCACCGACAHHDHHN	1	-6.4e-05	1	295	0.019	758	0.0234
MYB51(MYB)/col-MYB51-DAP-Seq(GSE60143)/Homer	GGTAGGTG	1	-5.8e-05	1	1082	0.0695	2512.3	0.0777
EGL-5(Homeobox)/cElegans-L3-EGL5-ChIP-Seq(modEncode)/Homer	ATTTAATGGG	1	-5.7e-05	1	1675	0.1077	3801	0.1175
Znf263(Zf)/K562-Znf263-ChIP-Seq(GSE31477)/Homer	CVGTSCTCCC	1	-5.2e-05	1	2752	0.1769	6112.3	0.1889
Oct6(POU,Homeobox)/NPC-Pou3f1-ChIP-Seq(GSE35496)/Homer	WATGCAAATGAG	1	-4.8e-05	1	411	0.0264	1026.6	0.0317
MYB55(MYB)/colamp-MYB55-DAP-Seq(GSE60143)/Homer	YACCWAMC	1	-4.8e-05	1	1324	0.0851	3043.9	0.0941
ANAC005(NAC)/col-ANAC005-DAP-Seq(GSE60143)/Homer	WVCTTVTWNHABAAG	1	-4.7e-05	1	506	0.0325	1241.2	0.0384
HEB(bHLH)/mES-Heb-ChIP-Seq(GSE53233)/Homer	VCAGCTGBNN	1	-4e-05	1	3056	0.1964	6766.6	0.2092
AT1G12630(AP2EREBP)/colamp-AT1G12630-DAP-Seq(GSE60143)/Homer	TGTCGGCA	1	-3.9e-05	1	466	0.03	1153.9	0.0357
SCL(bHLH)/HPC7-Scl-ChIP-Seq(GSE13511)/Homer	AVCAGCTG	1	-3.8e-05	1	6941	0.4461	14942.1	0.4619
MYB99(MYB)/colamp-MYB99-DAP-Seq(GSE60143)/Homer	GGTAGGTG	1	-3.4e-05	1	1102	0.0708	2565.5	0.0793
MYB74(MYB)/colamp-MYB74-DAP-Seq(GSE60143)/Homer	YYYACCTACCWH	1	-3.4e-05	1	687	0.0442	1650.6	0.051
RUNX1(Runt)/Jurkat-RUNX1-ChIP-Seq(GSE29180)/Homer	AAACCACARM	1	-3.3e-05	1	1399	0.0899	3213.6	0.0993
CEJ1(AP2EREBP)/col-CEJ1-DAP-Seq(GSE60143)/Homer	WWTGTCGGTG	1	-2e-05	1	1052	0.0676	2464.6	0.0762
AT2G40260(G2like)/colamp-AT2G40260-DAP-Seq(GSE60143)/Homer	WAAAYATTCTTT	1	-1.6e-05	1	1766	0.1135	4023.3	0.1244
Otx2(Homeobox)/EpiLC-Otx2-ChIP-Seq(GSE56098)/Homer	NYTAATCCYB	1	-1.3e-05	1	1043	0.067	2451.8	0.0758
MYB44(MYB)/colamp-MYB44-DAP-Seq(GSE60143)/Homer	CVGTTWWKTCNGTTA	1	-1.2e-05	1	100	0.0064	307.2	0.0095
Rap210(AP2EREBP)/col-Rap210-DAP-Seq(GSE60143)/Homer	TGTCGGCA	1	-1e-05	1	528	0.0339	1309.7	0.0405
At1g22810(AP2EREBP)/colamp-At1g22810-DAP-Seq(GSE60143)/Homer	BCACCGACANNN	1	-8e-06	1	421	0.0271	1068	0.033
HAP3(CCAATHAP3)/col-HAP3-DAP-Seq(GSE60143)/Homer	TGATGGAW	1	-8e-06	1	325	0.0209	848.7	0.0262
HOXD13(Homeobox)/Chicken-Hoxd13-ChIP-Seq(GSE38910)/Homer	NCYAATAAAA	1	-7e-06	1	1227	0.0789	2866	0.0886
AT1G77200(AP2EREBP)/colamp-AT1G77200-DAP-Seq(GSE60143)/Homer	ACCGACAHWD	1	-6e-06	1	768	0.0494	1854.8	0.0573
Bapx1(Homeobox)/VertebralCol-Bapx1-ChIP-Seq(GSE36672)/Homer	TTRAGTGSYK	1	-3e-06	1	3295	0.2118	7335.4	0.2268
NGA4(ABI3VP1)/col-NGA4-DAP-Seq(GSE60143)/Homer	TKNTCAGGTG	1	-2e-06	1	3887	0.2498	8601.1	0.2659
MYB17(MYB)/colamp-MYB17-DAP-Seq(GSE60143)/Homer	GGTAGGTGRG	1	-2e-06	1	679	0.0436	1667.2	0.0515
MYB30(MYB)/colamp-MYB30-DAP-Seq(GSE60143)/Homer	AGGTAGTTGG	1	-2e-06	1	1403	0.0902	3269.4	0.1011
PRDM9(Zf)/Testis-DMC1-ChIP-Seq(GSE35498)/Homer	ADGGYAGYAGCATCT	1	-2e-06	1	488	0.0314	1237.7	0.0383
At5g18450(AP2EREBP)/col-At5g18450-DAP-Seq(GSE60143)/Homer	CACCGCTT	1	-2e-06	1	2472	0.1589	5590	0.1728
Nkx3.1(Homeobox)/LNCaP-Nkx3.1-ChIP-Seq(GSE28264)/Homer	AAGCACTTAA	1	-1e-06	1	3522	0.2264	7838.3	0.2423
At1g72010(TCP)/colamp-At1g72010-DAP-Seq(GSE60143)/Homer	GGDCCCAC	1	-1e-06	1	595	0.0382	1486.7	0.046
caudal(Homeobox)/Drosophila-Embryos-ChIP-Chip(modEncode)/Homer	GGYCATAAAW	1	-1e-06	1	832	0.0535	2019.9	0.0624
DEAR2(AP2EREBP)/colamp-DEAR2-DAP-Seq(GSE60143)/Homer	HCACCGACAWHD	1	-1e-06	1	1171	0.0753	2772	0.0857
AT4G26030(C2H2)/col-AT4G26030-DAP-Seq(GSE60143)/Homer	BYYACCWACY	1	-1e-06	1	1175	0.0755	2785.4	0.0861
E2A(bHLH)/proBcell-E2A-ChIP-Seq(GSE21978)/Homer	DNRCAGCTGY	1	-1e-06	1	2263	0.1455	5160.3	0.1595
At2g03500(G2like)/col-At2g03500-DAP-Seq(GSE60143)/Homer	WWAGAATATTCT	1	0	1	167	0.0107	494.5	0.0153
Zac1(Zf)/Neuro2A-Plagl1-ChIP-Seq(GSE75942)/Homer	HAWGRGGCCM	1	0	1	3970	0.2552	8826	0.2728
Cdx2(Homeobox)/mES-Cdx2-ChIP-Seq(GSE14586)/Homer	GYMATAAAAH	1	0	1	736	0.0473	1820.6	0.0563
AT1G44830(AP2EREBP)/col-AT1G44830-DAP-Seq(GSE60143)/Homer	NCCACCGACA	1	0	1	345	0.0222	925.3	0.0286
TCP7(TCP)/col-TCP7-DAP-Seq(GSE60143)/Homer	GTGGGSCCCACHHNN	1	0	1	553	0.0355	1408.1	0.0435
Nkx2.2(Homeobox)/NPC-Nkx2.2-ChIP-Seq(GSE61673)/Homer	BTBRAGTGSN	1	0	1	2791	0.1794	6322.8	0.1955
MYB96(MYB)/colamp-MYB96-DAP-Seq(GSE60143)/Homer	WGGTRGTTGG	1	0	1	1142	0.0734	2735.4	0.0846
ERF38(AP2EREBP)/col-ERF38-DAP-Seq(GSE60143)/Homer	CACCGACA	1	0	1	436	0.028	1142.6	0.0353
At4g31060(AP2EREBP)/colamp-At4g31060-DAP-Seq(GSE60143)/Homer	CACCGACAAW	1	0	1	341	0.0219	923.8	0.0286
ZML2(C2C2gata)/col-ZML2-DAP-Seq(GSE60143)/Homer	CATCATCATC	1	0	1	198	0.0127	581.7	0.018
ERF9(AP2EREBP)/colamp-ERF9-DAP-Seq(GSE60143)/Homer	AWATGGCGGCGG	1	0	1	513	0.033	1326	0.041
MYB107(MYB)/col-MYB107-DAP-Seq(GSE60143)/Homer	RGTWGGTRRR	1	0	1	2063	0.1326	4766.4	0.1473
Zelda(Zf)/Embryo-zld-ChIP-Seq(GSE65441)/Homer	KBCTACCTGW	1	0	1	580	0.0373	1483.1	0.0458
At4g16750(AP2EREBP)/col-At4g16750-DAP-Seq(GSE60143)/Homer	HACCGACAHA	1	0	1	711	0.0457	1785.2	0.0552
DREB26(AP2EREBP)/col-DREB26-DAP-Seq(GSE60143)/Homer	CCACCGACAH	1	0	1	245	0.0157	703.9	0.0218
AT2G38300(G2like)/col-AT2G38300-DAP-Seq(GSE60143)/Homer	ADRGAATGTT	1	0	1	1445	0.0929	3427.4	0.106
IDD5(C2H2)/colamp-IDD5-DAP-Seq(GSE60143)/Homer	TTTTGTCTTTTTBTK	1	0	1	1127	0.0724	2728.6	0.0844
MYB3(MYB)/Arabidopsis-MYB3-ChIP-Seq(GSE80564)/Homer	GKTAGGTRGG	1	0	1	2303	0.148	5308.7	0.1641
AT5G23930(mTERF)/col-AT5G23930-DAP-Seq(GSE60143)/Homer	GGCGGCTG	1	0	1	2886	0.1855	6574.6	0.2032
MYB94(MYB)/col-MYB94-DAP-Seq(GSE60143)/Homer	WGGTRGTTGGKA	1	0	1	454	0.0292	1210.2	0.0374
ERF115(AP2EREBP)/colamp-ERF115-DAP-Seq(GSE60143)/Homer	WTKRCGGCGB	1	0	1	2334	0.15	5396.1	0.1668
ATY13(MYB)/col-ATY13-DAP-Seq(GSE60143)/Homer	YYYAACYRHH	1	0	1	4773	0.3068	10615.5	0.3282
ERF105(AP2EREBP)/colamp-ERF105-DAP-Seq(GSE60143)/Homer	TGGCGGCT	1	0	1	2251	0.1447	5220.7	0.1614
TCP1(TCP)/col-TCP1-DAP-Seq(GSE60143)/Homer	GGGGGCCCMMCN	1	0	1	274	0.0176	792.3	0.0245
MYB93(MYB)/colamp-MYB93-DAP-Seq(GSE60143)/Homer	GGTAGGTGRD	1	0	1	1390	0.0893	3345.9	0.1034
Ptf1a(bHLH)/Panc1-Ptf1a-ChIP-Seq(GSE47459)/Homer	ACAGCTGTTN	1	0	1	4170	0.268	9370	0.2897
TCP16(TCP)/colamp-TCP16-DAP-Seq(GSE60143)/Homer	GTGGDCCYNNNNNNN	1	0	1	733	0.0471	1878.3	0.0581
ATY19(MYB)/col-ATY19-DAP-Seq(GSE60143)/Homer	YYCACCWACCAT	1	0	1	845	0.0543	2138.6	0.0661
MYB13(MYB)/col-MYB13-DAP-Seq(GSE60143)/Homer	HYCACCWACCHH	1	0	1	780	0.0501	1990.8	0.0615
ERF15(AP2EREBP)/colamp-ERF15-DAP-Seq(GSE60143)/Homer	WDHAGCMGCCAT	1	0	1	3347	0.2151	7627.2	0.2358
RUNX2(Runt)/PCa-RUNX2-ChIP-Seq(GSE33889)/Homer	NWAACCACADNN	1	0	1	1100	0.0707	2732.4	0.0845
Pit1(Homeobox)/GCrat-Pit1-ChIP-Seq(GSE58009)/Homer	ATGMATATDC	1	0	1	1071	0.0688	2675.4	0.0827
Nkx2.5(Homeobox)/HL1-Nkx2.5.biotin-ChIP-Seq(GSE21529)/Homer	RRSCACTYAA	1	0	1	3100	0.1993	7135.5	0.2206
AT1G71450(AP2EREBP)/col-AT1G71450-DAP-Seq(GSE60143)/Homer	DHDWTGTCGGTG	1	0	1	1997	0.1284	4742.2	0.1466
SHN3(AP2EREBP)/col-SHN3-DAP-Seq(GSE60143)/Homer	CCGCCGCC	1	0	1	784	0.0504	2037.3	0.063
TATA-Box(TBP)/Promoter/Homer	CCTTTTAWAGSC	1	0	1	1503	0.0966	3663.2	0.1132
ERF73(AP2EREBP)/col-ERF73-DAP-Seq(GSE60143)/Homer	CCGCCGCC	1	0	1	1336	0.0859	3291.5	0.1018
At2g01060(G2like)/colamp-At2g01060-DAP-Seq(GSE60143)/Homer	AGATKCBNWW	1	0	1	3800	0.2442	8673.8	0.2681
PUCHI(AP2EREBP)/colamp-PUCHI-DAP-Seq(GSE60143)/Homer	GCGCCGTY	1	0	1	1327	0.0853	3279.7	0.1014
CRF10(AP2EREBP)/col100-CRF10-DAP-Seq(GSE60143)/Homer	DCCGCCGYHA	1	0	1	2003	0.1287	4794.2	0.1482
OCT:OCT(POU,Homeobox)/NPC-OCT6-ChIP-Seq(GSE43916)/Homer	YATGCATATRCATRT	1	0	1	111	0.0071	417.5	0.0129
AT3G57600(AP2EREBP)/col-AT3G57600-DAP-Seq(GSE60143)/Homer	GGCGGTGG	1	0	1	1314	0.0845	3263.2	0.1009
ERF13(AP2EREBP)/colamp-ERF13-DAP-Seq(GSE60143)/Homer	TYAGCCGCCATT	1	0	1	1644	0.1057	4012.2	0.124
ASHR1(ND)/col-ASHR1-DAP-Seq(GSE60143)/Homer	NTGGTGAN	1	0	1	1635	0.1051	3994.1	0.1235
ABR1(AP2EREBP)/colamp-ABR1-DAP-Seq(GSE60143)/Homer	AAATGGCGGCGG	1	0	1	1358	0.0873	3376.8	0.1044
At2g33710(AP2EREBP)/colamp-At2g33710-DAP-Seq(GSE60143)/Homer	WTKGCGGCKR	1	0	1	2662	0.1711	6257.6	0.1934
ERF8(AP2EREBP)/colamp-ERF8-DAP-Seq(GSE60143)/Homer	CGCCGYCATW	1	0	1	1584	0.1018	3884.9	0.1201
ESE3(AP2EREBP)/col-ESE3-DAP-Seq(GSE60143)/Homer	GACGGTGG	1	0	1	2047	0.1316	4911.3	0.1518
At1g14580(C2H2)/colamp-At1g14580-DAP-Seq(GSE60143)/Homer	CASAAAAMGACAAAA	1	0	1	276	0.0177	855.8	0.0265
ERF1(AP2EREBP)/colamp-ERF1-DAP-Seq(GSE60143)/Homer	GGCGGCTR	1	0	1	1157	0.0744	2932.9	0.0907
MYB61(MYB)/colamp-MYB61-DAP-Seq(GSE60143)/Homer	HCYACCTACC	1	0	1	1842	0.1184	4469.9	0.1382
AT4G18450(AP2EREBP)/col-AT4G18450-DAP-Seq(GSE60143)/Homer	ATGGCGGCKG	1	0	1	755	0.0485	2012.4	0.0622
Unknown4/Arabidopsis-Promoters/Homer	CKTCKTCTTY	1	0	1	1088	0.0699	2782.8	0.086
MYB83(MYB)/colamp-MYB83-DAP-Seq(GSE60143)/Homer	CACCAACCWH	1	0	1	2203	0.1416	5278.5	0.1632
At3g24120(G2like)/col-At3g24120-DAP-Seq(GSE60143)/Homer	NWWAGMATMW	1	0	1	4095	0.2632	9380.5	0.29
LEP(AP2EREBP)/col-LEP-DAP-Seq(GSE60143)/Homer	CDCCGCCGTC	1	0	1	576	0.037	1599.7	0.0495
AT1G24250(Orphan)/col-AT1G24250-DAP-Seq(GSE60143)/Homer	KTDGTTGGTDGTTGG	1	0	1	417	0.0268	1223	0.0378
Nkx2.1(Homeobox)/LungAC-Nkx2.1-ChIP-Seq(GSE43252)/Homer	RSCACTYRAG	1	0	1	4264	0.2741	9763.7	0.3018
ERF104(AP2EREBP)/col-ERF104-DAP-Seq(GSE60143)/Homer	GGCGGCGG	1	0	1	1701	0.1093	4187.2	0.1294
RAP26(AP2EREBP)/colamp-RAP26-DAP-Seq(GSE60143)/Homer	HDATGGCGGCGG	1	0	1	1732	0.1113	4258.3	0.1316
ERF5(AP2EREBP)/colamp-ERF5-DAP-Seq(GSE60143)/Homer	DCMGCCGCCA	1	0	1	815	0.0524	2187.1	0.0676
ZEB2(Zf)/SNU398-ZEB2-ChIP-Seq(GSE103048)/Homer	GNMCAGGTGTGC	1	0	1	1393	0.0895	3524.3	0.1089
ERF2(AP2EREBP)/colamp-ERF2-DAP-Seq(GSE60143)/Homer	GGCGGCTG	1	0	1	1294	0.0832	3309.8	0.1023
ERF3(AP2EREBP)/colamp-ERF3-DAP-Seq(GSE60143)/Homer	ATGGCGGCGG	1	0	1	1067	0.0686	2801.3	0.0866
TATA-box/SacCer-Promoters/Homer	BBHWTATATA	1	0	1	404	0.026	1222.1	0.0378
E2A(bHLH),near_PU.1/Bcell-PU.1-ChIP-Seq(GSE21512)/Homer	NVCACCTGBN	1	0	1	2048	0.1316	5258.9	0.1626
LRF(Zf)/Erythroblasts-ZBTB7A-ChIP-Seq(GSE74977)/Homer	AAGACCCYYN	1	0	1	1823	0.1172	5314.5	0.1643
Slug(Zf)/Mesoderm-Snai2-ChIP-Seq(GSE61475)/Homer	SNGCACCTGCHS	1	0	1	767	0.0493	2122.5	0.0656
ZEB1(Zf)/PDAC-ZEB1-ChIP-Seq(GSE64557)/Homer	VCAGGTRDRY	1	0	1	2530	0.1626	6237.2	0.1928
ARF2(ARF)/col-ARF2-DAP-Seq(GSE60143)/Homer	TTGTCGGMWN	1	0	1	4318	0.2775	10055.1	0.3108
AT4G12670(MYBrelated)/col-AT4G12670-DAP-Seq(GSE60143)/Homer	AGGGTTTAGGGTTTA	1	0	1	0	0	0.8	0
CRF4(AP2EREBP)/colamp-CRF4-DAP-Seq(GSE60143)/Homer	CGCCGCCA	1	0	1	1079	0.0694	2943.3	0.091
ERF10(AP2EREBP)/col-ERF10-DAP-Seq(GSE60143)/Homer	RTGGCGGCGG	1	0	1	1142	0.0734	3152.1	0.0974
ERF11(AP2EREBP)/col-ERF11-DAP-Seq(GSE60143)/Homer	RTGGCGGCGG	1	0	1	1323	0.085	3455.2	0.1068
ERF4(AP2EREBP)/colamp-ERF4-DAP-Seq(GSE60143)/Homer	WDWTGGCGGCGG	1	0	1	1490	0.0958	3804.6	0.1176
ERF7(AP2EREBP)/col-ERF7-DAP-Seq(GSE60143)/Homer	ATGRCGGCGG	1	0	1	1906	0.1225	4796.8	0.1483
ESE1(AP2EREBP)/col-ESE1-DAP-Seq(GSE60143)/Homer	GGCGGCGG	1	0	1	1404	0.0902	3609.7	0.1116
RAP212(AP2EREBP)/col-RAP212-DAP-Seq(GSE60143)/Homer	CGCCGCCATTTT	1	0	1	1111	0.0714	2927.5	0.0905
REM16(ABI3VP1)/col-REM16-DAP-Seq(GSE60143)/Homer	DTTTTTSCCGSMAAA	1	0	1	0	0	2.4	0.0001
TCP3(TCP)/colamp-TCP3-DAP-Seq(GSE60143)/Homer	WGTGGTCCCAAHWWW	1	0	1	214	0.0138	779	0.0241

## Sheet: COUP-TFII_All_Diff_Enriched
Motif Name	Consensus	P-value	Log P-value	q-value (Benjamini)	# of Target Sequences with Motif(of 31736)	% of Target Sequences with Motif	# of Background Sequences with Motif(of 31389)	% of Background Sequences with Motif
COUP-TFII(NR)/K562-NR2F1-ChIP-Seq(Encode)/Homer	GKBCARAGGTCA	1e-910	-2096	0	8940	0.2817	4441.6	0.1415
EAR2(NR)/K562-NR2F6-ChIP-Seq(Encode)/Homer	NRBCARRGGTCA	1e-848	-1954	0	8384	0.2642	4152.8	0.1323
COUP-TFII(NR)/Artia-Nr2f2-ChIP-Seq(GSE46497)/Homer	AGRGGTCA	1e-836	-1926	0	10101	0.3183	5487.5	0.1748
TR4(NR),DR1/Hela-TR4-ChIP-Seq(GSE24685)/Homer	GAGGTCAAAGGTCA	1e-615	-1417	0	1745	0.055	353.8	0.0113
PPARa(NR),DR1/Liver-Ppara-ChIP-Seq(GSE47954)/Homer	VNAGGKCAAAGGTCA	1e-597	-1376	0	6246	0.1968	3100.9	0.0988
HNF4a(NR),DR1/HepG2-HNF4a-ChIP-Seq(GSE25021)/Homer	CARRGKBCAAAGTYCA	1e-519	-1196	0	3222	0.1015	1208.7	0.0385
RARa(NR)/K562-RARa-ChIP-Seq(Encode)/Homer	TTGAMCTTTG	1e-482	-1111	0	12398	0.3907	8443.6	0.269
PPARE(NR),DR1/3T3L1-Pparg-ChIP-Seq(GSE13511)/Homer	TGACCTTTGCCCCA	1e-453	-1045	0	5462	0.1721	2841.9	0.0905
RXR(NR),DR1/3T3L1-RXR-ChIP-Seq(GSE13511)/Homer	TAGGGCAAAGGTCA	1e-415	-957.1	0	6294	0.1983	3564.1	0.1136
Esrrb(NR)/mES-Esrrb-ChIP-Seq(GSE11431)/Homer	KTGACCTTGA	1e-411	-947.4	0	3997	0.126	1886.7	0.0601
Erra(NR)/HepG2-Erra-ChIP-Seq(GSE31477)/Homer	CAAAGGTCAG	1e-399	-919.2	0	11113	0.3502	7623.3	0.2429
Nur77(NR)/K562-NR4A1-ChIP-Seq(GSE31363)/Homer	TGACCTTTNCNT	1e-329	-759	0	1234	0.0389	320.7	0.0102
THRb(NR)/Liver-NR1A2-ChIP-Seq(GSE52613)/Homer	TRAGGTCA	1e-299	-689.6	0	16404	0.5169	12985.9	0.4137
NLP7(RWPRK)/col-NLP7-DAP-Seq(GSE60143)/Homer	TGRCCYTTCR	1e-196	-453.2	0	8009	0.2524	5787.4	0.1844
Fli1(ETS)/CD8-FLI-ChIP-Seq(GSE20898)/Homer	NRYTTCCGGH	1e-165	-380.7	0	6579	0.2073	4700.3	0.1498
WRKY18(WRKY)/col-WRKY18-DAP-Seq(GSE60143)/Homer	NNNTTGACYWNNNNN	1e-147	-339.3	0	4867	0.1534	3327.1	0.106
GABPA(ETS)/Jurkat-GABPa-ChIP-Seq(GSE17954)/Homer	RACCGGAAGT	1e-144	-333.2	0	5247	0.1653	3660	0.1166
ERG(ETS)/VCaP-ERG-ChIP-Seq(GSE14097)/Homer	ACAGGAAGTG	1e-142	-327.5	0	7294	0.2299	5451.7	0.1737
WRKY50(WRKY)/col-WRKY50-DAP-Seq(GSE60143)/Homer	NNTTGACTWNNGNNN	1e-138	-320	0	2953	0.0931	1803.7	0.0575
ETV4(ETS)/HepG2-ETV4-ChIP-Seq(ENCODE)/Homer	ACCGGAAGTG	1e-137	-317.4	0	6876	0.2167	5107.1	0.1627
Etv2(ETS)/ES-ER71-ChIP-Seq(GSE59402)/Homer(0.967)	NNAYTTCCTGHN	1e-136	-313.5	0	4590	0.1446	3146.8	0.1003
WRKY6(WRKY)/colamp-WRKY6-DAP-Seq(GSE60143)/Homer	NCGTTGACTWWD	1e-132	-305	0	2472	0.0779	1452.4	0.0463
WRKY55(WRKY)/col-WRKY55-DAP-Seq(GSE60143)/Homer	NCGTTGACTT	1e-128	-295.5	0	3315	0.1045	2130.8	0.0679
Elk4(ETS)/Hela-Elk4-ChIP-Seq(GSE31477)/Homer	NRYTTCCGGY	1e-127	-294.2	0	4423	0.1394	3045.4	0.097
ETS1(ETS)/Jurkat-ETS1-ChIP-Seq(GSE17954)/Homer	ACAGGAAGTG	1e-125	-289.3	0	5352	0.1687	3846.3	0.1225
ETV1(ETS)/GIST48-ETV1-ChIP-Seq(GSE22441)/Homer	AACCGGAAGT	1e-119	-274.8	0	7095	0.2236	5413.9	0.1725
Elk1(ETS)/Hela-Elk1-ChIP-Seq(GSE31477)/Homer	HACTTCCGGY	1e-118	-272.8	0	4435	0.1398	3100.4	0.0988
WRKY31(WRKY)/colamp-WRKY31-DAP-Seq(GSE60143)/Homer	NCGTTGACTWWK	1e-116	-267.3	0	2013	0.0634	1154	0.0368
WRKY28(WRKY)/col-WRKY28-DAP-Seq(GSE60143)/Homer	BGTTGACTWH	1e-114	-263.9	0	3402	0.1072	2258	0.0719
WRKY25(WRKY)/colamp-WRKY25-DAP-Seq(GSE60143)/Homer	NNNNHRGTCAAMNNN	1e-114	-262.8	0	3007	0.0948	1938.4	0.0618
ELF1(ETS)/Jurkat-ELF1-ChIP-Seq(SRA014231)/Homer	AVCCGGAAGT	1e-109	-253.2	0	4000	0.1261	2775.5	0.0884
WRKY71(WRKY)/col-WRKY71-DAP-Seq(GSE60143)/Homer	CKTTGACYWW	1e-109	-252.4	0	2162	0.0681	1288.4	0.041
WRKY27(WRKY)/colamp-WRKY27-DAP-Seq(GSE60143)/Homer	NHGTTGACYTWD	1e-109	-252	0	2397	0.0755	1472	0.0469
WRKY20(WRKY)/col-WRKY20-DAP-Seq(GSE60143)/Homer	CKTTGACYWD	1e-108	-248.8	0	2141	0.0675	1277.9	0.0407
WRKY29(WRKY)/colamp-WRKY29-DAP-Seq(GSE60143)/Homer	MGTTGACTTT	1e-107	-246.6	0	2727	0.0859	1741	0.0555
WRKY24(WRKY)/colamp-WRKY24-DAP-Seq(GSE60143)/Homer	CGTTGACTWW	1e-105	-241.8	0	2387	0.0752	1479.6	0.0471
WRKY15(WRKY)/col-WRKY15-DAP-Seq(GSE60143)/Homer	VGTTGACTWW	1e-101	-234.2	0	2653	0.0836	1703.4	0.0543
ETS(ETS)/Promoter/Homer	AACCGGAAGT	1e-99	-228.6	0	2636	0.0831	1700	0.0542
EWS:FLI1-fusion(ETS)/SK_N_MC-EWS:FLI1-ChIP-Seq(SRA014231)/Homer	VACAGGAAAT	1e-94	-217.3	0	3126	0.0985	2120.2	0.0676
WRKY43(WRKY)/colamp-WRKY43-DAP-Seq(GSE60143)/Homer	NCGTTGACTTTT	1e-93	-216.3	0	1028	0.0324	499.5	0.0159
WRKY75(WRKY)/col-WRKY75-DAP-Seq(GSE60143)/Homer	CGTTGACTWW	1e-90	-207.8	0	2502	0.0788	1628.6	0.0519
WRKY3(WRKY)/col-WRKY3-DAP-Seq(GSE60143)/Homer	NCKTTGACYDDN	1e-87	-202.6	0	1703	0.0537	1007.1	0.0321
WRKY33(WRKY)/col-WRKY33-DAP-Seq(GSE60143)/Homer	CGTTGACYAW	1e-87	-201.8	0	2221	0.07	1413.2	0.045
WRKY26(WRKY)/colamp-WRKY26-DAP-Seq(GSE60143)/Homer	CGTTGACTWDKN	1e-86	-199.9	0	1528	0.0482	879	0.028
Foxa3(Forkhead)/Liver-Foxa3-ChIP-Seq(GSE77670)/Homer	BSNTGTTTACWYWGN	1e-83	-192.2	0	910	0.0287	441.9	0.0141
Foxa2(Forkhead)/Liver-Foxa2-ChIP-Seq(GSE25694)/Homer	CYTGTTTACWYW	1e-83	-191.9	0	2108	0.0664	1340.1	0.0427
RAR:RXR(NR),DR5/ES-RAR-ChIP-Seq(GSE56893)/Homer	AGGTCAAGGTCA	1e-82	-189	0	1028	0.0324	526.2	0.0168
Nr5a2(NR)/Pancreas-LRH1-ChIP-Seq(GSE34295)/Homer	BTCAAGGTCA	1e-81	-188.5	0	3338	0.1052	2359.6	0.0752
EWS:ERG-fusion(ETS)/CADO_ES1-EWS:ERG-ChIP-Seq(SRA014231)/Homer	ATTTCCTGTN	1e-81	-188.4	0	2529	0.0797	1686	0.0537
Elf4(ETS)/BMDM-Elf4-ChIP-Seq(GSE88699)/Homer	ACTTCCKGKT	1e-80	-185.6	0	5035	0.1587	3837	0.1222
EHF(ETS)/LoVo-EHF-ChIP-Seq(GSE49402)/Homer	AVCAGGAAGT	1e-79	-183	0	5249	0.1654	4033.9	0.1285
dHNF4(NR)/Fly-HNF4-ChIP-Seq(GSE73675)/Homer	GGTCCAAAGTCCAMT	1e-79	-183	0	316	0.01	86.8	0.0028
NF1(CTF)/LNCAP-NF1-ChIP-Seq(Unpublished)/Homer	CYTGGCABNSTGCCAR	1e-79	-182.4	0	2045	0.0644	1306.3	0.0416
WRKY14(WRKY)/colamp-WRKY14-DAP-Seq(GSE60143)/Homer	NCGTTGACTTTN	1e-78	-179.7	0	1383	0.0436	796.7	0.0254
WRKY40(WRKY)/colamp-WRKY40-DAP-Seq(GSE60143)/Homer	AHWAGTCAAC	1e-75	-173.8	0	1556	0.049	937	0.0299
FOXA1(Forkhead)/MCF7-FOXA1-ChIP-Seq(GSE26831)/Homer	WAAGTAAACA	1e-74	-172	0	2228	0.0702	1472.9	0.0469
FOXM1(Forkhead)/MCF7-FOXM1-ChIP-Seq(GSE72977)/Homer	TRTTTACTTW	1e-74	-171.3	0	2433	0.0767	1641.8	0.0523
Ets1-distal(ETS)/CD4+-PolII-ChIP-Seq(Barski_et_al.)/Homer	MACAGGAAGT	1e-73	-169.8	0	1385	0.0436	811.3	0.0258
FOXA1(Forkhead)/LNCAP-FOXA1-ChIP-Seq(GSE27824)/Homer	WAAGTAAACA	1e-72	-166.4	0	2732	0.0861	1899.9	0.0605
FOXP1(Forkhead)/H9-FOXP1-ChIP-Seq(GSE31006)/Homer	NYYTGTTTACHN	1e-71	-163.7	0	1150	0.0362	644	0.0205
Foxf1(Forkhead)/Lung-Foxf1-ChIP-Seq(GSE77951)/Homer	WWATRTAAACAN	1e-65	-149.7	0	1901	0.0599	1249.4	0.0398
Foxo3(Forkhead)/U2OS-Foxo3-ChIP-Seq(E-MTAB-2701)/Homer	DGTAAACA	1e-61	-140.5	0	1726	0.0544	1125.8	0.0359
Fox:Ebox(Forkhead,bHLH)/Panc1-Foxa2-ChIP-Seq(GSE47459)/Homer	NNNVCTGWGYAAACASN	1e-60	-140.1	0	2758	0.0869	1982.5	0.0632
Nr5a2(NR)/mES-Nr5a2-ChIP-Seq(GSE19019)/Homer	BTCAAGGTCA	1e-58	-134.3	0	2529	0.0797	1802.7	0.0574
CEBP(bZIP)/ThioMac-CEBPb-ChIP-Seq(GSE21512)/Homer	ATTGCGCAAC	1e-58	-134.1	0	1618	0.051	1050.7	0.0335
ELF3(ETS)/PDAC-ELF3-ChIP-Seq(GSE64557)/Homer	ANCAGGAAGT	1e-56	-130.2	0	2827	0.0891	2066.5	0.0658
WRKY65(WRKY)/colamp-WRKY65-DAP-Seq(GSE60143)/Homer	AWWWAGTCAACG	1e-55	-126.8	0	1197	0.0377	730.5	0.0233
FOXK1(Forkhead)/HEK293-FOXK1-ChIP-Seq(GSE51673)/Homer	NVWTGTTTAC	1e-53	-123.6	0	2352	0.0741	1679	0.0535
SF1(NR)/H295R-Nr5a1-ChIP-Seq(GSE44220)/Homer	CAAGGHCANV	1e-52	-121.3	0	2153	0.0678	1516.3	0.0483
FOXK2(Forkhead)/U2OS-FOXK2-ChIP-Seq(E-MTAB-2204)/Homer	SCHTGTTTACAT	1e-52	-121	0	1642	0.0517	1094.6	0.0349
HNF6(Homeobox)/Liver-Hnf6-ChIP-Seq(ERP000394)/Homer	NTATYGATCH	1e-51	-119.5	0	1241	0.0391	776.9	0.0248
FoxL2(Forkhead)/Ovary-FoxL2-ChIP-Seq(GSE60858)/Homer	WWTRTAAACAVG	1e-51	-119	0	1724	0.0543	1165.2	0.0371
Cux2(Homeobox)/Liver-Cux2-ChIP-Seq(GSE35985)/Homer	HNRAATCAAT	1e-51	-118.5	0	963	0.0303	563.7	0.018
FXR(NR),IR1/Liver-FXR-ChIP-Seq(Chong_et_al.)/Homer	AGGTCANTGACCTB	1e-49	-113.3	0	1863	0.0587	1292.9	0.0412
Gata6(Zf)/HUG1N-GATA6-ChIP-Seq(GSE51936)/Homer	YCTTATCTBN	1e-48	-110.6	0	2010	0.0633	1421.5	0.0453
Hnf1(Homeobox)/Liver-Foxa2-Chip-Seq(GSE25694)/Homer	GGTTAAWCATTAA	1e-47	-108.7	0	301	0.0095	113.2	0.0036
Gata2(Zf)/K562-GATA2-ChIP-Seq(GSE18829)/Homer	BBCTTATCTS	1e-46	-108.2	0	1565	0.0493	1057.7	0.0337
Gata4(Zf)/Heart-Gata4-ChIP-Seq(GSE35151)/Homer	NBWGATAAGR	1e-46	-107.5	0	2261	0.0713	1641.3	0.0523
THRb(NR)/HepG2-THRb.Flag-ChIP-Seq(Encode)/Homer	GGTCACCTGAGGTCA	1e-46	-106.7	0	2865	0.0903	2164.7	0.069
Foxo1(Forkhead)/RAW-Foxo1-ChIP-Seq(Fan_et_al.)/Homer	CTGTTTAC	1e-45	-105.8	0	5705	0.1798	4719.9	0.1504
ELF5(ETS)/T47D-ELF5-ChIP-Seq(GSE30407)/Homer	ACVAGGAAGT	1e-45	-104.2	0	3020	0.0952	2307.3	0.0735
Gata1(Zf)/K562-GATA1-ChIP-Seq(GSE18829)/Homer	SAGATAAGRV	1e-44	-103.3	0	1450	0.0457	973.2	0.031
GATA3(Zf)/iTreg-Gata3-ChIP-Seq(GSE20898)/Homer	AGATAASR	1e-43	-101.1	0	3193	0.1006	2469.9	0.0787
ZNF711(Zf)/SHSY5Y-ZNF711-ChIP-Seq(GSE20673)/Homer	AGGCCTAG	1e-43	-100.3	0	9701	0.3057	8492.8	0.2706
VDR(NR),DR3/GM10855-VDR+vitD-ChIP-Seq(GSE22484)/Homer	ARAGGTCANWGAGTTCANNN	1e-43	-99.33	0	952	0.03	583.2	0.0186
WRKY22(WRKY)/colamp-WRKY22-DAP-Seq(GSE60143)/Homer	WWAAAGTCAACK	1e-41	-94.97	0	1406	0.0443	954.7	0.0304
HNF1b(Homeobox)/PDAC-HNF1B-ChIP-Seq(GSE64557)/Homer	GTTAATNATTAA	1e-40	-92.41	0	305	0.0096	126.7	0.004
ZFX(Zf)/mES-Zfx-ChIP-Seq(GSE11431)/Homer	AGGCCTRG	1e-39	-92.04	0	6267	0.1975	5301.4	0.1689
HLF(bZIP)/HSC-HLF.Flag-ChIP-Seq(GSE69817)/Homer	RTTATGYAAB	1e-39	-91.19	0	1667	0.0525	1179	0.0376
PHA-4(Forkhead)/cElegans-Embryos-PHA4-ChIP-Seq(modEncode)/Homer	KTGTTTGC	1e-39	-90.87	0	7713	0.2431	6660.9	0.2122
NFIL3(bZIP)/HepG2-NFIL3-ChIP-Seq(Encode)/Homer	VTTACGTAAYNNNNN	1e-39	-90.27	0	1446	0.0456	997.3	0.0318
THRa(NR)/C17.2-THRa-ChIP-Seq(GSE38347)/Homer	GGTCANYTGAGGWCA	1e-35	-82.89	0	1905	0.06	1402.7	0.0447
SPDEF(ETS)/VCaP-SPDEF-ChIP-Seq(SRA014231)/Homer	ASWTCCTGBT	1e-35	-82.77	0	4285	0.135	3518.3	0.1121
SUT1?/SacCer-Promoters/Homer	CCCCGCGC	1e-34	-78.97	0	26300	0.8288	25164.6	0.8018
RAR:RXR(NR),DR5/ES-RAR-ChIP-Seq(GSE56893)/Homer	RGGTCADNNAGAGGTCAV	1e-33	-77.53	0	194	0.0061	69.9	0.0022
ERE(NR),IR3/MCF7-ERa-ChIP-Seq(Unpublished)/Homer	VAGGTCACNSTGACC	1e-33	-76.9	0	1106	0.0349	746.8	0.0238
Bcl11a(Zf)/HSPC-BCL11A-ChIP-Seq(GSE104676)/Homer	TYTGACCASWRG	1e-30	-69.39	0	2522	0.0795	1983.1	0.0632
Atf1(bZIP)/K562-ATF1-ChIP-Seq(GSE31477)/Homer	GATGACGTCA	1e-29	-67.24	0	2116	0.0667	1632.6	0.052
SeqBias: CG bias	SSSSSSSSSS	1e-28	-65.94	0	29941	0.9435	29121.9	0.9278
RARg(NR)/ES-RARg-ChIP-Seq(GSE30538)/Homer	AGGTCAAGGTCA	1e-28	-64.54	0	469	0.0148	266.2	0.0085
NF1:FOXA1(CTF,Forkhead)/LNCAP-FOXA1-ChIP-Seq(GSE27824)/Homer	WNTGTTTRYTTTGGCA	1e-27	-63.58	0	185	0.0058	72.1	0.0023
WRKY11(WRKY)/col-WRKY11-DAP-Seq(GSE60143)/Homer	SCGTTGACTTTN	1e-27	-63.17	0	365	0.0115	192.9	0.0061
WRKY45(WRKY)/col-WRKY45-DAP-Seq(GSE60143)/Homer	HNNNKTTGACTWWNH	1e-26	-60.39	0	814	0.0257	542.3	0.0173
Tlx?(NR)/NPC-H3K4me1-ChIP-Seq(GSE16256)/Homer	CTGGCAGSCTGCCA	1e-25	-59.42	0	1862	0.0587	1435.8	0.0457
RORa(NR)/Liver-Rora-ChIP-Seq(GSE101115)/Homer	AAWCTAGGTCARDNN	1e-25	-57.72	0	454	0.0143	264.7	0.0084
SeqBias: polyA-repeat	AAAAAAAAAA	1e-24	-57.35	0	30276	0.9541	29528.9	0.9408
PU.1(ETS)/ThioMac-PU.1-ChIP-Seq(GSE21512)/Homer	AGAGGAAGTG	1e-24	-56.16	0	1980	0.0624	1550.4	0.0494
FEA4(bZIP)/Corn-FEA4-ChIP-Seq(GSE61954)/Homer	TGACGTCACS	1e-23	-54.02	0	3702	0.1167	3117.2	0.0993
SpiB(ETS)/OCILY3-SPIB-ChIP-Seq(GSE56857)/Homer	AAAGRGGAAGTG	1e-22	-52.81	0	858	0.027	594.4	0.0189
CEBP:AP1(bZIP)/ThioMac-CEBPb-ChIP-Seq(GSE21512)/Homer	DRTGTTGCAA	1e-22	-52.3	0	1681	0.053	1300.2	0.0414
WRKY47(WRKY)/colamp-WRKY47-DAP-Seq(GSE60143)/Homer	WAAGTCAACGBT	1e-22	-50.9	0	677	0.0213	450.5	0.0144
WRKY42(WRKY)/colamp-WRKY42-DAP-Seq(GSE60143)/Homer	NAAAGTCAACGN	1e-21	-50.29	0	935	0.0295	664.4	0.0212
NF1-halfsite(CTF)/LNCaP-NF1-ChIP-Seq(Unpublished)/Homer	YTGCCAAG	1e-21	-49.97	0	6585	0.2075	5840.7	0.1861
PQM-1(?)/cElegans-L3-ChIP-Seq(modEncode)/Homer	ACTGATAAGA	1e-21	-48.85	0	710	0.0224	481.1	0.0153
Reverb(NR),DR2/RAW-Reverba.biotin-ChIP-Seq(GSE45914)/Homer	GTRGGTCASTGGGTCA	1e-20	-47.2	0	637	0.0201	425.7	0.0136
CUX1(Homeobox)/K562-CUX1-ChIP-Seq(GSE92882)/Homer	TATCGATNAN	1e-19	-45.23	0	1103	0.0348	820.5	0.0261
At1g49010(MYBrelated)/col-At1g49010-DAP-Seq(GSE60143)/Homer	RGATAASNTT	1e-19	-43.91	0	3745	0.118	3211.2	0.1023
Stat3(Stat)/mES-Stat3-ChIP-Seq(GSE11431)/Homer	CTTCCGGGAA	1e-19	-43.8	0	1990	0.0627	1606.4	0.0512
Atf4(bZIP)/MEF-Atf4-ChIP-Seq(GSE35681)/Homer	MTGATGCAAT	1e-18	-43.47	0	587	0.0185	392.7	0.0125
Atf7(bZIP)/3T3L1-Atf7-ChIP-Seq(GSE56872)/Homer	NGRTGACGTCAY	1e-18	-43.27	0	1483	0.0467	1157.8	0.0369
MITF(bHLH)/MastCells-MITF-ChIP-Seq(GSE48085)/Homer	RTCATGTGAC	1e-18	-43.09	0	3029	0.0955	2554.5	0.0814
CTCF(Zf)/CD4+-CTCF-ChIP-Seq(Barski_et_al.)/Homer	AYAGTGCCMYCTRGTGGCCA	1e-18	-41.89	0	712	0.0224	498.3	0.0159
RKD2(RWPRK)/colamp-RKD2-DAP-Seq(GSE60143)/Homer	GACKTTTCRDCTTCC	1e-18	-41.83	0	2124	0.0669	1735.8	0.0553
Sp2(Zf)/HEK293-Sp2.eGFP-ChIP-Seq(Encode)/Homer	YGGCCCCGCCCC	1e-17	-41.41	0	9678	0.305	8872.8	0.2827
ETS:RUNX(ETS,Runt)/Jurkat-RUNX1-ChIP-Seq(GSE17954)/Homer	RCAGGATGTGGT	1e-17	-41.39	0	500	0.0158	326.6	0.0104
At5g05790(MYBrelated)/col-At5g05790-DAP-Seq(GSE60143)/Homer	AYCTTATC	1e-17	-40.65	0	1796	0.0566	1445.1	0.046
Zac1(Zf)/Neuro2A-Plagl1-ChIP-Seq(GSE75942)/Homer	HAWGRGGCCM	1e-17	-40.32	0	11390	0.3589	10543.6	0.3359
LXRE(NR),DR4/RAW-LXRb.biotin-ChIP-Seq(GSE21512)/Homer	RGGTTACTANAGGTCA	1e-17	-39.85	0	226	0.0071	119.7	0.0038
At3g11280(MYBrelated)/col-At3g11280-DAP-Seq(GSE60143)/Homer	GATAAGRT	1e-17	-39.83	0	1723	0.0543	1383.7	0.0441
At5g58900(MYBrelated)/colamp-At5g58900-DAP-Seq(GSE60143)/Homer	WWWTYTTATCTWWWW	1e-16	-39.13	0	2189	0.069	1806.5	0.0576
MYB81(MYB)/col-MYB81-DAP-Seq(GSE60143)/Homer	NWAACSGWTWNN	1e-16	-37.65	0	3222	0.1015	2762.9	0.088
RORg(NR)/Liver-Rorc-ChIP-Seq(GSE101115)/Homer	WAABTAGGTCAV	1e-15	-35.82	0	295	0.0093	175.8	0.0056
AT2G15740(C2H2)/col-AT2G15740-DAP-Seq(GSE60143)/Homer	DHNDWATCGATD	1e-15	-35.39	0	1487	0.0469	1190.3	0.0379
Atf2(bZIP)/3T3L1-Atf2-ChIP-Seq(GSE56872)/Homer	NRRTGACGTCAT	1e-15	-34.82	0	1083	0.0341	835.9	0.0266
Fra2(bZIP)/Striatum-Fra2-ChIP-Seq(GSE43429)/Homer	GGATGACTCATC	1e-14	-34.21	0	1132	0.0357	880.1	0.028
ATAF1(NAC)/col-ATAF1-DAP-Seq(GSE60143)/Homer	YACGTMAY	1e-14	-34.13	0	8494	0.2677	7795.4	0.2484
IRF8(IRF)/BMDM-IRF8-ChIP-Seq(GSE77884)/Homer	GRAASTGAAAST	1e-14	-33.45	0	962	0.0303	734.2	0.0234
LBD18(LOBAS2)/colamp-LBD18-DAP-Seq(GSE60143)/Homer	CKGAWWTTCHGS	1e-14	-33.35	0	6696	0.211	6074.9	0.1935
GT2(Trihelix)/colamp-GT2-DAP-Seq(GSE60143)/Homer	AMGGTAAAWWWN	1e-14	-33.26	0	1493	0.047	1204.3	0.0384
RORgt(NR)/EL4-RORgt.Flag-ChIP-Seq(GSE56019)/Homer	AAYTAGGTCA	1e-14	-33.22	0	417	0.0131	275	0.0088
RORgt(NR)/EL4-RORgt.Flag-ChIP-Seq(GSE56019)/Homer	AAYTAGGTCA	1e-14	-33.22	0	417	0.0131	275	0.0088
ATHB13(Homeobox)/col-ATHB13-DAP-Seq(GSE60143)/Homer	CAATAATT	1e-14	-32.47	0	1176	0.0371	925.2	0.0295
Chop(bZIP)/MEF-Chop-ChIP-Seq(GSE35681)/Homer	ATTGCATCAT	1e-13	-32.12	0	423	0.0133	282	0.009
AZF1(C2H2)/colamp-AZF1-DAP-Seq(GSE60143)/Homer	DKSWCACT	1e-13	-31.96	0	16938	0.5338	16082.1	0.5124
SeqBias: GCW-triplet	GCWGCWGCWGCW	1e-13	-31.81	0	31732	1	31351.7	0.9989
At5g08520(MYBrelated)/colamp-At5g08520-DAP-Seq(GSE60143)/Homer	ADBSTTATCY	1e-13	-30.87	0	2273	0.0716	1924.4	0.0613
TEAD4(TEA)/Tropoblast-Tead4-ChIP-Seq(GSE37350)/Homer	CCWGGAATGY	1e-13	-30.85	0	2287	0.0721	1937.6	0.0617
Bach2(bZIP)/OCILy7-Bach2-ChIP-Seq(GSE44420)/Homer	TGCTGAGTCA	1e-13	-30.53	0	575	0.0181	411.7	0.0131
PU.1:IRF8(ETS:IRF)/pDC-Irf8-ChIP-Seq(GSE66899)/Homer	GGAAGTGAAAST	1e-12	-29.39	0	543	0.0171	387.3	0.0123
TCFL2(HMG)/K562-TCF7L2-ChIP-Seq(GSE29196)/Homer	ACWTCAAAGG	1e-12	-28.96	0	258	0.0081	157.9	0.005
TBP3(MYBrelated)/col-TBP3-DAP-Seq(GSE60143)/Homer	VYTAGGGCAN	1e-12	-28.88	0	2469	0.0778	2116.1	0.0674
E2F4(E2F)/K562-E2F4-ChIP-Seq(GSE31477)/Homer	GGCGGGAAAH	1e-12	-28.83	0	3114	0.0981	2716.6	0.0866
LBD19(LOBAS2)/colamp-LBD19-DAP-Seq(GSE60143)/Homer	CCKGAAWTTCMGGAW	1e-12	-27.73	0	5354	0.1687	4841.7	0.1543
MYB70(MYB)/col-MYB70-DAP-Seq(GSE60143)/Homer	WTAACNGTTA	1e-11	-27.56	0	2939	0.0926	2561.7	0.0816
ATHB5(HB)/colamp-ATHB5-DAP-Seq(GSE60143)/Homer	AATGATTG	1e-11	-27.34	0	1110	0.035	886.9	0.0283
bZIP50(bZIP)/colamp-bZIP50-DAP-Seq(GSE60143)/Homer	GATGACGTCA	1e-11	-27.15	0	2845	0.0897	2476.7	0.0789
MYB119(MYB)/colamp-MYB119-DAP-Seq(GSE60143)/Homer	YRACCGTTACDD	1e-11	-27.14	0	706	0.0222	532.7	0.017
WRKY8(WRKY)/colamp-WRKY8-DAP-Seq(GSE60143)/Homer	CGTTGACTTT	1e-11	-26.97	0	241	0.0076	147.9	0.0047
JunB(bZIP)/DendriticCells-Junb-ChIP-Seq(GSE36099)/Homer	RATGASTCAT	1e-11	-26.79	0	1244	0.0392	1008.1	0.0321
NF-E2(bZIP)/K562-NFE2-ChIP-Seq(GSE31477)/Homer	GATGACTCAGCA	1e-11	-26.7	0	185	0.0058	105.7	0.0034
Atf3(bZIP)/GBM-ATF3-ChIP-Seq(GSE33912)/Homer	DATGASTCATHN	1e-11	-26.5	0	1460	0.046	1204.7	0.0384
STAT1(Stat)/HelaS3-STAT1-ChIP-Seq(GSE12782)/Homer	NATTTCCNGGAAAT	1e-11	-26.28	0	795	0.0251	612.1	0.0195
WRKY21(WRKY)/colamp-WRKY21-DAP-Seq(GSE60143)/Homer	DCGTTGACTTTT	1e-11	-25.89	0	218	0.0069	131.7	0.0042
WRKY30(WRKY)/colamp-WRKY30-DAP-Seq(GSE60143)/Homer	CGTTGACTTN	1e-11	-25.82	0	737	0.0232	563.1	0.0179
LMI1(HB)/colamp-LMI1-DAP-Seq(GSE60143)/Homer	AATTATTG	1e-11	-25.45	0	708	0.0223	539.9	0.0172
AP-2alpha(AP2)/Hela-AP2alpha-ChIP-Seq(GSE31477)/Homer	ATGCCCTGAGGC	1e-11	-25.37	0	4296	0.1354	3855.2	0.1228
ZNF652/HepG2-ZNF652.Flag-ChIP-Seq(Encode)/Homer	TTAACCCTTTVNKKN	1e-10	-24.88	0	562	0.0177	415.3	0.0132
Ronin(THAP)/ES-Thap11-ChIP-Seq(GSE51522)/Homer	RACTACAACTCCCAGVAKGC	1e-10	-23.34	0	290	0.0091	192.3	0.0061
AP-1(bZIP)/ThioMac-PU.1-ChIP-Seq(GSE21512)/Homer	VTGACTCATC	1e-09	-22.94	0	1676	0.0528	1419.7	0.0452
Stat3+il21(Stat)/CD4-Stat3-ChIP-Seq(GSE19198)/Homer	SVYTTCCNGGAARB	1e-09	-22.92	0	2271	0.0716	1969.6	0.0628
PU.1-IRF(ETS:IRF)/Bcell-PU.1-ChIP-Seq(GSE21512)/Homer	MGGAAGTGAAAC	1e-09	-22.66	0	3981	0.1255	3579.6	0.114
GFX(?)/Promoter/Homer	ATTCTCGCGAGA	1e-09	-22.49	0	156	0.0049	89.2	0.0028
BMYB(HTH)/Hela-BMYB-ChIP-Seq(GSE27030)/Homer	NHAACBGYYV	1e-09	-22.37	0	4520	0.1424	4094.2	0.1304
Fosl2(bZIP)/3T3L1-Fosl2-ChIP-Seq(GSE56872)/Homer	NATGASTCABNN	1e-09	-22.33	0	846	0.0267	671	0.0214
ASL18(LOBAS2)/colamp-ASL18-DAP-Seq(GSE60143)/Homer	CCGGAAAWTCMGGAR	1e-09	-22.28	0	6423	0.2024	5918.2	0.1886
MYB98(MYB)/col-MYB98-DAP-Seq(GSE60143)/Homer	NWDCCGTTAC	1e-09	-22.07	0	694	0.0219	538.9	0.0172
Jun-AP1(bZIP)/K562-cJun-ChIP-Seq(GSE31477)/Homer	GATGASTCATCN	1e-09	-21.99	0	610	0.0192	465.2	0.0148
ANAC046(NAC)/colamp-ANAC046-DAP-Seq(GSE60143)/Homer	ACACGYWAYC	1e-09	-21.28	0	4676	0.1474	4253.6	0.1355
Rbpj1(?)/Panc1-Rbpj1-ChIP-Seq(GSE47459)/Homer	HTTTCCCASG	1e-09	-21.16	0	4636	0.1461	4216.8	0.1343
c-Jun-CRE(bZIP)/K562-cJun-ChIP-Seq(GSE31477)/Homer	ATGACGTCATCY	1e-09	-20.79	0	874	0.0275	703	0.0224
AT5G05550(Trihelix)/col-AT5G05550-DAP-Seq(GSE60143)/Homer	HDNHDTCKCCGGMGA	1e-08	-20.61	0	6457	0.2035	5969.2	0.1902
Fra1(bZIP)/BT549-Fra1-ChIP-Seq(GSE46166)/Homer	NNATGASTCATH	1e-08	-20.53	0	1198	0.0378	995	0.0317
AARE(HLH)/mES-cMyc-ChIP-Seq/Homer	GATTGCATCA	1e-08	-20.52	0	198	0.0062	124.6	0.004
MYB3R4(MYB)/col-MYB3R4-DAP-Seq(GSE60143)/Homer	AWWTAACCGTTR	1e-08	-20.46	0	365	0.0115	260.5	0.0083
TEAD(TEA)/Fibroblast-PU.1-ChIP-Seq(Unpublished)/Homer	YCWGGAATGY	1e-08	-20.14	0	1379	0.0435	1162.6	0.037
AT5G47660(Trihelix)/colamp-AT5G47660-DAP-Seq(GSE60143)/Homer	AWTTTTACCG	1e-08	-20.04	0	2291	0.0722	2007	0.0639
MYB3R1(MYB)/col-MYB3R1-DAP-Seq(GSE60143)/Homer	WWDTDACCGTTR	1e-08	-19.85	0	556	0.0175	425	0.0135
Usf2(bHLH)/C2C12-Usf2-ChIP-Seq(GSE36030)/Homer	GTCACGTGGT	1e-08	-19.58	0	1086	0.0342	898.9	0.0286
Unknown3/Arabidopsis-Promoters/Homer	AYTAAACCGG	1e-08	-19.48	0	597	0.0188	462.2	0.0147
GTL1(Trihelix)/colamp-GTL1-DAP-Seq(GSE60143)/Homer	WWTTTACCKY	1e-08	-19.41	0	1707	0.0538	1468	0.0468
TGA6(bZIP)/colamp-TGA6-DAP-Seq(GSE60143)/Homer	TGACGTCABC	1e-08	-19.18	0	1753	0.0552	1512.1	0.0482
Tbet(T-box)/CD8-Tbet-ChIP-Seq(GSE33802)/Homer	AGGTGTGAAM	1e-08	-19.18	0	2371	0.0747	2088.5	0.0665
LBD23(LOBAS2)/colamp-LBD23-DAP-Seq(GSE60143)/Homer	GCGNAWWWTNCGCYW	1e-08	-19.09	0	4067	0.1282	3693.3	0.1177
STAT4(Stat)/CD4-Stat4-ChIP-Seq(GSE22104)/Homer	NYTTCCWGGAAR	1e-08	-18.81	0	2414	0.0761	2131.1	0.0679
Six1(Homeobox)/Myoblast-Six1-ChIP-Chip(GSE20150)/Homer	GKVTCADRTTWC	1e-08	-18.67	0	571	0.018	442.3	0.0141
NAP(NAC)/col-NAP-DAP-Seq(GSE60143)/Homer	ARGTTACGTRTN	1e-08	-18.65	0	2289	0.0721	2015.9	0.0642
Mef2c(MADS)/GM12878-Mef2c-ChIP-Seq(GSE32465)/Homer	DCYAAAAATAGM	1e-08	-18.65	0	604	0.019	471.3	0.015
AP-2gamma(AP2)/MCF7-TFAP2C-ChIP-Seq(GSE21234)/Homer	SCCTSAGGSCAW	1e-08	-18.58	0	5559	0.1752	5127.5	0.1634
AT3G42860(zfGRF)/col-AT3G42860-DAP-Seq(GSE60143)/Homer	CGTTGACTTN	1e-07	-18.37	0	629	0.0198	494.6	0.0158
ELT-3(Gata)/cElegans-L1-ELT3-ChIP-Seq(modEncode)/Homer	AWTGATAAGA	1e-07	-18.02	0	666	0.021	528	0.0168
Sp1(Zf)/Promoter/Homer	GGCCCCGCCCCC	1e-07	-18.02	0	2952	0.093	2644.6	0.0843
MYB73(MYB)/col-MYB73-DAP-Seq(GSE60143)/Homer	NNNNHAACNGHHDHN	1e-07	-17.94	0	3707	0.1168	3361.9	0.1071
GFY(?)/Promoter/Homer	ACTACAATTCCC	1e-07	-17.61	0	361	0.0114	264.4	0.0084
ANAC038(NAC)/col-ANAC038-DAP-Seq(GSE60143)/Homer	ACACGTWAYC	1e-07	-17.58	0	5279	0.1664	4869.8	0.1552
TEAD2(TEA)/Py2T-Tead2-ChIP-Seq(GSE55709)/Homer	CCWGGAATGY	1e-07	-17.56	0	1284	0.0405	1089.8	0.0347
Nanog(Homeobox)/mES-Nanog-ChIP-Seq(GSE11724)/Homer	RGCCATTAAC	1e-07	-17.16	0	10829	0.3413	10263.5	0.327
Nrf2(bZIP)/Lymphoblast-Nrf2-ChIP-Seq(GSE37589)/Homer	HTGCTGAGTCAT	1e-07	-16.81	0	153	0.0048	95.1	0.003
At5g47390(MYBrelated)/col-At5g47390-DAP-Seq(GSE60143)/Homer	CTTATCCA	1e-07	-16.76	0	2428	0.0765	2160.7	0.0688
Hoxa10(Homeobox)/ChickenMSG-Hoxa10.Flag-ChIP-Seq(GSE86088)/Homer	GGYAATGAAA	1e-07	-16.62	0	1027	0.0324	860	0.0274
PAX5(Paired,Homeobox)/GM12878-PAX5-ChIP-Seq(GSE32465)/Homer	GCAGCCAAGCRTGACH	1e-07	-16.49	0	1562	0.0492	1352.6	0.0431
AT5G61620(MYBrelated)/colamp-AT5G61620-DAP-Seq(GSE60143)/Homer	CTTATCCA	1e-07	-16.46	0	2830	0.0892	2542.4	0.081
MYB(HTH)/ERMYB-Myb-ChIPSeq(GSE22095)/Homer	GGCVGTTR	1e-07	-16.18	0	5662	0.1784	5254.6	0.1674
TEAD1(TEAD)/HepG2-TEAD1-ChIP-Seq(Encode)/Homer	CYRCATTCCA	1e-06	-16.11	0	2294	0.0723	2040	0.065
TEAD3(TEA)/HepG2-TEAD3-ChIP-Seq(Encode)/Homer	TRCATTCCAG	1e-06	-15.95	0	2670	0.0841	2395	0.0763
LEF1(HMG)/H1-LEF1-ChIP-Seq(GSE64758)/Homer	CCTTTGATST	1e-06	-15.62	0	1558	0.0491	1354	0.0431
ATHB20(Homeobox)/colamp-ATHB20-DAP-Seq(GSE60143)/Homer	CAATHATT	1e-06	-15.49	0	435	0.0137	334.9	0.0107
EBF1(EBF)/Near-E2A-ChIP-Seq(GSE21512)/Homer	GTCCCCWGGGGA	1e-06	-15.41	0	4654	0.1467	4293.6	0.1368
MYB3R5(MYB)/col-MYB3R5-DAP-Seq(GSE60143)/Homer	THYAACGGTHAWAWT	1e-06	-15.31	0	146	0.0046	92.1	0.0029
E2F7(E2F)/Hela-E2F7-ChIP-Seq(GSE32673)/Homer	VDTTTCCCGCCA	1e-06	-15.25	0	818	0.0258	676.4	0.0215
Bach1(bZIP)/K562-Bach1-ChIP-Seq(GSE31477)/Homer	AWWNTGCTGAGTCAT	1e-06	-15.16	0	138	0.0043	86.7	0.0028
ATHB53(HB)/col-ATHB53-DAP-Seq(GSE60143)/Homer	CAATAATT	1e-06	-15.09	0	494	0.0156	387.2	0.0123
USF1(bHLH)/GM12878-Usf1-ChIP-Seq(GSE32465)/Homer	SGTCACGTGR	1e-06	-14.98	0	1710	0.0539	1500.5	0.0478
GBF5(bZIP)/colamp-GBF5-DAP-Seq(GSE60143)/Homer	WKNWSACGTGGCAWN	1e-06	-14.84	0	916	0.0289	767.9	0.0245
TCP7(TCP)/col-TCP7-DAP-Seq(GSE60143)/Homer	GTGGGSCCCACHHNN	1e-06	-14.8	0	2082	0.0656	1850.1	0.0589
MYB118(MYB)/colamp-MYB118-DAP-Seq(GSE60143)/Homer	TAWCCGTTAC	1e-06	-14.78	0	717	0.0226	587.1	0.0187
Tbx6(T-box)/ESC-Tbx6-ChIP-Seq(GSE93524)/Homer	DAGGTGTBAA	1e-06	-14.74	0	2957	0.0932	2678.6	0.0853
SeqBias: G/A bias	RRRRRRRRRR	1e-06	-14.73	0	31726	0.9998	31356.8	0.999
Mef2d(MADS)/Retina-Mef2d-ChIP-Seq(GSE61391)/Homer	GCTATTTTTAGC	1e-06	-14.72	0	274	0.0086	198.1	0.0063
ATHB6(Homeobox)/Arabidopsis-HB6-ChIP-Seq(GSE80564)/Homer	CAATNATTBN	1e-06	-14.71	0	868	0.0274	724.8	0.0231
BATF(bZIP)/Th17-BATF-ChIP-Seq(GSE39756)/Homer	DATGASTCAT	1e-06	-14.67	0	1421	0.0448	1233	0.0393
AT2G31460(REMB3)/col-AT2G31460-DAP-Seq(GSE60143)/Homer	WNWARWDGAAATGAT	1e-06	-14.5	0	584	0.0184	469.2	0.0149
HIF-1a(bHLH)/MCF7-HIF1a-ChIP-Seq(GSE28352)/Homer	TACGTGCV	1e-06	-14.41	0	989	0.0312	836.6	0.0267
CLOCK(bHLH)/Liver-Clock-ChIP-Seq(GSE39860)/Homer	GHCACGTG	1e-06	-14.34	0	1976	0.0623	1754.5	0.0559
IRF3(IRF)/BMDM-Irf3-ChIP-Seq(GSE67343)/Homer	AGTTTCAKTTTC	1e-06	-13.96	0	725	0.0228	598.5	0.0191
GATA20(C2C2gata)/colamp-GATA20-DAP-Seq(GSE60143)/Homer	TNGATCNDNM	1e-06	-13.9	0	5478	0.1726	5105.8	0.1627
Unknown5/Drosophila-Promoters/Homer	GCTGATAASV	1e-06	-13.89	0	1467	0.0462	1281.8	0.0408
Tcfcp2l1(CP2)/mES-Tcfcp2l1-ChIP-Seq(GSE11431)/Homer	NRAACCRGTTYRAACCRGYT	1e-05	-13.72	0	615	0.0194	500.9	0.016
LOB(LOBAS2)/col-LOB-DAP-Seq(GSE60143)/Homer	CGCCGKAWWTTHCGS	1e-05	-13.51	0	1536	0.0484	1348.9	0.043
E2F(E2F)/Hela-CellCycle-Expression/Homer	TTSGCGCGAAAA	1e-05	-13.39	0	380	0.012	293.8	0.0094
AtHB32(ZFHD)/col200-AtHB32-DAP-Seq(GSE60143)/Homer	CGAATTAT	1e-05	-13.26	0	1488	0.0469	1305.3	0.0416
DEL2(E2FDP)/col-DEL2-DAP-Seq(GSE60143)/Homer	WTTTCSCGCC	1e-05	-13.21	0	1616	0.0509	1425.3	0.0454
Arnt:Ahr(bHLH)/MCF7-Arnt-ChIP-Seq(Lo_et_al.)/Homer	TBGCACGCAA	1e-05	-13.08	0	2594	0.0817	2349.3	0.0748
HIF2a(bHLH)/785_O-HIF2a-ChIP-Seq(GSE34871)/Homer	GCACGTACCC	1e-05	-13.07	0	1374	0.0433	1200.8	0.0383
ETS:E-box(ETS,bHLH)/HPC7-Scl-ChIP-Seq(GSE22178)/Homer	AGGAARCAGCTG	1e-05	-13.02	0	306	0.0096	230.2	0.0073
E2FA(E2FDP)/colamp-E2FA-DAP-Seq(GSE60143)/Homer	WWTGGCGCCAWWWNN	1e-05	-12.9	0	1971	0.0621	1761.6	0.0561
E-box(bHLH)/Promoter/Homer	SSGGTCACGTGA	1e-05	-12.74	0	440	0.0139	348.2	0.0111
GATA15(C2C2gata)/col-GATA15-DAP-Seq(GSE60143)/Homer	KATGATCA	1e-05	-12.74	0	2973	0.0937	2713.5	0.0865
Tcf3(HMG)/mES-Tcf3-ChIP-Seq(GSE11724)/Homer	ASWTCAAAGG	1e-05	-12.58	0	657	0.0207	543.6	0.0173
YY1(Zf)/Promoter/Homer	CAAGATGGCGGC	1e-05	-12.55	0	567	0.0179	462.7	0.0147
PGR(NR)/EndoStromal-PGR-ChIP-Seq(GSE69539)/Homer	AAGAACATWHTGTTC	1e-05	-12.49	0	512	0.0161	413.6	0.0132
bHLH34(bHLH)/colamp-bHLH34-DAP-Seq(GSE60143)/Homer	HGWGRHWGACACGTG	1e-05	-12.45	0	1004	0.0316	861.5	0.0274
Dorsal(RHD)/Embryo-dl-ChIP-Seq(GSE65441)/Homer	GGGAAAAMCCCG	1e-05	-12.44	0	562	0.0177	458.8	0.0146
ATHB6(Homeobox)/col-ATHB6-DAP-Seq(GSE60143)/Homer	AATGATTG	1e-05	-12.39	0	1540	0.0485	1360.4	0.0433
LBD13(LOBAS2)/colamp-LBD13-DAP-Seq(GSE60143)/Homer	KCCGTNWTTTBCGGC	1e-05	-12.28	0	4491	0.1415	4174.3	0.133
ZNF322(Zf)/HEK293-ZNF322.GFP-ChIP-Seq(GSE58341)/Homer	GAGCCTGGTACTGWGCCTGR	1e-05	-12.18	0	1189	0.0375	1034.6	0.033
NRF(NRF)/Promoter/Homer	STGCGCATGCGC	1e-05	-12.11	0	1282	0.0404	1121.6	0.0357
IRF1(IRF)/PBMC-IRF1-ChIP-Seq(GSE43036)/Homer	GAAAGTGAAAGT	1e-05	-12.03	0	345	0.0109	267.9	0.0085
Unknown-ESC-element(?)/mES-Nanog-ChIP-Seq(GSE11724)/Homer	CACAGCAGGGGG	1e-05	-12.02	0	2146	0.0676	1935	0.0616
ATHB33(ZFHD)/col-ATHB33-DAP-Seq(GSE60143)/Homer	NGTRATTAAK	1e-05	-12.02	0	1999	0.063	1796	0.0572
HRE(HSF)/Striatum-HSF1-ChIP-Seq(GSE38000)/Homer	TTCTAGAABNTTCTA	1e-05	-11.93	0	487	0.0153	393.5	0.0125
Zic(Zf)/Cerebellum-ZIC1.2-ChIP-Seq(GSE60731)/Homer	CCTGCTGAGH	1e-05	-11.9	0	3267	0.103	3003.6	0.0957
Six4(Homeobox)/MCF7-SIX4-ChIP-Seq(Encode)/Homer	TGWAAYCTGABACCB	1e-05	-11.88	0	132	0.0042	87.9	0.0028
SeqBias: A/T bias	WWWWWWWWWW	1e-05	-11.72	0	18895	0.5954	18314.6	0.5835
Tcf21(bHLH)/ArterySmoothMuscle-Tcf21-ChIP-Seq(GSE61369)/Homer	NAACAGCTGG	1e-05	-11.69	0	3490	0.11	3219.9	0.1026
E-box/Arabidopsis-Promoters/Homer	GCCACGTG	1e-05	-11.69	0	1835	0.0578	1643.7	0.0524
NAM(NAC)/col-NAM-DAP-Seq(GSE60143)/Homer	RGTTRCGTRW	1e-05	-11.67	0	3351	0.1056	3086.8	0.0983
LBD2(LOBAS2)/colamp-LBD2-DAP-Seq(GSE60143)/Homer	TCCGAWTTTTTCGGN	1e-05	-11.62	0	1073	0.0338	930.6	0.0297
DREB19(AP2EREBP)/colamp-DREB19-DAP-Seq(GSE60143)/Homer	AATGTCGGTK	1e-05	-11.61	0	1991	0.0627	1791.3	0.0571
GATA:SCL(Zf,bHLH)/Ter119-SCL-ChIP-Seq(GSE18720)/Homer	CRGCTGBNGNSNNSAGATAA	0.0001	-11.49	0	312	0.0098	240.3	0.0077
NFkB-p65(RHD)/GM12787-p65-ChIP-Seq(GSE19485)/Homer	WGGGGATTTCCC	0.0001	-11.49	0	1474	0.0465	1306	0.0416
IRF2(IRF)/Erythroblas-IRF2-ChIP-Seq(GSE36985)/Homer	GAAASYGAAASY	0.0001	-11.48	0	320	0.0101	247.3	0.0079
RRTF1(AP2EREBP)/colamp-RRTF1-DAP-Seq(GSE60143)/Homer	CCGCCGCHATTT	0.0001	-10.88	0.0001	1086	0.0342	947.3	0.0302
Sp5(Zf)/mES-Sp5.Flag-ChIP-Seq(GSE72989)/Homer	RGKGGGCGGAGC	0.0001	-10.87	0.0001	7009	0.2209	6634.6	0.2114
SPCH(bHLH)/Seedling-SPCH-ChIP-Seq(GSE57497)/Homer	WNBCACGTGA	0.0001	-10.65	0.0001	3328	0.1049	3076.3	0.098
At5g08750(C3H)/col-At5g08750-DAP-Seq(GSE60143)/Homer	NWDTTGCGGCTR	0.0001	-10.64	0.0001	1606	0.0506	1436.6	0.0458
SeqBias: C/A-bias	MMMMMMMMMM	0.0001	-10.61	0.0001	31714	0.9994	31343.9	0.9986
GFY-Staf(?,Zf)/Promoter/Homer	RACTACAATTCCCAGAAKGC	0.0001	-10.58	0.0001	346	0.0109	273.2	0.0087
ABI5(bZIP)/col-ABI5-DAP-Seq(GSE60143)/Homer	GCCACGTG	0.0001	-10.5	0.0001	1540	0.0485	1375.7	0.0438
AT3G25990(Trihelix)/colamp-AT3G25990-DAP-Seq(GSE60143)/Homer	TTAACCATAG	0.0001	-10.41	0.0001	1351	0.0426	1198.9	0.0382
ATHB7(Homeobox)/col-ATHB7-DAP-Seq(GSE60143)/Homer	AATGATTG	0.0001	-10.4	0.0001	976	0.0308	848.3	0.027
Unknown1(NR/Ini-like)/Drosophila-Promoters/Homer	MYGGTCACACTG	0.0001	-10.36	0.0001	647	0.0204	545.6	0.0174
MYB105(MYB)/colamp-MYB105-DAP-Seq(GSE60143)/Homer	RATWCCGTTA	0.0001	-10.31	0.0001	1099	0.0346	963.3	0.0307
GBF6(bZIP)/colamp-GBF6-DAP-Seq(GSE60143)/Homer	WWTGMCACGTCABCW	0.0001	-9.928	0.0002	675	0.0213	573.1	0.0183
MYB77(MYB)/col-MYB77-DAP-Seq(GSE60143)/Homer	NYAACBGYMC	0.0001	-9.708	0.0002	3827	0.1206	3568.3	0.1137
AREB3(bZIP)/col-AREB3-DAP-Seq(GSE60143)/Homer	NKGMCACGTGDCMNN	0.0001	-9.632	0.0002	993	0.0313	869.2	0.0277
GRE(NR),IR3/A549-GR-ChIP-Seq(GSE32465)/Homer	NRGVACABNVTGTYCY	0.0001	-9.624	0.0002	408	0.0129	332.8	0.0106
TGA2(bZIP)/colamp-TGA2-DAP-Seq(GSE60143)/Homer	ACGTCAYCHH	0.0001	-9.478	0.0003	1778	0.056	1609.2	0.0513
ATHB21(HB)/colamp-ATHB21-DAP-Seq(GSE60143)/Homer	YCAATWAT	0.0001	-9.389	0.0003	603	0.019	510.6	0.0163
CDM1(C3H)/colamp-CDM1-DAP-Seq(GSE60143)/Homer	CCGAWAWTWTCGGAN	0.0001	-9.359	0.0003	325	0.0102	259.8	0.0083
HAT1(Homeobox)/col-HAT1-DAP-Seq(GSE60143)/Homer	SCAATCATTGNN	0.0001	-9.335	0.0003	191	0.006	142.1	0.0045
REM16(ABI3VP1)/col-REM16-DAP-Seq(GSE60143)/Homer	DTTTTTSCCGSMAAA	0.0001	-9.327	0.0003	7	0.0002	1.9	0.0001
Ap4(bHLH)/AML-Tfap4-ChIP-Seq(GSE45738)/Homer	NAHCAGCTGD	0.001	-9.204	0.0003	4384	0.1382	4113.8	0.1311
STAT5(Stat)/mCD4+-Stat5-ChIP-Seq(GSE12346)/Homer	RTTTCTNAGAAA	0.001	-9.203	0.0003	863	0.0272	751.2	0.0239
DREF/Drosophila-Promoters/Homer	AVYTATCGATAD	0.001	-9.127	0.0004	21	0.0007	8.4	0.0003
MYB88(MYB)/col-MYB88-DAP-Seq(GSE60143)/Homer	HNACGCTCCT	0.001	-8.93	0.0004	10068	0.3173	9660.4	0.3078
bHLHE41(bHLH)/proB-Bhlhe41-ChIP-Seq(GSE93764)/Homer	KCACGTGMCN	0.001	-8.795	0.0005	4803	0.1514	4525.6	0.1442
bZIP52(bZIP)/colamp-bZIP52-DAP-Seq(GSE60143)/Homer	NDNHCAGCTGTCANN	0.001	-8.792	0.0005	3909	0.1232	3660.5	0.1166
Hoxd10(Homeobox)/ChickenMSG-Hoxd10.Flag-ChIP-Seq(GSE86088)/Homer	GGCMATGAAA	0.001	-8.674	0.0006	2111	0.0665	1934.4	0.0616
ZNF416(Zf)/HEK293-ZNF416.GFP-ChIP-Seq(GSE58341)/Homer	WDNCTGGGCA	0.001	-8.601	0.0006	5107	0.1609	4823	0.1537
bHLH74(bHLH)/col-bHLH74-DAP-Seq(GSE60143)/Homer	DRATCACGTGAB	0.001	-8.587	0.0006	1033	0.0326	914.3	0.0291
Cbf1(bHLH)/Yeast-Cbf1-ChIP-Seq(GSE29506)/Homer	TCACGTGAYH	0.001	-8.545	0.0006	960	0.0303	846.1	0.027
CAMTA1(CAMTA)/col-CAMTA1-DAP-Seq(GSE60143)/Homer	WWAACGCGTT	0.001	-8.521	0.0006	2104	0.0663	1929.9	0.0615
CArG(MADS)/PUER-Srf-ChIP-Seq(Sullivan_et_al.)/Homer	CCATATATGGNM	0.001	-8.44	0.0007	607	0.0191	519.6	0.0166
Pdx1(Homeobox)/Islet-Pdx1-ChIP-Seq(SRA008281)/Homer	YCATYAATCA	0.001	-8.416	0.0007	1492	0.047	1348.4	0.043
ZNF528(Zf)/HEK293-ZNF528.GFP-ChIP-Seq(GSE58341)/Homer	AGAAATGACTTCCCT	0.001	-8.366	0.0007	25	0.0008	11.6	0.0004
SPL5(SBP)/colamp-SPL5-DAP-Seq(GSE60143)/Homer	NNHGTACGGHNN	0.001	-8.351	0.0008	1162	0.0366	1037.6	0.0331
At1g78700(BZR)/col-At1g78700-DAP-Seq(GSE60143)/Homer	NNNNCACGTGNNNNN	0.001	-8.329	0.0008	1049	0.0331	931.4	0.0297
Isl1(Homeobox)/Neuron-Isl1-ChIP-Seq(GSE31456)/Homer	CTAATKGV	0.001	-8.253	0.0008	4091	0.1289	3844.3	0.1225
ATHB40(HB)/col-ATHB40-DAP-Seq(GSE60143)/Homer	HCAATWATTG	0.001	-8.235	0.0008	858	0.027	753.3	0.024
BORIS(Zf)/K562-CTCFL-ChIP-Seq(GSE32465)/Homer	CNNBRGCGCCCCCTGSTGGC	0.001	-8.221	0.0008	1215	0.0383	1088	0.0347
TGA1(bZIP)/colamp-TGA1-DAP-Seq(GSE60143)/Homer	TGACGTCAKC	0.001	-8.217	0.0008	1181	0.0372	1057	0.0337
bZIP53(bZIP)/colamp-bZIP53-DAP-Seq(GSE60143)/Homer	NDNHSACGTGKMNNN	0.001	-8.183	0.0009	1019	0.0321	904.8	0.0288
ZBTB33(Zf)/GM12878-ZBTB33-ChIP-Seq(GSE32465)/Homer	GGVTCTCGCGAGAAC	0.001	-8.153	0.0009	343	0.0108	280.3	0.0089
BOS1(MYB)/col-BOS1-DAP-Seq(GSE60143)/Homer	NNRCCTAACT	0.001	-8.069	0.001	2457	0.0774	2272.8	0.0724
At4g36780(BZR)/col-At4g36780-DAP-Seq(GSE60143)/Homer	NNNNNNCACGTGNNN	0.001	-7.957	0.0011	1065	0.0336	949.6	0.0303
SRS7(SRS)/colamp-SRS7-DAP-Seq(GSE60143)/Homer	HATAGGTTTH	0.001	-7.904	0.0011	10459	0.3296	10066.9	0.3207
bHLHE40(bHLH)/HepG2-BHLHE40-ChIP-Seq(GSE31477)/Homer	KCACGTGMCN	0.001	-7.805	0.0013	1244	0.0392	1119.9	0.0357
Mef2a(MADS)/HL1-Mef2a.biotin-ChIP-Seq(GSE21529)/Homer	CYAAAAATAG	0.001	-7.788	0.0013	632	0.0199	546.2	0.0174
HY5(bZIP)/colamp-HY5-DAP-Seq(GSE60143)/Homer	RRTSACGTSD	0.001	-7.74	0.0013	2661	0.0839	2472.8	0.0788
E-box/Drosophila-Promoters/Homer	AACAGCTGTTHN	0.001	-7.705	0.0014	680	0.0214	591.8	0.0189
EMB1789(C3H)/col-EMB1789-DAP-Seq(GSE60143)/Homer	TWTTTACCGYND	0.001	-7.672	0.0014	615	0.0194	531.5	0.0169
Six2(Homeobox)/NephronProgenitor-Six2-ChIP-Seq(GSE39837)/Homer	GWAAYHTGAKMC	0.001	-7.658	0.0014	2170	0.0684	2002.2	0.0638
bZIP48(bZIP)/colamp-bZIP48-DAP-Seq(GSE60143)/Homer	DDWWKVTSACGTGGC	0.001	-7.631	0.0015	976	0.0308	868.5	0.0277
ISRE(IRF)/ThioMac-LPS-Expression(GSE23622)/Homer	AGTTTCASTTTC	0.001	-7.574	0.0015	156	0.0049	117.8	0.0038
Eomes(T-box)/H9-Eomes-ChIP-Seq(GSE26097)/Homer	ATTAACACCT	0.001	-7.561	0.0016	4821	0.1519	4563.2	0.1454
ATHB24(ZFHD)/colamp-ATHB24-DAP-Seq(GSE60143)/Homer	TAATTAAS	0.001	-7.467	0.0017	1066	0.0336	954.7	0.0304
AT1G28160(AP2EREBP)/colamp-AT1G28160-DAP-Seq(GSE60143)/Homer	GGCGGCGG	0.001	-7.417	0.0018	10641	0.3353	10256.6	0.3268
PAX5(Paired,Homeobox),condensed/GM12878-PAX5-ChIP-Seq(GSE32465)/Homer	GTCACGCTCSCTGM	0.001	-7.402	0.0018	435	0.0137	367.6	0.0117
ANAC045(NAC)/col-ANAC045-DAP-Seq(GSE60143)/Homer	DNCKTVNNNNNNAMG	0.001	-7.398	0.0018	5694	0.1794	5415.7	0.1725
ATHB23(ZFHD)/col-ATHB23-DAP-Seq(GSE60143)/Homer	HTAATTARNN	0.001	-7.356	0.0019	1264	0.0398	1142.3	0.0364
AMYB(HTH)/Testes-AMYB-ChIP-Seq(GSE44588)/Homer	TGGCAGTTGG	0.001	-7.312	0.002	4729	0.149	4479	0.1427
MYB116(MYB)/colamp-MYB116-DAP-Seq(GSE60143)/Homer	AGTTAGGCAN	0.001	-7.287	0.002	1659	0.0523	1518.3	0.0484
AGL6(MADS)/col-AGL6-DAP-Seq(GSE60143)/Homer	TTWCCWWAWWDGGWA	0.001	-7.271	0.002	134	0.0042	99.8	0.0032
AT1G69570(C2C2dof)/col-AT1G69570-DAP-Seq(GSE60143)/Homer	WAAAAGTGHH	0.001	-7.27	0.002	2359	0.0743	2188.9	0.0697
VND6(NAC)/col-VND6-DAP-Seq(GSE60143)/Homer	DCTTNHTTTTYAMGY	0.001	-7.233	0.0021	2524	0.0795	2347.9	0.0748
AT3G52440(C2C2dof)/colamp-AT3G52440-DAP-Seq(GSE60143)/Homer	DTHACTTTTT	0.001	-7.176	0.0022	4885	0.1539	4632.2	0.1476
ATHB34(ZFHD)/colamp-ATHB34-DAP-Seq(GSE60143)/Homer	TRATTARS	0.001	-7.149	0.0023	1151	0.0363	1037.2	0.033
MYB41(MYB)/col-MYB41-DAP-Seq(GSE60143)/Homer	BYTYACCTAA	0.001	-7.097	0.0024	948	0.0299	846.7	0.027
Nkx6.1(Homeobox)/Islet-Nkx6.1-ChIP-Seq(GSE40975)/Homer	GKTAATGR	0.001	-7.03	0.0025	4315	0.136	4082	0.1301
At1g19210(AP2EREBP)/colamp-At1g19210-DAP-Seq(GSE60143)/Homer	HCACCGACCAHN	0.001	-6.973	0.0027	5093	0.1605	4838.9	0.1542
Tgif2(Homeobox)/mES-Tgif2-ChIP-Seq(GSE55404)/Homer	TGTCANYT	0.001	-6.937	0.0028	8972	0.2827	8629.1	0.2749
AGL63(MADS)/col-AGL63-DAP-Seq(GSE60143)/Homer	TTCCAAWWWTGG	0.001	-6.933	0.0028	1245	0.0392	1128.4	0.036
AT5G56840(MYBrelated)/colamp-AT5G56840-DAP-Seq(GSE60143)/Homer	TGGATAAGGT	0.01	-6.903	0.0029	2177	0.0686	2018.4	0.0643
c-Myc(bHLH)/LNCAP-cMyc-ChIP-Seq(Unpublished)/Homer	VCCACGTG	0.01	-6.894	0.0029	2155	0.0679	1997.4	0.0636
At5g08330(TCP)/col-At5g08330-DAP-Seq(GSE60143)/Homer	GGRCCCAC	0.01	-6.831	0.0031	2589	0.0816	2415.4	0.077
ZNF264(Zf)/HEK293-ZNF264.GFP-ChIP-Seq(GSE58341)/Homer	RGGGCACTAACY	0.01	-6.748	0.0033	2355	0.0742	2191.1	0.0698
KLF5(Zf)/LoVo-KLF5-ChIP-Seq(GSE49402)/Homer	DGGGYGKGGC	0.01	-6.725	0.0034	7828	0.2467	7513.9	0.2394
MYB57(MYB)/col-MYB57-DAP-Seq(GSE60143)/Homer	TTACCTAACT	0.01	-6.707	0.0034	918	0.0289	821.4	0.0262
CAMTA5(CAMTA)/col-CAMTA5-DAP-Seq(GSE60143)/Homer	ACGCGTTTTANACRC	0.01	-6.687	0.0035	772	0.0243	684.9	0.0218
AGL15(MADS)/col-AGL15-DAP-Seq(GSE60143)/Homer	TTTCCHWATWDGGAA	0.01	-6.667	0.0035	186	0.0059	146.1	0.0047
ABF1(bZIP)/Arabidopsis-ABF1-ChIP-Seq(GSE80564)/Homer	CACGTGGC	0.01	-6.66	0.0036	3112	0.0981	2922.3	0.0931
ATHB25(ZFHD)/colamp-ATHB25-DAP-Seq(GSE60143)/Homer	TAATTAVB	0.01	-6.603	0.0038	1583	0.0499	1453.9	0.0463
Hoxa13(Homeobox)/ChickenMSG-Hoxa13.Flag-ChIP-Seq(GSE86088)/Homer	CYHATAAAAN	0.01	-6.557	0.0039	4397	0.1386	4170	0.1329
PIF7(bHLH)/col-PIF7-DAP-Seq(GSE60143)/Homer	CCACGTGGNH	0.01	-6.525	0.004	760	0.0239	674.9	0.0215
ANL2(HB)/col-ANL2-DAP-Seq(GSE60143)/Homer	CATTAATTGC	0.01	-6.517	0.0041	623	0.0196	546.9	0.0174
AT1G72740(MYBrelated)/colamp-AT1G72740-DAP-Seq(GSE60143)/Homer	NNWWAMCCTAAHWNN	0.01	-6.517	0.0041	2438	0.0768	2274.7	0.0725
MYB33(MYB)/col-MYB33-DAP-Seq(GSE60143)/Homer	DDTYNGTTAN	0.01	-6.48	0.0042	3412	0.1075	3215.4	0.1024
bHLH28(bHLH)/col-bHLH28-DAP-Seq(GSE60143)/Homer	NHHTGTACGGAH	0.01	-6.457	0.0043	705	0.0222	623.5	0.0199
ANAC079(NAC)/colamp-ANAC079-DAP-Seq(GSE60143)/Homer	TACACGCAACCT	0.01	-6.417	0.0044	926	0.0292	831.3	0.0265
O2(bZIP)/Corn-O2-ChIP-Seq(GSE63991)/Homer	GCTGACGTGGCA	0.01	-6.36	0.0047	552	0.0174	481.4	0.0153
ABF2(bZIP)/col-ABF2-DAP-Seq(GSE60143)/Homer	KGMCACGTGDCMHHH	0.01	-6.306	0.0049	723	0.0228	641.2	0.0204
NeuroG2(bHLH)/Fibroblast-NeuroG2-ChIP-Seq(GSE75910)/Homer	ACCATCTGTT	0.01	-6.299	0.005	4715	0.1486	4483.9	0.1429
TFE3(bHLH)/MEF-TFE3-ChIP-Seq(GSE75757)/Homer	GTCACGTGACYV	0.01	-6.281	0.005	364	0.0115	308.5	0.0098
ZNF669(Zf)/HEK293-ZNF669.GFP-ChIP-Seq(GSE58341)/Homer	GARTGGTCATCGCCC	0.01	-6.247	0.0052	277	0.0087	229.1	0.0073
M1BP(Zf)/S2R+-M1BP-ChIP-Seq(GSE49842)/Homer	CAGTGTGACCGT	0.01	-6.211	0.0054	751	0.0237	668.6	0.0213
ANAC047(NAC)/colamp-ANAC047-DAP-Seq(GSE60143)/Homer	WACACGTAACTT	0.01	-6.189	0.0055	1668	0.0526	1539.8	0.0491
Tcf4(HMG)/Hct116-Tcf4-ChIP-Seq(SRA012054)/Homer	ASATCAAAGGVA	0.01	-6.135	0.0058	1008	0.0318	911.8	0.0291
HSFC1(HSF)/col-HSFC1-DAP-Seq(GSE60143)/Homer	HTTCTAGAADCTTCT	0.01	-6.047	0.0063	456	0.0144	394	0.0126
BIM2(bHLH)/col-BIM2-DAP-Seq(GSE60143)/Homer	NNNNCACGTGNN	0.01	-6.044	0.0063	2375	0.0748	2220.6	0.0707
ATHB18(Homeobox)/colamp-ATHB18-DAP-Seq(GSE60143)/Homer	YCAATSATTG	0.01	-5.934	0.007	192	0.0061	154.3	0.0049
Atoh1(bHLH)/Cerebellum-Atoh1-ChIP-Seq(GSE22111)/Homer	VNRVCAGCTGGY	0.01	-5.913	0.0071	3729	0.1175	3532.2	0.1125
HAT2(Homeobox)/colamp-HAT2-DAP-Seq(GSE60143)/Homer	CYAATSATTR	0.01	-5.894	0.0072	1131	0.0356	1030.8	0.0328
At1g75490(AP2EREBP)/colamp-At1g75490-DAP-Seq(GSE60143)/Homer	CACCGMCT	0.01	-5.891	0.0072	7512	0.2367	7223.4	0.2301
NPAS(bHLH)/Liver-NPAS-ChIP-Seq(GSE39860)/Homer	NVCACGTG	0.01	-5.842	0.0076	4451	0.1403	4235.7	0.135
Unknown6/Drosophila-Promoters/Homer	AATTTTAAAA	0.01	-5.811	0.0078	1009	0.0318	915.7	0.0292
bZIP16(bZIP)/colamp-bZIP16-DAP-Seq(GSE60143)/Homer	TGCCACGTGD	0.01	-5.796	0.0079	917	0.0289	828.5	0.0264
AR-halfsite(NR)/LNCaP-AR-ChIP-Seq(GSE27824)/Homer	CCAGGAACAG	0.01	-5.79	0.0079	12878	0.4058	12500.8	0.3983
REB1/SacCer-Promoters/Homer	KCCGGGTAAYRR	0.01	-5.753	0.0082	510	0.0161	446.9	0.0142
MafA(bZIP)/Islet-MafA-ChIP-Seq(GSE30298)/Homer	TGCTGACTCA	0.01	-5.735	0.0083	2649	0.0835	2489.6	0.0793
At4g18890(BZR)/col-At4g18890-DAP-Seq(GSE60143)/Homer	NDBRCACGTGYR	0.01	-5.689	0.0087	607	0.0191	537.2	0.0171
HOXB13(Homeobox)/ProstateTumor-HOXB13-ChIP-Seq(GSE56288)/Homer	TTTTATKRGG	0.01	-5.679	0.0088	1772	0.0558	1645.7	0.0524
bZIP3(bZIP)/col-bZIP3-DAP-Seq(GSE60143)/Homer	DWKNHSACGTGGCAD	0.01	-5.592	0.0095	1393	0.0439	1283.4	0.0409
TCF4(bHLH)/SHSY5Y-TCF4-ChIP-Seq(GSE96915)/Homer	SMCATCTGKH	0.01	-5.566	0.0098	4738	0.1493	4520.5	0.144
Zic3(Zf)/mES-Zic3-ChIP-Seq(GSE37889)/Homer	GGCCYCCTGCTGDGH	0.01	-5.562	0.0098	2701	0.0851	2542.1	0.081
bZIP68(bZIP)/col-bZIP68-DAP-Seq(GSE60143)/Homer	WGCCACGTGK	0.01	-5.473	0.0106	1117	0.0352	1021.8	0.0326
GRE(NR),IR3/RAW264.7-GRE-ChIP-Seq(Unpublished)/Homer	VAGRACAKWCTGTYC	0.01	-5.313	0.0125	621	0.0196	553.5	0.0176
MyoD(bHLH)/Myotube-MyoD-ChIP-Seq(GSE21614)/Homer	RRCAGCTGYTSY	0.01	-5.241	0.0134	3126	0.0985	2959.6	0.0943
EBF2(EBF)/BrownAdipose-EBF2-ChIP-Seq(GSE97114)/Homer	NABTCCCWDGGGAVH	0.01	-5.183	0.0141	3364	0.106	3191.6	0.1017
LIN-15B(Zf)/cElegans-L3-LIN15B-ChIP-Seq(modEncode)/Homer	CARTGGAGCGCRYTTGCATT	0.01	-5.13	0.0148	18	0.0006	9.4	0.0003
ANAC016(NAC)/col-ANAC016-DAP-Seq(GSE60143)/Homer	WNCTTGNNNNNCAMG	0.01	-5.048	0.0161	1946	0.0613	1821	0.058
CES-1(Homeobox)/cElegans-L1-CES1-ChIP-Seq(modEncode)/Homer	AAATTSAATTTN	0.01	-5.046	0.0161	557	0.0176	495.7	0.0158
MYB65(MYB)/colamp-MYB65-DAP-Seq(GSE60143)/Homer	RACNGTTA	0.01	-5.041	0.0161	2471	0.0779	2328.7	0.0742
bZIP28(bZIP)/col-bZIP28-DAP-Seq(GSE60143)/Homer	TGCCACGTSABH	0.01	-4.991	0.0169	871	0.0274	792.6	0.0253
At3g60580(C2H2)/col-At3g60580-DAP-Seq(GSE60143)/Homer	WTTYTACT	0.01	-4.985	0.0169	14399	0.4538	14025.2	0.4468
HSFA6B(HSF)/colamp-HSFA6B-DAP-Seq(GSE60143)/Homer	NTTCTAGAANHTTCT	0.01	-4.931	0.0178	985	0.031	901.8	0.0287
AT3G58630(Trihelix)/col-AT3G58630-DAP-Seq(GSE60143)/Homer	TCTCCGGCGA	0.01	-4.912	0.0181	927	0.0292	846.5	0.027
HSF7(HSF)/colamp-HSF7-DAP-Seq(GSE60143)/Homer	TTCTAGAAGCTTCTA	0.01	-4.896	0.0184	377	0.0119	328.1	0.0105
SPL3(SBP)/colamp-SPL3-DAP-Seq(GSE60143)/Homer	WDTTGTACGGAH	0.01	-4.865	0.0189	138	0.0043	111	0.0035
PRDM15(Zf)/ESC-Prdm15-ChIP-Seq(GSE73694)/Homer	YCCDNTCCAGGTTTT	0.01	-4.803	0.0201	3407	0.1074	3240.2	0.1032
At5g04390(C2H2)/col200-At5g04390-DAP-Seq(GSE60143)/Homer	AGTGANDN	0.01	-4.793	0.0202	16043	0.5056	15656	0.4988
Hoxc9(Homeobox)/Ainv15-Hoxc9-ChIP-Seq(GSE21812)/Homer	GGCCATAAATCA	0.01	-4.792	0.0202	734	0.0231	664.4	0.0212
Replumless(BLH)/Arabidopsis-RPL.GFP-ChIP-Seq(GSE78727)/Homer	HGTCWHATCA	0.01	-4.754	0.0209	2495	0.0786	2356.8	0.0751
VIP1(bZIP)/col-VIP1-DAP-Seq(GSE60143)/Homer	NTTGACAGCTGTCAN	0.01	-4.731	0.0214	548	0.0173	489.4	0.0156
HSFA1E(HSF)/col-HSFA1E-DAP-Seq(GSE60143)/Homer	TTCTAGAAGCTTCTA	0.01	-4.675	0.0225	184	0.0058	152.3	0.0049
Tbr1(T-box)/Cortex-Tbr1-ChIP-Seq(GSE71384)/Homer	AAGGTGTKAA	0.01	-4.667	0.0227	3007	0.0948	2854.4	0.0909
GLIS3(Zf)/Thyroid-Glis3.GFP-ChIP-Seq(GSE103297)/Homer	CTCCCTGGGAGGCCN	0.01	-4.661	0.0227	6830	0.2152	6586.8	0.2099
BMAL1(bHLH)/Liver-Bmal1-ChIP-Seq(GSE39860)/Homer	GNCACGTG	0.01	-4.629	0.0234	5012	0.1579	4809	0.1532
AT2G28810(C2C2dof)/colamp-AT2G28810-DAP-Seq(GSE60143)/Homer	VAAAAAGTWA	0.1	-4.571	0.0247	5425	0.171	5213.5	0.1661
p53(p53)/mES-cMyc-ChIP-Seq(GSE11431)/Homer	ACATGCCCGGGCAT	0.1	-4.565	0.0248	81	0.0026	61.4	0.002
SMB(NAC)/colamp-SMB-DAP-Seq(GSE60143)/Homer	CTTVNNNNDBAAGHW	0.1	-4.524	0.0258	1884	0.0594	1769.4	0.0564
LCL1(MYBrelated)/colamp-LCL1-DAP-Seq(GSE60143)/Homer	NAAAATATCTWHWWN	0.1	-4.513	0.026	141	0.0044	114.9	0.0037
Mef2b(MADS)/HEK293-Mef2b.V5-ChIP-Seq(GSE67450)/Homer	GCTATTTTTGGM	0.1	-4.497	0.0264	1256	0.0396	1165.6	0.0371
Tcf7(HMG)/GM12878-TCF7-ChIP-Seq(Encode)/Homer	CTTTGATGTGSB	0.1	-4.485	0.0266	751	0.0237	683.4	0.0218
Knotted(Homeobox)/Corn-KN1-ChIP-Seq(GSE39161)/Homer	GAYGNGACRGGN	0.1	-4.485	0.0266	5031	0.1585	4830.8	0.1539
HuR(?)/HEK293-HuR-CLIP-Seq(GSE87887)/Homer	BTTTGGTTTG	0.1	-4.465	0.0271	7624	0.2403	7370.7	0.2348
CTCF-SatelliteElement(Zf?)/CD4+-CTCF-ChIP-Seq(Barski_et_al.)/Homer	TGCAGTTCCMVNWRTGGCCA	0.1	-4.464	0.0271	44	0.0014	30.7	0.001
AT1G76880(Trihelix)/col-AT1G76880-DAP-Seq(GSE60143)/Homer	ACGGTAAAAW	0.1	-4.464	0.0271	467	0.0147	415.1	0.0132
Trl(Zf)/S2-GAGAfactor-ChIP-Seq(GSE40646)/Homer	RGAGAGAG	0.1	-4.431	0.0278	10691	0.3369	10386	0.3309
Gfi1b(Zf)/HPC7-Gfi1b-ChIP-Seq(GSE22178)/Homer	MAATCACTGC	0.1	-4.428	0.0278	1535	0.0484	1434	0.0457
PAX6(Paired,Homeobox)/Forebrain-Pax6-ChIP-Seq(GSE66961)/Homer	NGTGTTCAVTSAAGCGKAAA	0.1	-4.376	0.0292	222	0.007	188.6	0.006
HSFA6A(HSF)/col-HSFA6A-DAP-Seq(GSE60143)/Homer	RGAAGNTTCTAGAAN	0.1	-4.357	0.0297	110	0.0035	87.5	0.0028
MYB101(MYB)/colamp-MYB101-DAP-Seq(GSE60143)/Homer	TAACNRMY	0.1	-4.314	0.0309	4906	0.1546	4712.8	0.1502
EBF(EBF)/proBcell-EBF-ChIP-Seq(GSE21978)/Homer	DGTCCCYRGGGA	0.1	-4.308	0.0311	828	0.0261	758.3	0.0242
AT1G23810(Orphan)/col-AT1G23810-DAP-Seq(GSE60143)/Homer	TTCTAGAAGSTTCTA	0.1	-4.303	0.0311	103	0.0032	81.8	0.0026
Lhx3(Homeobox)/Neuron-Lhx3-ChIP-Seq(GSE31456)/Homer	ADBTAATTAR	0.1	-4.294	0.0314	2802	0.0883	2662.5	0.0848
Dlx3(Homeobox)/Kerainocytes-Dlx3-ChIP-Seq(GSE89884)/Homer	NDGTAATTAC	0.1	-4.286	0.0315	854	0.0269	783.1	0.0249
PIF5ox(bHLH)/Arabidopsis-PIF5ox-ChIP-Seq(GSE35062)/Homer	BCACGTGVDN	0.1	-4.277	0.0317	2954	0.0931	2810.5	0.0895
GBF3(bZIP)/Arabidopsis-GBF3-ChIP-Seq(GSE80564)/Homer	TGCCACGTSAYC	0.1	-4.266	0.032	1205	0.038	1119.2	0.0357
BAM8(BES1)/col-BAM8-DAP-Seq(GSE60143)/Homer	NNWSACACGTGTSWN	0.1	-4.253	0.0323	428	0.0135	380	0.0121
Sox15(HMG)/CPA-Sox15-ChIP-Seq(GSE62909)/Homer	RAACAATGGN	0.1	-4.211	0.0337	2284	0.072	2161.3	0.0689
ZNF675(Zf)/HEK293-ZNF675.GFP-ChIP-Seq(GSE58341)/Homer	ARGAGGMCAAAATGW	0.1	-4.198	0.034	313	0.0099	273.4	0.0087
ANAC042(NAC)/col-ANAC042-DAP-Seq(GSE60143)/Homer	CGTNDHNDHNACGKY	0.1	-4.17	0.0349	3402	0.1072	3248.5	0.1035
bZIP69(bZIP)/col-bZIP69-DAP-Seq(GSE60143)/Homer	GACAGCTGKCAW	0.1	-4.165	0.035	360	0.0113	317.6	0.0101
ZBTB18(Zf)/HEK293-ZBTB18.GFP-ChIP-Seq(GSE58341)/Homer	AACATCTGGA	0.1	-4.1	0.0373	1499	0.0472	1404.2	0.0447
MYNN(Zf)/HEK293-MYNN.eGFP-ChIP-Seq(Encode)/Homer	TTCAAAWTAAAAGTC	0.1	-4.06	0.0387	387	0.0122	343.1	0.0109
SOC1(MADS)/Seedling-SOC1-ChIP-Seq(GSE45846)/Homer	TWCCAWWTWTGG	0.1	-4.049	0.039	542	0.0171	489.2	0.0156
WRKY17(WRKY)/colamp-WRKY17-DAP-Seq(GSE60143)/Homer	GCGTTGACTTTT	0.1	-3.982	0.0417	23	0.0007	14	0.0004
RAP211(AP2EREBP)/colamp-RAP211-DAP-Seq(GSE60143)/Homer	RGCCGGCYWW	0.1	-3.973	0.0419	10494	0.3307	10207.8	0.3252
DUX(Homeobox)/C2C12-Dux-ChIP-Seq(GSE87279)/Homer	BCWGATTCAATCAAN	0.1	-3.929	0.0437	4	0.0001	0.9	0
SPL14(SBP)/col-SPL14-DAP-Seq(GSE60143)/Homer	NNWHTGTACGGAHNH	0.1	-3.923	0.0439	454	0.0143	407.2	0.013
ZNF692(Zf)/HEK293-ZNF692.GFP-ChIP-Seq(GSE58341)/Homer	GTGGGCCCCA	0.1	-3.912	0.0443	663	0.0209	605.7	0.0193
AGL95(ND)/col-AGL95-DAP-Seq(GSE60143)/Homer	TTCTAGAAGCTTCTA	0.1	-3.912	0.0443	241	0.0076	208.5	0.0066
OCT:OCT(POU,Homeobox)/NPC-Brn1-ChIP-Seq(GSE35496)/Homer	ATGAATATTCATGAG	0.1	-3.834	0.0476	12	0.0004	6.2	0.0002
Unknown1/Arabidopsis-Promoters/Homer	RGGGTAWWWTHGTAA	0.1	-3.823	0.0481	150	0.0047	126	0.004
bZIP44(bZIP)/colamp-bZIP44-DAP-Seq(GSE60143)/Homer	NDTGCCACGTCAGCH	0.1	-3.726	0.0528	77	0.0024	60.8	0.0019
Hoxd11(Homeobox)/ChickenMSG-Hoxd11.Flag-ChIP-Seq(GSE86088)/Homer	VGCCATAAAA	0.1	-3.709	0.0536	4606	0.1451	4434.4	0.1413
Rfx6(HTH)/Min6b1-Rfx6.HA-ChIP-Seq(GSE62844)/Homer	TGTTKCCTAGCAACM	0.1	-3.645	0.057	3927	0.1238	3772.3	0.1202
Srebp2(bHLH)/HepG2-Srebp2-ChIP-Seq(GSE31477)/Homer	CGGTCACSCCAC	0.1	-3.641	0.0571	442	0.0139	398.4	0.0127
AT1G12630(AP2EREBP)/colamp-AT1G12630-DAP-Seq(GSE60143)/Homer	TGTCGGCA	0.1	-3.615	0.0585	1568	0.0494	1478.4	0.0471
E2F1(E2F)/Hela-E2F1-ChIP-Seq(GSE22478)/Homer	CWGGCGGGAA	0.1	-3.602	0.0591	1574	0.0496	1484.2	0.0473
AT2G01818(PLATZ)/col-AT2G01818-DAP-Seq(GSE60143)/Homer	TCTAGAABSTTC	0.1	-3.57	0.0609	382	0.012	342.7	0.0109
E2F3(E2F)/MEF-E2F3-ChIP-Seq(GSE71376)/Homer	BTKGGCGGGAAA	0.1	-3.545	0.0623	3691	0.1163	3544.1	0.1129
ZNF519(Zf)/HEK293-ZNF519.GFP-ChIP-Seq(GSE58341)/Homer	GAGSCCGAGC	0.1	-3.541	0.0625	1281	0.0404	1202.9	0.0383
GT3a(Trihelix)/col-GT3a-DAP-Seq(GSE60143)/Homer	WNACACGTGTYWWAW	0.1	-3.521	0.0636	338	0.0107	301.4	0.0096
Pax8(Paired,Homeobox)/Thyroid-Pax8-ChIP-Seq(GSE26938)/Homer	GTCATGCHTGRCTGS	0.1	-3.505	0.0645	1212	0.0382	1136.6	0.0362
BIM3(bHLH)/col-BIM3-DAP-Seq(GSE60143)/Homer	TWVTCACGTGAB	0.1	-3.49	0.0653	524	0.0165	477.3	0.0152
AT3G09735(S1Falike)/col-AT3G09735-DAP-Seq(GSE60143)/Homer	TTCTAGAANMTTCTA	0.1	-3.432	0.0691	823	0.0259	763.9	0.0243
STAT6(Stat)/Macrophage-Stat6-ChIP-Seq(GSE38377)/Homer	TTCCKNAGAA	0.1	-3.405	0.0708	1060	0.0334	991.3	0.0316
NFkB-p65-Rel(RHD)/ThioMac-LPS-Expression(GSE23622)/Homer	GGAAATTCCC	0.1	-3.382	0.0723	163	0.0051	139.4	0.0044
CHR(?)/Hela-CellCycle-Expression/Homer	SRGTTTCAAA	0.1	-3.376	0.0725	991	0.0312	925.9	0.0295
Hoxa9(Homeobox)/ChickenMSG-Hoxa9.Flag-ChIP-Seq(GSE86088)/Homer	RGCAATNAAA	0.1	-3.373	0.0726	5690	0.1793	5505	0.1754
VND2(NAC)/col-VND2-DAP-Seq(GSE60143)/Homer	DNCKTNNNNNNNAAG	0.1	-3.363	0.0731	1930	0.0608	1833.9	0.0584
Pax7(Paired,Homeobox)/Myoblast-Pax7-ChIP-Seq(GSE25064)/Homer	TAATCAATTA	0.1	-3.321	0.0761	99	0.0031	81.9	0.0026
DREB2(AP2EREBP)/col-DREB2-DAP-Seq(GSE60143)/Homer	TMACCGACATWA	0.1	-3.305	0.0772	1540	0.0485	1456.2	0.0464
ERF15(AP2EREBP)/colamp-ERF15-DAP-Seq(GSE60143)/Homer	WDHAGCMGCCAT	0.1	-3.279	0.0791	10477	0.3302	10215.4	0.3255
ANAC083(NAC)/col-ANAC083-DAP-Seq(GSE60143)/Homer	CKTRWNNNWYAMGTA	0.1	-3.266	0.08	1315	0.0414	1239.3	0.0395
HAT5(Homeobox)/colamp-HAT5-DAP-Seq(GSE60143)/Homer	DCAATWATTG	0.1	-3.2	0.0852	126	0.004	106.1	0.0034
HSF6(HSF)/col-HSF6-DAP-Seq(GSE60143)/Homer	TTYTAGAAGCTTCTA	0.1	-3.194	0.0855	440	0.0139	400.6	0.0128
PBX2(Homeobox)/K562-PBX2-ChIP-Seq(Encode)/Homer	RTGATTKATRGN	0.1	-3.17	0.0874	1361	0.0429	1285.8	0.041
p63(p53)/Keratinocyte-p63-ChIP-Seq(GSE17611)/Homer	NNDRCATGYCYNRRCATGYH	0.1	-3.153	0.0887	1075	0.0339	1009.1	0.0322
GATA19(C2C2gata)/colamp-GATA19-DAP-Seq(GSE60143)/Homer	ATCSGATCVG	0.1	-3.135	0.0901	154	0.0049	132.2	0.0042
EPR1(MYBrelated)/colamp-EPR1-DAP-Seq(GSE60143)/Homer	AAATATCT	0.1	-3.126	0.0906	394	0.0124	357.6	0.0114
LHY1(MYBrelated)/col-LHY1-DAP-Seq(GSE60143)/Homer	AAATATCT	0.1	-3.126	0.0906	394	0.0124	357.6	0.0114
VND1(NAC)/col-VND1-DAP-Seq(GSE60143)/Homer	CTTRWDNHWYAAGYW	0.1	-3.118	0.0911	1482	0.0467	1403.7	0.0447
Unknown2/Arabidopsis-Promoters/Homer	AAACGACGTCGTTTT	0.1	-3.092	0.0933	11	0.0003	6.3	0.0002
ZNF317(Zf)/HEK293-ZNF317.GFP-ChIP-Seq(GSE58341)/Homer	GTCWGCTGTYYCTCT	0.1	-3.075	0.0947	229	0.0072	202.4	0.0064
BZR1(BZR)/col-BZR1-DAP-Seq(GSE60143)/Homer	NNCRCACGTGCG	0.1	-3.07	0.095	329	0.0104	296.5	0.0094
Sox6(HMG)/Myotubes-Sox6-ChIP-Seq(GSE32627)/Homer	CCATTGTTNY	0.1	-2.992	0.1024	3383	0.1066	3257.6	0.1038
dof42(C2C2dof)/col-dof42-DAP-Seq(GSE60143)/Homer	AAAAAGGC	0.1	-2.959	0.1057	1474	0.0465	1398.8	0.0446
Pho4(bHLH)/Yeast-Pho4-ChIP-Seq(GSE29506)/Homer	AAGCACGTGBGD	0.1	-2.94	0.1075	750	0.0236	699.8	0.0223
VND3(NAC)/colamp-VND3-DAP-Seq(GSE60143)/Homer	TRCTTGWDNHWCAAG	0.1	-2.912	0.1103	1275	0.0402	1206.1	0.0384
NTM1(NAC)/col-NTM1-DAP-Seq(GSE60143)/Homer	ACTTRTARAASAAGT	0.1	-2.88	0.1137	1077	0.0339	1015.3	0.0323
WRKY46(WRKY)/colamp-WRKY46-DAP-Seq(GSE60143)/Homer	AAAGTCAACGSN	0.1	-2.876	0.1139	133	0.0042	114.9	0.0037
Pitx1:Ebox(Homeobox,bHLH)/Hindlimb-Pitx1-ChIP-Seq(GSE41591)/Homer	YTAATTRAWWCCAGATGT	0.1	-2.876	0.1139	251	0.0079	224.3	0.0071
SVP(MADS)/col-SVP-DAP-Seq(GSE60143)/Homer	ANTTWCCHAATTTGG	0.1	-2.87	0.1141	671	0.0211	624.6	0.0199
NTM2(NAC)/col-NTM2-DAP-Seq(GSE60143)/Homer	CTTRTNNNAYAAGBH	0.1	-2.85	0.1162	1121	0.0353	1058.1	0.0337
bHLH157(bHLH)/col-bHLH157-DAP-Seq(GSE60143)/Homer	KACACGTCTCTY	0.1	-2.809	0.1208	498	0.0157	459.5	0.0146
AGL25(MADS)/colamp-AGL25-DAP-Seq(GSE60143)/Homer	TTTCCATWTWTGGAA	0.1	-2.73	0.1304	62	0.002	50.5	0.0016
Lhx2(Homeobox)/HFSC-Lhx2-ChIP-Seq(GSE48068)/Homer	TAATTAGN	0.1	-2.722	0.1312	1589	0.0501	1514.1	0.0482
Unknown3/Drosophila-Promoters/Homer	ACVAKCTGGCAGCGC	0.1	-2.709	0.1327	310	0.0098	281.5	0.009
MYB56(MYB)/colamp-MYB56-DAP-Seq(GSE60143)/Homer	HTAACGRMHY	0.1	-2.699	0.1337	1713	0.054	1635.9	0.0521
PRDM1(Zf)/Hela-PRDM1-ChIP-Seq(GSE31477)/Homer	ACTTTCACTTTC	0.1	-2.684	0.1354	1271	0.0401	1206.1	0.0384
dof24(C2C2dof)/col-dof24-DAP-Seq(GSE60143)/Homer	TWMCTTTTTG	0.1	-2.668	0.1374	4705	0.1483	4561.6	0.1453
ANAC071(NAC)/col-ANAC071-DAP-Seq(GSE60143)/Homer	DNCKTNDNNNHNAAG	0.1	-2.643	0.1405	1718	0.0541	1641.6	0.0523
Olig2(bHLH)/Neuron-Olig2-ChIP-Seq(GSE30882)/Homer	RCCATMTGTT	0.1	-2.642	0.1405	5562	0.1753	5403.5	0.1722
ANAC050(NAC)/colamp-ANAC050-DAP-Seq(GSE60143)/Homer	WNCTTGNNNNNCAAG	0.1	-2.639	0.1405	1231	0.0388	1168.2	0.0372
TCP16(TCP)/colamp-TCP16-DAP-Seq(GSE60143)/Homer	GTGGDCCYNNNNNNN	0.1	-2.636	0.1407	2434	0.0767	2339.2	0.0745
NFAT:AP1(RHD,bZIP)/Jurkat-NFATC1-ChIP-Seq(Jolma_et_al.)/Homer	SARTGGAAAAWRTGAGTCAB	0.1	-2.61	0.1441	269	0.0085	243.1	0.0077
NFY(CCAAT)/Promoter/Homer	RGCCAATSRG	0.1	-2.609	0.1441	2720	0.0857	2619.4	0.0835
FAR1(FAR1)/col-FAR1-DAP-Seq(GSE60143)/Homer	TKNNNYYCACGCGCY	0.1	-2.569	0.1496	692	0.0218	648.1	0.0207
Tcf12(bHLH)/GM12878-Tcf12-ChIP-Seq(GSE32465)/Homer	VCAGCTGYTG	0.1	-2.563	0.1501	3705	0.1168	3584.2	0.1142
NFkB-p50,p52(RHD)/Monocyte-p50-ChIP-Chip(Schreiber_et_al.)/Homer	GGGGGAATCCCC	0.1	-2.542	0.153	472	0.0149	437.7	0.0139
MNT(bHLH)/HepG2-MNT-ChIP-Seq(Encode)/Homer	DGCACACGTG	0.1	-2.52	0.1562	2868	0.0904	2766.1	0.0881
AT5G60130(ABI3VP1)/col-AT5G60130-DAP-Seq(GSE60143)/Homer	WTTYTAAGVAAA	0.1	-2.505	0.1581	2931	0.0924	2828.9	0.0901
ZFP3(Zf)/HEK293-ZFP3.GFP-ChIP-Seq(GSE58341)/Homer	GGGTTTTGAAGGATGARTAGGAGTT	0.1	-2.497	0.1588	3	0.0001	1.1	0
WRKY7(WRKY)/colamp-WRKY7-DAP-Seq(GSE60143)/Homer	AAAAGTCAACGSHWD	0.1	-2.497	0.1588	3	0.0001	1.8	0.0001
NFE2L2(bZIP)/HepG2-NFE2L2-ChIP-Seq(Encode)/Homer	AWWWTGCTGAGTCAT	0.1	-2.493	0.1591	120	0.0038	104.6	0.0033
Pax7(Paired,Homeobox),long/Myoblast-Pax7-ChIP-Seq(GSE25064)/Homer	TAATCHGATTAC	0.1	-2.489	0.1591	20	0.0006	14.4	0.0005
At1g13300(G2like)/col-At1g13300-DAP-Seq(GSE60143)/Homer	GAATCTWAGATTCYN	0.1	-2.489	0.1591	20	0.0006	14.5	0.0005
Unknown4/Drosophila-Promoters/Homer	AAAAATACCRMA	0.1	-2.481	0.1602	135	0.0043	118	0.0038
At1g77640(AP2EREBP)/col-At1g77640-DAP-Seq(GSE60143)/Homer	TGTCGGTGGA	0.1	-2.462	0.1628	676	0.0213	634.4	0.0202
HIF-1b(HLH)/T47D-HIF1b-ChIP-Seq(GSE59937)/Homer	RTACGTGC	0.1	-2.434	0.1671	4212	0.1327	4085.5	0.1302
NeuroD1(bHLH)/Islet-NeuroD1-ChIP-Seq(GSE30298)/Homer	GCCATCTGTT	0.1	-2.403	0.1722	2603	0.082	2510.5	0.08
Tgif1(Homeobox)/mES-Tgif1-ChIP-Seq(GSE55404)/Homer	YTGWCADY	0.1	-2.397	0.1727	8018	0.2527	7828.9	0.2494
At5g65130(AP2EREBP)/colamp-At5g65130-DAP-Seq(GSE60143)/Homer	CCRCCGACAWTN	0.1	-2.376	0.1761	1152	0.0363	1096.7	0.0349
SPL9(SBP)/colamp-SPL9-DAP-Seq(GSE60143)/Homer	BTGTACTT	0.1	-2.345	0.1814	5604	0.1766	5455.8	0.1738
At1g19000(MYBrelated)/colamp-At1g19000-DAP-Seq(GSE60143)/Homer	WWTGGATAADDT	0.1	-2.303	0.1887	1094	0.0345	1041.6	0.0332
DEAR5(AP2EREBP)/col-DEAR5-DAP-Seq(GSE60143)/Homer	NDWTGTCGGTGRWDN	1	-2.299	0.189	491	0.0155	458	0.0146
EFL-1(E2F)/cElegans-L1-EFL1-ChIP-Seq(modEncode)/Homer	TGCAARYGCGCTCYA	1	-2.292	0.1901	81	0.0026	69.5	0.0022
GATA(Zf),IR3/iTreg-Gata3-ChIP-Seq(GSE20898)/Homer	NNNNNBAGATAWYATCTVHN	1	-2.287	0.1906	187	0.0059	168.5	0.0054
AGL16(MADS)/col-AGL16-DAP-Seq(GSE60143)/Homer	TWCCHWATWDGGAAA	1	-2.244	0.1986	111	0.0035	97.2	0.0031
At1g72010(TCP)/colamp-At1g72010-DAP-Seq(GSE60143)/Homer	GGDCCCAC	1	-2.238	0.1994	2127	0.067	2049.4	0.0653
CRE(bZIP)/Promoter/Homer	CSGTGACGTCAC	1	-2.218	0.2032	975	0.0307	927.6	0.0296
caudal(Homeobox)/Drosophila-Embryos-ChIP-Chip(modEncode)/Homer	GGYCATAAAW	1	-2.206	0.2052	1157	0.0365	1104.2	0.0352
Phox2b(Homeobox)/CLBGA-PHOX2B-ChIP-Seq(GSE90683)/Homer	TTAATTNAATTA	1	-2.191	0.2078	147	0.0046	131.5	0.0042
Meis1(Homeobox)/MastCells-Meis1-ChIP-Seq(GSE48085)/Homer	VGCTGWCAVB	1	-2.177	0.2103	5332	0.168	5194.1	0.1655
PBX1(Homeobox)/MCF7-PBX1-ChIP-Seq(GSE28007)/Homer	GSCTGTCACTCA	1	-2.171	0.2113	285	0.009	262.1	0.0084
Foxh1(Forkhead)/hESC-FOXH1-ChIP-Seq(GSE29422)/Homer	NNTGTGGATTSS	1	-2.162	0.2128	1079	0.034	1029.6	0.0328
ZML1(C2C2gata)/colamp-ZML1-DAP-Seq(GSE60143)/Homer	ATCWYRACCGTTSRW	1	-2.152	0.2144	25	0.0008	19.3	0.0006
DDF1(AP2EREBP)/col-DDF1-DAP-Seq(GSE60143)/Homer	GCCGACAT	1	-2.135	0.2178	1207	0.038	1154.3	0.0368
CUC3(NAC)/col-CUC3-DAP-Seq(GSE60143)/Homer	TRCKTGWNNNACAMG	1	-2.119	0.2209	611	0.0193	576.1	0.0184
PR(NR)/T47D-PR-ChIP-Seq(GSE31130)/Homer	VAGRACAKNCTGTBC	1	-2.111	0.2221	6161	0.1942	6012.4	0.1916
HIC1(Zf)/Treg-ZBTB29-ChIP-Seq(GSE99889)/Homer	TGCCAGCB	1	-2.103	0.2235	8428	0.2656	8245.9	0.2627
RFX(HTH)/K562-RFX3-ChIP-Seq(SRA012198)/Homer	CGGTTGCCATGGCAAC	1	-2.093	0.2253	349	0.011	324.8	0.0103
At1g36060(AP2EREBP)/colamp-At1g36060-DAP-Seq(GSE60143)/Homer	NNWWKGTCGGTG	1	-2.088	0.2261	2258	0.0712	2181.4	0.0695
At3g09600(MYBrelated)/colamp-At3g09600-DAP-Seq(GSE60143)/Homer	AAAATATCTT	1	-2.08	0.2276	483	0.0152	453.9	0.0145
ANAC057(NAC)/colamp-ANAC057-DAP-Seq(GSE60143)/Homer	DVCKTGNNNNNCAMG	1	-2.069	0.2297	1619	0.051	1557.4	0.0496
VND4(NAC)/colamp-VND4-DAP-Seq(GSE60143)/Homer	WRCTTGWANWWCAAG	1	-2.062	0.2307	1420	0.0447	1363	0.0434
SPL13(SBP)/col-SPL13-DAP-Seq(GSE60143)/Homer	WAHTGTACGGAH	1	-2.035	0.2365	269	0.0085	248.5	0.0079
OBP4(C2C2dof)/col-OBP4-DAP-Seq(GSE60143)/Homer	WTTHACTTTTTB	1	-2.016	0.2408	2642	0.0833	2559.5	0.0815
SOL1(CPP)/colamp-SOL1-DAP-Seq(GSE60143)/Homer	ATTTAAATHN	1	-1.995	0.2454	2190	0.069	2117.1	0.0675
DAG2(C2C2dof)/col-DAG2-DAP-Seq(GSE60143)/Homer	WWTTHACTTTTT	1	-1.99	0.2461	2882	0.0908	2795.9	0.0891
CDF3(C2C2dof)/colamp-CDF3-DAP-Seq(GSE60143)/Homer	AAAAGTRM	1	-1.975	0.2494	3759	0.1185	3656.5	0.1165
Brachyury(T-box)/Mesoendoderm-Brachyury-ChIP-exo(GSE54963)/Homer	ANTTMRCASBNNNGTGYKAAN	1	-1.975	0.2494	552	0.0174	521.7	0.0166
At2g45680(TCP)/colamp-At2g45680-DAP-Seq(GSE60143)/Homer	GTGGGNCCCACNDND	1	-1.966	0.2507	217	0.0068	199.2	0.0063
AT1G19040(NAC)/col-AT1G19040-DAP-Seq(GSE60143)/Homer	CTTGNDNHNCAAGYW	1	-1.944	0.256	290	0.0091	269.8	0.0086
Oct4:Sox17(POU,Homeobox,HMG)/F9-Sox17-ChIP-Seq(GSE44553)/Homer	CCATTGTATGCAAAT	1	-1.93	0.2591	162	0.0051	147.2	0.0047
ZKSCAN1(Zf)/HepG2-ZKSCAN1-ChIP-Seq(Encode)/Homer	GCACAYAGTAGGKCY	1	-1.926	0.2597	78	0.0025	68.4	0.0022
ANAC094(NAC)/col-ANAC094-DAP-Seq(GSE60143)/Homer	DVCGTRNNNNNYACG	1	-1.921	0.2605	1598	0.0504	1540.4	0.0491
PIF4(bHLH)/Seedling-PIF4-ChIP-Seq(GSE35315)/Homer	NNBCACGTGN	1	-1.905	0.2641	3399	0.1071	3305.8	0.1053
RUNX-AML(Runt)/CD4+-PolII-ChIP-Seq(Barski_et_al.)/Homer	GCTGTGGTTW	1	-1.902	0.2645	1797	0.0566	1735.1	0.0553
AT2G33550(Trihelix)/colamp-AT2G33550-DAP-Seq(GSE60143)/Homer	TTTAAGGGCAYTTTT	1	-1.894	0.266	3810	0.1201	3710	0.1182
ANAC096(NAC)/colamp-ANAC096-DAP-Seq(GSE60143)/Homer	TACTTGWNNNWCAAG	1	-1.888	0.2672	1250	0.0394	1201.3	0.0383
TGA10(bZIP)/colamp-TGA10-DAP-Seq(GSE60143)/Homer	ATGACGTC	1	-1.88	0.2688	1424	0.0449	1372	0.0437
PABPC1(?)/MEL-PABC1-CLIP-Seq(GSE69755)/Homer	HAATAAAGNN	1	-1.841	0.2791	2765	0.0871	2686	0.0856
AT1G01250(AP2EREBP)/col-AT1G01250-DAP-Seq(GSE60143)/Homer	YCACCGACAHTW	1	-1.84	0.2791	243	0.0077	226	0.0072
At1g69690(TCP)/colamp-At1g69690-DAP-Seq(GSE60143)/Homer	NHGTGGGGCCCACHW	1	-1.813	0.2859	804	0.0253	768.8	0.0245
SeqBias: TA-repeat	TATATATATA	1	-1.807	0.287	3480	0.1097	3388.2	0.108
TCP1(TCP)/col-TCP1-DAP-Seq(GSE60143)/Homer	GGGGGCCCMMCN	1	-1.777	0.2954	1227	0.0387	1181.4	0.0376
ANAC058(NAC)/col-ANAC058-DAP-Seq(GSE60143)/Homer	TWCTTGTDNNACAAG	1	-1.767	0.2978	1111	0.035	1068.4	0.034
Rfx1(HTH)/NPC-H3K4me1-ChIP-Seq(GSE16256)/Homer	KGTTGCCATGGCAA	1	-1.762	0.2987	657	0.0207	626.1	0.0199
ERF115(AP2EREBP)/colamp-ERF115-DAP-Seq(GSE60143)/Homer	WTKRCGGCGB	1	-1.75	0.3017	8316	0.2621	8152.4	0.2597
HSFB4(HSF)/col-HSFB4-DAP-Seq(GSE60143)/Homer	TTCTAGAAGCTTCTA	1	-1.749	0.3017	62	0.002	54.6	0.0017
HSF3(HSF)/colamp-HSF3-DAP-Seq(GSE60143)/Homer	NTTCTAGAAKCTTCT	1	-1.735	0.3054	1866	0.0588	1807.4	0.0576
CUC2(NAC)/colamp-CUC2-DAP-Seq(GSE60143)/Homer	TRCKTGTNNNWCAMG	1	-1.729	0.3065	641	0.0202	611.1	0.0195
TCP17(TCP)/col-TCP17-DAP-Seq(GSE60143)/Homer	GTGGTCCCCA	1	-1.72	0.3089	199	0.0063	184.1	0.0059
SPL11(SBP)/col100-SPL11-DAP-Seq(GSE60143)/Homer	YTGTACTTBH	1	-1.698	0.3152	1175	0.037	1132.7	0.0361
SeqBias: CG-repeat	CGCGCGCGCG	1	-1.695	0.3156	11867	0.374	11660.9	0.3715
NRF1(NRF)/MCF7-NRF1-ChIP-Seq(Unpublished)/Homer	CTGCGCATGCGC	1	-1.69	0.3166	1140	0.0359	1098.8	0.035
At5g18450(AP2EREBP)/col-At5g18450-DAP-Seq(GSE60143)/Homer	CACCGCTT	1	-1.685	0.3176	8058	0.2539	7901.6	0.2517
Oct2(POU,Homeobox)/Bcell-Oct2-ChIP-Seq(GSE21512)/Homer	ATATGCAAAT	1	-1.675	0.3201	343	0.0108	323.3	0.0103
bHLH80(bHLH)/col-bHLH80-DAP-Seq(GSE60143)/Homer	NNNNDCAASTTGHNN	1	-1.664	0.3232	2327	0.0733	2261.7	0.0721
AT3G12130(C3H)/colamp-AT3G12130-DAP-Seq(GSE60143)/Homer	TMACTTTTTV	1	-1.66	0.3238	5640	0.1777	5519.4	0.1758
bZIP42(bZIP)/colamp-bZIP42-DAP-Seq(GSE60143)/Homer	GCCACGTCAGCA	1	-1.648	0.3271	19	0.0006	15.1	0.0005
ZNF143|STAF(Zf)/CUTLL-ZNF143-ChIP-Seq(GSE29600)/Homer	ATTTCCCAGVAKSCY	1	-1.626	0.334	1294	0.0408	1250.3	0.0398
HRE(HSF)/HepG2-HSF1-ChIP-Seq(GSE31477)/Homer	BSTTCTRGAABVTTCYAGAA	1	-1.625	0.334	393	0.0124	372.8	0.0119
Tbx5(T-box)/HL1-Tbx5.biotin-ChIP-Seq(GSE21529)/Homer	AGGTGTCA	1	-1.623	0.334	10050	0.3167	9870.5	0.3145
Sox4(HMG)/proB-Sox4-ChIP-Seq(GSE50066)/Homer	YCTTTGTTCC	1	-1.615	0.3359	1989	0.0627	1931.5	0.0615
MS188(MYB)/colamp-MS188-DAP-Seq(GSE60143)/Homer	WARKTAGGTRRA	1	-1.605	0.3388	1272	0.0401	1229.3	0.0392
ZSCAN22(Zf)/HEK293-ZSCAN22.GFP-ChIP-Seq(GSE58341)/Homer	SMCAGTCWGAKGGAGGAGGC	1	-1.58	0.3466	289	0.0091	272.7	0.0087
Phox2a(Homeobox)/Neuron-Phox2a-ChIP-Seq(GSE31456)/Homer	YTAATYNRATTA	1	-1.558	0.3539	327	0.0103	309.7	0.0099
CRC(C2C2YABBY)/col-CRC-DAP-Seq(GSE60143)/Homer	TWATSATA	1	-1.552	0.3554	1381	0.0435	1337.9	0.0426
Smad3(MAD)/NPC-Smad3-ChIP-Seq(GSE36673)/Homer	TWGTCTGV	1	-1.53	0.3627	9620	0.3032	9451.1	0.3011
bHLH10(bHLH)/colamp-bHLH10-DAP-Seq(GSE60143)/Homer	YACCGACA	1	-1.525	0.3636	823	0.0259	792.4	0.0252
Myf5(bHLH)/GM-Myf5-ChIP-Seq(GSE24852)/Homer	BAACAGCTGT	1	-1.523	0.3639	2417	0.0762	2354.3	0.075
Lhx1(Homeobox)/EmbryoCarcinoma-Lhx1-ChIP-Seq(GSE70957)/Homer	NNYTAATTAR	1	-1.517	0.3652	1624	0.0512	1576.5	0.0502
CEJ1(AP2EREBP)/col-CEJ1-DAP-Seq(GSE60143)/Homer	WWTGTCGGTG	1	-1.516	0.3652	3367	0.1061	3288.4	0.1048
ANAC020(NAC)/col-ANAC020-DAP-Seq(GSE60143)/Homer	DVCKTGHNNNDCAAG	1	-1.511	0.3662	1287	0.0406	1246.3	0.0397
WIP5(C2H2)/colamp-WIP5-DAP-Seq(GSE60143)/Homer	TDTTCTCMAGGT	1	-1.511	0.3662	3564	0.1123	3482.9	0.111
MYB27(MYB)/colamp-MYB27-DAP-Seq(GSE60143)/Homer	TACCTAACWT	1	-1.504	0.3678	228	0.0072	214.8	0.0068
BIM1(bHLH)/colamp-BIM1-DAP-Seq(GSE60143)/Homer	NNNNNNVTCACGTGM	1	-1.487	0.3731	424	0.0134	404.1	0.0129
RVE1(MYBrelated)/col-RVE1-DAP-Seq(GSE60143)/Homer	AAATATCT	1	-1.482	0.3745	613	0.0193	588.9	0.0188
ANAC028(NAC)/col-ANAC028-DAP-Seq(GSE60143)/Homer	WRCTTGNNNNNCAAG	1	-1.481	0.3745	1423	0.0448	1380	0.044
AIL7(AP2EREBP)/colamp-AIL7-DAP-Seq(GSE60143)/Homer	KCACRAWTYYCGAGG	1	-1.475	0.3759	1284	0.0405	1244.9	0.0397
X-box(HTH)/NPC-H3K4me1-ChIP-Seq(GSE16256)/Homer	GGTTGCCATGGCAA	1	-1.468	0.3781	300	0.0095	284.7	0.0091
bHLH122(bHLH)/col100-bHLH122-DAP-Seq(GSE60143)/Homer	NDDCAASTTGHHNWW	1	-1.457	0.3814	1984	0.0625	1931.9	0.0616
PRDM14(Zf)/H1-PRDM14-ChIP-Seq(GSE22767)/Homer	RGGTCTCTAACY	1	-1.446	0.3849	851	0.0268	821.3	0.0262
JGL(C2H2)/col-JGL-DAP-Seq(GSE60143)/Homer	ACYTTCAGTT	1	-1.446	0.3849	3608	0.1137	3528.5	0.1124
STZ(C2H2)/colamp-STZ-DAP-Seq(GSE60143)/Homer	HNBTCACT	1	-1.444	0.3849	16567	0.5221	16322.6	0.52
PHV(HB)/col-PHV-DAP-Seq(GSE60143)/Homer	RTAATSATTA	1	-1.441	0.3849	449	0.0141	429.6	0.0137
E2F6(E2F)/Hela-E2F6-ChIP-Seq(GSE31477)/Homer	GGCGGGAARN	1	-1.434	0.3872	3141	0.099	3069.3	0.0978
MYB62(MYB)/colamp-MYB62-DAP-Seq(GSE60143)/Homer	NTACCTAACT	1	-1.43	0.3881	3462	0.1091	3385.9	0.1079
ANAC013(NAC)/col-ANAC013-DAP-Seq(GSE60143)/Homer	CTTGNNNNNCAAGNA	1	-1.415	0.3932	927	0.0292	896.9	0.0286
STAT6(Stat)/CD4-Stat6-ChIP-Seq(GSE22104)/Homer	ABTTCYYRRGAA	1	-1.413	0.3932	975	0.0307	943.4	0.0301
ANAC053(NAC)/colamp-ANAC053-DAP-Seq(GSE60143)/Homer	TDCTTGNNNNNCAAG	1	-1.405	0.3956	1127	0.0355	1093	0.0348
bHLH130(bHLH)/col-bHLH130-DAP-Seq(GSE60143)/Homer	GCAACTTG	1	-1.402	0.3964	1698	0.0535	1652.1	0.0526
Tal1	CATCTG	1	-1.398	0.3972	3676	0.1158	3597.6	0.1146
Hoxb4(Homeobox)/ES-Hoxb4-ChIP-Seq(GSE34014)/Homer	TGATTRATGGCY	1	-1.396	0.3976	331	0.0104	315.2	0.01
At5g22890(C2H2)/col-At5g22890-DAP-Seq(GSE60143)/Homer	NSAGGTKWTATCTGD	1	-1.38	0.4033	61	0.0019	55.7	0.0018
AT1G71450(AP2EREBP)/col-AT1G71450-DAP-Seq(GSE60143)/Homer	DHDWTGTCGGTG	1	-1.377	0.4038	6808	0.2145	6685.1	0.213
SeqBias: polyC-repeat	CCCCCCCCCC	1	-1.37	0.4058	31721	0.9996	31372	0.9995
GATA3(Zf),DR4/iTreg-Gata3-ChIP-Seq(GSE20898)/Homer	AGATGKDGAGATAAG	1	-1.362	0.4084	106	0.0033	98.7	0.0031
Tbx21(T-box)/GM12878-TBX21-ChIP-Seq(Encode)/Homer	AGGTGTGAAA	1	-1.361	0.4084	2108	0.0664	2056.5	0.0655
TGA3(bZIP)/colamp-TGA3-DAP-Seq(GSE60143)/Homer	WTGATGACGTCATCW	1	-1.353	0.411	218	0.0069	206.8	0.0066
AGL13(MADS)/col-AGL13-DAP-Seq(GSE60143)/Homer	TWCCAWWTWTGGWAA	1	-1.351	0.411	30	0.0009	26.3	0.0008
p73(p53)/Trachea-p73-ChIP-Seq(PRJNA310161)/Homer	NRRRCAWGTCCDGRCATGYY	1	-1.347	0.412	134	0.0042	125.4	0.004
DEAR2(AP2EREBP)/colamp-DEAR2-DAP-Seq(GSE60143)/Homer	HCACCGACAWHD	1	-1.34	0.4142	3847	0.1212	3768.4	0.1201
AT2G20110(CPP)/colamp-AT2G20110-DAP-Seq(GSE60143)/Homer	ATTYAAATHY	1	-1.336	0.4151	2159	0.068	2108	0.0672
ANAC087(NAC)/col-ANAC087-DAP-Seq(GSE60143)/Homer	WVCKTGHNNNWCAMG	1	-1.317	0.4223	616	0.0194	594.9	0.019
AT4G12670(MYBrelated)/col-AT4G12670-DAP-Seq(GSE60143)/Homer	AGGGTTTAGGGTTTA	1	-1.316	0.4224	2	0.0001	1	0
Sox2(HMG)/mES-Sox2-ChIP-Seq(GSE11431)/Homer	BCCATTGTTC	1	-1.295	0.4305	1950	0.0615	1903.8	0.0607
ARE(NR)/LNCAP-AR-ChIP-Seq(GSE27824)/Homer	RGRACASNSTGTYCYB	1	-1.274	0.4388	795	0.0251	770.3	0.0245
Unknown2/Drosophila-Promoters/Homer	CATCMCTA	1	-1.252	0.4481	3995	0.1259	3918.8	0.1249
FHY3(FAR1)/Arabidopsis-FHY3-ChIP-Seq(GSE30711)/Homer	HHCACGCGCBTN	1	-1.225	0.4596	1679	0.0529	1639	0.0522
JunD(bZIP)/K562-JunD-ChIP-Seq/Homer	ATGACGTCATCN	1	-1.222	0.4602	311	0.0098	299	0.0095
TGA9(bZIP)/colamp-TGA9-DAP-Seq(GSE60143)/Homer	VTGACGTC	1	-1.211	0.4642	2772	0.0874	2715.9	0.0865
Sox10(HMG)/SciaticNerve-Sox3-ChIP-Seq(GSE35132)/Homer	CCWTTGTYYB	1	-1.193	0.4722	3849	0.1213	3777.1	0.1203
ATHB15(HB)/col-ATHB15-DAP-Seq(GSE60143)/Homer	GYAATSATTA	1	-1.193	0.4722	369	0.0116	355.5	0.0113
ARF16(ARF)/col-ARF16-DAP-Seq(GSE60143)/Homer	ATTTTACGAT	1	-1.181	0.4762	219	0.0069	209.7	0.0067
ZNF136(Zf)/HEK293-ZNF136.GFP-ChIP-Seq(GSE58341)/Homer	YTKGATAHAGTATTCTWGGTNGGCA	1	-1.177	0.4776	121	0.0038	114.2	0.0036
AT1G44830(AP2EREBP)/col-AT1G44830-DAP-Seq(GSE60143)/Homer	NCCACCGACA	1	-1.175	0.4777	1191	0.0375	1161.8	0.037
SFP1/SacCer-Promoters/Homer	DDAAAAATTTTY	1	-1.151	0.4885	71	0.0022	66.5	0.0021
At2g33710(AP2EREBP)/colamp-At2g33710-DAP-Seq(GSE60143)/Homer	WTKGCGGCKR	1	-1.141	0.4925	8994	0.2834	8858.3	0.2822
TCP20(TCP)/col-TCP20-DAP-Seq(GSE60143)/Homer	GGDCCCAC	1	-1.141	0.4925	1548	0.0488	1513.1	0.0482
MYB113(MYB)/col-MYB113-DAP-Seq(GSE60143)/Homer	HNDAWTCMGTTAYWN	1	-1.139	0.4925	699	0.022	679.4	0.0216
AT5G63260(C3H)/col-AT5G63260-DAP-Seq(GSE60143)/Homer	RAAAAAGTRA	1	-1.128	0.4966	5121	0.1614	5035.1	0.1604
ANAC070(NAC)/colamp-ANAC070-DAP-Seq(GSE60143)/Homer	CTTRHDNHNBAAGHW	1	-1.116	0.502	2047	0.0645	2005.9	0.0639
Oct4(POU,Homeobox)/mES-Oct4-ChIP-Seq(GSE11431)/Homer	ATTTGCATAW	1	-1.098	0.5103	592	0.0187	575.5	0.0183
Cdx2(Homeobox)/mES-Cdx2-ChIP-Seq(GSE14586)/Homer	GYMATAAAAH	1	-1.093	0.512	868	0.0274	846.5	0.027
ANAC092(NAC)/colamp-ANAC092-DAP-Seq(GSE60143)/Homer	WRCKTGWNNNWCAMG	1	-1.085	0.5155	824	0.026	803	0.0256
DPL-1(E2F)/cElegans-Adult-ChIP-Seq(modEncode)/Homer	TAGCGCGC	1	-1.08	0.517	4804	0.1514	4725.9	0.1506
OCT:OCT(POU,Homeobox,IR1)/NPC-Brn2-ChIP-Seq(GSE35496)/Homer	ATGAATWATTCATGA	1	-1.08	0.517	15	0.0005	13.4	0.0004
Srebp1a(bHLH)/HepG2-Srebp1a-ChIP-Seq(GSE31477)/Homer	RTCACSCCAY	1	-1.077	0.5172	564	0.0178	548.3	0.0175
TCX2(CPP)/colamp-TCX2-DAP-Seq(GSE60143)/Homer	NNWWTTYRAAHN	1	-1.066	0.5218	2316	0.073	2272.5	0.0724
At4g32800(AP2EREBP)/colamp-At4g32800-DAP-Seq(GSE60143)/Homer	DYCACCGACAHWWWH	1	-1.066	0.5218	283	0.0089	273.1	0.0087
At5g52660(MYBrelated)/colamp-At5g52660-DAP-Seq(GSE60143)/Homer	HAAAAATATCTW	1	-1.063	0.522	476	0.015	462.7	0.0147
AT1G10720(BSD)/col-AT1G10720-DAP-Seq(GSE60143)/Homer	TTCTAGAAKCTTCTA	1	-1.062	0.522	61	0.0019	58	0.0018
CUC1(NAC)/col-CUC1-DAP-Seq(GSE60143)/Homer	TACTTGTNNNACAAG	1	-1.062	0.522	858	0.027	837.3	0.0267
AT4G27900(C2C2COlike)/col-AT4G27900-DAP-Seq(GSE60143)/Homer	TCTCVACCGTTSATT	1	-1.061	0.522	16	0.0005	14.1	0.0005
AT1G20910(ARID)/col-AT1G20910-DAP-Seq(GSE60143)/Homer	THAATTRAWN	1	-1.059	0.522	2065	0.0651	2025.5	0.0645
KLF6(Zf)/PDAC-KLF6-ChIP-Seq(GSE64557)/Homer	MKGGGYGTGGCC	1	-1.053	0.523	6335	0.1996	6238.6	0.1988
RAV1(RAV)/colamp-RAV1-DAP-Seq(GSE60143)/Homer	TWWTTTCTGTTG	1	-1.018	0.5407	1177	0.0371	1152.8	0.0367
CBF3(AP2EREBP)/colamp-CBF3-DAP-Seq(GSE60143)/Homer	YNRCCGACATNN	1	-1.016	0.5413	1507	0.0475	1477.6	0.0471
Ik-1	NHTTGGGAATRCC	1	-1.011	0.543	31733	1	31386.9	1
ZNF189(Zf)/HEK293-ZNF189.GFP-ChIP-Seq(GSE58341)/Homer	TGGAACAGMA	1	-1.011	0.543	2631	0.0829	2585.9	0.0824
Zfp809(Zf)/ES-Zfp809-ChIP-Seq(GSE70799)/Homer	GGGGCTYGKCTGGGA	1	-0.9839	0.5562	991	0.0312	970.6	0.0309
Brn2(POU,Homeobox)/NPC-Brn2-ChIP-Seq(GSE35496)/Homer	ATGAATATTC	1	-0.9798	0.5576	81	0.0026	77.8	0.0025
SND3(NAC)/col-SND3-DAP-Seq(GSE60143)/Homer	CTTNHNNNDNAAGNH	1	-0.9783	0.5576	1396	0.044	1369.2	0.0436
c-Myc(bHLH)/mES-cMyc-ChIP-Seq(GSE11431)/Homer	VVCCACGTGG	1	-0.9685	0.5623	1626	0.0512	1596.5	0.0509
RAP21(AP2EREBP)/colamp-RAP21-DAP-Seq(GSE60143)/Homer	BCACCGACAHNN	1	-0.9595	0.5665	483	0.0152	471.2	0.015
LHY(Myb)/Seedling-LHY-ChIP-Seq(GSE52175)/Homer	ADAAATATCT	1	-0.9548	0.5683	1249	0.0394	1225.5	0.039
STOP1(C2H2)/colamp-STOP1-DAP-Seq(GSE60143)/Homer	DTATCTGGKGRAGGT	1	-0.942	0.5748	1211	0.0382	1188.9	0.0379
ZIM(C2C2gata)/col-ZIM-DAP-Seq(GSE60143)/Homer	ATCSRACGGTYRAGA	1	-0.9369	0.5768	27	0.0009	25.3	0.0008
ZNF415(Zf)/HEK293-ZNF415.GFP-ChIP-Seq(GSE58341)/Homer	GRTGMTRGAGCC	1	-0.9304	0.5797	2172	0.0684	2136.4	0.0681
Pknox1(Homeobox)/ES-Prep1-ChIP-Seq(GSE63282)/Homer	SCTGTCAVTCAV	1	-0.9161	0.5872	731	0.023	716.3	0.0228
LIN-39(Homeobox)/cElegans.L3-LIN39-ChIP-Seq(modEncode)/Homer	ATGATTRATG	1	-0.9005	0.5955	1530	0.0482	1504.3	0.0479
Sox3(HMG)/NPC-Sox3-ChIP-Seq(GSE33059)/Homer	CCWTTGTY	1	-0.8935	0.5988	3958	0.1247	3901.7	0.1243
WUS1(Homeobox)/colamp-WUS1-DAP-Seq(GSE60143)/Homer	CAWTCATTCA	1	-0.887	0.6018	651	0.0205	638.4	0.0203
MYB121(MYB)/col-MYB121-DAP-Seq(GSE60143)/Homer	YNTACCTAACWW	1	-0.8472	0.6253	586	0.0185	575.8	0.0183
IBL1(bHLH)/Seedling-IBL1-ChIP-Seq(GSE51120)/Homer	CACGTGCC	1	-0.8423	0.6275	7632	0.2405	7535.7	0.2401
DUX4(Homeobox)/Myoblasts-DUX4.V5-ChIP-Seq(GSE75791)/Homer	NWTAAYCYAATCAWN	1	-0.8407	0.6275	47	0.0015	46	0.0015
AT4G00250(GeBP)/col-AT4G00250-DAP-Seq(GSE60143)/Homer	WDTGGATAAKRT	1	-0.8253	0.6363	772	0.0243	759	0.0242
AT2G28920(ND)/col-AT2G28920-DAP-Seq(GSE60143)/Homer	WAGATATTTWTW	1	-0.7984	0.6527	249	0.0078	244.1	0.0078
NUC(C2H2)/col-NUC-DAP-Seq(GSE60143)/Homer	HAVAAAACGACAAAA	1	-0.7885	0.6582	128	0.004	125.5	0.004
Sox9(HMG)/Limb-SOX9-ChIP-Seq(GSE73225)/Homer	AGGVNCCTTTGT	1	-0.7846	0.6598	2090	0.0659	2062.7	0.0657
bZIP18(bZIP)/colamp-bZIP18-DAP-Seq(GSE60143)/Homer	KGMCAGCTND	1	-0.7788	0.6626	18705	0.5894	18491.5	0.5891
CBF2(AP2EREBP)/colamp-CBF2-DAP-Seq(GSE60143)/Homer	YBRCCGACATNNNNN	1	-0.7776	0.6626	1455	0.0459	1435.7	0.0457
IRF:BATF(IRF:bZIP)/pDC-Irf8-ChIP-Seq(GSE66899)/Homer	CTTTCANTATGACTV	1	-0.7766	0.6626	138	0.0043	135.8	0.0043
AtIDD11(C2H2)/colamp-AtIDD11-DAP-Seq(GSE60143)/Homer	TTTGTCGTTT	1	-0.7744	0.6626	659	0.0208	649.7	0.0207
ZNF16(Zf)/HEK293-ZNF16.GFP-ChIP-Seq(GSE58341)/Homer	MACCTTCYATGGCTCCCTAKTGCCY	1	-0.7637	0.6687	24	0.0008	23.8	0.0008
ZNF7(Zf)/HepG2-ZNF7.Flag-ChIP-Seq(Encode)/Homer	CTGCCWVCTTTTRTA	1	-0.7637	0.6687	1090	0.0343	1075.6	0.0343
Max(bHLH)/K562-Max-ChIP-Seq(GSE31477)/Homer	RCCACGTGGYYN	1	-0.7624	0.6687	2101	0.0662	2074.9	0.0661
TGA5(bZIP)/col-TGA5-DAP-Seq(GSE60143)/Homer	NNGATGACGTCATCN	1	-0.7564	0.6707	306	0.0096	301.8	0.0096
HOXA9(Homeobox)/HSC-Hoxa9-ChIP-Seq(GSE33509)/Homer	GGCCATAAATCA	1	-0.7454	0.6771	980	0.0309	967.3	0.0308
SPL1(SBP)/colamp-SPL1-DAP-Seq(GSE60143)/Homer	HYGTACDTWH	1	-0.7399	0.6798	3694	0.1164	3650.1	0.1163
CBF1(AP2EREBP)/colamp-CBF1-DAP-Seq(GSE60143)/Homer	YRCCGACATN	1	-0.7241	0.6897	2278	0.0718	2251.3	0.0717
AT3G16280(AP2EREBP)/colamp-AT3G16280-DAP-Seq(GSE60143)/Homer	HCACCGACAHHDHHN	1	-0.7185	0.6926	979	0.0309	967.8	0.0308
RAP26(AP2EREBP)/colamp-RAP26-DAP-Seq(GSE60143)/Homer	HDATGGCGGCGG	1	-0.6949	0.7081	6534	0.2059	6462.7	0.2059
ANAC011(NAC)/col-ANAC011-DAP-Seq(GSE60143)/Homer	TDCTTGYRNNDCAAG	1	-0.6934	0.7081	700	0.0221	692.5	0.0221
Hoxa11(Homeobox)/ChickenMSG-Hoxa11.Flag-ChIP-Seq(GSE86088)/Homer	TTTTATGGCM	1	-0.6882	0.7108	4115	0.1297	4070.6	0.1297
Pit1+1bp(Homeobox)/GCrat-Pit1-ChIP-Seq(GSE58009)/Homer	ATGCATAATTCA	1	-0.669	0.7235	291	0.0092	288.4	0.0092
AT1G47655(C2C2dof)/colamp-AT1G47655-DAP-Seq(GSE60143)/Homer	YHACTTTTTS	1	-0.6638	0.7262	8089	0.2549	8003.7	0.255
OBP3(C2C2dof)/col-OBP3-DAP-Seq(GSE60143)/Homer	NYWACTTTTT	1	-0.6592	0.7285	6742	0.2125	6671.4	0.2126
AT3G10030(Trihelix)/colamp-AT3G10030-DAP-Seq(GSE60143)/Homer	GCCGTTAA	1	-0.6555	0.7302	1215	0.0383	1203.3	0.0383
HDG1(Homeobox)/col100-HDG1-DAP-Seq(GSE60143)/Homer	DDYAATTAATGH	1	-0.6537	0.7304	531	0.0167	526.5	0.0168
TGA4(bZIP)/colamp-TGA4-DAP-Seq(GSE60143)/Homer	RTGACGTCAKCW	1	-0.6481	0.7335	751	0.0237	744.8	0.0237
GATA4(C2C2gata)/col-GATA4-DAP-Seq(GSE60143)/Homer	DDWTYAGATCTR	1	-0.6405	0.738	1676	0.0528	1660.4	0.0529
MafB(bZIP)/BMM-Mafb-ChIP-Seq(GSE75722)/Homer	WNTGCTGASTCAGCANWTTY	1	-0.6379	0.7389	992	0.0313	983.5	0.0313
TSO1(CPP)/col-TSO1-DAP-Seq(GSE60143)/Homer	RAATTTRAAW	1	-0.634	0.7407	144	0.0045	143.9	0.0046
DEAR3(AP2EREBP)/colamp-DEAR3-DAP-Seq(GSE60143)/Homer	BCACCGACAWNNNNN	1	-0.63	0.7426	922	0.0291	914.3	0.0291
CEBP:CEBP(bZIP)/MEF-Chop-ChIP-Seq(GSE35681)/Homer	NTNATGCAAYMNNHTGMAAY	1	-0.62	0.749	175	0.0055	174.6	0.0056
AT3G10580(MYBrelated)/colamp-AT3G10580-DAP-Seq(GSE60143)/Homer	TACCTAACWNHW	1	-0.6176	0.7497	761	0.024	756	0.0241
MafF(bZIP)/HepG2-MafF-ChIP-Seq(GSE31477)/Homer	HWWGTCAGCAWWTTT	1	-0.6024	0.7601	355	0.0112	353.2	0.0113
EBNA1(EBV-virus)/Raji-EBNA1-ChIP-Seq(GSE30709)/Homer	GGYAGCAYDTGCTDCCCNNN	1	-0.5996	0.7611	43	0.0014	43.9	0.0014
PLT1(AP2EREBP)/colamp-PLT1-DAP-Seq(GSE60143)/Homer	GCACGAWTYCCGAGG	1	-0.5992	0.7611	231	0.0073	230	0.0073
SeqBias: GA-repeat	GAGAGAGAGA	1	-0.5913	0.7653	20915	0.6591	20697.6	0.6594
ABR1(AP2EREBP)/colamp-ABR1-DAP-Seq(GSE60143)/Homer	AAATGGCGGCGG	1	-0.5874	0.7672	5093	0.1605	5046.6	0.1608
ABF1/SacCer-Promoters/Homer	CGTRNAAARTGA	1	-0.579	0.7726	694	0.0219	690.6	0.022
NFAT(RHD)/Jurkat-NFATC1-ChIP-Seq(Jolma_et_al.)/Homer	ATTTTCCATT	1	-0.5756	0.7741	1732	0.0546	1719.7	0.0548
GAGA-repeat/SacCer-Promoters/Homer	CTYTCTYTCTCTCTC	1	-0.5733	0.7749	11348	0.3576	11237.1	0.358
KLF3(Zf)/MEF-Klf3-ChIP-Seq(GSE44748)/Homer	NRGCCCCRCCCHBNN	1	-0.5683	0.7776	3460	0.109	3432	0.1093
ANAC005(NAC)/col-ANAC005-DAP-Seq(GSE60143)/Homer	WVCTTVTWNHABAAG	1	-0.5643	0.7796	887	0.028	882.3	0.0281
EKLF(Zf)/Erythrocyte-Klf1-ChIP-Seq(GSE20478)/Homer	NWGGGTGTGGCY	1	-0.5621	0.7802	774	0.0244	770.3	0.0245
SCL(bHLH)/HPC7-Scl-ChIP-Seq(GSE13511)/Homer	AVCAGCTG	1	-0.5593	0.7814	15309	0.4824	15157.1	0.4829
MafK(bZIP)/C2C12-MafK-ChIP-Seq(GSE36030)/Homer	GCTGASTCAGCA	1	-0.5492	0.7882	710	0.0224	707.6	0.0225
Pbx3(Homeobox)/GM12878-PBX3-ChIP-Seq(GSE32465)/Homer	SCTGTCAMTCAN	1	-0.5446	0.7907	734	0.0231	731.8	0.0233
AT5G22990(C2H2)/col-AT5G22990-DAP-Seq(GSE60143)/Homer	WCGAHDTCGWHN	1	-0.5426	0.7912	279	0.0088	279.2	0.0089
Rfx2(HTH)/LoVo-RFX2-ChIP-Seq(GSE49402)/Homer	GTTGCCATGGCAACM	1	-0.5296	0.8004	347	0.0109	347.6	0.0111
SND2(NAC)/colamp-SND2-DAP-Seq(GSE60143)/Homer	CTTVWNNNWBAAGNW	1	-0.5206	0.8066	1143	0.036	1138.9	0.0363
At4g28140(AP2EREBP)/colamp-At4g28140-DAP-Seq(GSE60143)/Homer	DCCACCGACCAW	1	-0.5167	0.8086	1169	0.0368	1164.7	0.0371
SPL15(SBP)/colamp-SPL15-DAP-Seq(GSE60143)/Homer	WDWMMGTACADW	1	-0.5074	0.815	3021	0.0952	3001.6	0.0956
ANAC004(NAC)/colamp-ANAC004-DAP-Seq(GSE60143)/Homer	WNCTTVYNNNRBAAG	1	-0.5053	0.8156	669	0.0211	668.2	0.0213
MyoG(bHLH)/C2C12-MyoG-ChIP-Seq(GSE36024)/Homer	AACAGCTG	1	-0.4938	0.8238	3922	0.1236	3895.5	0.1241
NAC2(NAC)/colamp-NAC2-DAP-Seq(GSE60143)/Homer	TDCTTGNNNNNCAAG	1	-0.4928	0.8238	1341	0.0423	1336.6	0.0426
IDD7(C2H2)/col-IDD7-DAP-Seq(GSE60143)/Homer	TTTGTCKTTTTN	1	-0.4898	0.8248	600	0.0189	600.1	0.0191
At4g01280(MYBrelated)/colamp-At4g01280-DAP-Seq(GSE60143)/Homer	AAATATCT	1	-0.4896	0.8248	602	0.019	602.1	0.0192
Hoxd13(Homeobox)/ChickenMSG-Hoxd13.Flag-ChIP-Seq(GSE86088)/Homer	NCYAATAAAA	1	-0.4888	0.8248	2500	0.0788	2486.5	0.0792
GRHL2(CP2)/HBE-GRHL2-ChIP-Seq(GSE46194)/Homer	AAACYKGTTWDACMRGTTTB	1	-0.487	0.8248	796	0.0251	795.5	0.0253
AT3G10113(MYBrelated)/col-AT3G10113-DAP-Seq(GSE60143)/Homer	WNAAATATCWWN	1	-0.4812	0.8275	457	0.0144	458.6	0.0146
AS2(LOBAS2)/col-AS2-DAP-Seq(GSE60143)/Homer	CCGDAAWWHMCGSCG	1	-0.4802	0.8275	465	0.0147	466.5	0.0149
AT5G23930(mTERF)/col-AT5G23930-DAP-Seq(GSE60143)/Homer	GGCGGCTG	1	-0.4688	0.8355	9655	0.3043	9575.9	0.3051
CBF4(AP2EREBP)/colamp-CBF4-DAP-Seq(GSE60143)/Homer	NRCCGACDWNNNNNN	1	-0.4687	0.8355	2197	0.0692	2187.5	0.0697
Sox17(HMG)/Endoderm-Sox17-ChIP-Seq(GSE61475)/Homer	CCATTGTTYB	1	-0.465	0.8364	1430	0.0451	1426.3	0.0454
TINY(AP2EREBP)/col-TINY-DAP-Seq(GSE60143)/Homer	NNCACCGACA	1	-0.4508	0.8472	726	0.0229	727.2	0.0232
GATA12(C2C2gata)/col-GATA12-DAP-Seq(GSE60143)/Homer	YAGATCTRAW	1	-0.438	0.8569	1380	0.0435	1378.4	0.0439
COG1(C2C2dof)/col-COG1-DAP-Seq(GSE60143)/Homer	DAAAAAGTGA	1	-0.435	0.8583	2919	0.092	2906.5	0.0926
AT5G66940(C2C2dof)/col-AT5G66940-DAP-Seq(GSE60143)/Homer	NNHACTTTWT	1	-0.4179	0.8719	3856	0.1215	3837.7	0.1223
Tbx20(T-box)/Heart-Tbx20-ChIP-Seq(GSE29636)/Homer	GGTGYTGACAGS	1	-0.4162	0.8722	607	0.0191	610.2	0.0194
n-Myc(bHLH)/mES-nMyc-ChIP-Seq(GSE11431)/Homer	VRCCACGTGG	1	-0.4103	0.8762	2414	0.0761	2407.1	0.0767
FOXA1:AR(Forkhead,NR)/LNCAP-AR-ChIP-Seq(GSE27824)/Homer	AGTAAACAAAAAAGAACAND	1	-0.41	0.8762	123	0.0039	126.6	0.004
IDD5(C2H2)/colamp-IDD5-DAP-Seq(GSE60143)/Homer	TTTTGTCTTTTTBTK	1	-0.4064	0.8773	1386	0.0437	1386.6	0.0442
Bcl6(Zf)/Liver-Bcl6-ChIP-Seq(GSE31578)/Homer	NNNCTTTCCAGGAAA	1	-0.4054	0.8773	3648	0.115	3632.1	0.1157
ANAC017(NAC)/colamp-ANAC017-DAP-Seq(GSE60143)/Homer	TMCTTGNNNNNCAAG	1	-0.3988	0.8816	301	0.0095	305	0.0097
ERF13(AP2EREBP)/colamp-ERF13-DAP-Seq(GSE60143)/Homer	TYAGCCGCCATT	1	-0.3985	0.8816	5848	0.1843	5814	0.1852
AT5G02460(C2C2dof)/col-AT5G02460-DAP-Seq(GSE60143)/Homer	CHCCTTTT	1	-0.3961	0.8816	4854	0.153	4829.8	0.1539
p53(p53)/Saos-p53-ChIP-Seq(GSE15780)/Homer	RRCATGYCYRGRCATGYYYN	1	-0.3912	0.8835	218	0.0069	222.2	0.0071
p53(p53)/Saos-p53-ChIP-Seq/Homer	RRCATGYCYRGRCATGYYYN	1	-0.3912	0.8835	218	0.0069	222.2	0.0071
DDF2(AP2EREBP)/col-DDF2-DAP-Seq(GSE60143)/Homer	GATGTCGRCR	1	-0.3867	0.8863	82	0.0026	85.6	0.0027
MYB40(MYB)/col-MYB40-DAP-Seq(GSE60143)/Homer	TGGTAGGTRARA	1	-0.3864	0.8863	753	0.0237	757.6	0.0241
CRX(Homeobox)/Retina-Crx-ChIP-Seq(GSE20012)/Homer	GCTAATCC	1	-0.3851	0.8863	5474	0.1725	5445.3	0.1735
GATA14(C2C2gata)/col-GATA14-DAP-Seq(GSE60143)/Homer	AYCAGATCTG	1	-0.3753	0.893	1605	0.0506	1606.1	0.0512
GLI3(Zf)/Limb-GLI3-ChIP-Chip(GSE11077)/Homer	CGTGGGTGGTCC	1	-0.3745	0.893	427	0.0135	432.2	0.0138
At2g44940(AP2EREBP)/colamp-At2g44940-DAP-Seq(GSE60143)/Homer	NYACCGACAHNNNNN	1	-0.3741	0.893	537	0.0169	542.9	0.0173
RBPJ:Ebox(?,bHLH)/Panc1-Rbpj1-ChIP-Seq(GSE47459)/Homer	GGGRAARRGRMCAGMTG	1	-0.3728	0.893	987	0.0311	991.6	0.0316
GT1(Trihelix)/col-GT1-DAP-Seq(GSE60143)/Homer	TTAACCATGGTTAAD	1	-0.3605	0.9015	7	0.0002	8.8	0.0003
At1g74840(MYBrelated)/col100-At1g74840-DAP-Seq(GSE60143)/Homer	YHTTATCCAWWT	1	-0.3591	0.9015	933	0.0294	938.5	0.0299
RAP212(AP2EREBP)/col-RAP212-DAP-Seq(GSE60143)/Homer	CGCCGCCATTTT	1	-0.356	0.9031	4348	0.137	4332	0.138
TOD6?/SacCer-Promoters/Homer	GCGATGAGMT	1	-0.3506	0.9069	439	0.0138	445.8	0.0142
AT3G60490(AP2EREBP)/colamp-AT3G60490-DAP-Seq(GSE60143)/Homer	NNRCCGACANNNNNN	1	-0.3473	0.9086	808	0.0255	814.8	0.026
Rap210(AP2EREBP)/col-Rap210-DAP-Seq(GSE60143)/Homer	TGTCGGCA	1	-0.3472	0.9086	1840	0.058	1842.7	0.0587
KLF14(Zf)/HEK293-KLF14.GFP-ChIP-Seq(GSE58341)/Homer	RGKGGGCGKGGC	1	-0.3466	0.9086	10189	0.3211	10122.1	0.3225
Hoxd12(Homeobox)/ChickenMSG-Hoxd12.Flag-ChIP-Seq(GSE86088)/Homer	HDGYAATGAAAN	1	-0.3338	0.9173	2905	0.0915	2902.7	0.0925
At5g62940(C2C2dof)/col-At5g62940-DAP-Seq(GSE60143)/Homer	WHWHHACTTTTT	1	-0.3315	0.9182	7476	0.2356	7437.6	0.237
AT1G76870(Trihelix)/col-AT1G76870-DAP-Seq(GSE60143)/Homer	AAAACCRGWW	1	-0.3315	0.9182	739	0.0233	746.1	0.0238
At4g16750(AP2EREBP)/col-At4g16750-DAP-Seq(GSE60143)/Homer	HACCGACAHA	1	-0.3308	0.9182	2298	0.0724	2299.8	0.0733
RUNX(Runt)/HPC7-Runx1-ChIP-Seq(GSE22178)/Homer	SAAACCACAG	1	-0.3249	0.9207	1829	0.0576	1833.9	0.0584
KLF10(Zf)/HEK293-KLF10.GFP-ChIP-Seq(GSE58341)/Homer	GGGGGTGTGTCC	1	-0.3153	0.9284	2747	0.0866	2748	0.0876
NPAS2(bHLH)/Liver-NPAS2-ChIP-Seq(GSE39860)/Homer	KCCACGTGAC	1	-0.3152	0.9284	3383	0.1066	3379.9	0.1077
At1g76110(ARID)/colamp-At1g76110-DAP-Seq(GSE60143)/Homer	ATTTAATG	1	-0.3138	0.9284	626	0.0197	634.4	0.0202
IDD2(C2H2)/colamp-IDD2-DAP-Seq(GSE60143)/Homer	HAVAAAAMGACAAAA	1	-0.3129	0.9284	182	0.0057	188.6	0.006
At4g38000(C2C2dof)/col-At4g38000-DAP-Seq(GSE60143)/Homer	WWWTWACTTTTT	1	-0.3082	0.9302	1716	0.0541	1722.8	0.0549
Mouse_Recombination_Hotspot(Zf)/Testis-DMC1-ChIP-Seq(GSE24438)/Homer	ACTYKNATTCGTGNTACTTC	1	-0.3068	0.9302	104	0.0033	109.3	0.0035
Smad4(MAD)/ESC-SMAD4-ChIP-Seq(GSE29422)/Homer	VBSYGTCTGG	1	-0.2973	0.9379	5885	0.1855	5865.3	0.1869
CELF2(RRM)/JSL1-CELF2-CLIP-Seq(GSE71264)/Homer	RGTGTCAG	1	-0.2969	0.9379	957	0.0302	966.5	0.0308
Hand2(bHLH)/Mesoderm-Hand2-ChIP-Seq(GSE61475)/Homer	TGACANARRCCAGRC	1	-0.2899	0.9424	1276	0.0402	1285.5	0.041
CDX4(Homeobox)/ZebrafishEmbryos-Cdx4.Myc-ChIP-Seq(GSE48254)/Homer	NGYCATAAAWCH	1	-0.2782	0.9523	1265	0.0399	1275.5	0.0406
Klf4(Zf)/mES-Klf4-ChIP-Seq(GSE11431)/Homer	GCCACACCCA	1	-0.2751	0.954	2024	0.0638	2033	0.0648
AT5G59990(C2C2COlike)/colamp-AT5G59990-DAP-Seq(GSE60143)/Homer	TCTCAACCGTTCATT	1	-0.2748	0.954	45	0.0014	49.7	0.0016
ZNF165(Zf)/WHIM12-ZNF165-ChIP-Seq(GSE65937)/Homer	AAGGKGRCGCAGGCA	1	-0.2598	0.9662	574	0.0181	585.6	0.0187
HSF21(HSF)/col-HSF21-DAP-Seq(GSE60143)/Homer	CTTCTAGAAGMTTYW	1	-0.2567	0.968	192	0.0061	200	0.0064
DEL1(E2FDP)/colamp-DEL1-DAP-Seq(GSE60143)/Homer	TTCCCGCCAA	1	-0.2502	0.9731	9	0.0003	11.5	0.0004
AT1G77200(AP2EREBP)/colamp-AT1G77200-DAP-Seq(GSE60143)/Homer	ACCGACAHWD	1	-0.2334	0.9883	2518	0.0793	2529.6	0.0806
NST1(NAC)/colamp-NST1-DAP-Seq(GSE60143)/Homer	WRCTTRWWNWWYAAG	1	-0.2325	0.9883	1442	0.0454	1456.9	0.0464
At3g04030(G2like)/col-At3g04030-DAP-Seq(GSE60143)/Homer	DRGAATCT	1	-0.2284	0.9907	1731	0.0545	1745.2	0.0556
HSFB3(HSF)/colamp-HSFB3-DAP-Seq(GSE60143)/Homer	TTCTAGAAGMTTHTW	1	-0.2026	1	108	0.0034	116.9	0.0037
T1ISRE(IRF)/ThioMac-Ifnb-Expression/Homer	ACTTTCGTTTCT	1	-0.1935	1	22	0.0007	26.2	0.0008
At4g31060(AP2EREBP)/colamp-At4g31060-DAP-Seq(GSE60143)/Homer	CACCGACAAW	1	-0.1833	1	1105	0.0348	1125	0.0358
HDG7(HB)/col-HDG7-DAP-Seq(GSE60143)/Homer	WGCATTTAATGC	1	-0.1826	1	150	0.0047	160.1	0.0051
ERF38(AP2EREBP)/col-ERF38-DAP-Seq(GSE60143)/Homer	CACCGACA	1	-0.1798	1	1470	0.0463	1490.9	0.0475
At1g22810(AP2EREBP)/colamp-At1g22810-DAP-Seq(GSE60143)/Homer	BCACCGACANNN	1	-0.1791	1	1378	0.0434	1399	0.0446
CCA(Myb)/Arabidopsis-CCA.GFP-ChIP-Seq(GSE70533)/Homer	AGATATYTTT	1	-0.1718	1	1021	0.0322	1041.3	0.0332
At1g25550(G2like)/colamp-At1g25550-DAP-Seq(GSE60143)/Homer	NAGATTCY	1	-0.1704	1	2201	0.0694	2222	0.0708
Prop1(Homeobox)/GHFT1-PROP1.biotin-ChIP-Seq(GSE77302)/Homer	NTAATBNAATTA	1	-0.1687	1	521	0.0164	538.4	0.0172
Adof1(C2C2dof)/col-Adof1-DAP-Seq(GSE60143)/Homer	NRWAAAGYDV	1	-0.1669	1	5942	0.1872	5947.5	0.1895
Nkx2.5(Homeobox)/HL1-Nkx2.5.biotin-ChIP-Seq(GSE21529)/Homer	RRSCACTYAA	1	-0.1468	1	6297	0.1984	6305.1	0.2009
MYB49(MYB)/col-MYB49-DAP-Seq(GSE60143)/Homer	ARKTAGGTRR	1	-0.1414	1	2070	0.0652	2096.1	0.0668
ANAC103(NAC)/col-ANAC103-DAP-Seq(GSE60143)/Homer	AACTTGNWNWNCAAG	1	-0.1413	1	778	0.0245	800.3	0.0255
RBFox2(?)/Heart-RBFox2-CLIP-Seq(GSE57926)/Homer	TGCATGCA	1	-0.1393	1	4702	0.1482	4721.2	0.1504
BBX31(Orphan)/col-BBX31-DAP-Seq(GSE60143)/Homer	NAAAAAGTDA	1	-0.139	1	3116	0.0982	3141	0.1001
Brn1(POU,Homeobox)/NPC-Brn1-ChIP-Seq(GSE35496)/Homer	TATGCWAATBAV	1	-0.1349	1	388	0.0122	406.1	0.0129
Twist(bHLH)/HMLE-TWIST1-ChIP-Seq(Chang_et_al)/Homer	VCAKCTGGNNNCCAGMTGBN	1	-0.1278	1	355	0.0112	373.2	0.0119
ZNF382(Zf)/HEK293-ZNF382.GFP-ChIP-Seq(GSE58341)/Homer	GNCTGTASTRNTGBCTCHTT	1	-0.127	1	53	0.0017	61.3	0.002
ZNF467(Zf)/HEK293-ZNF467.GFP-ChIP-Seq(GSE58341)/Homer	TGGGGAAGGGCM	1	-0.1242	1	3969	0.1251	3995.7	0.1273
AT1G49560(G2like)/colamp-AT1G49560-DAP-Seq(GSE60143)/Homer	GAWTCTNWDA	1	-0.1239	1	2794	0.088	2823.9	0.09
JKD(C2H2)/col-JKD-DAP-Seq(GSE60143)/Homer	TTTTGTCGTTTT	1	-0.1135	1	259	0.0082	276.3	0.0088
AT2G40260(G2like)/colamp-AT2G40260-DAP-Seq(GSE60143)/Homer	WAAAYATTCTTT	1	-0.1074	1	2289	0.0721	2322.1	0.074
GATA11(C2C2gata)/col-GATA11-DAP-Seq(GSE60143)/Homer	DDHYYAGATCTR	1	-0.1061	1	935	0.0295	963.4	0.0307
MYB4(MYB)/col200-MYB4-DAP-Seq(GSE60143)/Homer	WAGKTAGGTARR	1	-0.1017	1	1239	0.039	1271	0.0405
HOXA2(Homeobox)/mES-Hoxa2-ChIP-Seq(Donaldson_et_al.)/Homer	GYCATCMATCAT	1	-0.09278	1	152	0.0048	167.6	0.0053
PTF1(TCP)/colamp-PTF1-DAP-Seq(GSE60143)/Homer	RDDGGGACCACA	1	-0.0917	1	297	0.0094	317	0.0101
Rfx5(HTH)/GM12878-Rfx5-ChIP-Seq(GSE31477)/Homer	SCCTAGCAACAG	1	-0.08596	1	992	0.0313	1024.9	0.0327
GEI-11(Myb?)/cElegans-L4-GEI11-ChIP-Seq(modEncode)/Homer	CCGACAYYTYACGGG	1	-0.08289	1	235	0.0074	254.3	0.0081
CRF10(AP2EREBP)/col100-CRF10-DAP-Seq(GSE60143)/Homer	DCCGCCGYHA	1	-0.08135	1	7508	0.2366	7532.8	0.24
KAN2(G2like)/colamp-KAN2-DAP-Seq(GSE60143)/Homer	ATATTCTY	1	-0.08098	1	1952	0.0615	1991.3	0.0634
At5g66730(C2H2)/colamp-At5g66730-DAP-Seq(GSE60143)/Homer	TTTGTCKTTTTK	1	-0.0805	1	404	0.0127	428.1	0.0136
Nkx2.2(Homeobox)/NPC-Nkx2.2-ChIP-Seq(GSE61673)/Homer	BTBRAGTGSN	1	-0.07995	1	5965	0.188	5998.2	0.1911
OBP1(C2C2dof)/col-OBP1-DAP-Seq(GSE60143)/Homer	NHHACTTTWT	1	-0.07783	1	5731	0.1806	5766.3	0.1837
DMRT1(DM)/Testis-DMRT1-ChIP-Seq(GSE64892)/Homer	TWGHWACAWTGTWDC	1	-0.07487	1	336	0.0106	359.7	0.0115
AT5G25475(ABI3VP1)/col-AT5G25475-DAP-Seq(GSE60143)/Homer	RNNRNCAAGCADNDB	1	-0.07118	1	3340	0.1053	3384.1	0.1078
Initiator/Drosophila-Promoters/Homer	NTCAGTYG	1	-0.06985	1	5905	0.1861	5943	0.1893
PCF/Arabidopsis-Promoters/Homer	NNWWWTGGGCYTDDN	1	-0.06913	1	381	0.012	406.4	0.0129
Barx1(Homeobox)/Stomach-Barx1.3xFlag-ChIP-Seq(GSE69483)/Homer	AAACMATTAN	1	-0.06897	1	609	0.0192	639.9	0.0204
ERF4(AP2EREBP)/colamp-ERF4-DAP-Seq(GSE60143)/Homer	WDWTGGCGGCGG	1	-0.06558	1	5699	0.1796	5740	0.1829
ASHR1(ND)/col-ASHR1-DAP-Seq(GSE60143)/Homer	NTGGTGAN	1	-0.06359	1	3589	0.1131	3636.4	0.1159
AT2G38300(G2like)/col-AT2G38300-DAP-Seq(GSE60143)/Homer	ADRGAATGTT	1	-0.06272	1	1845	0.0581	1889.8	0.0602
At2g41835(C2H2)/col-At2g41835-DAP-Seq(GSE60143)/Homer	TTTGAAAA	1	-0.06145	1	695	0.0219	728.6	0.0232
MYB39(MYB)/col-MYB39-DAP-Seq(GSE60143)/Homer	WWAARKTAGGTGRAA	1	-0.06127	1	224	0.0071	245.1	0.0078
Klf9(Zf)/GBM-Klf9-ChIP-Seq(GSE62211)/Homer	GCCACRCCCACY	1	-0.05912	1	2561	0.0807	2609.1	0.0831
Tbox:Smad(T-box,MAD)/ESCd5-Smad2_3-ChIP-Seq(GSE29422)/Homer	AGGTGHCAGACA	1	-0.05843	1	470	0.0148	499.4	0.0159
ERF8(AP2EREBP)/colamp-ERF8-DAP-Seq(GSE60143)/Homer	CGCCGYCATW	1	-0.05657	1	5675	0.1788	5721.1	0.1823
IRF4(IRF)/GM12878-IRF4-ChIP-Seq(GSE32465)/Homer	ACTGAAACCA	1	-0.05647	1	874	0.0275	911.1	0.029
HOXA1(Homeobox)/mES-Hoxa1-ChIP-Seq(SRP084292)/Homer	TGATKGATGR	1	-0.05527	1	374	0.0118	401.9	0.0128
HOXD13(Homeobox)/Chicken-Hoxd13-ChIP-Seq(GSE38910)/Homer	NCYAATAAAA	1	-0.05269	1	1379	0.0435	1423.9	0.0454
MYB107(MYB)/col-MYB107-DAP-Seq(GSE60143)/Homer	RGTWGGTRRR	1	-0.05074	1	4054	0.1278	4107.3	0.1309
MYB44(MYB)/colamp-MYB44-DAP-Seq(GSE60143)/Homer	CVGTTWWKTCNGTTA	1	-0.04859	1	131	0.0041	149.2	0.0048
GATA(Zf),IR4/iTreg-Gata3-ChIP-Seq(GSE20898)/Homer	NAGATWNBNATCTNN	1	-0.04858	1	87	0.0027	102.1	0.0033
AT4G37180(G2like)/col-AT4G37180-DAP-Seq(GSE60143)/Homer	AGAATCTTNN	1	-0.04605	1	2358	0.0743	2411.6	0.0768
At3g12730(G2like)/colamp-At3g12730-DAP-Seq(GSE60143)/Homer	AAGATTCT	1	-0.04584	1	2592	0.0817	2646.9	0.0843
ERF105(AP2EREBP)/colamp-ERF105-DAP-Seq(GSE60143)/Homer	TGGCGGCT	1	-0.045	1	7837	0.247	7881.7	0.2511
Smad2(MAD)/ES-SMAD2-ChIP-Seq(GSE29422)/Homer	CTGTCTGG	1	-0.04394	1	5710	0.1799	5764.7	0.1837
ZNF41(Zf)/HEK293-ZNF41.GFP-ChIP-Seq(GSE58341)/Homer	CCTCATGGTGYCYTWYTCCCTTGTG	1	-0.04209	1	48	0.0015	60.8	0.0019
SCRT1(Zf)/HEK293-SCRT1.eGFP-ChIP-Seq(Encode)/Homer	GCAACAGGTG	1	-0.03815	1	906	0.0286	949.8	0.0303
ANAC075(NAC)/col-ANAC075-DAP-Seq(GSE60143)/Homer	CTTSWWNWWSAAGYT	1	-0.03795	1	647	0.0204	685.3	0.0218
dof43(C2C2dof)/colamp-dof43-DAP-Seq(GSE60143)/Homer	NAAAAAGTDA	1	-0.03501	1	2841	0.0895	2903	0.0925
Nkx3.1(Homeobox)/LNCaP-Nkx3.1-ChIP-Seq(GSE28264)/Homer	AAGCACTTAA	1	-0.03409	1	6327	0.1994	6387.9	0.2035
GRF9(GRF)/colamp-GRF9-DAP-Seq(GSE60143)/Homer	NWCTGACANNNNNNN	1	-0.03277	1	2499	0.0788	2560.7	0.0816
At1g68670(G2like)/colamp-At1g68670-DAP-Seq(GSE60143)/Homer	WNWWHNRAAGATTCT	1	-0.03153	1	563	0.0177	601.9	0.0192
dof45(C2C2dof)/col-dof45-DAP-Seq(GSE60143)/Homer	NVAWAAAGTN	1	-0.03095	1	5009	0.1578	5075.7	0.1617
IDD4(C2H2)/col-IDD4-DAP-Seq(GSE60143)/Homer	TTTGTCTTTWTB	1	-0.02682	1	1611	0.0508	1669.7	0.0532
Pitx1(Homeobox)/Chicken-Pitx1-ChIP-Seq(GSE38910)/Homer	TAATCCCN	1	-0.02645	1	10086	0.3178	10135.1	0.3229
HINFP(Zf)/K562-HINFP.eGFP-ChIP-Seq(Encode)/Homer	TWVGGTCCGC	1	-0.02641	1	2260	0.0712	2324.7	0.0741
Pax7(Paired,Homeobox),longest/Myoblast-Pax7-ChIP-Seq(GSE25064)/Homer	NTAATTDGCYAATTANNWWD	1	-0.02513	1	14	0.0004	22.4	0.0007
AT4G26030(C2H2)/col-AT4G26030-DAP-Seq(GSE60143)/Homer	BYYACCWACY	1	-0.02508	1	2125	0.067	2189.8	0.0698
HLH-1(bHLH)/cElegans-Embryo-HLH1-ChIP-Seq(modEncode)/Homer	RACAGCTGTTBH	1	-0.02383	1	2129	0.0671	2194.2	0.0699
AT2G20400(G2like)/colamp-AT2G20400-DAP-Seq(GSE60143)/Homer	DNVGAATATTCBNHN	1	-0.02245	1	115	0.0036	136.1	0.0043
AT1G04880(ARID)/colamp-AT1G04880-DAP-Seq(GSE60143)/Homer	AAACTATATADTATA	1	-0.02141	1	61	0.0019	77.7	0.0025
MYB58(MYB)/colamp-MYB58-DAP-Seq(GSE60143)/Homer	YYYACCWACC	1	-0.02068	1	2054	0.0647	2121.7	0.0676
MGP(C2H2)/colamp-MGP-DAP-Seq(GSE60143)/Homer	TTTTGTCGTTTW	1	-0.02034	1	376	0.0118	412.6	0.0131
bHLH18(bHLH)/col-bHLH18-DAP-Seq(GSE60143)/Homer	CACGTGTTYCACGTG	1	-0.01555	1	45	0.0014	60.6	0.0019
AtGRF6(GRF)/col-AtGRF6-DAP-Seq(GSE60143)/Homer	NTGTCAGADNNNNNN	1	-0.01465	1	3494	0.1101	3577.2	0.114
GATA6(C2C2gata)/col200-GATA6-DAP-Seq(GSE60143)/Homer	TAGATCTARAHH	1	-0.01257	1	242	0.0076	275.1	0.0088
KANADI1(Myb)/Seedling-KAN1-ChIP-Seq(GSE48081)/Homer	ARGAATAWWN	1	-0.01242	1	1517	0.0478	1586.2	0.0505
MYB10(MYB)/col-MYB10-DAP-Seq(GSE60143)/Homer	YCCACCTACCHH	1	-0.01202	1	922	0.0291	980.9	0.0313
TATA-Box(TBP)/Promoter/Homer	CCTTTTAWAGSC	1	-0.01141	1	2632	0.0829	2715.8	0.0865
Unknown(Homeobox)/Limb-p300-ChIP-Seq/Homer	SSCMATWAAA	1	-0.01132	1	934	0.0294	993.9	0.0317
Ascl1(bHLH)/NeuralTubes-Ascl1-ChIP-Seq(GSE55840)/Homer	NNVVCAGCTGBN	1	-0.009954	1	5708	0.1799	5804.7	0.1849
ZBTB12(Zf)/HEK293-ZBTB12.GFP-ChIP-Seq(GSE58341)/Homer	NGNTCTAGAACCNGV	1	-0.009703	1	1365	0.043	1435.7	0.0457
PLT3(AP2EREBP)/col-PLT3-DAP-Seq(GSE60143)/Homer	GCACGNWTHYCGAGG	1	-0.008965	1	133	0.0042	160.2	0.0051
At1g14580(C2H2)/colamp-At1g14580-DAP-Seq(GSE60143)/Homer	CASAAAAMGACAAAA	1	-0.006815	1	346	0.0109	389.4	0.0124
PAX3:FKHR-fusion(Paired,Homeobox)/Rh4-PAX3:FKHR-ChIP-Seq(GSE19063)/Homer	ACCRTGACTAATTNN	1	-0.00659	1	289	0.0091	329.7	0.0105
Egr2(Zf)/Thymocytes-Egr2-ChIP-Seq(GSE34254)/Homer	NGCGTGGGCGGR	1	-0.005636	1	1010	0.0318	1079.8	0.0344
PSE(SNAPc)/K562-mStart-Seq/Homer	WAVTCACCMTAASYDAAAAG	1	-0.005364	1	850	0.0268	915.5	0.0292
SEP3(MADS)/Arabidoposis-Flower-Sep3-ChIP-Seq/Homer	CCAAAAAGGG	1	-0.00527	1	2365	0.0745	2459	0.0783
EIN3(EIL)/col-EIN3-DAP-Seq(GSE60143)/Homer	ARATTCAATGWATYT	1	-0.004555	1	122	0.0038	151.2	0.0048
MYB74(MYB)/colamp-MYB74-DAP-Seq(GSE60143)/Homer	YYYACCTACCWH	1	-0.004393	1	1212	0.0382	1289.1	0.0411
DREB26(AP2EREBP)/col-DREB26-DAP-Seq(GSE60143)/Homer	CCACCGACAH	1	-0.004024	1	883	0.0278	952.4	0.0303
MYB99(MYB)/colamp-MYB99-DAP-Seq(GSE60143)/Homer	GGTAGGTG	1	-0.003886	1	2147	0.0677	2243.4	0.0715
bZIP:IRF(bZIP,IRF)/Th17-BatF-ChIP-Seq(GSE39756)/Homer	NAGTTTCABTHTGACTNW	1	-0.003837	1	641	0.0202	702.2	0.0224
ERF7(AP2EREBP)/col-ERF7-DAP-Seq(GSE60143)/Homer	ATGRCGGCGG	1	-0.003603	1	6614	0.2084	6735.7	0.2146
TRP2(MYBrelated)/colamp-TRP2-DAP-Seq(GSE60143)/Homer	TAAACCCT	1	-0.003204	1	360	0.0113	409.1	0.013
Pho2(bHLH)/Yeast-Pho2-ChIP-Seq(GSE29506)/Homer	CCCACGTGCT	1	-0.002731	1	1829	0.0576	1925.1	0.0613
MYB63(MYB)/col-MYB63-DAP-Seq(GSE60143)/Homer	BHYACCWACCHH	1	-0.002362	1	1130	0.0356	1212.3	0.0386
MYB67(MYB)/col-MYB67-DAP-Seq(GSE60143)/Homer	YYYACCTAAC	1	-0.002137	1	1973	0.0622	2075.5	0.0661
BPC1(BBRBPC)/colamp-BPC1-DAP-Seq(GSE60143)/Homer	GARGAGAGAGAA	1	-0.001978	1	1613	0.0508	1709.2	0.0545
OCT:OCT-short(POU,Homeobox)/NPC-OCT6-ChIP-Seq(GSE43916)/Homer	ATGCATWATGCATRW	1	-0.001705	1	665	0.021	734.6	0.0234
ERF3(AP2EREBP)/colamp-ERF3-DAP-Seq(GSE60143)/Homer	ATGGCGGCGG	1	-0.001633	1	4136	0.1303	4267.9	0.136
ERF11(AP2EREBP)/col-ERF11-DAP-Seq(GSE60143)/Homer	RTGGCGGCGG	1	-0.001629	1	5055	0.1593	5191.5	0.1654
ERF9(AP2EREBP)/colamp-ERF9-DAP-Seq(GSE60143)/Homer	AWATGGCGGCGG	1	-0.001568	1	2012	0.0634	2119.4	0.0675
SGR5(C2H2)/colamp-SGR5-DAP-Seq(GSE60143)/Homer	TTTGTCTTTTTT	1	-0.001389	1	1207	0.038	1297.5	0.0413
ANAC062(NAC)/colamp-ANAC062-DAP-Seq(GSE60143)/Homer	TACTTANTNWNYAAG	1	-0.001295	1	681	0.0215	753.4	0.024
GATA1(C2C2gata)/colamp-GATA1-DAP-Seq(GSE60143)/Homer	DDWWYYAGATCTRRW	1	-0.000988	1	698	0.022	773.1	0.0246
RUNX2(Runt)/PCa-RUNX2-ChIP-Seq(GSE33889)/Homer	NWAACCACADNN	1	-0.000969	1	1889	0.0595	2000.3	0.0637
At1g64620(C2C2dof)/colamp-At1g64620-DAP-Seq(GSE60143)/Homer	CACTTTTT	1	-0.000858	1	2993	0.0943	3124.4	0.0995
AT3G51470(DBP)/col-AT3G51470-DAP-Seq(GSE60143)/Homer	TTWHGGTGCACC	1	-0.000806	1	4151	0.1308	4295.6	0.1369
At3g45610(C2C2dof)/col-At3g45610-DAP-Seq(GSE60143)/Homer	TWACTTTTTS	1	-0.000747	1	2983	0.094	3116.5	0.0993
Pit1(Homeobox)/GCrat-Pit1-ChIP-Seq(GSE58009)/Homer	ATGMATATDC	1	-0.000616	1	1130	0.0356	1226.7	0.0391
RLR1?/SacCer-Promoters/Homer	WTTTTCYYTTTT	1	-0.000562	1	993	0.0313	1085.5	0.0346
Nkx2.1(Homeobox)/LungAC-Nkx2.1-ChIP-Seq(GSE43252)/Homer	RSCACTYRAG	1	-0.000456	1	8549	0.2694	8716.1	0.2777
Oct6(POU,Homeobox)/NPC-Pou3f1-ChIP-Seq(GSE35496)/Homer	WATGCAAATGAG	1	-0.000418	1	499	0.0157	570.1	0.0182
DMRT6(DM)/Testis-DMRT6-ChIP-Seq(GSE60440)/Homer	YDGHTACAWTGTADC	1	-0.000333	1	275	0.0087	331.8	0.0106
ERF104(AP2EREBP)/col-ERF104-DAP-Seq(GSE60143)/Homer	GGCGGCGG	1	-0.000333	1	6593	0.2078	6766.7	0.2156
FUS3(ABI3VP1)/col-FUS3-DAP-Seq(GSE60143)/Homer	DNNWTNTGCATGKNN	1	-0.000314	1	1851	0.0583	1975.1	0.0629
PRDM9(Zf)/Testis-DMC1-ChIP-Seq(GSE35498)/Homer	ADGGYAGYAGCATCT	1	-0.00028	1	1225	0.0386	1332.8	0.0425
REST-NRSF(Zf)/Jurkat-NRSF-ChIP-Seq/Homer	GGMGCTGTCCATGGTGCTGA	1	-0.000238	1	20	0.0006	39.4	0.0013
At2g03500(G2like)/col-At2g03500-DAP-Seq(GSE60143)/Homer	WWAGAATATTCT	1	-0.000162	1	229	0.0072	284.2	0.0091
MYB55(MYB)/colamp-MYB55-DAP-Seq(GSE60143)/Homer	YACCWAMC	1	-9.1e-05	1	2281	0.0719	2430.7	0.0774
RUNX1(Runt)/Jurkat-RUNX1-ChIP-Seq(GSE29180)/Homer	AAACCACARM	1	-6.7e-05	1	2473	0.0779	2630.3	0.0838
OCT:OCT(POU,Homeobox)/NPC-OCT6-ChIP-Seq(GSE43916)/Homer	YATGCATATRCATRT	1	-5.5e-05	1	66	0.0021	101.2	0.0032
GSC(Homeobox)/FrogEmbryos-GSC-ChIP-Seq(DRA000576)/Homer	RGGATTAR	1	-5.3e-05	1	2226	0.0701	2380.7	0.0759
Zfp281(Zf)/ES-Zfp281-ChIP-Seq(GSE81042)/Homer	CCCCTCCCCCAC	1	-4.6e-05	1	1282	0.0404	1408.3	0.0449
GATA3(Zf),DR8/iTreg-Gata3-ChIP-Seq(GSE20898)/Homer	AGATSTNDNNDSAGATAASN	1	-3.3e-05	1	83	0.0026	123.9	0.0039
VRN1(ABI3VP1)/col-VRN1-DAP-Seq(GSE60143)/Homer	TTTTTTTTTT	1	-2.6e-05	1	483	0.0152	570.8	0.0182
ATY19(MYB)/col-ATY19-DAP-Seq(GSE60143)/Homer	YYCACCWACCAT	1	-1.6e-05	1	1617	0.051	1765.2	0.0562
ESE3(AP2EREBP)/col-ESE3-DAP-Seq(GSE60143)/Homer	GACGGTGG	1	-1.6e-05	1	7153	0.2254	7384.5	0.2353
OCT4-SOX2-TCF-NANOG(POU,Homeobox,HMG)/mES-Oct4-ChIP-Seq(GSE11431)/Homer	ATTTGCATAACAATG	1	-1.3e-05	1	151	0.0048	206.6	0.0066
MYB51(MYB)/col-MYB51-DAP-Seq(GSE60143)/Homer	GGTAGGTG	1	-1.1e-05	1	2149	0.0677	2318.4	0.0739
WT1(Zf)/Kidney-WT1-ChIP-Seq(GSE90016)/Homer	MCTCCCMCRCAB	1	-1e-05	1	2823	0.089	3011.4	0.0959
Bapx1(Homeobox)/VertebralCol-Bapx1-ChIP-Seq(GSE36672)/Homer	TTRAGTGSYK	1	-9e-06	1	5913	0.1863	6146.7	0.1958
GAGA-repeat/Arabidopsis-Promoters/Homer	CTCTCTCTCY	1	-7e-06	1	3827	0.1206	4038.3	0.1287
EGL-5(Homeobox)/cElegans-L3-EGL5-ChIP-Seq(modEncode)/Homer	ATTTAATGGG	1	-7e-06	1	2129	0.0671	2302	0.0733
REM19(REM)/colamp-REM19-DAP-Seq(GSE60143)/Homer	AAAAAAAA	1	-6e-06	1	1143	0.036	1280.3	0.0408
TCP3(TCP)/colamp-TCP3-DAP-Seq(GSE60143)/Homer	WGTGGTCCCAAHWWW	1	-6e-06	1	705	0.0222	817.4	0.026
Unknown4/Arabidopsis-Promoters/Homer	CKTCKTCTTY	1	-4e-06	1	3029	0.0955	3231.4	0.103
MYB93(MYB)/colamp-MYB93-DAP-Seq(GSE60143)/Homer	GGTAGGTGRD	1	-4e-06	1	2623	0.0827	2816.1	0.0897
AT4G18450(AP2EREBP)/col-AT4G18450-DAP-Seq(GSE60143)/Homer	ATGGCGGCKG	1	-4e-06	1	2987	0.0941	3189.8	0.1016
Znf263(Zf)/K562-Znf263-ChIP-Seq(GSE31477)/Homer	CVGTSCTCCC	1	-4e-06	1	7734	0.2437	7992.8	0.2547
TF3A(C2H2)/col-TF3A-DAP-Seq(GSE60143)/Homer	NNDDGAGGAGGWNNN	1	-2e-06	1	4649	0.1465	4889.8	0.1558
PUCHI(AP2EREBP)/colamp-PUCHI-DAP-Seq(GSE60143)/Homer	GCGCCGTY	1	-1e-06	1	5021	0.1582	5273.4	0.168
At5g29000(G2like)/col-At5g29000-DAP-Seq(GSE60143)/Homer	RGAATATTCYHH	1	-1e-06	1	242	0.0076	321.3	0.0102
MYB17(MYB)/colamp-MYB17-DAP-Seq(GSE60143)/Homer	GGTAGGTGRG	1	0	1	1494	0.0471	1671.5	0.0533
AT5G45580(G2like)/colamp-AT5G45580-DAP-Seq(GSE60143)/Homer	ADRGAATCTH	1	0	1	2727	0.0859	2952.1	0.0941
MYB94(MYB)/col-MYB94-DAP-Seq(GSE60143)/Homer	WGGTRGTTGGKA	1	0	1	985	0.031	1139.9	0.0363
ERF73(AP2EREBP)/col-ERF73-DAP-Seq(GSE60143)/Homer	CCGCCGCC	1	0	1	4880	0.1538	5164.8	0.1646
PRDM10(Zf)/HEK293-PRDM10.eGFP-ChIP-Seq(Encode)/Homer	TGGTACATTCCA	1	0	1	1597	0.0503	1792.4	0.0571
TATA-box/SacCer-Promoters/Homer	BBHWTATATA	1	0	1	488	0.0154	607.7	0.0194
LEP(AP2EREBP)/col-LEP-DAP-Seq(GSE60143)/Homer	CDCCGCCGTC	1	0	1	2272	0.0716	2499.7	0.0796
ESE1(AP2EREBP)/col-ESE1-DAP-Seq(GSE60143)/Homer	GGCGGCGG	1	0	1	5475	0.1725	5785	0.1843
Ptf1a(bHLH)/Panc1-Ptf1a-ChIP-Seq(GSE47459)/Homer	ACAGCTGTTN	1	0	1	9100	0.2868	9442	0.3008
MYB3(MYB)/Arabidopsis-MYB3-ChIP-Seq(GSE80564)/Homer	GKTAGGTRGG	1	0	1	4983	0.157	5293.5	0.1687
AT1G24250(Orphan)/col-AT1G24250-DAP-Seq(GSE60143)/Homer	KTDGTTGGTDGTTGG	1	0	1	659	0.0208	811.5	0.0259
Maz(Zf)/HepG2-Maz-ChIP-Seq(GSE31477)/Homer	GGGGGGGG	1	0	1	7703	0.2427	8071.8	0.2572
bcd(Homeobox)/Embryo-Bcd-ChIP-Seq(GSE86966)/Homer	VNNGGATTADNN	1	0	1	2475	0.078	2738.2	0.0872
MYB92(MYB)/colamp-MYB92-DAP-Seq(GSE60143)/Homer	GGTAGGTR	1	0	1	2448	0.0771	2710.1	0.0863
ARF2(ARF)/col-ARF2-DAP-Seq(GSE60143)/Homer	TTGTCGGMWN	1	0	1	8976	0.2829	9361	0.2982
MYB13(MYB)/col-MYB13-DAP-Seq(GSE60143)/Homer	HYCACCWACCHH	1	0	1	1616	0.0509	1843.1	0.0587
LRF(Zf)/Erythroblasts-ZBTB7A-ChIP-Seq(GSE74977)/Homer	AAGACCCYYN	1	0	1	7037	0.2218	7412.7	0.2362
MYB83(MYB)/colamp-MYB83-DAP-Seq(GSE60143)/Homer	CACCAACCWH	1	0	1	3827	0.1206	4146.1	0.1321
ERF10(AP2EREBP)/col-ERF10-DAP-Seq(GSE60143)/Homer	RTGGCGGCGG	1	0	1	4284	0.135	4615.4	0.147
TATA-box/Drosophila-Promoters/Homer	CTATAAAAGCSV	1	0	1	96	0.003	167.3	0.0053
HEB(bHLH)/mES-Heb-ChIP-Seq(GSE53233)/Homer	VCAGCTGBNN	1	0	1	6894	0.2173	7277.9	0.2319
ERF2(AP2EREBP)/colamp-ERF2-DAP-Seq(GSE60143)/Homer	GGCGGCTG	1	0	1	4920	0.155	5274	0.168
ERF1(AP2EREBP)/colamp-ERF1-DAP-Seq(GSE60143)/Homer	GGCGGCTR	1	0	1	4320	0.1361	4661.2	0.1485
MYB96(MYB)/colamp-MYB96-DAP-Seq(GSE60143)/Homer	WGGTRGTTGG	1	0	1	2207	0.0695	2477.2	0.0789
FRS9(ND)/col-FRS9-DAP-Seq(GSE60143)/Homer	RGAGAGAGAAAG	1	0	1	803	0.0253	984.5	0.0314
Zelda(Zf)/Embryo-zld-ChIP-Seq(GSE65441)/Homer	KBCTACCTGW	1	0	1	1322	0.0417	1547	0.0493
At2g01060(G2like)/colamp-At2g01060-DAP-Seq(GSE60143)/Homer	AGATKCBNWW	1	0	1	5878	0.1852	6267.1	0.1997
E2A(bHLH)/proBcell-E2A-ChIP-Seq(GSE21978)/Homer	DNRCAGCTGY	1	0	1	5311	0.1674	5693.7	0.1814
HAP3(CCAATHAP3)/col-HAP3-DAP-Seq(GSE60143)/Homer	TGATGGAW	1	0	1	597	0.0188	761.2	0.0243
BPC6(BBRBPC)/col-BPC6-DAP-Seq(GSE60143)/Homer	YTYTCTCTCTCTCTA	1	0	1	135	0.0043	223.6	0.0071
ERF5(AP2EREBP)/colamp-ERF5-DAP-Seq(GSE60143)/Homer	DCMGCCGCCA	1	0	1	3106	0.0979	3428.7	0.1092
MYB61(MYB)/colamp-MYB61-DAP-Seq(GSE60143)/Homer	HCYACCTACC	1	0	1	3476	0.1095	3819.8	0.1217
MYB30(MYB)/colamp-MYB30-DAP-Seq(GSE60143)/Homer	AGGTAGTTGG	1	0	1	2640	0.0832	2971.8	0.0947
ZML2(C2C2gata)/col-ZML2-DAP-Seq(GSE60143)/Homer	CATCATCATC	1	0	1	343	0.0108	486.9	0.0155
AT3G57600(AP2EREBP)/col-AT3G57600-DAP-Seq(GSE60143)/Homer	GGCGGTGG	1	0	1	4785	0.1508	5203.8	0.1658
Otx2(Homeobox)/EpiLC-Otx2-ChIP-Seq(GSE56098)/Homer	NYTAATCCYB	1	0	1	1501	0.0473	1774.1	0.0565
SeqBias: CA-repeat	CACACACACA	1	0	1	15510	0.4888	15985.3	0.5093
Egr1(Zf)/K562-Egr1-ChIP-Seq(GSE32465)/Homer	TGCGTGGGYG	1	0	1	3343	0.1053	3728.4	0.1188
SHN3(AP2EREBP)/col-SHN3-DAP-Seq(GSE60143)/Homer	CCGCCGCC	1	0	1	2759	0.0869	3139.5	0.1
E2A(bHLH),near_PU.1/Bcell-PU.1-ChIP-Seq(GSE21512)/Homer	NVCACCTGBN	1	0	1	4705	0.1483	5603.4	0.1785
Slug(Zf)/Mesoderm-Snai2-ChIP-Seq(GSE61475)/Homer	SNGCACCTGCHS	1	0	1	1766	0.0557	2257.8	0.0719
ZEB1(Zf)/PDAC-ZEB1-ChIP-Seq(GSE64557)/Homer	VCAGGTRDRY	1	0	1	5548	0.1748	6541.4	0.2084
ZEB2(Zf)/SNU398-ZEB2-ChIP-Seq(GSE103048)/Homer	GNMCAGGTGTGC	1	0	1	3268	0.103	3881.3	0.1237
At3g24120(G2like)/col-At3g24120-DAP-Seq(GSE60143)/Homer	NWWAGMATMW	1	0	1	6554	0.2065	7138.7	0.2274
ATY13(MYB)/col-ATY13-DAP-Seq(GSE60143)/Homer	YYYAACYRHH	1	0	1	8650	0.2726	9247.7	0.2946
CRF4(AP2EREBP)/colamp-CRF4-DAP-Seq(GSE60143)/Homer	CGCCGCCA	1	0	1	3919	0.1235	4396.7	0.1401
NGA4(ABI3VP1)/col-NGA4-DAP-Seq(GSE60143)/Homer	TKNTCAGGTG	1	0	1	8197	0.2583	8959.3	0.2854

## Sheet: COUP-TFII_Pos_Diff_Enriched
Motif Name	Consensus	P-value	Log P-value	q-value (Benjamini)	# of Target Sequences with Motif(of 2484)	% of Target Sequences with Motif	# of Background Sequences with Motif(of 47043)	% of Background Sequences with Motif
COUP-TFII(NR)/K562-NR2F1-ChIP-Seq(Encode)/Homer	GKBCARAGGTCA	1e-56	-129	0	668	0.2689	6873	0.1461
COUP-TFII(NR)/Artia-Nr2f2-ChIP-Seq(GSE46497)/Homer	AGRGGTCA	1e-51	-119.6	0	760	0.306	8457.7	0.1798
EAR2(NR)/K562-NR2F6-ChIP-Seq(Encode)/Homer	NRBCARRGGTCA	1e-48	-111.7	0	606	0.244	6299.6	0.1339
HNF4a(NR),DR1/HepG2-HNF4a-ChIP-Seq(GSE25021)/Homer	CARRGKBCAAAGTYCA	1e-45	-104.2	0	277	0.1115	2012.1	0.0428
PPARa(NR),DR1/Liver-Ppara-ChIP-Seq(GSE47954)/Homer	VNAGGKCAAAGGTCA	1e-41	-94.41	0	481	0.1936	4829	0.1026
RARa(NR)/K562-RARa-ChIP-Seq(Encode)/Homer	TTGAMCTTTG	1e-37	-85.31	0	992	0.3994	13165.2	0.2798
Esrrb(NR)/mES-Esrrb-ChIP-Seq(GSE11431)/Homer	KTGACCTTGA	1e-33	-77.98	0	324	0.1304	2958.9	0.0629
TR4(NR),DR1/Hela-TR4-ChIP-Seq(GSE24685)/Homer	GAGGTCAAAGGTCA	1e-30	-70.57	0	107	0.0431	518.1	0.011
Erra(NR)/HepG2-Erra-ChIP-Seq(GSE31477)/Homer	CAAAGGTCAG	1e-28	-66.36	0	869	0.3498	11694.8	0.2486
Nur77(NR)/K562-NR4A1-ChIP-Seq(GSE31363)/Homer	TGACCTTTNCNT	1e-22	-51.54	0	92	0.037	511.1	0.0109
RXR(NR),DR1/3T3L1-RXR-ChIP-Seq(GSE13511)/Homer	TAGGGCAAAGGTCA	1e-21	-49.41	0	446	0.1795	5350.7	0.1137
THRb(NR)/Liver-NR1A2-ChIP-Seq(GSE52613)/Homer	TRAGGTCA	1e-19	-45.24	0	1297	0.5221	20244.3	0.4303
ERG(ETS)/VCaP-ERG-ChIP-Seq(GSE14097)/Homer	ACAGGAAGTG	1e-19	-44.66	0	598	0.2407	7937.6	0.1687
NLP7(RWPRK)/col-NLP7-DAP-Seq(GSE60143)/Homer	TGRCCYTTCR	1e-18	-43.16	0	629	0.2532	8506.5	0.1808
PPARE(NR),DR1/3T3L1-Pparg-ChIP-Seq(GSE13511)/Homer	TGACCTTTGCCCCA	1e-17	-41.21	0	366	0.1473	4354.5	0.0926
Fli1(ETS)/CD8-FLI-ChIP-Seq(GSE20898)/Homer	NRYTTCCGGH	1e-15	-36.25	0	487	0.1961	6431.6	0.1367
dHNF4(NR)/Fly-HNF4-ChIP-Seq(GSE73675)/Homer	GGTCCAAAGTCCAMT	1e-15	-35.6	0	41	0.0165	157.8	0.0034
HLF(bZIP)/HSC-HLF.Flag-ChIP-Seq(GSE69817)/Homer	RTTATGYAAB	1e-14	-32.83	0	185	0.0745	1900.1	0.0404
ETV1(ETS)/GIST48-ETV1-ChIP-Seq(GSE22441)/Homer	AACCGGAAGT	1e-14	-32.6	0	544	0.219	7515.5	0.1597
NFIL3(bZIP)/HepG2-NFIL3-ChIP-Seq(Encode)/Homer	VTTACGTAAYNNNNN	1e-13	-31.83	0	154	0.062	1494.7	0.0318
ETV4(ETS)/HepG2-ETV4-ChIP-Seq(ENCODE)/Homer	ACCGGAAGTG	1e-13	-30.33	0	503	0.2025	6929.2	0.1473
Etv2(ETS)/ES-ER71-ChIP-Seq(GSE59402)/Homer(0.967)	NNAYTTCCTGHN	1e-12	-29.76	0	356	0.1433	4562	0.097
Gata1(Zf)/K562-GATA1-ChIP-Seq(GSE18829)/Homer	SAGATAAGRV	1e-11	-27.61	0	152	0.0612	1551.8	0.033
Arnt:Ahr(bHLH)/MCF7-Arnt-ChIP-Seq(Lo_et_al.)/Homer	TBGCACGCAA	1e-11	-27.36	0	289	0.1163	3590.4	0.0763
Gata6(Zf)/HUG1N-GATA6-ChIP-Seq(GSE51936)/Homer	YCTTATCTBN	1e-11	-26.04	0	202	0.0813	2307.1	0.049
Foxa2(Forkhead)/Liver-Foxa2-ChIP-Seq(GSE25694)/Homer	CYTGTTTACWYW	1e-11	-25.5	0	195	0.0785	2218.7	0.0472
ETS1(ETS)/Jurkat-ETS1-ChIP-Seq(GSE17954)/Homer	ACAGGAAGTG	1e-11	-25.43	0	400	0.161	5437.6	0.1156
GABPA(ETS)/Jurkat-GABPa-ChIP-Seq(GSE17954)/Homer	RACCGGAAGT	1e-10	-24.89	0	378	0.1522	5100	0.1084
Elf4(ETS)/BMDM-Elf4-ChIP-Seq(GSE88699)/Homer	ACTTCCKGKT	1e-10	-24.71	0	399	0.1606	5451.4	0.1159
FOXM1(Forkhead)/MCF7-FOXM1-ChIP-Seq(GSE72977)/Homer	TRTTTACTTW	1e-10	-24.68	0	228	0.0918	2736.7	0.0582
WRKY27(WRKY)/colamp-WRKY27-DAP-Seq(GSE60143)/Homer	NHGTTGACYTWD	1e-10	-24.51	0	202	0.0813	2349.4	0.0499
Ets1-distal(ETS)/CD4+-PolII-ChIP-Seq(Barski_et_al.)/Homer	MACAGGAAGT	1e-10	-24.18	0	124	0.0499	1236.6	0.0263
EWS:ERG-fusion(ETS)/CADO_ES1-EWS:ERG-ChIP-Seq(SRA014231)/Homer	ATTTCCTGTN	1e-10	-23.79	0	218	0.0878	2611.3	0.0555
Gata2(Zf)/K562-GATA2-ChIP-Seq(GSE18829)/Homer	BBCTTATCTS	1e-10	-23.62	0	157	0.0632	1712.2	0.0364
Foxa3(Forkhead)/Liver-Foxa3-ChIP-Seq(GSE77670)/Homer	BSNTGTTTACWYWGN	1e-10	-23.34	0	84	0.0338	725	0.0154
GATA3(Zf)/iTreg-Gata3-ChIP-Seq(GSE20898)/Homer	AGATAASR	1e-10	-23.24	0	310	0.1248	4067.5	0.0865
NF1:FOXA1(CTF,Forkhead)/LNCAP-FOXA1-ChIP-Seq(GSE27824)/Homer	WNTGTTTRYTTTGGCA	1e-09	-22.99	0	29	0.0117	125.8	0.0027
WRKY6(WRKY)/colamp-WRKY6-DAP-Seq(GSE60143)/Homer	NCGTTGACTWWD	1e-09	-22.36	0	198	0.0797	2351.5	0.05
Gata4(Zf)/Heart-Gata4-ChIP-Seq(GSE35151)/Homer	NBWGATAAGR	1e-09	-22.09	0	219	0.0882	2679.5	0.057
WRKY55(WRKY)/col-WRKY55-DAP-Seq(GSE60143)/Homer	NCGTTGACTT	1e-09	-22.08	0	259	0.1043	3301.8	0.0702
Elk1(ETS)/Hela-Elk1-ChIP-Seq(GSE31477)/Homer	HACTTCCGGY	1e-09	-21.68	0	292	0.1176	3839.3	0.0816
FOXA1(Forkhead)/LNCAP-FOXA1-ChIP-Seq(GSE27824)/Homer	WAAGTAAACA	1e-09	-21.6	0	246	0.099	3114.5	0.0662
WRKY28(WRKY)/col-WRKY28-DAP-Seq(GSE60143)/Homer	BGTTGACTWH	1e-09	-21.5	0	274	0.1103	3559.3	0.0756
WRKY71(WRKY)/col-WRKY71-DAP-Seq(GSE60143)/Homer	CKTTGACYWW	1e-09	-21.12	0	175	0.0705	2042.6	0.0434
WRKY50(WRKY)/col-WRKY50-DAP-Seq(GSE60143)/Homer	NNTTGACTWNNGNNN	1e-09	-20.87	0	231	0.093	2905.4	0.0618
ELF3(ETS)/PDAC-ELF3-ChIP-Seq(GSE64557)/Homer	ANCAGGAAGT	1e-09	-20.83	0	243	0.0978	3094.9	0.0658
WRKY18(WRKY)/col-WRKY18-DAP-Seq(GSE60143)/Homer	NNNTTGACYWNNNNN	1e-09	-20.82	0	373	0.1502	5194.7	0.1104
EWS:FLI1-fusion(ETS)/SK_N_MC-EWS:FLI1-ChIP-Seq(SRA014231)/Homer	VACAGGAAAT	1e-08	-20.72	0	237	0.0954	3004.9	0.0639
VDR(NR),DR3/GM10855-VDR+vitD-ChIP-Seq(GSE22484)/Homer	ARAGGTCANWGAGTTCANNN	1e-08	-19.99	0	86	0.0346	805.5	0.0171
Usf2(bHLH)/C2C12-Usf2-ChIP-Seq(GSE36030)/Homer	GTCACGTGGT	1e-08	-19.93	0	127	0.0511	1371	0.0291
ETS(ETS)/Promoter/Homer	AACCGGAAGT	1e-08	-19.87	0	181	0.0729	2169.7	0.0461
CEBP:AP1(bZIP)/ThioMac-CEBPb-ChIP-Seq(GSE21512)/Homer	DRTGTTGCAA	1e-08	-19.64	0	182	0.0733	2191.1	0.0466
Foxo1(Forkhead)/RAW-Foxo1-ChIP-Seq(Fan_et_al.)/Homer	CTGTTTAC	1e-08	-19.39	0	500	0.2013	7408.3	0.1575
ELF1(ETS)/Jurkat-ELF1-ChIP-Seq(SRA014231)/Homer	AVCCGGAAGT	1e-08	-19.23	0	266	0.1071	3519.8	0.0748
Fox:Ebox(Forkhead,bHLH)/Panc1-Foxa2-ChIP-Seq(GSE47459)/Homer	NNNVCTGWGYAAACASN	1e-08	-18.44	0	256	0.1031	3390.7	0.0721
Chop(bZIP)/MEF-Chop-ChIP-Seq(GSE35681)/Homer	ATTGCATCAT	1e-07	-18.23	0	60	0.0242	501.1	0.0107
ELF5(ETS)/T47D-ELF5-ChIP-Seq(GSE30407)/Homer	ACVAGGAAGT	1e-07	-18.04	0	256	0.1031	3407	0.0724
At1g49010(MYBrelated)/col-At1g49010-DAP-Seq(GSE60143)/Homer	RGATAASNTT	1e-07	-17.81	0	362	0.1457	5156	0.1096
CTCF(Zf)/CD4+-CTCF-ChIP-Seq(Barski_et_al.)/Homer	AYAGTGCCMYCTRGTGGCCA	1e-07	-17.46	0	73	0.0294	679.7	0.0144
WRKY31(WRKY)/colamp-WRKY31-DAP-Seq(GSE60143)/Homer	NCGTTGACTWWK	1e-07	-17.41	0	159	0.064	1911.8	0.0406
Hnf1(Homeobox)/Liver-Foxa2-Chip-Seq(GSE25694)/Homer	GGTTAAWCATTAA	1e-07	-17.32	0	29	0.0117	162.1	0.0034
WRKY15(WRKY)/col-WRKY15-DAP-Seq(GSE60143)/Homer	VGTTGACTWW	1e-07	-17.25	0	210	0.0845	2705.7	0.0575
WRKY29(WRKY)/colamp-WRKY29-DAP-Seq(GSE60143)/Homer	MGTTGACTTT	1e-07	-17.1	0	213	0.0857	2758.8	0.0586
CLOCK(bHLH)/Liver-Clock-ChIP-Seq(GSE39860)/Homer	GHCACGTG	1e-07	-17	0	203	0.0817	2604.5	0.0554
WRKY25(WRKY)/colamp-WRKY25-DAP-Seq(GSE60143)/Homer	NNNNHRGTCAAMNNN	1e-07	-16.94	0	231	0.093	3050.6	0.0648
FOXP1(Forkhead)/H9-FOXP1-ChIP-Seq(GSE31006)/Homer	NYYTGTTTACHN	1e-07	-16.82	0	103	0.0415	1103.5	0.0235
ANAC046(NAC)/colamp-ANAC046-DAP-Seq(GSE60143)/Homer	ACACGYWAYC	1e-07	-16.79	0	448	0.1804	6665.8	0.1417
WRKY20(WRKY)/col-WRKY20-DAP-Seq(GSE60143)/Homer	CKTTGACYWD	1e-07	-16.78	0	170	0.0684	2099.8	0.0446
Atf4(bZIP)/MEF-Atf4-ChIP-Seq(GSE35681)/Homer	MTGATGCAAT	1e-07	-16.67	0	72	0.029	680.3	0.0145
USF1(bHLH)/GM12878-Usf1-ChIP-Seq(GSE32465)/Homer	SGTCACGTGR	1e-07	-16.66	0	175	0.0705	2180.7	0.0463
WRKY75(WRKY)/col-WRKY75-DAP-Seq(GSE60143)/Homer	CGTTGACTWW	1e-07	-16.56	0	201	0.0809	2589.9	0.055
HNF6(Homeobox)/Liver-Hnf6-ChIP-Seq(ERP000394)/Homer	NTATYGATCH	1e-07	-16.25	0	110	0.0443	1217.2	0.0259
EHF(ETS)/LoVo-EHF-ChIP-Seq(GSE49402)/Homer	AVCAGGAAGT	1e-06	-16.11	0	409	0.1647	6038.4	0.1283
FOXA1(Forkhead)/MCF7-FOXA1-ChIP-Seq(GSE26831)/Homer	WAAGTAAACA	1e-06	-16.01	0	191	0.0769	2452.6	0.0521
Cux2(Homeobox)/Liver-Cux2-ChIP-Seq(GSE35985)/Homer	HNRAATCAAT	1e-06	-15.98	0	90	0.0362	939.3	0.02
AARE(HLH)/mES-cMyc-ChIP-Seq/Homer	GATTGCATCA	1e-06	-15.83	0	33	0.0133	216	0.0046
Elk4(ETS)/Hela-Elk4-ChIP-Seq(GSE31477)/Homer	NRYTTCCGGY	1e-06	-15.77	0	279	0.1123	3878.9	0.0824
ATAF1(NAC)/col-ATAF1-DAP-Seq(GSE60143)/Homer	YACGTMAY	1e-06	-15.33	0	704	0.2834	11253.2	0.2392
PU.1(ETS)/ThioMac-PU.1-ChIP-Seq(GSE21512)/Homer	AGAGGAAGTG	1e-06	-14.44	0	174	0.07	2243.6	0.0477
SF1(NR)/H295R-Nr5a1-ChIP-Seq(GSE44220)/Homer	CAAGGHCANV	1e-06	-14.41	0	190	0.0765	2497.3	0.0531
NAM(NAC)/col-NAM-DAP-Seq(GSE60143)/Homer	RGTTRCGTRW	1e-06	-14.35	0	311	0.1252	4479.6	0.0952
Nr5a2(NR)/Pancreas-LRH1-ChIP-Seq(GSE34295)/Homer	BTCAAGGTCA	1e-06	-14.27	0	268	0.1079	3769	0.0801
FOXK1(Forkhead)/HEK293-FOXK1-ChIP-Seq(GSE51673)/Homer	NVWTGTTTAC	1e-06	-14	0	202	0.0813	2705.5	0.0575
WRKY14(WRKY)/colamp-WRKY14-DAP-Seq(GSE60143)/Homer	NCGTTGACTTTN	1e-06	-13.95	0	107	0.0431	1234.8	0.0262
WRKY24(WRKY)/colamp-WRKY24-DAP-Seq(GSE60143)/Homer	CGTTGACTWW	1e-05	-13.61	0	177	0.0713	2322.3	0.0494
WRKY33(WRKY)/col-WRKY33-DAP-Seq(GSE60143)/Homer	CGTTGACYAW	1e-05	-13.51	0	170	0.0684	2215.3	0.0471
Foxf1(Forkhead)/Lung-Foxf1-ChIP-Seq(GSE77951)/Homer	WWATRTAAACAN	1e-05	-13.5	0	160	0.0644	2058.7	0.0438
Fra2(bZIP)/Striatum-Fra2-ChIP-Seq(GSE43429)/Homer	GGATGACTCATC	1e-05	-13.35	0	125	0.0503	1522.2	0.0324
NF1(CTF)/LNCAP-NF1-ChIP-Seq(Unpublished)/Homer	CYTGGCABNSTGCCAR	1e-05	-13.15	0	146	0.0588	1852.5	0.0394
FOXK2(Forkhead)/U2OS-FOXK2-ChIP-Seq(E-MTAB-2204)/Homer	SCHTGTTTACAT	1e-05	-13.05	0	139	0.056	1747	0.0371
BMYB(HTH)/Hela-BMYB-ChIP-Seq(GSE27030)/Homer	NHAACBGYYV	1e-05	-13.04	0	409	0.1647	6223.9	0.1323
WRKY3(WRKY)/col-WRKY3-DAP-Seq(GSE60143)/Homer	NCKTTGACYDDN	1e-05	-12.83	0	131	0.0527	1631.4	0.0347
WRKY26(WRKY)/colamp-WRKY26-DAP-Seq(GSE60143)/Homer	CGTTGACTWDKN	1e-05	-12.61	0	121	0.0487	1485.2	0.0316
At5g08520(MYBrelated)/colamp-At5g08520-DAP-Seq(GSE60143)/Homer	ADBSTTATCY	1e-05	-12.58	0	220	0.0886	3060.1	0.065
WRKY43(WRKY)/colamp-WRKY43-DAP-Seq(GSE60143)/Homer	NCGTTGACTTTT	1e-05	-12.38	0	78	0.0314	853.3	0.0181
RORg(NR)/Liver-Rorc-ChIP-Seq(GSE101115)/Homer	WAABTAGGTCAV	1e-05	-12.06	0.0001	34	0.0137	270.5	0.0057
NAP(NAC)/col-NAP-DAP-Seq(GSE60143)/Homer	ARGTTACGTRTN	1e-05	-11.83	0.0001	211	0.0849	2948.2	0.0627
Atf3(bZIP)/GBM-ATF3-ChIP-Seq(GSE33912)/Homer	DATGASTCATHN	1e-05	-11.75	0.0001	158	0.0636	2094.4	0.0445
NF1-halfsite(CTF)/LNCaP-NF1-ChIP-Seq(Unpublished)/Homer	YTGCCAAG	1e-05	-11.67	0.0001	562	0.2262	9006.5	0.1914
Foxo3(Forkhead)/U2OS-Foxo3-ChIP-Seq(E-MTAB-2701)/Homer	DGTAAACA	1e-05	-11.56	0.0001	142	0.0572	1848.8	0.0393
CEBP(bZIP)/ThioMac-CEBPb-ChIP-Seq(GSE21512)/Homer	ATTGCGCAAC	0.0001	-11.35	0.0001	129	0.0519	1652.5	0.0351
At1g78700(BZR)/col-At1g78700-DAP-Seq(GSE60143)/Homer	NNNNCACGTGNNNNN	0.0001	-11.29	0.0001	113	0.0455	1406.1	0.0299
JunB(bZIP)/DendriticCells-Junb-ChIP-Seq(GSE36099)/Homer	RATGASTCAT	0.0001	-11.26	0.0001	133	0.0535	1718.7	0.0365
Reverb(NR),DR2/RAW-Reverba.biotin-ChIP-Seq(GSE45914)/Homer	GTRGGTCASTGGGTCA	0.0001	-10.96	0.0002	58	0.0233	603.7	0.0128
ETS:E-box(ETS,bHLH)/HPC7-Scl-ChIP-Seq(GSE22178)/Homer	AGGAARCAGCTG	0.0001	-10.86	0.0002	38	0.0153	337.7	0.0072
THRb(NR)/HepG2-THRb.Flag-ChIP-Seq(Encode)/Homer	GGTCACCTGAGGTCA	0.0001	-10.63	0.0002	212	0.0853	3024.8	0.0643
Nr5a2(NR)/mES-Nr5a2-ChIP-Seq(GSE19019)/Homer	BTCAAGGTCA	0.0001	-10.62	0.0002	203	0.0817	2876.4	0.0611
FoxL2(Forkhead)/Ovary-FoxL2-ChIP-Seq(GSE60858)/Homer	WWTRTAAACAVG	0.0001	-10.6	0.0002	144	0.058	1918.9	0.0408
BIM2(bHLH)/col-BIM2-DAP-Seq(GSE60143)/Homer	NNNNCACGTGNN	0.0001	-10.45	0.0003	244	0.0982	3568.5	0.0758
BORIS(Zf)/K562-CTCFL-ChIP-Seq(GSE32465)/Homer	CNNBRGCGCCCCCTGSTGGC	0.0001	-10.41	0.0003	112	0.0451	1421.2	0.0302
PHA-4(Forkhead)/cElegans-Embryos-PHA4-ChIP-Seq(modEncode)/Homer	KTGTTTGC	0.0001	-10.33	0.0003	693	0.279	11475.2	0.2439
Pho4(bHLH)/Yeast-Pho4-ChIP-Seq(GSE29506)/Homer	AAGCACGTGBGD	0.0001	-10.2	0.0003	83	0.0334	985.3	0.0209
GATA:SCL(Zf,bHLH)/Ter119-SCL-ChIP-Seq(GSE18720)/Homer	CRGCTGBNGNSNNSAGATAA	0.0001	-10.07	0.0004	39	0.0157	363.6	0.0077
WRKY65(WRKY)/colamp-WRKY65-DAP-Seq(GSE60143)/Homer	AWWWAGTCAACG	0.0001	-10.04	0.0004	96	0.0386	1187.9	0.0252
At5g58900(MYBrelated)/colamp-At5g58900-DAP-Seq(GSE60143)/Homer	WWWTYTTATCTWWWW	0.0001	-9.92	0.0004	208	0.0837	2995	0.0637
Fosl2(bZIP)/3T3L1-Fosl2-ChIP-Seq(GSE56872)/Homer	NATGASTCABNN	0.0001	-9.899	0.0004	90	0.0362	1100.4	0.0234
AP-1(bZIP)/ThioMac-PU.1-ChIP-Seq(GSE21512)/Homer	VTGACTCATC	0.0001	-9.789	0.0005	172	0.0692	2407.2	0.0512
At4g36780(BZR)/col-At4g36780-DAP-Seq(GSE60143)/Homer	NNNNNNCACGTGNNN	0.0001	-9.772	0.0005	110	0.0443	1413.8	0.03
WRKY22(WRKY)/colamp-WRKY22-DAP-Seq(GSE60143)/Homer	WWAAAGTCAACK	0.0001	-9.708	0.0005	118	0.0475	1541.3	0.0328
Fra1(bZIP)/BT549-Fra1-ChIP-Seq(GSE46166)/Homer	NNATGASTCATH	0.0001	-9.356	0.0007	127	0.0511	1698.6	0.0361
ANAC038(NAC)/col-ANAC038-DAP-Seq(GSE60143)/Homer	ACACGTWAYC	0.0001	-9.305	0.0007	481	0.1936	7763.6	0.165
bHLHE40(bHLH)/HepG2-BHLHE40-ChIP-Seq(GSE31477)/Homer	KCACGTGMCN	0.001	-9.166	0.0008	123	0.0495	1643	0.0349
SPDEF(ETS)/VCaP-SPDEF-ChIP-Seq(SRA014231)/Homer	ASWTCCTGBT	0.001	-9.115	0.0009	335	0.1349	5211.7	0.1108
BATF(bZIP)/Th17-BATF-ChIP-Seq(GSE39756)/Homer	DATGASTCAT	0.001	-9.109	0.0009	150	0.0604	2080.9	0.0442
RAR:RXR(NR),DR5/ES-RAR-ChIP-Seq(GSE56893)/Homer	RGGTCADNNAGAGGTCAV	0.001	-9.052	0.0009	17	0.0068	110.9	0.0024
SPCH(bHLH)/Seedling-SPCH-ChIP-Seq(GSE57497)/Homer	WNBCACGTGA	0.001	-9.052	0.0009	309	0.1244	4765.5	0.1013
At3g11280(MYBrelated)/col-At3g11280-DAP-Seq(GSE60143)/Homer	GATAAGRT	0.001	-8.685	0.0013	157	0.0632	2215.8	0.0471
AMYB(HTH)/Testes-AMYB-ChIP-Seq(GSE44588)/Homer	TGGCAGTTGG	0.001	-8.646	0.0013	427	0.1719	6862.1	0.1458
PQM-1(?)/cElegans-L3-ChIP-Seq(modEncode)/Homer	ACTGATAAGA	0.001	-8.632	0.0013	68	0.0274	807.7	0.0172
At5g05790(MYBrelated)/col-At5g05790-DAP-Seq(GSE60143)/Homer	AYCTTATC	0.001	-8.495	0.0015	162	0.0652	2307.2	0.049
HIC1(Zf)/Treg-ZBTB29-ChIP-Seq(GSE99889)/Homer	TGCCAGCB	0.001	-8.467	0.0016	728	0.2931	12300.9	0.2614
HNF1b(Homeobox)/PDAC-HNF1B-ChIP-Seq(GSE64557)/Homer	GTTAATNATTAA	0.001	-8.446	0.0016	25	0.0101	210	0.0045
WRKY40(WRKY)/colamp-WRKY40-DAP-Seq(GSE60143)/Homer	AHWAGTCAAC	0.001	-8.434	0.0016	121	0.0487	1641.9	0.0349
bHLH34(bHLH)/colamp-bHLH34-DAP-Seq(GSE60143)/Homer	HGWGRHWGACACGTG	0.001	-8.382	0.0017	98	0.0395	1277.3	0.0271
HIF-1b(HLH)/T47D-HIF1b-ChIP-Seq(GSE59937)/Homer	RTACGTGC	0.001	-8.344	0.0017	390	0.157	6234.6	0.1325
E-box/Arabidopsis-Promoters/Homer	GCCACGTG	0.001	-7.881	0.0027	163	0.0656	2356.7	0.0501
AT5G56840(MYBrelated)/colamp-AT5G56840-DAP-Seq(GSE60143)/Homer	TGGATAAGGT	0.001	-7.855	0.0028	218	0.0878	3284.3	0.0698
THRa(NR)/C17.2-THRa-ChIP-Seq(GSE38347)/Homer	GGTCANYTGAGGWCA	0.001	-7.805	0.0029	139	0.056	1963.8	0.0417
BAM8(BES1)/col-BAM8-DAP-Seq(GSE60143)/Homer	NNWSACACGTGTSWN	0.001	-7.756	0.003	54	0.0217	624.7	0.0133
Tcf7(HMG)/GM12878-TCF7-ChIP-Seq(Encode)/Homer	CTTTGATGTGSB	0.001	-7.749	0.003	82	0.033	1050.5	0.0223
Atf1(bZIP)/K562-ATF1-ChIP-Seq(GSE31477)/Homer	GATGACGTCA	0.001	-7.658	0.0033	175	0.0705	2569.5	0.0546
FEA4(bZIP)/Corn-FEA4-ChIP-Seq(GSE61954)/Homer	TGACGTCACS	0.001	-7.594	0.0035	308	0.124	4856.1	0.1032
ERE(NR),IR3/MCF7-ERa-ChIP-Seq(Unpublished)/Homer	VAGGTCACNSTGACC	0.001	-7.385	0.0042	97	0.039	1301.6	0.0277
Zac1(Zf)/Neuro2A-Plagl1-ChIP-Seq(GSE75942)/Homer	HAWGRGGCCM	0.001	-7.307	0.0045	874	0.3519	15121.5	0.3214
RORgt(NR)/EL4-RORgt.Flag-ChIP-Seq(GSE56019)/Homer	AAYTAGGTCA	0.001	-7.272	0.0046	39	0.0157	419.3	0.0089
RORgt(NR)/EL4-RORgt.Flag-ChIP-Seq(GSE56019)/Homer	AAYTAGGTCA	0.001	-7.272	0.0046	39	0.0157	419.3	0.0089
PIF7(bHLH)/col-PIF7-DAP-Seq(GSE60143)/Homer	CCACGTGGNH	0.001	-7.096	0.0055	74	0.0298	949	0.0202
MITF(bHLH)/MastCells-MITF-ChIP-Seq(GSE48085)/Homer	RTCATGTGAC	0.001	-7.063	0.0056	253	0.1019	3940.7	0.0838
Twist(bHLH)/HMLE-TWIST1-ChIP-Seq(Chang_et_al)/Homer	VCAKCTGGNNNCCAGMTGBN	0.001	-7.059	0.0056	52	0.0209	614.5	0.0131
At5g47390(MYBrelated)/col-At5g47390-DAP-Seq(GSE60143)/Homer	CTTATCCA	0.001	-6.997	0.006	228	0.0918	3513.5	0.0747
HY5(bZIP)/colamp-HY5-DAP-Seq(GSE60143)/Homer	RRTSACGTSD	0.01	-6.906	0.0065	226	0.091	3485.9	0.0741
bHLH74(bHLH)/col-bHLH74-DAP-Seq(GSE60143)/Homer	DRATCACGTGAB	0.01	-6.821	0.007	95	0.0382	1293.6	0.0275
Cbf1(bHLH)/Yeast-Cbf1-ChIP-Seq(GSE29506)/Homer	TCACGTGAYH	0.01	-6.771	0.0073	93	0.0374	1263.8	0.0269
RKD2(RWPRK)/colamp-RKD2-DAP-Seq(GSE60143)/Homer	GACKTTTCRDCTTCC	0.01	-6.763	0.0073	171	0.0688	2555.2	0.0543
ANAC045(NAC)/col-ANAC045-DAP-Seq(GSE60143)/Homer	DNCKTVNNNNNNAMG	0.01	-6.741	0.0074	494	0.1989	8240.8	0.1752
ANAC047(NAC)/colamp-ANAC047-DAP-Seq(GSE60143)/Homer	WACACGTAACTT	0.01	-6.713	0.0076	151	0.0608	2221.9	0.0472
Bach2(bZIP)/OCILy7-Bach2-ChIP-Seq(GSE44420)/Homer	TGCTGAGTCA	0.01	-6.617	0.0083	57	0.0229	703.4	0.015
LXRE(NR),DR4/RAW-LXRb.biotin-ChIP-Seq(GSE21512)/Homer	RGGTTACTANAGGTCA	0.01	-6.463	0.0096	19	0.0076	164.9	0.0035
HIF-1a(bHLH)/MCF7-HIF1a-ChIP-Seq(GSE28352)/Homer	TACGTGCV	0.01	-6.439	0.0098	95	0.0382	1310.8	0.0279
bZIP52(bZIP)/colamp-bZIP52-DAP-Seq(GSE60143)/Homer	NDNHCAGCTGTCANN	0.01	-6.423	0.0099	370	0.149	6051.5	0.1286
MYB(HTH)/ERMYB-Myb-ChIPSeq(GSE22095)/Homer	GGCVGTTR	0.01	-6.404	0.01	485	0.1952	8114.7	0.1725
RAR:RXR(NR),DR5/ES-RAR-ChIP-Seq(GSE56893)/Homer	AGGTCAAGGTCA	0.01	-6.359	0.0104	69	0.0278	898.6	0.0191
GT2(Trihelix)/colamp-GT2-DAP-Seq(GSE60143)/Homer	AMGGTAAAWWWN	0.01	-6.324	0.0107	136	0.0548	1992.5	0.0423
ZFX(Zf)/mES-Zfx-ChIP-Seq(GSE11431)/Homer	AGGCCTRG	0.01	-6.251	0.0115	448	0.1804	7464.2	0.1586
FXR(NR),IR1/Liver-FXR-ChIP-Seq(Chong_et_al.)/Homer	AGGTCANTGACCTB	0.01	-6.17	0.0124	128	0.0515	1867.1	0.0397
Tlx?(NR)/NPC-H3K4me1-ChIP-Seq(GSE16256)/Homer	CTGGCAGSCTGCCA	0.01	-6.113	0.013	150	0.0604	2240.1	0.0476
GBF5(bZIP)/colamp-GBF5-DAP-Seq(GSE60143)/Homer	WKNWSACGTGGCAWN	0.01	-6.074	0.0134	87	0.035	1197.9	0.0255
Unknown5/Drosophila-Promoters/Homer	GCTGATAASV	0.01	-5.909	0.0158	137	0.0552	2033.3	0.0432
WRKY47(WRKY)/colamp-WRKY47-DAP-Seq(GSE60143)/Homer	WAAGTCAACGBT	0.01	-5.9	0.0158	60	0.0242	774.8	0.0165
RORa(NR)/Liver-Rora-ChIP-Seq(GSE101115)/Homer	AAWCTAGGTCARDNN	0.01	-5.883	0.016	39	0.0157	454.3	0.0097
Atoh1(bHLH)/Cerebellum-Atoh1-ChIP-Seq(GSE22111)/Homer	VNRVCAGCTGGY	0.01	-5.732	0.0185	336	0.1353	5513.2	0.1172
WRKY45(WRKY)/col-WRKY45-DAP-Seq(GSE60143)/Homer	HNNNKTTGACTWWNH	0.01	-5.723	0.0186	62	0.025	812.8	0.0173
PIF5ox(bHLH)/Arabidopsis-PIF5ox-ChIP-Seq(GSE35062)/Homer	BCACGTGVDN	0.01	-5.651	0.0198	280	0.1127	4528.3	0.0962
ANAC079(NAC)/colamp-ANAC079-DAP-Seq(GSE60143)/Homer	TACACGCAACCT	0.01	-5.65	0.0198	91	0.0366	1282.4	0.0273
AP-2alpha(AP2)/Hela-AP2alpha-ChIP-Seq(GSE31477)/Homer	ATGCCCTGAGGC	0.01	-5.579	0.0211	317	0.1276	5190.6	0.1103
MYB101(MYB)/colamp-MYB101-DAP-Seq(GSE60143)/Homer	TAACNRMY	0.01	-5.578	0.0211	443	0.1783	7448.5	0.1583
WRKY42(WRKY)/colamp-WRKY42-DAP-Seq(GSE60143)/Homer	NAAAGTCAACGN	0.01	-5.487	0.0228	79	0.0318	1094.5	0.0233
bZIP48(bZIP)/colamp-bZIP48-DAP-Seq(GSE60143)/Homer	DDWWKVTSACGTGGC	0.01	-5.416	0.0244	92	0.037	1310.6	0.0279
NPAS2(bHLH)/Liver-NPAS2-ChIP-Seq(GSE39860)/Homer	KCCACGTGAC	0.01	-5.378	0.0252	321	0.1292	5282	0.1123
ABF1(bZIP)/Arabidopsis-ABF1-ChIP-Seq(GSE80564)/Homer	CACGTGGC	0.01	-5.22	0.0293	270	0.1087	4391.2	0.0933
ATHB25(ZFHD)/colamp-ATHB25-DAP-Seq(GSE60143)/Homer	TAATTAVB	0.01	-5.21	0.0294	153	0.0616	2350.7	0.05
bZIP68(bZIP)/col-bZIP68-DAP-Seq(GSE60143)/Homer	WGCCACGTGK	0.01	-5.149	0.0311	99	0.0399	1440.3	0.0306
GTL1(Trihelix)/colamp-GTL1-DAP-Seq(GSE60143)/Homer	WWTTTACCKY	0.01	-5.143	0.0311	155	0.0624	2389	0.0508
SeqBias: polyA-repeat	AAAAAAAAAA	0.01	-5.136	0.0312	2358	0.9493	44091.1	0.9371
AT5G61620(MYBrelated)/colamp-AT5G61620-DAP-Seq(GSE60143)/Homer	CTTATCCA	0.01	-5.129	0.0313	256	0.1031	4152.8	0.0883
At1g75490(AP2EREBP)/colamp-At1g75490-DAP-Seq(GSE60143)/Homer	CACCGMCT	0.01	-5.108	0.0317	560	0.2254	9632.3	0.2047
TEAD4(TEA)/Tropoblast-Tead4-ChIP-Seq(GSE37350)/Homer	CCWGGAATGY	0.01	-5.079	0.0325	195	0.0785	3086.2	0.0656
At1g19210(AP2EREBP)/colamp-At1g19210-DAP-Seq(GSE60143)/Homer	HCACCGACCAHN	0.01	-5.072	0.0325	374	0.1506	6262.1	0.1331
ABI5(bZIP)/col-ABI5-DAP-Seq(GSE60143)/Homer	GCCACGTG	0.01	-5.065	0.0326	130	0.0523	1967	0.0418
At5g22890(C2H2)/col-At5g22890-DAP-Seq(GSE60143)/Homer	NSAGGTKWTATCTGD	0.01	-5.037	0.0333	11	0.0044	85.2	0.0018
PR(NR)/T47D-PR-ChIP-Seq(GSE31130)/Homer	VAGRACAKNCTGTBC	0.01	-4.923	0.0372	567	0.2283	9785.9	0.208
bZIP18(bZIP)/colamp-bZIP18-DAP-Seq(GSE60143)/Homer	KGMCAGCTND	0.01	-4.888	0.0383	1550	0.624	28228	0.6
c-Jun-CRE(bZIP)/K562-cJun-ChIP-Seq(GSE31477)/Homer	ATGACGTCATCY	0.01	-4.858	0.0393	81	0.0326	1157.2	0.0246
SND3(NAC)/col-SND3-DAP-Seq(GSE60143)/Homer	CTTNHNNNDNAAGNH	0.01	-4.854	0.0393	141	0.0568	2169.7	0.0461
MYB81(MYB)/col-MYB81-DAP-Seq(GSE60143)/Homer	NWAACSGWTWNN	0.01	-4.85	0.0393	276	0.1111	4533.8	0.0964
AP-2gamma(AP2)/MCF7-TFAP2C-ChIP-Seq(GSE21234)/Homer	SCCTSAGGSCAW	0.01	-4.846	0.0393	405	0.163	6847.4	0.1455
ZNF317(Zf)/HEK293-ZNF317.GFP-ChIP-Seq(GSE58341)/Homer	GTCWGCTGTYYCTCT	0.01	-4.775	0.0418	30	0.0121	351.8	0.0075
ANAC070(NAC)/colamp-ANAC070-DAP-Seq(GSE60143)/Homer	CTTRHDNHNBAAGHW	0.01	-4.769	0.0418	204	0.0821	3269.6	0.0695
At4g18890(BZR)/col-At4g18890-DAP-Seq(GSE60143)/Homer	NDBRCACGTGYR	0.01	-4.764	0.0418	61	0.0246	835.9	0.0178
WRKY11(WRKY)/col-WRKY11-DAP-Seq(GSE60143)/Homer	SCGTTGACTTTN	0.01	-4.727	0.0432	27	0.0109	308.4	0.0066
SMB(NAC)/colamp-SMB-DAP-Seq(GSE60143)/Homer	CTTVNNNNDBAAGHW	0.01	-4.71	0.0437	179	0.0721	2837.7	0.0603
Olig2(bHLH)/Neuron-Olig2-ChIP-Seq(GSE30882)/Homer	RCCATMTGTT	0.01	-4.692	0.0443	505	0.2033	8683.8	0.1846
EMB1789(C3H)/col-EMB1789-DAP-Seq(GSE60143)/Homer	TWTTTACCGYND	0.01	-4.663	0.0454	58	0.0233	791.6	0.0168
AT1G76880(Trihelix)/col-AT1G76880-DAP-Seq(GSE60143)/Homer	ACGGTAAAAW	0.01	-4.643	0.0461	45	0.0181	585	0.0124
Jun-AP1(bZIP)/K562-cJun-ChIP-Seq(GSE31477)/Homer	GATGASTCATCN	0.01	-4.62	0.0469	59	0.0238	809.4	0.0172
Tcf21(bHLH)/ArterySmoothMuscle-Tcf21-ChIP-Seq(GSE61369)/Homer	NAACAGCTGG	0.1	-4.605	0.0474	301	0.1212	5004.3	0.1064
ABF2(bZIP)/col-ABF2-DAP-Seq(GSE60143)/Homer	KGMCACGTGDCMHHH	0.1	-4.598	0.0475	64	0.0258	891.1	0.0189
bHLHE41(bHLH)/proB-Bhlhe41-ChIP-Seq(GSE93764)/Homer	KCACGTGMCN	0.1	-4.593	0.0475	398	0.1602	6751.6	0.1435
NeuroG2(bHLH)/Fibroblast-NeuroG2-ChIP-Seq(GSE75910)/Homer	ACCATCTGTT	0.1	-4.525	0.0506	420	0.1691	7158.3	0.1521
E2F(E2F)/Hela-CellCycle-Expression/Homer	TTSGCGCGAAAA	0.1	-4.493	0.052	28	0.0113	329.9	0.007
ATHB24(ZFHD)/colamp-ATHB24-DAP-Seq(GSE60143)/Homer	TAATTAAS	0.1	-4.4	0.0568	102	0.0411	1534.8	0.0326
NF-E2(bZIP)/K562-NFE2-ChIP-Seq(GSE31477)/Homer	GATGACTCAGCA	0.1	-4.383	0.0575	17	0.0068	173.9	0.0037
PAX5(Paired,Homeobox),condensed/GM12878-PAX5-ChIP-Seq(GSE32465)/Homer	GTCACGCTCSCTGM	0.1	-4.367	0.0582	42	0.0169	548.5	0.0117
MYB65(MYB)/colamp-MYB65-DAP-Seq(GSE60143)/Homer	RACNGTTA	0.1	-4.341	0.0594	232	0.0934	3802.4	0.0808
GT3a(Trihelix)/col-GT3a-DAP-Seq(GSE60143)/Homer	WNACACGTGTYWWAW	0.1	-4.275	0.0631	37	0.0149	473.8	0.0101
ATHB23(ZFHD)/col-ATHB23-DAP-Seq(GSE60143)/Homer	HTAATTARNN	0.1	-4.198	0.0679	117	0.0471	1803.6	0.0383
Hand2(bHLH)/Mesoderm-Hand2-ChIP-Seq(GSE61475)/Homer	TGACANARRCCAGRC	0.1	-4.191	0.068	133	0.0535	2079	0.0442
Unknown-ESC-element(?)/mES-Nanog-ChIP-Seq(GSE11724)/Homer	CACAGCAGGGGG	0.1	-4.166	0.0695	196	0.0789	3182.6	0.0676
VND1(NAC)/col-VND1-DAP-Seq(GSE60143)/Homer	CTTRWDNHWYAAGYW	0.1	-4.119	0.0725	146	0.0588	2310.2	0.0491
bZIP16(bZIP)/colamp-bZIP16-DAP-Seq(GSE60143)/Homer	TGCCACGTGD	0.1	-4.069	0.0758	79	0.0318	1166.9	0.0248
VND6(NAC)/col-VND6-DAP-Seq(GSE60143)/Homer	DCTTNHTTTTYAMGY	0.1	-4.041	0.0776	223	0.0898	3672.3	0.0781
Bcl11a(Zf)/HSPC-BCL11A-ChIP-Seq(GSE104676)/Homer	TYTGACCASWRG	0.1	-4.038	0.0776	190	0.0765	3088.2	0.0656
VND2(NAC)/col-VND2-DAP-Seq(GSE60143)/Homer	DNCKTNNNNNNNAAG	0.1	-4.036	0.0776	180	0.0725	2912.9	0.0619
TCFL2(HMG)/K562-TCF7L2-ChIP-Seq(GSE29196)/Homer	ACWTCAAAGG	0.1	-4.031	0.0776	25	0.0101	297.6	0.0063
MYB70(MYB)/col-MYB70-DAP-Seq(GSE60143)/Homer	WTAACNGTTA	0.1	-4.027	0.0776	261	0.1051	4351.2	0.0925
AGL63(MADS)/col-AGL63-DAP-Seq(GSE60143)/Homer	TTCCAAWWWTGG	0.1	-4.027	0.0776	121	0.0487	1884.7	0.0401
BIM3(bHLH)/col-BIM3-DAP-Seq(GSE60143)/Homer	TWVTCACGTGAB	0.1	-3.978	0.0805	47	0.0189	643.9	0.0137
NTM1(NAC)/col-NTM1-DAP-Seq(GSE60143)/Homer	ACTTRTARAASAAGT	0.1	-3.974	0.0805	107	0.0431	1647.4	0.035
ATHB34(ZFHD)/colamp-ATHB34-DAP-Seq(GSE60143)/Homer	TRATTARS	0.1	-3.956	0.0816	105	0.0423	1614.3	0.0343
GATA(Zf),IR3/iTreg-Gata3-ChIP-Seq(GSE20898)/Homer	NNNNNBAGATAWYATCTVHN	0.1	-3.928	0.0835	26	0.0105	315.3	0.0067
ZNF652/HepG2-ZNF652.Flag-ChIP-Seq(Encode)/Homer	TTAACCCTTTVNKKN	0.1	-3.894	0.0861	49	0.0197	680	0.0145
ANAC042(NAC)/col-ANAC042-DAP-Seq(GSE60143)/Homer	CGTNDHNDHNACGKY	0.1	-3.872	0.0876	251	0.101	4189.3	0.089
PU.1:IRF8(ETS:IRF)/pDC-Irf8-ChIP-Seq(GSE66899)/Homer	GGAAGTGAAAST	0.1	-3.816	0.0923	47	0.0189	650.7	0.0138
Zic(Zf)/Cerebellum-ZIC1.2-ChIP-Seq(GSE60731)/Homer	CCTGCTGAGH	0.1	-3.812	0.0923	285	0.1147	4806.4	0.1022
Meis1(Homeobox)/MastCells-Meis1-ChIP-Seq(GSE48085)/Homer	VGCTGWCAVB	0.1	-3.803	0.0926	484	0.1948	8425.2	0.1791
c-Myc(bHLH)/LNCAP-cMyc-ChIP-Seq(Unpublished)/Homer	VCCACGTG	0.1	-3.785	0.0939	180	0.0725	2935.3	0.0624
EBF1(EBF)/Near-E2A-ChIP-Seq(GSE21512)/Homer	GTCCCCWGGGGA	0.1	-3.785	0.0939	336	0.1353	5730.3	0.1218
E-box/Drosophila-Promoters/Homer	AACAGCTGTTHN	0.1	-3.757	0.0958	69	0.0278	1016.3	0.0216
Nrf2(bZIP)/Lymphoblast-Nrf2-ChIP-Seq(GSE37589)/Homer	HTGCTGAGTCAT	0.1	-3.746	0.0964	15	0.006	158.9	0.0034
bZIP53(bZIP)/colamp-bZIP53-DAP-Seq(GSE60143)/Homer	NDNHSACGTGKMNNN	0.1	-3.708	0.0997	86	0.0346	1306.3	0.0278
SVP(MADS)/col-SVP-DAP-Seq(GSE60143)/Homer	ANTTWCCHAATTTGG	0.1	-3.693	0.1009	72	0.029	1070.5	0.0228
MYB73(MYB)/col-MYB73-DAP-Seq(GSE60143)/Homer	NNNNHAACNGHHDHN	0.1	-3.673	0.1025	332	0.1337	5672.5	0.1206
NST1(NAC)/colamp-NST1-DAP-Seq(GSE60143)/Homer	WRCTTRWWNWWYAAG	0.1	-3.67	0.1025	146	0.0588	2347	0.0499
IRF3(IRF)/BMDM-Irf3-ChIP-Seq(GSE67343)/Homer	AGTTTCAKTTTC	0.1	-3.649	0.104	59	0.0238	855	0.0182
MYB77(MYB)/col-MYB77-DAP-Seq(GSE60143)/Homer	NYAACBGYMC	0.1	-3.637	0.1049	327	0.1316	5586.1	0.1187
AREB3(bZIP)/col-AREB3-DAP-Seq(GSE60143)/Homer	NKGMCACGTGDCMNN	0.1	-3.598	0.1086	84	0.0338	1279.5	0.0272
Bach1(bZIP)/K562-Bach1-ChIP-Seq(GSE31477)/Homer	AWWNTGCTGAGTCAT	0.1	-3.597	0.1086	14	0.0056	147.2	0.0031
Tbr1(T-box)/Cortex-Tbr1-ChIP-Seq(GSE71384)/Homer	AAGGTGTKAA	0.1	-3.551	0.1129	272	0.1095	4603.1	0.0978
LHY(Myb)/Seedling-LHY-ChIP-Seq(GSE52175)/Homer	ADAAATATCT	0.1	-3.547	0.1129	127	0.0511	2025.3	0.043
Zic3(Zf)/mES-Zic3-ChIP-Seq(GSE37889)/Homer	GGCCYCCTGCTGDGH	0.1	-3.517	0.1159	223	0.0898	3727.3	0.0792
bZIP69(bZIP)/col-bZIP69-DAP-Seq(GSE60143)/Homer	GACAGCTGKCAW	0.1	-3.502	0.1171	39	0.0157	534.1	0.0114
Srebp2(bHLH)/HepG2-Srebp2-ChIP-Seq(GSE31477)/Homer	CGGTCACSCCAC	0.1	-3.487	0.1185	41	0.0165	567.6	0.0121
IRF8(IRF)/BMDM-IRF8-ChIP-Seq(GSE77884)/Homer	GRAASTGAAAST	0.1	-3.473	0.1197	72	0.029	1083	0.023
NFAT(RHD)/Jurkat-NFATC1-ChIP-Seq(Jolma_et_al.)/Homer	ATTTTCCATT	0.1	-3.463	0.1204	163	0.0656	2665.9	0.0567
Six2(Homeobox)/NephronProgenitor-Six2-ChIP-Seq(GSE39837)/Homer	GWAAYHTGAKMC	0.1	-3.441	0.1226	196	0.0789	3253.7	0.0692
MYB3R1(MYB)/col-MYB3R1-DAP-Seq(GSE60143)/Homer	WWDTDACCGTTR	0.1	-3.43	0.1234	50	0.0201	717	0.0152
Pdx1(Homeobox)/Islet-Pdx1-ChIP-Seq(SRA008281)/Homer	YCATYAATCA	0.1	-3.429	0.1234	149	0.06	2421.2	0.0515
DREB19(AP2EREBP)/colamp-DREB19-DAP-Seq(GSE60143)/Homer	AATGTCGGTK	0.1	-3.387	0.1279	146	0.0588	2372.9	0.0504
Atf7(bZIP)/3T3L1-Atf7-ChIP-Seq(GSE56872)/Homer	NGRTGACGTCAY	0.1	-3.382	0.1281	117	0.0471	1864.2	0.0396
WIP5(C2H2)/colamp-WIP5-DAP-Seq(GSE60143)/Homer	TDTTCTCMAGGT	0.1	-3.371	0.129	311	0.1252	5331.8	0.1133
Mef2a(MADS)/HL1-Mef2a.biotin-ChIP-Seq(GSE21529)/Homer	CYAAAAATAG	0.1	-3.315	0.1359	55	0.0221	806.2	0.0171
IRF1(IRF)/PBMC-IRF1-ChIP-Seq(GSE43036)/Homer	GAAAGTGAAAGT	0.1	-3.294	0.1382	26	0.0105	335.7	0.0071
JunD(bZIP)/K562-JunD-ChIP-Seq/Homer	ATGACGTCATCN	0.1	-3.268	0.1414	31	0.0125	415.5	0.0088
Tbx21(T-box)/GM12878-TBX21-ChIP-Seq(Encode)/Homer	AGGTGTGAAA	0.1	-3.267	0.1414	201	0.0809	3361.7	0.0715
bZIP3(bZIP)/col-bZIP3-DAP-Seq(GSE60143)/Homer	DWKNHSACGTGGCAD	0.1	-3.247	0.1432	121	0.0487	1945.9	0.0414
AT5G60130(ABI3VP1)/col-AT5G60130-DAP-Seq(GSE60143)/Homer	WTTYTAAGVAAA	0.1	-3.243	0.1432	269	0.1083	4587.2	0.0975
O2(bZIP)/Corn-O2-ChIP-Seq(GSE63991)/Homer	GCTGACGTGGCA	0.1	-3.232	0.1443	50	0.0201	727.9	0.0155
Trl(Zf)/S2-GAGAfactor-ChIP-Seq(GSE40646)/Homer	RGAGAGAG	0.1	-3.221	0.1453	834	0.3357	15014.7	0.3191
SpiB(ETS)/OCILY3-SPIB-ChIP-Seq(GSE56857)/Homer	AAAGRGGAAGTG	0.1	-3.193	0.1489	58	0.0233	863.2	0.0183
PIF4(bHLH)/Seedling-PIF4-ChIP-Seq(GSE35315)/Homer	NNBCACGTGN	0.1	-3.193	0.1489	316	0.1272	5446.1	0.1158
VND3(NAC)/colamp-VND3-DAP-Seq(GSE60143)/Homer	TRCTTGWDNHWCAAG	0.1	-3.186	0.1489	126	0.0507	2038.6	0.0433
Knotted(Homeobox)/Corn-KN1-ChIP-Seq(GSE39161)/Homer	GAYGNGACRGGN	0.1	-3.184	0.1489	408	0.1643	7127.4	0.1515
IBL1(bHLH)/Seedling-IBL1-ChIP-Seq(GSE51120)/Homer	CACGTGCC	0.1	-3.178	0.1489	624	0.2512	11112.4	0.2362
bZIP28(bZIP)/col-bZIP28-DAP-Seq(GSE60143)/Homer	TGCCACGTSABH	0.1	-3.171	0.1495	74	0.0298	1136.9	0.0242
Atf2(bZIP)/3T3L1-Atf2-ChIP-Seq(GSE56872)/Homer	NRRTGACGTCAT	0.1	-3.156	0.1512	85	0.0342	1326.8	0.0282
AZF1(C2H2)/colamp-AZF1-DAP-Seq(GSE60143)/Homer	DKSWCACT	0.1	-3.126	0.1552	1372	0.5523	25174.2	0.5351
AR-halfsite(NR)/LNCaP-AR-ChIP-Seq(GSE27824)/Homer	CCAGGAACAG	0.1	-3.096	0.1594	1065	0.4287	19375.1	0.4118
SPL11(SBP)/col100-SPL11-DAP-Seq(GSE60143)/Homer	YTGTACTTBH	0.1	-3.094	0.1594	119	0.0479	1923.5	0.0409
At1g36060(AP2EREBP)/colamp-At1g36060-DAP-Seq(GSE60143)/Homer	NNWWKGTCGGTG	0.1	-3.066	0.163	169	0.068	2811.4	0.0598
Unknown2/Drosophila-Promoters/Homer	CATCMCTA	0.1	-3.064	0.163	353	0.1421	6139.6	0.1305
CEJ1(AP2EREBP)/col-CEJ1-DAP-Seq(GSE60143)/Homer	WWTGTCGGTG	0.1	-3.059	0.163	250	0.1006	4267.9	0.0907
ANAC071(NAC)/col-ANAC071-DAP-Seq(GSE60143)/Homer	DNCKTNDNNNHNAAG	0.1	-3.058	0.163	158	0.0636	2617	0.0556
MYB33(MYB)/col-MYB33-DAP-Seq(GSE60143)/Homer	DDTYNGTTAN	0.1	-3.025	0.1675	303	0.122	5233.1	0.1112
GFX(?)/Promoter/Homer	ATTCTCGCGAGA	0.1	-2.987	0.1733	10	0.004	103.3	0.0022
GRE(NR),IR3/RAW264.7-GRE-ChIP-Seq(Unpublished)/Homer	VAGRACAKWCTGTYC	0.1	-2.972	0.1753	56	0.0225	842.2	0.0179
At1g19000(MYBrelated)/colamp-At1g19000-DAP-Seq(GSE60143)/Homer	WWTGGATAADDT	0.1	-2.97	0.1753	105	0.0423	1688.2	0.0359
NeuroD1(bHLH)/Islet-NeuroD1-ChIP-Seq(GSE30298)/Homer	GCCATCTGTT	0.1	-2.969	0.1753	228	0.0918	3881.7	0.0825
CUX1(Homeobox)/K562-CUX1-ChIP-Seq(GSE92882)/Homer	TATCGATNAN	0.1	-2.969	0.1753	94	0.0378	1496.1	0.0318
ZNF711(Zf)/SHSY5Y-ZNF711-ChIP-Seq(GSE20673)/Homer	AGGCCTAG	0.1	-2.952	0.1765	663	0.2669	11880.5	0.2525
ZNF519(Zf)/HEK293-ZNF519.GFP-ChIP-Seq(GSE58341)/Homer	GAGSCCGAGC	0.1	-2.942	0.1776	108	0.0435	1743	0.037
HLH-1(bHLH)/cElegans-Embryo-HLH1-ChIP-Seq(modEncode)/Homer	RACAGCTGTTBH	0.1	-2.94	0.1776	204	0.0821	3452.9	0.0734
Tgif1(Homeobox)/mES-Tgif1-ChIP-Seq(GSE55404)/Homer	YTGWCADY	0.1	-2.937	0.1776	718	0.289	12907.2	0.2743
AtHB32(ZFHD)/col200-AtHB32-DAP-Seq(GSE60143)/Homer	CGAATTAT	0.1	-2.935	0.1776	138	0.0556	2273.4	0.0483
VND4(NAC)/colamp-VND4-DAP-Seq(GSE60143)/Homer	WRCTTGWANWWCAAG	0.1	-2.918	0.1794	133	0.0535	2187	0.0465
AT1G19040(NAC)/col-AT1G19040-DAP-Seq(GSE60143)/Homer	CTTGNDNHNCAAGYW	0.1	-2.894	0.1831	31	0.0125	430.8	0.0092
ANAC028(NAC)/col-ANAC028-DAP-Seq(GSE60143)/Homer	WRCTTGNNNNNCAAG	0.1	-2.892	0.1831	135	0.0543	2224.8	0.0473
MYB98(MYB)/col-MYB98-DAP-Seq(GSE60143)/Homer	NWDCCGTTAC	0.1	-2.855	0.1891	54	0.0217	815.6	0.0173
WRKY8(WRKY)/colamp-WRKY8-DAP-Seq(GSE60143)/Homer	CGTTGACTTT	0.1	-2.849	0.1896	20	0.0081	256.3	0.0054
ANAC075(NAC)/col-ANAC075-DAP-Seq(GSE60143)/Homer	CTTSWWNWWSAAGYT	0.1	-2.766	0.2054	71	0.0286	1112.3	0.0236
ISRE(IRF)/ThioMac-LPS-Expression(GSE23622)/Homer	AGTTTCASTTTC	0.1	-2.744	0.2092	12	0.0048	137.4	0.0029
ANAC004(NAC)/colamp-ANAC004-DAP-Seq(GSE60143)/Homer	WNCTTVYNNNRBAAG	0.1	-2.734	0.2107	70	0.0282	1097.4	0.0233
PLT1(AP2EREBP)/colamp-PLT1-DAP-Seq(GSE60143)/Homer	GCACGAWTYCCGAGG	0.1	-2.722	0.2125	21	0.0085	276.5	0.0059
AT4G00250(GeBP)/col-AT4G00250-DAP-Seq(GSE60143)/Homer	WDTGGATAAKRT	0.1	-2.713	0.2137	80	0.0322	1272.3	0.027
NFE2L2(bZIP)/HepG2-NFE2L2-ChIP-Seq(Encode)/Homer	AWWWTGCTGAGTCAT	0.1	-2.701	0.2155	14	0.0056	168.1	0.0036
WRKY30(WRKY)/colamp-WRKY30-DAP-Seq(GSE60143)/Homer	CGTTGACTTN	0.1	-2.683	0.2188	59	0.0238	911.1	0.0194
Tcf3(HMG)/mES-Tcf3-ChIP-Seq(GSE11724)/Homer	ASWTCAAAGG	0.1	-2.675	0.2197	55	0.0221	843.1	0.0179
MafA(bZIP)/Islet-MafA-ChIP-Seq(GSE30298)/Homer	TGCTGACTCA	0.1	-2.664	0.2214	233	0.0938	4011.5	0.0853
BIM1(bHLH)/colamp-BIM1-DAP-Seq(GSE60143)/Homer	NNNNNNVTCACGTGM	0.1	-2.639	0.2264	36	0.0145	524.5	0.0111
Replumless(BLH)/Arabidopsis-RPL.GFP-ChIP-Seq(GSE78727)/Homer	HGTCWHATCA	0.1	-2.619	0.2301	218	0.0878	3745.9	0.0796
SND2(NAC)/colamp-SND2-DAP-Seq(GSE60143)/Homer	CTTVWNNNWBAAGNW	0.1	-2.601	0.2336	109	0.0439	1791.2	0.0381
GBF6(bZIP)/colamp-GBF6-DAP-Seq(GSE60143)/Homer	WWTGMCACGTCABCW	0.1	-2.586	0.2363	57	0.0229	883.9	0.0188
TGA3(bZIP)/colamp-TGA3-DAP-Seq(GSE60143)/Homer	WTGATGACGTCATCW	0.1	-2.581	0.2367	21	0.0085	281.3	0.006
c-Myc(bHLH)/mES-cMyc-ChIP-Seq(GSE11431)/Homer	VVCCACGTGG	0.1	-2.568	0.2391	151	0.0608	2543.1	0.0541
PBX1(Homeobox)/MCF7-PBX1-ChIP-Seq(GSE28007)/Homer	GSCTGTCACTCA	0.1	-2.568	0.2391	28	0.0113	395.1	0.0084
AT3G10030(Trihelix)/colamp-AT3G10030-DAP-Seq(GSE60143)/Homer	GCCGTTAA	0.1	-2.558	0.2401	113	0.0455	1866.9	0.0397
ANL2(HB)/col-ANL2-DAP-Seq(GSE60143)/Homer	CATTAATTGC	0.1	-2.544	0.2426	58	0.0233	903.3	0.0192
DUX4(Homeobox)/Myoblasts-DUX4.V5-ChIP-Seq(GSE75791)/Homer	NWTAAYCYAATCAWN	0.1	-2.51	0.2503	7	0.0028	70.2	0.0015
TBP3(MYBrelated)/col-TBP3-DAP-Seq(GSE60143)/Homer	VYTAGGGCAN	0.1	-2.496	0.253	188	0.0757	3218.7	0.0684
AT3G42860(zfGRF)/col-AT3G42860-DAP-Seq(GSE60143)/Homer	CGTTGACTTN	0.1	-2.478	0.2568	51	0.0205	787.6	0.0167
SUT1?/SacCer-Promoters/Homer	CCCCGCGC	0.1	-2.473	0.2572	1896	0.7633	35342.9	0.7512
ANAC011(NAC)/col-ANAC011-DAP-Seq(GSE60143)/Homer	TDCTTGYRNNDCAAG	0.1	-2.447	0.2631	72	0.029	1153.3	0.0245
Phox2a(Homeobox)/Neuron-Phox2a-ChIP-Seq(GSE31456)/Homer	YTAATYNRATTA	0.1	-2.447	0.2631	35	0.0141	518	0.011
SeqBias: C/A-bias	MMMMMMMMMM	0.1	-2.445	0.2631	2483	0.9996	46972.4	0.9984
SeqBias: GCW-triplet	GCWGCWGCWGCW	0.1	-2.43	0.2652	2484	1	47003.2	0.999
Eomes(T-box)/H9-Eomes-ChIP-Seq(GSE26097)/Homer	ATTAACACCT	0.1	-2.427	0.2652	423	0.1703	7533.1	0.1601
bHLH157(bHLH)/col-bHLH157-DAP-Seq(GSE60143)/Homer	KACACGTCTCTY	0.1	-2.422	0.2658	47	0.0189	722.6	0.0154
ANAC017(NAC)/colamp-ANAC017-DAP-Seq(GSE60143)/Homer	TMCTTGNNNNNCAAG	0.1	-2.408	0.2685	31	0.0125	452	0.0096
PU.1-IRF(ETS:IRF)/Bcell-PU.1-ChIP-Seq(GSE21512)/Homer	MGGAAGTGAAAC	0.1	-2.394	0.2715	309	0.1244	5439.8	0.1156
ASL18(LOBAS2)/colamp-ASL18-DAP-Seq(GSE60143)/Homer	CCGGAAAWTCMGGAR	0.1	-2.385	0.2731	476	0.1916	8522.4	0.1811
Pbx3(Homeobox)/GM12878-PBX3-ChIP-Seq(GSE32465)/Homer	SCTGTCAMTCAN	0.1	-2.371	0.2762	70	0.0282	1124.8	0.0239
BMAL1(bHLH)/Liver-Bmal1-ChIP-Seq(GSE39860)/Homer	GNCACGTG	0.1	-2.357	0.2793	446	0.1795	7972.8	0.1695
Tgif2(Homeobox)/mES-Tgif2-ChIP-Seq(GSE55404)/Homer	TGTCANYT	0.1	-2.344	0.2822	773	0.3112	14067.8	0.299
ANAC062(NAC)/colamp-ANAC062-DAP-Seq(GSE60143)/Homer	TACTTANTNWNYAAG	0.1	-2.342	0.2822	75	0.0302	1214.2	0.0258
At4g28140(AP2EREBP)/colamp-At4g28140-DAP-Seq(GSE60143)/Homer	DCCACCGACCAW	0.1	-2.341	0.2822	92	0.037	1514.2	0.0322
Sox15(HMG)/CPA-Sox15-ChIP-Seq(GSE62909)/Homer	RAACAATGGN	0.1	-2.331	0.2832	204	0.0821	3530.1	0.075
MYB105(MYB)/colamp-MYB105-DAP-Seq(GSE60143)/Homer	RATWCCGTTA	0.1	-2.319	0.2857	96	0.0386	1587.2	0.0337
DEL2(E2FDP)/col-DEL2-DAP-Seq(GSE60143)/Homer	WTTTCSCGCC	0.1	-2.313	0.2865	103	0.0415	1712.7	0.0364
Mef2c(MADS)/GM12878-Mef2c-ChIP-Seq(GSE32465)/Homer	DCYAAAAATAGM	0.1	-2.307	0.2874	46	0.0185	712.9	0.0152
ANAC016(NAC)/col-ANAC016-DAP-Seq(GSE60143)/Homer	WNCTTGNNNNNCAMG	1	-2.293	0.2908	167	0.0672	2864.4	0.0609
ANAC020(NAC)/col-ANAC020-DAP-Seq(GSE60143)/Homer	DVCKTGHNNNDCAAG	1	-2.283	0.2927	117	0.0471	1965.6	0.0418
SeqBias: G/A bias	RRRRRRRRRR	1	-2.271	0.2953	2484	1	47006.8	0.9991
ZKSCAN1(Zf)/HepG2-ZKSCAN1-ChIP-Seq(Encode)/Homer	GCACAYAGTAGGKCY	1	-2.259	0.2982	10	0.004	119.3	0.0025
Hoxa11(Homeobox)/ChickenMSG-Hoxa11.Flag-ChIP-Seq(GSE86088)/Homer	TTTTATGGCM	1	-2.25	0.2999	369	0.1486	6569.8	0.1396
HSFC1(HSF)/col-HSFC1-DAP-Seq(GSE60143)/Homer	HTTCTAGAADCTTCT	1	-2.249	0.2999	42	0.0169	647.3	0.0138
ANAC058(NAC)/col-ANAC058-DAP-Seq(GSE60143)/Homer	TWCTTGTDNNACAAG	1	-2.223	0.3063	103	0.0415	1721.1	0.0366
ZNF7(Zf)/HepG2-ZNF7.Flag-ChIP-Seq(Encode)/Homer	CTGCCWVCTTTTRTA	1	-2.211	0.3093	105	0.0423	1758.6	0.0374
LIN-39(Homeobox)/cElegans.L3-LIN39-ChIP-Seq(modEncode)/Homer	ATGATTRATG	1	-2.208	0.3093	147	0.0592	2513.3	0.0534
Unknown(Homeobox)/Limb-p300-ChIP-Seq/Homer	SSCMATWAAA	1	-2.205	0.3093	91	0.0366	1509.5	0.0321
SRS7(SRS)/colamp-SRS7-DAP-Seq(GSE60143)/Homer	HATAGGTTTH	1	-2.187	0.3139	834	0.3357	15250.9	0.3241
Max(bHLH)/K562-Max-ChIP-Seq(GSE31477)/Homer	RCCACGTGGYYN	1	-2.169	0.3188	190	0.0765	3298.3	0.0701
Unknown2/Arabidopsis-Promoters/Homer	AAACGACGTCGTTTT	1	-2.158	0.3214	2	0.0008	11.1	0.0002
PGR(NR)/EndoStromal-PGR-ChIP-Seq(GSE69539)/Homer	AAGAACATWHTGTTC	1	-2.156	0.3214	43	0.0173	670.7	0.0143
Bcl6(Zf)/Liver-Bcl6-ChIP-Seq(GSE31578)/Homer	NNNCTTTCCAGGAAA	1	-2.106	0.3364	314	0.1264	5581.8	0.1186
ANAC005(NAC)/col-ANAC005-DAP-Seq(GSE60143)/Homer	WVCTTVTWNHABAAG	1	-2.092	0.3405	91	0.0366	1520.7	0.0323
Rbpj1(?)/Panc1-Rbpj1-ChIP-Seq(GSE47459)/Homer	HTTTCCCASG	1	-2.075	0.3452	345	0.1389	6159	0.1309
RUNX-AML(Runt)/CD4+-PolII-ChIP-Seq(Barski_et_al.)/Homer	GCTGTGGTTW	1	-2.072	0.3452	167	0.0672	2893.5	0.0615
LBD18(LOBAS2)/colamp-LBD18-DAP-Seq(GSE60143)/Homer	CKGAWWTTCHGS	1	-2.07	0.3452	502	0.2021	9072.4	0.1928
DMRT1(DM)/Testis-DMRT1-ChIP-Seq(GSE64892)/Homer	TWGHWACAWTGTWDC	1	-2.069	0.3452	36	0.0145	555.4	0.0118
LEF1(HMG)/H1-LEF1-ChIP-Seq(GSE64758)/Homer	CCTTTGATST	1	-2.058	0.3472	126	0.0507	2152.3	0.0457
AGL25(MADS)/colamp-AGL25-DAP-Seq(GSE60143)/Homer	TTTCCATWTWTGGAA	1	-2.048	0.3499	7	0.0028	79.5	0.0017
PLT3(AP2EREBP)/col-PLT3-DAP-Seq(GSE60143)/Homer	GCACGNWTHYCGAGG	1	-2.042	0.3509	13	0.0052	172.1	0.0037
ABF1/SacCer-Promoters/Homer	CGTRNAAARTGA	1	-2.041	0.3509	62	0.025	1010.2	0.0215
MYB118(MYB)/colamp-MYB118-DAP-Seq(GSE60143)/Homer	TAWCCGTTAC	1	-2.027	0.3542	55	0.0221	888.6	0.0189
TSO1(CPP)/col-TSO1-DAP-Seq(GSE60143)/Homer	RAATTTRAAW	1	-2.013	0.358	14	0.0056	189.9	0.004
TGA5(bZIP)/col-TGA5-DAP-Seq(GSE60143)/Homer	NNGATGACGTCATCN	1	-2.007	0.3594	27	0.0109	405.6	0.0086
REB1/SacCer-Promoters/Homer	KCCGGGTAAYRR	1	-2.005	0.3594	40	0.0161	628.6	0.0134
PABPC1(?)/MEL-PABC1-CLIP-Seq(GSE69755)/Homer	HAATAAAGNN	1	-2.003	0.3594	241	0.097	4256	0.0905
MafF(bZIP)/HepG2-MafF-ChIP-Seq(GSE31477)/Homer	HWWGTCAGCAWWTTT	1	-1.984	0.3645	39	0.0157	612.3	0.013
PRDM1(Zf)/Hela-PRDM1-ChIP-Seq(GSE31477)/Homer	ACTTTCACTTTC	1	-1.976	0.3666	105	0.0423	1783.9	0.0379
Hoxb4(Homeobox)/ES-Hoxb4-ChIP-Seq(GSE34014)/Homer	TGATTRATGGCY	1	-1.975	0.3666	32	0.0129	493	0.0105
AT1G28160(AP2EREBP)/colamp-AT1G28160-DAP-Seq(GSE60143)/Homer	GGCGGCGG	1	-1.95	0.3744	717	0.2886	13119	0.2788
MYB113(MYB)/col-MYB113-DAP-Seq(GSE60143)/Homer	HNDAWTCMGTTAYWN	1	-1.907	0.3897	67	0.027	1110.3	0.0236
Mef2b(MADS)/HEK293-Mef2b.V5-ChIP-Seq(GSE67450)/Homer	GCTATTTTTGGM	1	-1.905	0.3897	103	0.0415	1755.8	0.0373
SeqBias: CG bias	SSSSSSSSSS	1	-1.898	0.3911	2272	0.9147	42742.6	0.9085
TEAD2(TEA)/Py2T-Tead2-ChIP-Seq(GSE55709)/Homer	CCWGGAATGY	1	-1.888	0.3941	105	0.0423	1793.3	0.0381
RFX(HTH)/K562-RFX3-ChIP-Seq(SRA012198)/Homer	CGGTTGCCATGGCAAC	1	-1.887	0.3941	31	0.0125	480.2	0.0102
TGA9(bZIP)/colamp-TGA9-DAP-Seq(GSE60143)/Homer	VTGACGTC	1	-1.879	0.3952	241	0.097	4277.2	0.0909
AT1G20910(ARID)/col-AT1G20910-DAP-Seq(GSE60143)/Homer	THAATTRAWN	1	-1.871	0.3974	187	0.0753	3287.7	0.0699
DDF2(AP2EREBP)/col-DDF2-DAP-Seq(GSE60143)/Homer	GATGTCGRCR	1	-1.868	0.3978	9	0.0036	114.7	0.0024
ZNF165(Zf)/WHIM12-ZNF165-ChIP-Seq(GSE65937)/Homer	AAGGKGRCGCAGGCA	1	-1.864	0.3983	47	0.0189	761	0.0162
BZR1(BZR)/col-BZR1-DAP-Seq(GSE60143)/Homer	NNCRCACGTGCG	1	-1.857	0.3999	32	0.0129	499.7	0.0106
At1g77640(AP2EREBP)/col-At1g77640-DAP-Seq(GSE60143)/Homer	TGTCGGTGGA	1	-1.855	0.3999	54	0.0217	884.7	0.0188
GBF3(bZIP)/Arabidopsis-GBF3-ChIP-Seq(GSE80564)/Homer	TGCCACGTSAYC	1	-1.842	0.4039	100	0.0403	1708.6	0.0363
Foxh1(Forkhead)/hESC-FOXH1-ChIP-Seq(GSE29422)/Homer	NNTGTGGATTSS	1	-1.832	0.4068	97	0.039	1655.9	0.0352
HAP3(CCAATHAP3)/col-HAP3-DAP-Seq(GSE60143)/Homer	TGATGGAW	1	-1.832	0.4068	73	0.0294	1224.2	0.026
HOXA2(Homeobox)/mES-Hoxa2-ChIP-Seq(Donaldson_et_al.)/Homer	GYCATCMATCAT	1	-1.824	0.408	19	0.0076	280	0.006
VIP1(bZIP)/col-VIP1-DAP-Seq(GSE60143)/Homer	NTTGACAGCTGTCAN	1	-1.823	0.408	50	0.0201	816.3	0.0173
At1g22810(AP2EREBP)/colamp-At1g22810-DAP-Seq(GSE60143)/Homer	BCACCGACANNN	1	-1.811	0.4113	106	0.0427	1820.5	0.0387
LBD19(LOBAS2)/colamp-LBD19-DAP-Seq(GSE60143)/Homer	CCKGAAWTTCMGGAW	1	-1.805	0.4125	389	0.1566	7030.9	0.1494
AIL7(AP2EREBP)/colamp-AIL7-DAP-Seq(GSE60143)/Homer	KCACRAWTYYCGAGG	1	-1.797	0.4148	98	0.0395	1677.1	0.0356
PRDM15(Zf)/ESC-Prdm15-ChIP-Seq(GSE73694)/Homer	YCCDNTCCAGGTTTT	1	-1.792	0.4161	260	0.1047	4643.5	0.0987
E2F7(E2F)/Hela-E2F7-ChIP-Seq(GSE32673)/Homer	VDTTTCCCGCCA	1	-1.789	0.4161	49	0.0197	801.5	0.017
Oct4:Sox17(POU,Homeobox,HMG)/F9-Sox17-ChIP-Seq(GSE44553)/Homer	CCATTGTATGCAAAT	1	-1.779	0.4194	20	0.0081	298.9	0.0064
AT1G44830(AP2EREBP)/col-AT1G44830-DAP-Seq(GSE60143)/Homer	NCCACCGACA	1	-1.778	0.4194	95	0.0382	1625.7	0.0346
ZNF467(Zf)/HEK293-ZNF467.GFP-ChIP-Seq(GSE58341)/Homer	TGGGGAAGGGCM	1	-1.778	0.4194	290	0.1167	5200.4	0.1105
Hoxd11(Homeobox)/ChickenMSG-Hoxd11.Flag-ChIP-Seq(GSE86088)/Homer	VGCCATAAAA	1	-1.756	0.4256	389	0.1566	7042	0.1497
Pho2(bHLH)/Yeast-Pho2-ChIP-Seq(GSE29506)/Homer	CCCACGTGCT	1	-1.752	0.4265	160	0.0644	2811.6	0.0598
At4g31060(AP2EREBP)/colamp-At4g31060-DAP-Seq(GSE60143)/Homer	CACCGACAAW	1	-1.748	0.4269	86	0.0346	1466.5	0.0312
TEAD3(TEA)/HepG2-TEAD3-ChIP-Seq(Encode)/Homer	TRCATTCCAG	1	-1.741	0.4287	214	0.0862	3804.3	0.0809
NPAS(bHLH)/Liver-NPAS-ChIP-Seq(GSE39860)/Homer	NVCACGTG	1	-1.733	0.4311	387	0.1558	7009.2	0.149
EBNA1(EBV-virus)/Raji-EBNA1-ChIP-Seq(GSE30709)/Homer	GGYAGCAYDTGCTDCCCNNN	1	-1.729	0.4318	5	0.002	56.5	0.0012
Srebp1a(bHLH)/HepG2-Srebp1a-ChIP-Seq(GSE31477)/Homer	RTCACSCCAY	1	-1.727	0.4318	49	0.0197	806.2	0.0171
E2F6(E2F)/Hela-E2F6-ChIP-Seq(GSE31477)/Homer	GGCGGGAARN	1	-1.709	0.4383	222	0.0894	3957.7	0.0841
GATA6(C2C2gata)/col200-GATA6-DAP-Seq(GSE60143)/Homer	TAGATCTARAHH	1	-1.688	0.4468	24	0.0097	371.3	0.0079
ATHB20(Homeobox)/colamp-ATHB20-DAP-Seq(GSE60143)/Homer	CAATHATT	1	-1.684	0.4473	36	0.0145	580.4	0.0123
MYB41(MYB)/col-MYB41-DAP-Seq(GSE60143)/Homer	BYTYACCTAA	1	-1.681	0.4474	75	0.0302	1275.1	0.0271
TCF4(bHLH)/SHSY5Y-TCF4-ChIP-Seq(GSE96915)/Homer	SMCATCTGKH	1	-1.68	0.4474	401	0.1614	7282.5	0.1548
PAX5(Paired,Homeobox)/GM12878-PAX5-ChIP-Seq(GSE32465)/Homer	GCAGCCAAGCRTGACH	1	-1.679	0.4474	116	0.0467	2018.8	0.0429
Sox17(HMG)/Endoderm-Sox17-ChIP-Seq(GSE61475)/Homer	CCATTGTTYB	1	-1.677	0.4474	132	0.0531	2310.4	0.0491
CHR(?)/Hela-CellCycle-Expression/Homer	SRGTTTCAAA	1	-1.676	0.4474	86	0.0346	1474.5	0.0313
ZNF675(Zf)/HEK293-ZNF675.GFP-ChIP-Seq(GSE58341)/Homer	ARGAGGMCAAAATGW	1	-1.668	0.448	27	0.0109	424.7	0.009
AT1G04880(ARID)/colamp-AT1G04880-DAP-Seq(GSE60143)/Homer	AAACTATATADTATA	1	-1.665	0.4481	8	0.0032	104.1	0.0022
ANAC096(NAC)/colamp-ANAC096-DAP-Seq(GSE60143)/Homer	TACTTGWNNNWCAAG	1	-1.664	0.4481	116	0.0467	2020.1	0.0429
caudal(Homeobox)/Drosophila-Embryos-ChIP-Chip(modEncode)/Homer	GGYCATAAAW	1	-1.657	0.4495	101	0.0407	1748.7	0.0372
IDD5(C2H2)/colamp-IDD5-DAP-Seq(GSE60143)/Homer	TTTTGTCTTTTTBTK	1	-1.641	0.456	120	0.0483	2096.2	0.0446
ZBTB18(Zf)/HEK293-ZBTB18.GFP-ChIP-Seq(GSE58341)/Homer	AACATCTGGA	1	-1.638	0.4562	130	0.0523	2280	0.0485
SeqBias: polyC-repeat	CCCCCCCCCC	1	-1.637	0.4562	2484	1	47018.1	0.9993
Tcf4(HMG)/Hct116-Tcf4-ChIP-Seq(SRA012054)/Homer	ASATCAAAGGVA	1	-1.634	0.4562	88	0.0354	1515.3	0.0322
E2F1(E2F)/Hela-E2F1-ChIP-Seq(GSE22478)/Homer	CWGGCGGGAA	1	-1.632	0.4562	106	0.0427	1842.8	0.0392
AT5G47660(Trihelix)/colamp-AT5G47660-DAP-Seq(GSE60143)/Homer	AWTTTTACCG	1	-1.627	0.4569	183	0.0737	3253.4	0.0691
Pax7(Paired,Homeobox),long/Myoblast-Pax7-ChIP-Seq(GSE25064)/Homer	TAATCHGATTAC	1	-1.615	0.4612	3	0.0012	29.1	0.0006
ANAC050(NAC)/colamp-ANAC050-DAP-Seq(GSE60143)/Homer	WNCTTGNNNNNCAAG	1	-1.612	0.4612	108	0.0435	1881.7	0.04
MyoD(bHLH)/Myotube-MyoD-ChIP-Seq(GSE21614)/Homer	RRCAGCTGYTSY	1	-1.608	0.4622	261	0.1051	4697.5	0.0998
DMRT6(DM)/Testis-DMRT6-ChIP-Seq(GSE60440)/Homer	YDGHTACAWTGTADC	1	-1.601	0.4641	31	0.0125	498.4	0.0106
TGA1(bZIP)/colamp-TGA1-DAP-Seq(GSE60143)/Homer	TGACGTCAKC	1	-1.598	0.4647	93	0.0374	1611	0.0342
IRF2(IRF)/Erythroblas-IRF2-ChIP-Seq(GSE36985)/Homer	GAAASYGAAASY	1	-1.585	0.4695	21	0.0085	325	0.0069
ZNF143|STAF(Zf)/CUTLL-ZNF143-ChIP-Seq(GSE29600)/Homer	ATTTCCCAGVAKSCY	1	-1.563	0.4789	106	0.0427	1851.3	0.0393
EPR1(MYBrelated)/colamp-EPR1-DAP-Seq(GSE60143)/Homer	AAATATCT	1	-1.56	0.4789	36	0.0145	589.2	0.0125
LHY1(MYBrelated)/col-LHY1-DAP-Seq(GSE60143)/Homer	AAATATCT	1	-1.56	0.4789	36	0.0145	589.2	0.0125
TFE3(bHLH)/MEF-TFE3-ChIP-Seq(GSE75757)/Homer	GTCACGTGACYV	1	-1.547	0.483	26	0.0105	414.2	0.0088
M1BP(Zf)/S2R+-M1BP-ChIP-Seq(GSE49842)/Homer	CAGTGTGACCGT	1	-1.535	0.4881	63	0.0254	1074.5	0.0228
ANAC094(NAC)/col-ANAC094-DAP-Seq(GSE60143)/Homer	DVCGTRNNNNNYACG	1	-1.534	0.4881	114	0.0459	2001.5	0.0425
bHLH80(bHLH)/col-bHLH80-DAP-Seq(GSE60143)/Homer	NNNNDCAASTTGHNN	1	-1.523	0.4913	213	0.0857	3825.3	0.0813
ATHB5(HB)/colamp-ATHB5-DAP-Seq(GSE60143)/Homer	AATGATTG	1	-1.501	0.5013	93	0.0374	1622.4	0.0345
AT2G31460(REMB3)/col-AT2G31460-DAP-Seq(GSE60143)/Homer	WNWARWDGAAATGAT	1	-1.498	0.5016	46	0.0185	772.5	0.0164
MYB3R5(MYB)/col-MYB3R5-DAP-Seq(GSE60143)/Homer	THYAACGGTHAWAWT	1	-1.488	0.5057	12	0.0048	176.9	0.0038
AT5G05550(Trihelix)/col-AT5G05550-DAP-Seq(GSE60143)/Homer	HDNHDTCKCCGGMGA	1	-1.484	0.5062	439	0.1767	8040.9	0.1709
DEAR2(AP2EREBP)/colamp-DEAR2-DAP-Seq(GSE60143)/Homer	HCACCGACAWHD	1	-1.479	0.5075	274	0.1103	4965.4	0.1055
MNT(bHLH)/HepG2-MNT-ChIP-Seq(Encode)/Homer	DGCACACGTG	1	-1.464	0.514	251	0.101	4541.9	0.0965
X-box(HTH)/NPC-H3K4me1-ChIP-Seq(GSE16256)/Homer	GGTTGCCATGGCAA	1	-1.458	0.5163	28	0.0113	455.4	0.0097
Tbx6(T-box)/ESC-Tbx6-ChIP-Seq(GSE93524)/Homer	DAGGTGTBAA	1	-1.456	0.5163	239	0.0962	4320.9	0.0918
ARE(NR)/LNCAP-AR-ChIP-Seq(GSE27824)/Homer	RGRACASNSTGTYCYB	1	-1.455	0.5163	69	0.0278	1191.2	0.0253
Tbet(T-box)/CD8-Tbet-ChIP-Seq(GSE33802)/Homer	AGGTGTGAAM	1	-1.452	0.5163	200	0.0805	3599	0.0765
Sox2(HMG)/mES-Sox2-ChIP-Seq(GSE11431)/Homer	BCCATTGTTC	1	-1.451	0.5163	171	0.0688	3062.7	0.0651
MYB56(MYB)/colamp-MYB56-DAP-Seq(GSE60143)/Homer	HTAACGRMHY	1	-1.432	0.5237	146	0.0588	2604.2	0.0553
RAP211(AP2EREBP)/colamp-RAP211-DAP-Seq(GSE60143)/Homer	RGCCGGCYWW	1	-1.429	0.5241	761	0.3064	14099.9	0.2997
Lhx3(Homeobox)/Neuron-Lhx3-ChIP-Seq(GSE31456)/Homer	ADBTAATTAR	1	-1.425	0.5254	238	0.0958	4308.6	0.0916
Pit1+1bp(Homeobox)/GCrat-Pit1-ChIP-Seq(GSE58009)/Homer	ATGCATAATTCA	1	-1.417	0.528	31	0.0125	511.9	0.0109
STZ(C2H2)/colamp-STZ-DAP-Seq(GSE60143)/Homer	HNBTCACT	1	-1.413	0.529	1378	0.5548	25764.1	0.5476
AT2G15740(C2H2)/col-AT2G15740-DAP-Seq(GSE60143)/Homer	DHNDWATCGATD	1	-1.412	0.529	107	0.0431	1890.5	0.0402
GFY(?)/Promoter/Homer	ACTACAATTCCC	1	-1.411	0.529	19	0.0076	300.1	0.0064
EBF2(EBF)/BrownAdipose-EBF2-ChIP-Seq(GSE97114)/Homer	NABTCCCWDGGGAVH	1	-1.406	0.5292	240	0.0966	4349.7	0.0924
TGA2(bZIP)/colamp-TGA2-DAP-Seq(GSE60143)/Homer	ACGTCAYCHH	1	-1.391	0.536	135	0.0543	2408.1	0.0512
EBF(EBF)/proBcell-EBF-ChIP-Seq(GSE21978)/Homer	DGTCCCYRGGGA	1	-1.386	0.5374	58	0.0233	999.2	0.0212
Barx1(Homeobox)/Stomach-Barx1.3xFlag-ChIP-Seq(GSE69483)/Homer	AAACMATTAN	1	-1.372	0.5441	61	0.0246	1055.4	0.0224
bZIP50(bZIP)/colamp-bZIP50-DAP-Seq(GSE60143)/Homer	GATGACGTCA	1	-1.365	0.5466	211	0.0849	3819	0.0812
AT2G28810(C2C2dof)/colamp-AT2G28810-DAP-Seq(GSE60143)/Homer	VAAAAAGTWA	1	-1.356	0.5502	418	0.1683	7682.5	0.1633
CRE(bZIP)/Promoter/Homer	CSGTGACGTCAC	1	-1.356	0.5502	76	0.0306	1330.4	0.0283
Tbx5(T-box)/HL1-Tbx5.biotin-ChIP-Seq(GSE21529)/Homer	AGGTGTCA	1	-1.356	0.5502	835	0.3362	15518.4	0.3298
AtIDD11(C2H2)/colamp-AtIDD11-DAP-Seq(GSE60143)/Homer	TTTGTCGTTT	1	-1.343	0.554	60	0.0242	1040.5	0.0221
GEI-11(Myb?)/cElegans-L4-GEI11-ChIP-Seq(modEncode)/Homer	CCGACAYYTYACGGG	1	-1.342	0.554	19	0.0076	304.9	0.0065
At5g04390(C2H2)/col200-At5g04390-DAP-Seq(GSE60143)/Homer	AGTGANDN	1	-1.325	0.5615	1328	0.5346	24850	0.5282
AT5G23930(mTERF)/col-AT5G23930-DAP-Seq(GSE60143)/Homer	GGCGGCTG	1	-1.323	0.5615	692	0.2786	12836.5	0.2728
MYB116(MYB)/colamp-MYB116-DAP-Seq(GSE60143)/Homer	AGTTAGGCAN	1	-1.322	0.5615	132	0.0531	2364	0.0502
NAC2(NAC)/colamp-NAC2-DAP-Seq(GSE60143)/Homer	TDCTTGNNNNNCAAG	1	-1.319	0.5615	120	0.0483	2143.6	0.0456
Hoxd13(Homeobox)/ChickenMSG-Hoxd13.Flag-ChIP-Seq(GSE86088)/Homer	NCYAATAAAA	1	-1.311	0.5648	219	0.0882	3979.6	0.0846
Myf5(bHLH)/GM-Myf5-ChIP-Seq(GSE24852)/Homer	BAACAGCTGT	1	-1.299	0.5699	210	0.0845	3814.5	0.0811
AT5G25475(ABI3VP1)/col-AT5G25475-DAP-Seq(GSE60143)/Homer	RNNRNCAAGCADNDB	1	-1.288	0.5755	303	0.122	5550.6	0.118
Mouse_Recombination_Hotspot(Zf)/Testis-DMC1-ChIP-Seq(GSE24438)/Homer	ACTYKNATTCGTGNTACTTC	1	-1.284	0.5761	12	0.0048	185.8	0.0039
BOS1(MYB)/col-BOS1-DAP-Seq(GSE60143)/Homer	NNRCCTAACT	1	-1.269	0.5835	191	0.0769	3468	0.0737
DREF/Drosophila-Promoters/Homer	AVYTATCGATAD	1	-1.256	0.5902	2	0.0008	20.6	0.0004
MYB39(MYB)/col-MYB39-DAP-Seq(GSE60143)/Homer	WWAARKTAGGTGRAA	1	-1.256	0.5902	25	0.0101	416.4	0.0089
AT3G51470(DBP)/col-AT3G51470-DAP-Seq(GSE60143)/Homer	TTWHGGTGCACC	1	-1.255	0.5902	365	0.1469	6718.5	0.1428
DREB26(AP2EREBP)/col-DREB26-DAP-Seq(GSE60143)/Homer	CCACCGACAH	1	-1.243	0.594	72	0.029	1271.9	0.027
NTM2(NAC)/col-NTM2-DAP-Seq(GSE60143)/Homer	CTTRTNNNAYAAGBH	1	-1.243	0.594	102	0.0411	1823.3	0.0388
Smad4(MAD)/ESC-SMAD4-ChIP-Seq(GSE29422)/Homer	VBSYGTCTGG	1	-1.239	0.594	487	0.1961	9010.2	0.1915
Sp2(Zf)/HEK293-Sp2.eGFP-ChIP-Seq(Encode)/Homer	YGGCCCCGCCCC	1	-1.239	0.594	614	0.2472	11397.8	0.2423
OCT:OCT-short(POU,Homeobox)/NPC-OCT6-ChIP-Seq(GSE43916)/Homer	ATGCATWATGCATRW	1	-1.235	0.594	72	0.029	1272.6	0.027
MafK(bZIP)/C2C12-MafK-ChIP-Seq(GSE36030)/Homer	GCTGASTCAGCA	1	-1.231	0.5951	61	0.0246	1071.9	0.0228
ATHB33(ZFHD)/col-ATHB33-DAP-Seq(GSE60143)/Homer	NGTRATTAAK	1	-1.22	0.6001	169	0.068	3068.7	0.0652
DEAR3(AP2EREBP)/colamp-DEAR3-DAP-Seq(GSE60143)/Homer	BCACCGACAWNNNNN	1	-1.219	0.6001	69	0.0278	1219.1	0.0259
HAT2(Homeobox)/colamp-HAT2-DAP-Seq(GSE60143)/Homer	CYAATSATTR	1	-1.213	0.6017	101	0.0407	1809	0.0384
TGA6(bZIP)/colamp-TGA6-DAP-Seq(GSE60143)/Homer	TGACGTCABC	1	-1.213	0.6017	129	0.0519	2328	0.0495
TEAD(TEA)/Fibroblast-PU.1-ChIP-Seq(Unpublished)/Homer	YCWGGAATGY	1	-1.203	0.6056	112	0.0451	2014.5	0.0428
At3g60580(C2H2)/col-At3g60580-DAP-Seq(GSE60143)/Homer	WTTYTACT	1	-1.202	0.6056	1173	0.4722	21962.3	0.4668
TCP20(TCP)/col-TCP20-DAP-Seq(GSE60143)/Homer	GGDCCCAC	1	-1.2	0.6056	111	0.0447	1996.3	0.0424
Sox10(HMG)/SciaticNerve-Sox3-ChIP-Seq(GSE35132)/Homer	CCWTTGTYYB	1	-1.194	0.6072	335	0.1349	6173.6	0.1312
At5g08330(TCP)/col-At5g08330-DAP-Seq(GSE60143)/Homer	GGRCCCAC	1	-1.194	0.6072	180	0.0725	3278.7	0.0697
Nanog(Homeobox)/mES-Nanog-ChIP-Seq(GSE11724)/Homer	RGCCATTAAC	1	-1.193	0.6072	875	0.3523	16333.7	0.3472
bZIP44(bZIP)/colamp-bZIP44-DAP-Seq(GSE60143)/Homer	NDTGCCACGTCAGCH	1	-1.19	0.6072	7	0.0028	103.3	0.0022
Ap4(bHLH)/AML-Tfap4-ChIP-Seq(GSE45738)/Homer	NAHCAGCTGD	1	-1.186	0.6073	355	0.1429	6551	0.1392
HuR(?)/HEK293-HuR-CLIP-Seq(GSE87887)/Homer	BTTTGGTTTG	1	-1.182	0.6083	619	0.2492	11511	0.2447
Tbx20(T-box)/Heart-Tbx20-ChIP-Seq(GSE29636)/Homer	GGTGYTGACAGS	1	-1.178	0.6095	57	0.0229	1004.4	0.0213
AGL16(MADS)/col-AGL16-DAP-Seq(GSE60143)/Homer	TWCCHWATWDGGAAA	1	-1.172	0.6121	11	0.0044	173.2	0.0037
LBD23(LOBAS2)/colamp-LBD23-DAP-Seq(GSE60143)/Homer	GCGNAWWWTNCGCYW	1	-1.169	0.6127	281	0.1131	5169.4	0.1099
Unknown1/Arabidopsis-Promoters/Homer	RGGGTAWWWTHGTAA	1	-1.163	0.6151	12	0.0048	191.1	0.0041
TGA4(bZIP)/colamp-TGA4-DAP-Seq(GSE60143)/Homer	RTGACGTCAKCW	1	-1.162	0.6151	63	0.0254	1116.5	0.0237
Hoxa10(Homeobox)/ChickenMSG-Hoxa10.Flag-ChIP-Seq(GSE86088)/Homer	GGYAATGAAA	1	-1.159	0.6151	79	0.0318	1411.2	0.03
GRE(NR),IR3/A549-GR-ChIP-Seq(GSE32465)/Homer	NRGVACABNVTGTYCY	1	-1.154	0.6167	30	0.0121	514.9	0.0109
GFY-Staf(?,Zf)/Promoter/Homer	RACTACAATTCCCAGAAKGC	1	-1.15	0.6179	20	0.0081	334.3	0.0071
Pknox1(Homeobox)/ES-Prep1-ChIP-Seq(GSE63282)/Homer	SCTGTCAVTCAV	1	-1.145	0.6197	60	0.0242	1063.7	0.0226
MYB4(MYB)/col200-MYB4-DAP-Seq(GSE60143)/Homer	WAGKTAGGTARR	1	-1.138	0.6233	114	0.0459	2062.3	0.0438
TEAD1(TEAD)/HepG2-TEAD1-ChIP-Seq(Encode)/Homer	CYRCATTCCA	1	-1.129	0.6275	182	0.0733	3329.5	0.0708
TF3A(C2H2)/col-TF3A-DAP-Seq(GSE60143)/Homer	NNDDGAGGAGGWNNN	1	-1.126	0.6282	382	0.1538	7075	0.1504
Dorsal(RHD)/Embryo-dl-ChIP-Seq(GSE65441)/Homer	GGGAAAAMCCCG	1	-1.12	0.6309	39	0.0157	681.5	0.0145
AGL15(MADS)/col-AGL15-DAP-Seq(GSE60143)/Homer	TTTCCHWATWDGGAA	1	-1.11	0.6355	16	0.0064	265.7	0.0056
ZNF264(Zf)/HEK293-ZNF264.GFP-ChIP-Seq(GSE58341)/Homer	RGGGCACTAACY	1	-1.109	0.6355	180	0.0725	3296.3	0.0701
SeqBias: GA-repeat	GAGAGAGAGA	1	-1.108	0.6355	1611	0.6486	30305.3	0.6441
ANAC083(NAC)/col-ANAC083-DAP-Seq(GSE60143)/Homer	CKTRWNNNWYAMGTA	1	-1.094	0.6421	113	0.0455	2051.9	0.0436
Hoxa9(Homeobox)/ChickenMSG-Hoxa9.Flag-ChIP-Seq(GSE86088)/Homer	RGCAATNAAA	1	-1.089	0.6439	472	0.19	8777.6	0.1866
CUC1(NAC)/col-CUC1-DAP-Seq(GSE60143)/Homer	TACTTGTNNNACAAG	1	-1.087	0.6444	76	0.0306	1366.6	0.029
ZNF669(Zf)/HEK293-ZNF669.GFP-ChIP-Seq(GSE58341)/Homer	GARTGGTCATCGCCC	1	-1.083	0.6444	23	0.0093	393.9	0.0084
AT5G22990(C2H2)/col-AT5G22990-DAP-Seq(GSE60143)/Homer	WCGAHDTCGWHN	1	-1.083	0.6444	23	0.0093	393.1	0.0084
E-box(bHLH)/Promoter/Homer	SSGGTCACGTGA	1	-1.077	0.647	26	0.0105	448.8	0.0095
ZNF528(Zf)/HEK293-ZNF528.GFP-ChIP-Seq(GSE58341)/Homer	AGAAATGACTTCCCT	1	-1.071	0.6492	2	0.0008	23.1	0.0005
DUX(Homeobox)/C2C12-Dux-ChIP-Seq(GSE87279)/Homer	BCWGATTCAATCAAN	1	-1.066	0.6517	1	0.0004	8.4	0.0002
HAT1(Homeobox)/col-HAT1-DAP-Seq(GSE60143)/Homer	SCAATCATTGNN	1	-1.064	0.6517	15	0.006	250.2	0.0053
HOXA9(Homeobox)/HSC-Hoxa9-ChIP-Seq(GSE33509)/Homer	GGCCATAAATCA	1	-1.061	0.6524	91	0.0366	1648.3	0.035
E2F4(E2F)/K562-E2F4-ChIP-Seq(GSE31477)/Homer	GGCGGGAAAH	1	-1.056	0.6543	186	0.0749	3420.2	0.0727
AT3G25990(Trihelix)/colamp-AT3G25990-DAP-Seq(GSE60143)/Homer	TTAACCATAG	1	-1.056	0.6543	110	0.0443	2002.7	0.0426
GAGA-repeat/SacCer-Promoters/Homer	CTYTCTYTCTCTCTC	1	-1.054	0.6543	900	0.3623	16862.6	0.3584
TGA10(bZIP)/colamp-TGA10-DAP-Seq(GSE60143)/Homer	ATGACGTC	1	-1.052	0.6543	117	0.0471	2133.5	0.0453
ELT-3(Gata)/cElegans-L1-ELT3-ChIP-Seq(modEncode)/Homer	AWTGATAAGA	1	-1.05	0.6543	51	0.0205	909.8	0.0193
ERF15(AP2EREBP)/colamp-ERF15-DAP-Seq(GSE60143)/Homer	WDHAGCMGCCAT	1	-1.049	0.6543	767	0.3088	14352.6	0.3051
HDG1(Homeobox)/col100-HDG1-DAP-Seq(GSE60143)/Homer	DDYAATTAATGH	1	-1.044	0.6543	47	0.0189	836.8	0.0178
At1g72010(TCP)/colamp-At1g72010-DAP-Seq(GSE60143)/Homer	GGDCCCAC	1	-1.044	0.6543	150	0.0604	2750.4	0.0585
ZBTB33(Zf)/GM12878-ZBTB33-ChIP-Seq(GSE32465)/Homer	GGVTCTCGCGAGAAC	1	-1.041	0.6543	21	0.0085	360.6	0.0077
AT1G49560(G2like)/colamp-AT1G49560-DAP-Seq(GSE60143)/Homer	GAWTCTNWDA	1	-1.04	0.6543	239	0.0962	4416.6	0.0939
GATA11(C2C2gata)/col-GATA11-DAP-Seq(GSE60143)/Homer	DDHYYAGATCTR	1	-1.038	0.6543	83	0.0334	1503.2	0.032
Pax8(Paired,Homeobox)/Thyroid-Pax8-ChIP-Seq(GSE26938)/Homer	GTCATGCHTGRCTGS	1	-1.018	0.6652	96	0.0386	1748.5	0.0372
bZIP42(bZIP)/colamp-bZIP42-DAP-Seq(GSE60143)/Homer	GCCACGTCAGCA	1	-1.017	0.6652	2	0.0008	24.3	0.0005
Tcf12(bHLH)/GM12878-Tcf12-ChIP-Seq(GSE32465)/Homer	VCAGCTGYTG	1	-1.004	0.6725	295	0.1188	5477.1	0.1164
Unknown3/Arabidopsis-Promoters/Homer	AYTAAACCGG	1	-0.9716	0.6931	33	0.0133	586.1	0.0125
ZNF189(Zf)/HEK293-ZNF189.GFP-ChIP-Seq(GSE58341)/Homer	TGGAACAGMA	1	-0.966	0.6956	212	0.0853	3929.9	0.0835
ANAC053(NAC)/colamp-ANAC053-DAP-Seq(GSE60143)/Homer	TDCTTGNNNNNCAAG	1	-0.9406	0.7122	95	0.0382	1743.3	0.0371
NRF(NRF)/Promoter/Homer	STGCGCATGCGC	1	-0.9382	0.7126	87	0.035	1594.1	0.0339
At2g41835(C2H2)/col-At2g41835-DAP-Seq(GSE60143)/Homer	TTTGAAAA	1	-0.937	0.7126	62	0.025	1128.1	0.024
WRKY21(WRKY)/colamp-WRKY21-DAP-Seq(GSE60143)/Homer	DCGTTGACTTTT	1	-0.925	0.7194	14	0.0056	241.9	0.0051
MS188(MYB)/colamp-MS188-DAP-Seq(GSE60143)/Homer	WARKTAGGTRRA	1	-0.9222	0.7201	110	0.0443	2027.9	0.0431
At1g76110(ARID)/colamp-At1g76110-DAP-Seq(GSE60143)/Homer	ATTTAATG	1	-0.9173	0.7223	59	0.0238	1075.9	0.0229
ANAC057(NAC)/colamp-ANAC057-DAP-Seq(GSE60143)/Homer	DVCKTGNNNNNCAMG	1	-0.9155	0.7223	134	0.0539	2478.7	0.0527
Dlx3(Homeobox)/Kerainocytes-Dlx3-ChIP-Seq(GSE89884)/Homer	NDGTAATTAC	1	-0.9077	0.7265	72	0.029	1319.2	0.028
Hoxd10(Homeobox)/ChickenMSG-Hoxd10.Flag-ChIP-Seq(GSE86088)/Homer	GGCMATGAAA	1	-0.9036	0.7282	167	0.0672	3100.5	0.0659
ANAC087(NAC)/col-ANAC087-DAP-Seq(GSE60143)/Homer	WVCKTGHNNNWCAMG	1	-0.9	0.7294	52	0.0209	947.4	0.0201
GATA19(C2C2gata)/colamp-GATA19-DAP-Seq(GSE60143)/Homer	ATCSGATCVG	1	-0.8974	0.73	11	0.0044	188	0.004
ANAC103(NAC)/col-ANAC103-DAP-Seq(GSE60143)/Homer	AACTTGNWNWNCAAG	1	-0.8883	0.7353	66	0.0266	1210.8	0.0257
E2F3(E2F)/MEF-E2F3-ChIP-Seq(GSE71376)/Homer	BTKGGCGGGAAA	1	-0.8865	0.7353	247	0.0994	4609.3	0.098
SPL1(SBP)/colamp-SPL1-DAP-Seq(GSE60143)/Homer	HYGTACDTWH	1	-0.8838	0.7359	319	0.1284	5966.9	0.1268
HIF2a(bHLH)/785_O-HIF2a-ChIP-Seq(GSE34871)/Homer	GCACGTACCC	1	-0.8823	0.7359	98	0.0395	1810.2	0.0385
MYB3R4(MYB)/col-MYB3R4-DAP-Seq(GSE60143)/Homer	AWWTAACCGTTR	1	-0.8778	0.7377	24	0.0097	429.5	0.0091
ZIM(C2C2gata)/col-ZIM-DAP-Seq(GSE60143)/Homer	ATCSRACGGTYRAGA	1	-0.8747	0.7386	2	0.0008	27.7	0.0006
Rfx6(HTH)/Min6b1-Rfx6.HA-ChIP-Seq(GSE62844)/Homer	TGTTKCCTAGCAACM	1	-0.8717	0.7395	306	0.1232	5725.3	0.1217
AT5G63260(C3H)/col-AT5G63260-DAP-Seq(GSE60143)/Homer	RAAAAAGTRA	1	-0.8642	0.7437	403	0.1622	7557.8	0.1606
GATA20(C2C2gata)/colamp-GATA20-DAP-Seq(GSE60143)/Homer	TNGATCNDNM	1	-0.864	0.7437	419	0.1687	7859.5	0.167
ETS:RUNX(ETS,Runt)/Jurkat-RUNX1-ChIP-Seq(GSE17954)/Homer	RCAGGATGTGGT	1	-0.8628	0.7437	25	0.0101	449.8	0.0096
DDF1(AP2EREBP)/col-DDF1-DAP-Seq(GSE60143)/Homer	GCCGACAT	1	-0.8488	0.7512	79	0.0318	1460.7	0.031
Brachyury(T-box)/Mesoendoderm-Brachyury-ChIP-exo(GSE54963)/Homer	ANTTMRCASBNNNGTGYKAAN	1	-0.8475	0.7512	50	0.0201	917.2	0.0195
Sox6(HMG)/Myotubes-Sox6-ChIP-Seq(GSE32627)/Homer	CCATTGTTNY	1	-0.8473	0.7512	286	0.1151	5356.6	0.1139
HSFA6B(HSF)/colamp-HSFA6B-DAP-Seq(GSE60143)/Homer	NTTCTAGAANHTTCT	1	-0.8338	0.7585	82	0.033	1519.5	0.0323
Pitx1:Ebox(Homeobox,bHLH)/Hindlimb-Pitx1-ChIP-Seq(GSE41591)/Homer	YTAATTRAWWCCAGATGT	1	-0.8254	0.7635	19	0.0076	341.6	0.0073
CArG(MADS)/PUER-Srf-ChIP-Seq(Sullivan_et_al.)/Homer	CCATATATGGNM	1	-0.8145	0.7704	49	0.0197	903.8	0.0192
SPL15(SBP)/colamp-SPL15-DAP-Seq(GSE60143)/Homer	WDWMMGTACADW	1	-0.8083	0.7739	262	0.1055	4916.1	0.1045
EKLF(Zf)/Erythrocyte-Klf1-ChIP-Seq(GSE20478)/Homer	NWGGGTGTGGCY	1	-0.8029	0.7767	61	0.0246	1130.5	0.024
CTCF-SatelliteElement(Zf?)/CD4+-CTCF-ChIP-Seq(Barski_et_al.)/Homer	TGCAGTTCCMVNWRTGGCCA	1	-0.8015	0.7767	4	0.0016	66	0.0014
ATHB18(Homeobox)/colamp-ATHB18-DAP-Seq(GSE60143)/Homer	YCAATSATTG	1	-0.801	0.7767	14	0.0056	250.7	0.0053
ZNF322(Zf)/HEK293-ZNF322.GFP-ChIP-Seq(GSE58341)/Homer	GAGCCTGGTACTGWGCCTGR	1	-0.7991	0.7767	90	0.0362	1676.9	0.0356
MYB62(MYB)/colamp-MYB62-DAP-Seq(GSE60143)/Homer	NTACCTAACT	1	-0.7984	0.7767	272	0.1095	5108.7	0.1086
NUC(C2H2)/col-NUC-DAP-Seq(GSE60143)/Homer	HAVAAAACGACAAAA	1	-0.7983	0.7767	12	0.0048	213.4	0.0045
FHY3(FAR1)/Arabidopsis-FHY3-ChIP-Seq(GSE30711)/Homer	HHCACGCGCBTN	1	-0.7956	0.7767	124	0.0499	2317.9	0.0493
HSFB4(HSF)/col-HSFB4-DAP-Seq(GSE60143)/Homer	TTCTAGAAGCTTCTA	1	-0.7954	0.7767	6	0.0024	102.4	0.0022
MYB119(MYB)/colamp-MYB119-DAP-Seq(GSE60143)/Homer	YRACCGTTACDD	1	-0.7949	0.7767	44	0.0177	812.6	0.0173
At1g69690(TCP)/colamp-At1g69690-DAP-Seq(GSE60143)/Homer	NHGTGGGGCCCACHW	1	-0.7932	0.7767	59	0.0238	1094.8	0.0233
ESE3(AP2EREBP)/col-ESE3-DAP-Seq(GSE60143)/Homer	GACGGTGG	1	-0.7872	0.7767	513	0.2065	9666.2	0.2054
HOXA1(Homeobox)/mES-Hoxa1-ChIP-Seq(SRP084292)/Homer	TGATKGATGR	1	-0.7829	0.7772	38	0.0153	701.5	0.0149
p53(p53)/Saos-p53-ChIP-Seq(GSE15780)/Homer	RRCATGYCYRGRCATGYYYN	1	-0.7752	0.7805	21	0.0085	383.8	0.0082
p53(p53)/Saos-p53-ChIP-Seq/Homer	RRCATGYCYRGRCATGYYYN	1	-0.7752	0.7805	21	0.0085	383.8	0.0082
MyoG(bHLH)/C2C12-MyoG-ChIP-Seq(GSE36024)/Homer	AACAGCTG	1	-0.7723	0.7814	318	0.128	5986.3	0.1272
LMI1(HB)/colamp-LMI1-DAP-Seq(GSE60143)/Homer	AATTATTG	1	-0.772	0.7814	56	0.0225	1041.5	0.0221
AtGRF6(GRF)/col-AtGRF6-DAP-Seq(GSE60143)/Homer	NTGTCAGADNNNNNN	1	-0.7658	0.7838	292	0.1176	5497.7	0.1168
HRE(HSF)/Striatum-HSF1-ChIP-Seq(GSE38000)/Homer	TTCTAGAABNTTCTA	1	-0.7632	0.7845	36	0.0145	666.8	0.0142
HSF7(HSF)/colamp-HSF7-DAP-Seq(GSE60143)/Homer	TTCTAGAAGCTTCTA	1	-0.7631	0.7845	31	0.0125	572.3	0.0122
SPL9(SBP)/colamp-SPL9-DAP-Seq(GSE60143)/Homer	BTGTACTT	1	-0.7628	0.7845	453	0.1824	8543	0.1816
bHLH122(bHLH)/col100-bHLH122-DAP-Seq(GSE60143)/Homer	NDDCAASTTGHHNWW	1	-0.7612	0.7845	175	0.0705	3288	0.0699
ATHB7(Homeobox)/col-ATHB7-DAP-Seq(GSE60143)/Homer	AATGATTG	1	-0.7601	0.7845	82	0.033	1533.2	0.0326
Ronin(THAP)/ES-Thap11-ChIP-Seq(GSE51522)/Homer	RACTACAACTCCCAGVAKGC	1	-0.7573	0.7845	12	0.0048	216.1	0.0046
Stat3+il21(Stat)/CD4-Stat3-ChIP-Seq(GSE19198)/Homer	SVYTTCCNGGAARB	1	-0.7566	0.7845	160	0.0644	3006.7	0.0639
PRDM9(Zf)/Testis-DMC1-ChIP-Seq(GSE35498)/Homer	ADGGYAGYAGCATCT	1	-0.7485	0.7865	117	0.0471	2196.4	0.0467
PBX2(Homeobox)/K562-PBX2-ChIP-Seq(Encode)/Homer	RTGATTKATRGN	1	-0.7377	0.7938	113	0.0455	2123.5	0.0451
SOL1(CPP)/colamp-SOL1-DAP-Seq(GSE60143)/Homer	ATTTAAATHN	1	-0.7357	0.794	178	0.0717	3352.6	0.0713
AT2G20110(CPP)/colamp-AT2G20110-DAP-Seq(GSE60143)/Homer	ATTYAAATHY	1	-0.732	0.7956	179	0.0721	3372.5	0.0717
Cdx2(Homeobox)/mES-Cdx2-ChIP-Seq(GSE14586)/Homer	GYMATAAAAH	1	-0.7253	0.7996	72	0.029	1352	0.0287
SOC1(MADS)/Seedling-SOC1-ChIP-Seq(GSE45846)/Homer	TWCCAWWTWTGG	1	-0.725	0.7996	45	0.0181	841.3	0.0179
MYB57(MYB)/col-MYB57-DAP-Seq(GSE60143)/Homer	TTACCTAACT	1	-0.7247	0.7996	73	0.0294	1370.8	0.0291
PAX3:FKHR-fusion(Paired,Homeobox)/Rh4-PAX3:FKHR-ChIP-Seq(GSE19063)/Homer	ACCRTGACTAATTNN	1	-0.7247	0.7996	29	0.0117	539.9	0.0115
At4g01280(MYBrelated)/colamp-At4g01280-DAP-Seq(GSE60143)/Homer	AAATATCT	1	-0.7165	0.8013	48	0.0193	899.4	0.0191
Rfx1(HTH)/NPC-H3K4me1-ChIP-Seq(GSE16256)/Homer	KGTTGCCATGGCAA	1	-0.7158	0.8013	49	0.0197	918.3	0.0195
HSF3(HSF)/colamp-HSF3-DAP-Seq(GSE60143)/Homer	NTTCTAGAAKCTTCT	1	-0.7112	0.8028	155	0.0624	2924.1	0.0621
n-Myc(bHLH)/mES-nMyc-ChIP-Seq(GSE11431)/Homer	VRCCACGTGG	1	-0.7109	0.8028	196	0.0789	3700.3	0.0786
MYB49(MYB)/col-MYB49-DAP-Seq(GSE60143)/Homer	ARKTAGGTRR	1	-0.7105	0.8028	184	0.0741	3473.6	0.0738
GATA3(Zf),DR8/iTreg-Gata3-ChIP-Seq(GSE20898)/Homer	AGATSTNDNNDSAGATAASN	1	-0.7068	0.8028	11	0.0044	201.3	0.0043
Hoxd12(Homeobox)/ChickenMSG-Hoxd12.Flag-ChIP-Seq(GSE86088)/Homer	HDGYAATGAAAN	1	-0.6937	0.8115	251	0.101	4747.7	0.1009
bZIP:IRF(bZIP,IRF)/Th17-BatF-ChIP-Seq(GSE39756)/Homer	NAGTTTCABTHTGACTNW	1	-0.6824	0.8194	59	0.0238	1113.7	0.0237
Unknown4/Drosophila-Promoters/Homer	AAAAATACCRMA	1	-0.6814	0.8194	9	0.0036	165.7	0.0035
TCP17(TCP)/col-TCP17-DAP-Seq(GSE60143)/Homer	GTGGTCCCCA	1	-0.6801	0.8194	14	0.0056	261	0.0055
CUC3(NAC)/col-CUC3-DAP-Seq(GSE60143)/Homer	TRCKTGWNNNACAMG	1	-0.6788	0.8194	50	0.0201	943.7	0.0201
GRF9(GRF)/colamp-GRF9-DAP-Seq(GSE60143)/Homer	NWCTGACANNNNNNN	1	-0.6782	0.8194	223	0.0898	4222.2	0.0897
EFL-1(E2F)/cElegans-L1-EFL1-ChIP-Seq(modEncode)/Homer	TGCAARYGCGCTCYA	1	-0.6635	0.8281	5	0.002	90.9	0.0019
Sox4(HMG)/proB-Sox4-ChIP-Seq(GSE50066)/Homer	YCTTTGTTCC	1	-0.6582	0.8312	165	0.0664	3129.9	0.0665
CCA(Myb)/Arabidopsis-CCA.GFP-ChIP-Seq(GSE70533)/Homer	AGATATYTTT	1	-0.658	0.8312	92	0.037	1744.6	0.0371
At5g08750(C3H)/col-At5g08750-DAP-Seq(GSE60143)/Homer	NWDTTGCGGCTR	1	-0.6571	0.8312	103	0.0415	1953.9	0.0415
At1g74840(MYBrelated)/col100-At1g74840-DAP-Seq(GSE60143)/Homer	YHTTATCCAWWT	1	-0.6498	0.8341	82	0.033	1556.2	0.0331
HSFA1E(HSF)/col-HSFA1E-DAP-Seq(GSE60143)/Homer	TTCTAGAAGCTTCTA	1	-0.647	0.8351	14	0.0056	263.7	0.0056
ZNF136(Zf)/HEK293-ZNF136.GFP-ChIP-Seq(GSE58341)/Homer	YTKGATAHAGTATTCTWGGTNGGCA	1	-0.6435	0.8366	11	0.0044	206.7	0.0044
PUCHI(AP2EREBP)/colamp-PUCHI-DAP-Seq(GSE60143)/Homer	GCGCCGTY	1	-0.642	0.8366	369	0.1486	7004.2	0.1489
IDD4(C2H2)/col-IDD4-DAP-Seq(GSE60143)/Homer	TTTGTCTTTWTB	1	-0.6399	0.8369	138	0.0556	2622.9	0.0557
LBD13(LOBAS2)/colamp-LBD13-DAP-Seq(GSE60143)/Homer	KCCGTNWTTTBCGGC	1	-0.6384	0.8369	297	0.1196	5640.8	0.1199
bHLH28(bHLH)/col-bHLH28-DAP-Seq(GSE60143)/Homer	NHHTGTACGGAH	1	-0.6374	0.8369	46	0.0185	874.1	0.0186
At5g18450(AP2EREBP)/col-At5g18450-DAP-Seq(GSE60143)/Homer	CACCGCTT	1	-0.6303	0.8409	566	0.2279	10745.6	0.2284
LOB(LOBAS2)/col-LOB-DAP-Seq(GSE60143)/Homer	CGCCGKAWWTTHCGS	1	-0.6244	0.8445	94	0.0378	1790.8	0.0381
MYB121(MYB)/col-MYB121-DAP-Seq(GSE60143)/Homer	YNTACCTAACWW	1	-0.6162	0.8501	51	0.0205	973.6	0.0207
ABR1(AP2EREBP)/colamp-ABR1-DAP-Seq(GSE60143)/Homer	AAATGGCGGCGG	1	-0.6138	0.8507	358	0.1441	6808.6	0.1447
ATHB53(HB)/col-ATHB53-DAP-Seq(GSE60143)/Homer	CAATAATT	1	-0.6111	0.8517	40	0.0161	764.5	0.0162
ANAC092(NAC)/colamp-ANAC092-DAP-Seq(GSE60143)/Homer	WRCKTGWNNNWCAMG	1	-0.6105	0.8517	65	0.0262	1241.2	0.0264
ERF115(AP2EREBP)/colamp-ERF115-DAP-Seq(GSE60143)/Homer	WTKRCGGCGB	1	-0.6103	0.8517	558	0.2246	10604.4	0.2254
At4g32800(AP2EREBP)/colamp-At4g32800-DAP-Seq(GSE60143)/Homer	DYCACCGACAHWWWH	1	-0.6036	0.8539	18	0.0072	344.4	0.0073
Hoxc9(Homeobox)/Ainv15-Hoxc9-ChIP-Seq(GSE21812)/Homer	GGCCATAAATCA	1	-0.6028	0.8539	57	0.0229	1090.1	0.0232
GRHL2(CP2)/HBE-GRHL2-ChIP-Seq(GSE46194)/Homer	AAACYKGTTWDACMRGTTTB	1	-0.602	0.8539	68	0.0274	1300	0.0276
AT1G47655(C2C2dof)/colamp-AT1G47655-DAP-Seq(GSE60143)/Homer	YHACTTTTTS	1	-0.6014	0.8539	641	0.2581	12183.1	0.2589
CDX4(Homeobox)/ZebrafishEmbryos-Cdx4.Myc-ChIP-Seq(GSE48254)/Homer	NGYCATAAAWCH	1	-0.5986	0.8539	107	0.0431	2044.4	0.0435
CAMTA5(CAMTA)/col-CAMTA5-DAP-Seq(GSE60143)/Homer	ACGCGTTTTANACRC	1	-0.5957	0.8539	53	0.0213	1015.9	0.0216
TCP1(TCP)/col-TCP1-DAP-Seq(GSE60143)/Homer	GGGGGCCCMMCN	1	-0.5915	0.8561	77	0.031	1474.4	0.0313
AT3G10113(MYBrelated)/col-AT3G10113-DAP-Seq(GSE60143)/Homer	WNAAATATCWWN	1	-0.5913	0.8561	38	0.0153	729.9	0.0155
At1g68670(G2like)/colamp-At1g68670-DAP-Seq(GSE60143)/Homer	WNWWHNRAAGATTCT	1	-0.5887	0.8561	50	0.0201	959.9	0.0204
TOD6?/SacCer-Promoters/Homer	GCGATGAGMT	1	-0.5759	0.8654	35	0.0141	674	0.0143
CUC2(NAC)/colamp-CUC2-DAP-Seq(GSE60143)/Homer	TRCKTGTNNNWCAMG	1	-0.5729	0.8667	50	0.0201	962.2	0.0205
AT3G12130(C3H)/colamp-AT3G12130-DAP-Seq(GSE60143)/Homer	TMACTTTTTV	1	-0.5684	0.8693	431	0.1735	8216.3	0.1746
IRF:BATF(IRF:bZIP)/pDC-Irf8-ChIP-Seq(GSE66899)/Homer	CTTTCANTATGACTV	1	-0.5676	0.8693	12	0.0048	232.4	0.0049
AT5G59990(C2C2COlike)/colamp-AT5G59990-DAP-Seq(GSE60143)/Homer	TCTCAACCGTTCATT	1	-0.5637	0.8706	4	0.0016	76	0.0016
STAT5(Stat)/mCD4+-Stat5-ChIP-Seq(GSE12346)/Homer	RTTTCTNAGAAA	1	-0.5631	0.8706	57	0.0229	1098.4	0.0233
SPL5(SBP)/colamp-SPL5-DAP-Seq(GSE60143)/Homer	NNHGTACGGHNN	1	-0.5576	0.8732	77	0.031	1482.4	0.0315
GATA1(C2C2gata)/colamp-GATA1-DAP-Seq(GSE60143)/Homer	DDWWYYAGATCTRRW	1	-0.5565	0.8732	61	0.0246	1176.8	0.025
ATHB15(HB)/col-ATHB15-DAP-Seq(GSE60143)/Homer	GYAATSATTA	1	-0.5388	0.887	31	0.0125	603.1	0.0128
AT1G23810(Orphan)/col-AT1G23810-DAP-Seq(GSE60143)/Homer	TTCTAGAAGSTTCTA	1	-0.5367	0.8875	7	0.0028	137.5	0.0029
ANAC013(NAC)/col-ANAC013-DAP-Seq(GSE60143)/Homer	CTTGNNNNNCAAGNA	1	-0.5278	0.8941	75	0.0302	1451.7	0.0309
BPC6(BBRBPC)/col-BPC6-DAP-Seq(GSE60143)/Homer	YTYTCTCTCTCTCTA	1	-0.5261	0.8941	20	0.0081	392.4	0.0083
MafB(bZIP)/BMM-Mafb-ChIP-Seq(GSE75722)/Homer	WNTGCTGASTCAGCANWTTY	1	-0.5259	0.8941	84	0.0338	1624.4	0.0345
Sox3(HMG)/NPC-Sox3-ChIP-Seq(GSE33059)/Homer	CCWTTGTY	1	-0.5223	0.8948	329	0.1324	6300.1	0.1339
BPC1(BBRBPC)/colamp-BPC1-DAP-Seq(GSE60143)/Homer	GARGAGAGAGAA	1	-0.5211	0.8948	140	0.0564	2697.8	0.0573
At1g25550(G2like)/colamp-At1g25550-DAP-Seq(GSE60143)/Homer	NAGATTCY	1	-0.5185	0.8954	181	0.0729	3481.4	0.074
ERF4(AP2EREBP)/colamp-ERF4-DAP-Seq(GSE60143)/Homer	WDWTGGCGGCGG	1	-0.5164	0.8959	395	0.159	7559.3	0.1607
Stat3(Stat)/mES-Stat3-ChIP-Seq(GSE11431)/Homer	CTTCCGGGAA	1	-0.5153	0.8959	117	0.0471	2259.6	0.048
Nkx6.1(Homeobox)/Islet-Nkx6.1-ChIP-Seq(GSE40975)/Homer	GKTAATGR	1	-0.5126	0.8965	361	0.1453	6914.1	0.147
RBFox2(?)/Heart-RBFox2-CLIP-Seq(GSE57926)/Homer	TGCATGCA	1	-0.5071	0.9001	433	0.1743	8287.2	0.1761
TCX2(CPP)/colamp-TCX2-DAP-Seq(GSE60143)/Homer	NNWWTTYRAAHN	1	-0.5066	0.9001	185	0.0745	3562.4	0.0757
Unknown6/Drosophila-Promoters/Homer	AATTTTAAAA	1	-0.5045	0.9001	71	0.0286	1380.3	0.0293
Unknown1(NR/Ini-like)/Drosophila-Promoters/Homer	MYGGTCACACTG	1	-0.5012	0.9013	45	0.0181	880.6	0.0187
Unknown3/Drosophila-Promoters/Homer	ACVAKCTGGCAGCGC	1	-0.4998	0.9013	23	0.0093	454.6	0.0097
SCL(bHLH)/HPC7-Scl-ChIP-Seq(GSE13511)/Homer	AVCAGCTG	1	-0.4978	0.9017	1246	0.5016	23720.5	0.5042
NFkB-p65-Rel(RHD)/ThioMac-LPS-Expression(GSE23622)/Homer	GGAAATTCCC	1	-0.496	0.9019	9	0.0036	180.5	0.0038
CELF2(RRM)/JSL1-CELF2-CLIP-Seq(GSE71264)/Homer	RGTGTCAG	1	-0.482	0.9132	80	0.0322	1559.5	0.0331
dof24(C2C2dof)/col-dof24-DAP-Seq(GSE60143)/Homer	TWMCTTTTTG	1	-0.474	0.9191	351	0.1413	6744.4	0.1433
RVE1(MYBrelated)/col-RVE1-DAP-Seq(GSE60143)/Homer	AAATATCT	1	-0.4681	0.9232	48	0.0193	945.2	0.0201
Mef2d(MADS)/Retina-Mef2d-ChIP-Seq(GSE61391)/Homer	GCTATTTTTAGC	1	-0.4675	0.9232	14	0.0056	282.1	0.006
RAP26(AP2EREBP)/colamp-RAP26-DAP-Seq(GSE60143)/Homer	HDATGGCGGCGG	1	-0.4614	0.9266	442	0.1779	8485.7	0.1804
At3g09600(MYBrelated)/colamp-At3g09600-DAP-Seq(GSE60143)/Homer	AAAATATCTT	1	-0.4606	0.9266	39	0.0157	772.7	0.0164
AT2G01818(PLATZ)/col-AT2G01818-DAP-Seq(GSE60143)/Homer	TCTAGAABSTTC	1	-0.4594	0.9266	30	0.0121	597.4	0.0127
Lhx1(Homeobox)/EmbryoCarcinoma-Lhx1-ChIP-Seq(GSE70957)/Homer	NNYTAATTAR	1	-0.4585	0.9266	134	0.0539	2604.2	0.0553
At5g65130(AP2EREBP)/colamp-At5g65130-DAP-Seq(GSE60143)/Homer	CCRCCGACAWTN	1	-0.4472	0.9342	74	0.0298	1453.8	0.0309
CBF2(AP2EREBP)/colamp-CBF2-DAP-Seq(GSE60143)/Homer	YBRCCGACATNNNNN	1	-0.4444	0.9355	99	0.0399	1936.2	0.0412
AT1G71450(AP2EREBP)/col-AT1G71450-DAP-Seq(GSE60143)/Homer	DHDWTGTCGGTG	1	-0.4437	0.9355	463	0.1864	8896.7	0.1891
Lhx2(Homeobox)/HFSC-Lhx2-ChIP-Seq(GSE48068)/Homer	TAATTAGN	1	-0.4416	0.9355	133	0.0535	2591.3	0.0551
bHLH10(bHLH)/colamp-bHLH10-DAP-Seq(GSE60143)/Homer	YACCGACA	1	-0.4384	0.9369	51	0.0205	1010.6	0.0215
STAT1(Stat)/HelaS3-STAT1-ChIP-Seq(GSE12782)/Homer	NATTTCCNGGAAAT	1	-0.4377	0.9369	46	0.0185	913.2	0.0194
AT1G01250(AP2EREBP)/col-AT1G01250-DAP-Seq(GSE60143)/Homer	YCACCGACAHTW	1	-0.428	0.9439	14	0.0056	287.7	0.0061
p53(p53)/mES-cMyc-ChIP-Seq(GSE11431)/Homer	ACATGCCCGGGCAT	1	-0.4218	0.9483	4	0.0016	85.4	0.0018
TINY(AP2EREBP)/col-TINY-DAP-Seq(GSE60143)/Homer	NNCACCGACA	1	-0.4204	0.9483	46	0.0185	917.9	0.0195
RARg(NR)/ES-RARg-ChIP-Seq(GSE30538)/Homer	AGGTCAAGGTCA	1	-0.4189	0.9483	22	0.0089	447.8	0.0095
ZNF416(Zf)/HEK293-ZNF416.GFP-ChIP-Seq(GSE58341)/Homer	WDNCTGGGCA	1	-0.418	0.9483	374	0.1506	7215.9	0.1534
CBF1(AP2EREBP)/colamp-CBF1-DAP-Seq(GSE60143)/Homer	YRCCGACATN	1	-0.4177	0.9483	154	0.062	3004	0.0638
IDD2(C2H2)/colamp-IDD2-DAP-Seq(GSE60143)/Homer	HAVAAAAMGACAAAA	1	-0.413	0.9497	14	0.0056	289.9	0.0062
MYB63(MYB)/col-MYB63-DAP-Seq(GSE60143)/Homer	BHYACCWACCHH	1	-0.4086	0.9525	96	0.0386	1890.7	0.0402
CRF10(AP2EREBP)/col100-CRF10-DAP-Seq(GSE60143)/Homer	DCCGCCGYHA	1	-0.4064	0.9531	503	0.2025	9683.8	0.2058
KANADI1(Myb)/Seedling-KAN1-ChIP-Seq(GSE48081)/Homer	ARGAATAWWN	1	-0.4028	0.9552	133	0.0535	2606.5	0.0554
JKD(C2H2)/col-JKD-DAP-Seq(GSE60143)/Homer	TTTTGTCGTTTT	1	-0.4022	0.9552	21	0.0085	430.4	0.0091
TRP2(MYBrelated)/colamp-TRP2-DAP-Seq(GSE60143)/Homer	TAAACCCT	1	-0.3946	0.9603	31	0.0125	629.9	0.0134
Unknown4/Arabidopsis-Promoters/Homer	CKTCKTCTTY	1	-0.3931	0.9603	238	0.0958	4628.3	0.0984
AT3G58630(Trihelix)/col-AT3G58630-DAP-Seq(GSE60143)/Homer	TCTCCGGCGA	1	-0.3906	0.9613	55	0.0221	1100.8	0.0234
Oct2(POU,Homeobox)/Bcell-Oct2-ChIP-Seq(GSE21512)/Homer	ATATGCAAAT	1	-0.387	0.9634	25	0.0101	512.7	0.0109
FOXA1:AR(Forkhead,NR)/LNCAP-AR-ChIP-Seq(GSE27824)/Homer	AGTAAACAAAAAAGAACAND	1	-0.3859	0.9634	8	0.0032	171.9	0.0037
STOP1(C2H2)/colamp-STOP1-DAP-Seq(GSE60143)/Homer	DTATCTGGKGRAGGT	1	-0.3827	0.9647	88	0.0354	1744	0.0371
IDD7(C2H2)/col-IDD7-DAP-Seq(GSE60143)/Homer	TTTGTCKTTTTN	1	-0.3807	0.9652	50	0.0201	1005.6	0.0214
Ascl1(bHLH)/NeuralTubes-Ascl1-ChIP-Seq(GSE55840)/Homer	NNVVCAGCTGBN	1	-0.3794	0.9652	460	0.1852	8882.9	0.1888
Zfp809(Zf)/ES-Zfp809-ChIP-Seq(GSE70799)/Homer	GGGGCTYGKCTGGGA	1	-0.3766	0.9664	63	0.0254	1260.2	0.0268
SeqBias: TA-repeat	TATATATATA	1	-0.3762	0.9664	271	0.1091	5270.5	0.112
Prop1(Homeobox)/GHFT1-PROP1.biotin-ChIP-Seq(GSE77302)/Homer	NTAATBNAATTA	1	-0.3748	0.9664	44	0.0177	889.8	0.0189
AGL6(MADS)/col-AGL6-DAP-Seq(GSE60143)/Homer	TTWCCWWAWWDGGWA	1	-0.3731	0.9664	9	0.0036	193.5	0.0041
At5g66730(C2H2)/colamp-At5g66730-DAP-Seq(GSE60143)/Homer	TTTGTCKTTTTK	1	-0.3719	0.9664	34	0.0137	693.2	0.0147
MYB40(MYB)/col-MYB40-DAP-Seq(GSE60143)/Homer	TGGTAGGTRARA	1	-0.3712	0.9664	58	0.0233	1164.8	0.0248
GATA3(Zf),DR4/iTreg-Gata3-ChIP-Seq(GSE20898)/Homer	AGATGKDGAGATAAG	1	-0.371	0.9664	7	0.0028	152.2	0.0032
AT1G10720(BSD)/col-AT1G10720-DAP-Seq(GSE60143)/Homer	TTCTAGAAKCTTCTA	1	-0.3705	0.9664	4	0.0016	89.8	0.0019
SPL3(SBP)/colamp-SPL3-DAP-Seq(GSE60143)/Homer	WDTTGTACGGAH	1	-0.3682	0.9664	8	0.0032	173.1	0.0037
RAP21(AP2EREBP)/colamp-RAP21-DAP-Seq(GSE60143)/Homer	BCACCGACAHNN	1	-0.3616	0.9684	31	0.0125	636.1	0.0135
Tcfcp2l1(CP2)/mES-Tcfcp2l1-ChIP-Seq(GSE11431)/Homer	NRAACCRGTTYRAACCRGYT	1	-0.3604	0.9684	40	0.0161	814.9	0.0173
AT1G77200(AP2EREBP)/colamp-AT1G77200-DAP-Seq(GSE60143)/Homer	ACCGACAHWD	1	-0.3474	0.9795	173	0.0696	3402.3	0.0723
MYB51(MYB)/col-MYB51-DAP-Seq(GSE60143)/Homer	GGTAGGTG	1	-0.3446	0.9809	182	0.0733	3577.5	0.076
RUNX(Runt)/HPC7-Runx1-ChIP-Seq(GSE22178)/Homer	SAAACCACAG	1	-0.3426	0.9814	149	0.06	2941.7	0.0625
SPL14(SBP)/col-SPL14-DAP-Seq(GSE60143)/Homer	NNWHTGTACGGAHNH	1	-0.3408	0.9818	28	0.0113	581.5	0.0124
OBP3(C2C2dof)/col-OBP3-DAP-Seq(GSE60143)/Homer	NYWACTTTTT	1	-0.3406	0.9818	524	0.211	10133.6	0.2154
HOXD13(Homeobox)/Chicken-Hoxd13-ChIP-Seq(GSE38910)/Homer	NCYAATAAAA	1	-0.3404	0.9818	113	0.0455	2245.2	0.0477
NFkB-p65(RHD)/GM12787-p65-ChIP-Seq(GSE19485)/Homer	WGGGGATTTCCC	1	-0.34	0.9818	96	0.0386	1916	0.0407
At5g62940(C2C2dof)/col-At5g62940-DAP-Seq(GSE60143)/Homer	WHWHHACTTTTT	1	-0.3362	0.9818	592	0.2383	11434.3	0.243
IRF4(IRF)/GM12878-IRF4-ChIP-Seq(GSE32465)/Homer	ACTGAAACCA	1	-0.3352	0.9818	72	0.029	1449.2	0.0308
HRE(HSF)/HepG2-HSF1-ChIP-Seq(GSE31477)/Homer	BSTTCTRGAABVTTCYAGAA	1	-0.3319	0.9823	28	0.0113	583.6	0.0124
AT2G40260(G2like)/colamp-AT2G40260-DAP-Seq(GSE60143)/Homer	WAAAYATTCTTT	1	-0.33	0.9827	197	0.0793	3874.3	0.0823
AT3G09735(S1Falike)/col-AT3G09735-DAP-Seq(GSE60143)/Homer	TTCTAGAANMTTCTA	1	-0.3293	0.9827	65	0.0262	1314.8	0.0279
REST-NRSF(Zf)/Jurkat-NRSF-ChIP-Seq/Homer	GGMGCTGTCCATGGTGCTGA	1	-0.3288	0.9827	2	0.0008	48.4	0.001
Pax7(Paired,Homeobox)/Myoblast-Pax7-ChIP-Seq(GSE25064)/Homer	TAATCAATTA	1	-0.3256	0.9829	6	0.0024	136.8	0.0029
AT3G52440(C2C2dof)/colamp-AT3G52440-DAP-Seq(GSE60143)/Homer	DTHACTTTTT	1	-0.3249	0.9829	359	0.1445	6990.6	0.1486
Nkx3.1(Homeobox)/LNCaP-Nkx3.1-ChIP-Seq(GSE28264)/Homer	AAGCACTTAA	1	-0.3223	0.9835	522	0.2101	10110.9	0.2149
SHN3(AP2EREBP)/col-SHN3-DAP-Seq(GSE60143)/Homer	CCGCCGCC	1	-0.3215	0.9835	223	0.0898	4380.7	0.0931
CDF3(C2C2dof)/colamp-CDF3-DAP-Seq(GSE60143)/Homer	AAAAGTRM	1	-0.3206	0.9835	284	0.1143	5554.6	0.1181
ATHB13(Homeobox)/col-ATHB13-DAP-Seq(GSE60143)/Homer	CAATAATT	1	-0.3148	0.9867	84	0.0338	1691.4	0.036
DREB2(AP2EREBP)/col-DREB2-DAP-Seq(GSE60143)/Homer	TMACCGACATWA	1	-0.3129	0.9873	96	0.0386	1926.2	0.0409
COG1(C2C2dof)/col-COG1-DAP-Seq(GSE60143)/Homer	DAAAAAGTGA	1	-0.3129	0.9873	215	0.0866	4231.9	0.0899
ZNF16(Zf)/HEK293-ZNF16.GFP-ChIP-Seq(GSE58341)/Homer	MACCTTCYATGGCTCCCTAKTGCCY	1	-0.3107	0.9873	1	0.0004	25.2	0.0005
AT4G18450(AP2EREBP)/col-AT4G18450-DAP-Seq(GSE60143)/Homer	ATGGCGGCKG	1	-0.3067	0.9892	223	0.0898	4389.3	0.0933
OBP1(C2C2dof)/col-OBP1-DAP-Seq(GSE60143)/Homer	NHHACTTTWT	1	-0.3066	0.9892	459	0.1848	8919.9	0.1896
CBF3(AP2EREBP)/colamp-CBF3-DAP-Seq(GSE60143)/Homer	YNRCCGACATNN	1	-0.3047	0.9892	101	0.0407	2027.9	0.0431
Rfx2(HTH)/LoVo-RFX2-ChIP-Seq(GSE49402)/Homer	GTTGCCATGGCAACM	1	-0.3043	0.9892	24	0.0097	509.2	0.0108
Six4(Homeobox)/MCF7-SIX4-ChIP-Seq(Encode)/Homer	TGWAAYCTGABACCB	1	-0.303	0.9892	7	0.0028	160.1	0.0034
Rfx5(HTH)/GM12878-Rfx5-ChIP-Seq(GSE31477)/Homer	SCCTAGCAACAG	1	-0.3015	0.9892	80	0.0322	1618.5	0.0344
ARF16(ARF)/col-ARF16-DAP-Seq(GSE60143)/Homer	ATTTTACGAT	1	-0.3002	0.9892	15	0.006	327.3	0.007
HSFB3(HSF)/colamp-HSFB3-DAP-Seq(GSE60143)/Homer	TTCTAGAAGMTTHTW	1	-0.2971	0.9893	8	0.0032	182.7	0.0039
RUNX1(Runt)/Jurkat-RUNX1-ChIP-Seq(GSE29180)/Homer	AAACCACARM	1	-0.2918	0.9931	215	0.0866	4244.8	0.0902
p63(p53)/Keratinocyte-p63-ChIP-Seq(GSE17611)/Homer	NNDRCATGYCYNRRCATGYH	1	-0.2896	0.994	82	0.033	1662.2	0.0353
E2FA(E2FDP)/colamp-E2FA-DAP-Seq(GSE60143)/Homer	WWTGGCGCCAWWWNN	1	-0.2861	0.9961	108	0.0435	2172.8	0.0462
ATHB6(Homeobox)/col-ATHB6-DAP-Seq(GSE60143)/Homer	AATGATTG	1	-0.2859	0.9961	122	0.0491	2445.6	0.052
Ptf1a(bHLH)/Panc1-Ptf1a-ChIP-Seq(GSE47459)/Homer	ACAGCTGTTN	1	-0.2851	0.9961	763	0.3072	14741.4	0.3133
AT2G20400(G2like)/colamp-AT2G20400-DAP-Seq(GSE60143)/Homer	DNVGAATATTCBNHN	1	-0.2843	0.9961	9	0.0036	205.9	0.0044
Isl1(Homeobox)/Neuron-Isl1-ChIP-Seq(GSE31456)/Homer	CTAATKGV	1	-0.2818	0.9961	321	0.1292	6293.9	0.1338
MYB107(MYB)/col-MYB107-DAP-Seq(GSE60143)/Homer	RGTWGGTRRR	1	-0.2813	0.9961	324	0.1304	6351	0.135
DAG2(C2C2dof)/col-DAG2-DAP-Seq(GSE60143)/Homer	WWTTHACTTTTT	1	-0.2764	0.9977	209	0.0841	4138.8	0.088
EIN3(EIL)/col-EIN3-DAP-Seq(GSE60143)/Homer	ARATTCAATGWATYT	1	-0.2725	1	10	0.004	228.7	0.0049
WRKY46(WRKY)/colamp-WRKY46-DAP-Seq(GSE60143)/Homer	AAAGTCAACGSN	1	-0.2696	1	8	0.0032	186.3	0.004
RAP212(AP2EREBP)/col-RAP212-DAP-Seq(GSE60143)/Homer	CGCCGCCATTTT	1	-0.2682	1	294	0.1184	5785	0.123
GATA(Zf),IR4/iTreg-Gata3-ChIP-Seq(GSE20898)/Homer	NAGATWNBNATCTNN	1	-0.2664	1	7	0.0028	165.5	0.0035
Initiator/Drosophila-Promoters/Homer	NTCAGTYG	1	-0.2662	1	495	0.1993	9644.2	0.205
AT4G37180(G2like)/col-AT4G37180-DAP-Seq(GSE60143)/Homer	AGAATCTTNN	1	-0.2657	1	192	0.0773	3816.2	0.0811
AT5G66940(C2C2dof)/col-AT5G66940-DAP-Seq(GSE60143)/Homer	NNHACTTTWT	1	-0.2656	1	294	0.1184	5786.2	0.123
At2g33710(AP2EREBP)/colamp-At2g33710-DAP-Seq(GSE60143)/Homer	WTKGCGGCKR	1	-0.2578	1	614	0.2472	11928.7	0.2535
AT3G16280(AP2EREBP)/colamp-AT3G16280-DAP-Seq(GSE60143)/Homer	HCACCGACAHHDHHN	1	-0.2544	1	64	0.0258	1322.4	0.0281
Hoxa13(Homeobox)/ChickenMSG-Hoxa13.Flag-ChIP-Seq(GSE86088)/Homer	CYHATAAAAN	1	-0.2539	1	348	0.1401	6836	0.1453
AT3G10580(MYBrelated)/colamp-AT3G10580-DAP-Seq(GSE60143)/Homer	TACCTAACWNHW	1	-0.2525	1	63	0.0254	1303.1	0.0277
At3g12730(G2like)/colamp-At3g12730-DAP-Seq(GSE60143)/Homer	AAGATTCT	1	-0.2456	1	214	0.0862	4256.7	0.0905
ERF11(AP2EREBP)/col-ERF11-DAP-Seq(GSE60143)/Homer	RTGGCGGCGG	1	-0.2439	1	357	0.1437	7017.2	0.1491
WRKY17(WRKY)/colamp-WRKY17-DAP-Seq(GSE60143)/Homer	GCGTTGACTTTT	1	-0.2436	1	1	0.0004	29.7	0.0006
CRX(Homeobox)/Retina-Crx-ChIP-Seq(GSE20012)/Homer	GCTAATCC	1	-0.2425	1	446	0.1795	8728.1	0.1855
AT3G60490(AP2EREBP)/colamp-AT3G60490-DAP-Seq(GSE60143)/Homer	NNRCCGACANNNNNN	1	-0.2384	1	51	0.0205	1070.2	0.0227
AT2G38300(G2like)/col-AT2G38300-DAP-Seq(GSE60143)/Homer	ADRGAATGTT	1	-0.2366	1	157	0.0632	3155.6	0.0671
SPL13(SBP)/col-SPL13-DAP-Seq(GSE60143)/Homer	WAHTGTACGGAH	1	-0.2362	1	15	0.006	340.5	0.0072
PHV(HB)/col-PHV-DAP-Seq(GSE60143)/Homer	RTAATSATTA	1	-0.2357	1	36	0.0145	770.6	0.0164
MYB44(MYB)/colamp-MYB44-DAP-Seq(GSE60143)/Homer	CVGTTWWKTCNGTTA	1	-0.2348	1	11	0.0044	256.1	0.0054
AGL13(MADS)/col-AGL13-DAP-Seq(GSE60143)/Homer	TWCCAWWTWTGGWAA	1	-0.2301	1	2	0.0008	56.6	0.0012
CES-1(Homeobox)/cElegans-L1-CES1-ChIP-Seq(modEncode)/Homer	AAATTSAATTTN	1	-0.228	1	38	0.0153	813.5	0.0173
ERF9(AP2EREBP)/colamp-ERF9-DAP-Seq(GSE60143)/Homer	AWATGGCGGCGG	1	-0.2273	1	145	0.0584	2927	0.0622
At3g45610(C2C2dof)/col-At3g45610-DAP-Seq(GSE60143)/Homer	TWACTTTTTS	1	-0.2272	1	230	0.0926	4580.8	0.0974
TCP7(TCP)/col-TCP7-DAP-Seq(GSE60143)/Homer	GTGGGSCCCACHHNN	1	-0.2271	1	125	0.0503	2536.8	0.0539
GATA15(C2C2gata)/col-GATA15-DAP-Seq(GSE60143)/Homer	KATGATCA	1	-0.2219	1	232	0.0934	4623.8	0.0983
NFkB-p50,p52(RHD)/Monocyte-p50-ChIP-Chip(Schreiber_et_al.)/Homer	GGGGGAATCCCC	1	-0.2207	1	25	0.0101	551.8	0.0117
MGP(C2H2)/colamp-MGP-DAP-Seq(GSE60143)/Homer	TTTTGTCGTTTW	1	-0.2203	1	29	0.0117	633.3	0.0135
GATA12(C2C2gata)/col-GATA12-DAP-Seq(GSE60143)/Homer	YAGATCTRAW	1	-0.2199	1	101	0.0407	2069.7	0.044
CBF4(AP2EREBP)/colamp-CBF4-DAP-Seq(GSE60143)/Homer	NRCCGACDWNNNNNN	1	-0.2189	1	144	0.058	2913.1	0.0619
AT3G57600(AP2EREBP)/col-AT3G57600-DAP-Seq(GSE60143)/Homer	GGCGGTGG	1	-0.2186	1	343	0.1381	6771.5	0.1439
At2g45680(TCP)/colamp-At2g45680-DAP-Seq(GSE60143)/Homer	GTGGGNCCCACNDND	1	-0.217	1	12	0.0048	281.1	0.006
Smad3(MAD)/NPC-Smad3-ChIP-Seq(GSE36673)/Homer	TWGTCTGV	1	-0.2159	1	750	0.3019	14573.2	0.3097
dof43(C2C2dof)/colamp-dof43-DAP-Seq(GSE60143)/Homer	NAAAAAGTDA	1	-0.2154	1	214	0.0862	4279.1	0.0909
Sp5(Zf)/mES-Sp5.Flag-ChIP-Seq(GSE72989)/Homer	RGKGGGCGGAGC	1	-0.2126	1	427	0.1719	8394.4	0.1784
PRDM10(Zf)/HEK293-PRDM10.eGFP-ChIP-Seq(Encode)/Homer	TGGTACATTCCA	1	-0.2114	1	137	0.0552	2781.5	0.0591
ATHB6(Homeobox)/Arabidopsis-HB6-ChIP-Seq(GSE80564)/Homer	CAATNATTBN	1	-0.2091	1	65	0.0262	1362.2	0.029
YY1(Zf)/Promoter/Homer	CAAGATGGCGGC	1	-0.2081	1	27	0.0109	596.6	0.0127
At4g16750(AP2EREBP)/col-At4g16750-DAP-Seq(GSE60143)/Homer	HACCGACAHA	1	-0.2053	1	156	0.0628	3157	0.0671
ERF104(AP2EREBP)/col-ERF104-DAP-Seq(GSE60143)/Homer	GGCGGCGG	1	-0.2026	1	445	0.1791	8751.4	0.186
p73(p53)/Trachea-p73-ChIP-Seq(PRJNA310161)/Homer	NRRRCAWGTCCDGRCATGYY	1	-0.2003	1	8	0.0032	198.6	0.0042
Tal1	CATCTG	1	-0.196	1	306	0.1232	6079.7	0.1292
SeqBias: A/T bias	WWWWWWWWWW	1	-0.196	1	1542	0.6208	29618.8	0.6295
LBD2(LOBAS2)/colamp-LBD2-DAP-Seq(GSE60143)/Homer	TCCGAWTTTTTCGGN	1	-0.1942	1	54	0.0217	1149.8	0.0244
bHLH130(bHLH)/col-bHLH130-DAP-Seq(GSE60143)/Homer	GCAACTTG	1	-0.1931	1	139	0.056	2833.7	0.0602
GATA4(C2C2gata)/col-GATA4-DAP-Seq(GSE60143)/Homer	DDWTYAGATCTR	1	-0.1921	1	121	0.0487	2480.4	0.0527
WUS1(Homeobox)/colamp-WUS1-DAP-Seq(GSE60143)/Homer	CAWTCATTCA	1	-0.1916	1	52	0.0209	1110.5	0.0236
HOXB13(Homeobox)/ProstateTumor-HOXB13-ChIP-Seq(GSE56288)/Homer	TTTTATKRGG	1	-0.1883	1	132	0.0531	2699.3	0.0574
ERF13(AP2EREBP)/colamp-ERF13-DAP-Seq(GSE60143)/Homer	TYAGCCGCCATT	1	-0.1834	1	403	0.1622	7965.4	0.1693
AT4G26030(C2H2)/col-AT4G26030-DAP-Seq(GSE60143)/Homer	BYYACCWACY	1	-0.1829	1	177	0.0713	3585.7	0.0762
T1ISRE(IRF)/ThioMac-Ifnb-Expression/Homer	ACTTTCGTTTCT	1	-0.1815	1	1	0.0004	34.6	0.0007
HDG7(HB)/col-HDG7-DAP-Seq(GSE60143)/Homer	WGCATTTAATGC	1	-0.1806	1	11	0.0044	268.1	0.0057
KLF6(Zf)/PDAC-KLF6-ChIP-Seq(GSE64557)/Homer	MKGGGYGTGGCC	1	-0.1742	1	399	0.1606	7899.3	0.1679
At2g44940(AP2EREBP)/colamp-At2g44940-DAP-Seq(GSE60143)/Homer	NYACCGACAHNNNNN	1	-0.1721	1	32	0.0129	712.8	0.0152
ERF73(AP2EREBP)/col-ERF73-DAP-Seq(GSE60143)/Homer	CCGCCGCC	1	-0.1715	1	346	0.1393	6879.8	0.1462
ESE1(AP2EREBP)/col-ESE1-DAP-Seq(GSE60143)/Homer	GGCGGCGG	1	-0.1654	1	379	0.1526	7524.6	0.1599
ZNF382(Zf)/HEK293-ZNF382.GFP-ChIP-Seq(GSE58341)/Homer	GNCTGTASTRNTGBCTCHTT	1	-0.1651	1	3	0.0012	89.5	0.0019
Znf263(Zf)/K562-Znf263-ChIP-Seq(GSE31477)/Homer	CVGTSCTCCC	1	-0.1635	1	587	0.2363	11529	0.245
Nkx2.2(Homeobox)/NPC-Nkx2.2-ChIP-Seq(GSE61673)/Homer	BTBRAGTGSN	1	-0.1632	1	470	0.1892	9281.2	0.1973
SCRT1(Zf)/HEK293-SCRT1.eGFP-ChIP-Seq(Encode)/Homer	GCAACAGGTG	1	-0.1608	1	66	0.0266	1408.2	0.0299
Smad2(MAD)/ES-SMAD2-ChIP-Seq(GSE29422)/Homer	CTGTCTGG	1	-0.1607	1	441	0.1775	8726.2	0.1855
LRF(Zf)/Erythroblasts-ZBTB7A-ChIP-Seq(GSE74977)/Homer	AAGACCCYYN	1	-0.1586	1	485	0.1952	9576	0.2035
OBP4(C2C2dof)/col-OBP4-DAP-Seq(GSE60143)/Homer	WTTHACTTTTTB	1	-0.1561	1	182	0.0733	3707.1	0.0788
GLIS3(Zf)/Thyroid-Glis3.GFP-ChIP-Seq(GSE103297)/Homer	CTCCCTGGGAGGCCN	1	-0.1518	1	451	0.1816	8931.8	0.1898
AT1G24250(Orphan)/col-AT1G24250-DAP-Seq(GSE60143)/Homer	KTDGTTGGTDGTTGG	1	-0.1511	1	56	0.0225	1212.5	0.0258
DEAR5(AP2EREBP)/col-DEAR5-DAP-Seq(GSE60143)/Homer	NDWTGTCGGTGRWDN	1	-0.1494	1	26	0.0105	597.8	0.0127
FAR1(FAR1)/col-FAR1-DAP-Seq(GSE60143)/Homer	TKNNNYYCACGCGCY	1	-0.1483	1	41	0.0165	908.7	0.0193
AT1G76870(Trihelix)/col-AT1G76870-DAP-Seq(GSE60143)/Homer	AAAACCRGWW	1	-0.147	1	46	0.0185	1011.8	0.0215
STAT6(Stat)/Macrophage-Stat6-ChIP-Seq(GSE38377)/Homer	TTCCKNAGAA	1	-0.1469	1	79	0.0318	1678.1	0.0357
Rap210(AP2EREBP)/col-Rap210-DAP-Seq(GSE60143)/Homer	TGTCGGCA	1	-0.1459	1	122	0.0491	2535.9	0.0539
SeqBias: CG-repeat	CGCGCGCGCG	1	-0.1448	1	727	0.2927	14239.5	0.3026
MYB88(MYB)/col-MYB88-DAP-Seq(GSE60143)/Homer	HNACGCTCCT	1	-0.1447	1	668	0.2689	13110.2	0.2786
AGL95(ND)/col-AGL95-DAP-Seq(GSE60143)/Homer	TTCTAGAAGCTTCTA	1	-0.1434	1	14	0.0056	344.7	0.0073
At3g04030(G2like)/col-At3g04030-DAP-Seq(GSE60143)/Homer	DRGAATCT	1	-0.143	1	134	0.0539	2775.4	0.059
ZNF692(Zf)/HEK293-ZNF692.GFP-ChIP-Seq(GSE58341)/Homer	GTGGGCCCCA	1	-0.1368	1	32	0.0129	729	0.0155
LCL1(MYBrelated)/colamp-LCL1-DAP-Seq(GSE60143)/Homer	NAAAATATCTWHWWN	1	-0.1353	1	9	0.0036	236.1	0.005
MYB99(MYB)/colamp-MYB99-DAP-Seq(GSE60143)/Homer	GGTAGGTG	1	-0.1344	1	171	0.0688	3513.3	0.0747
ZNF415(Zf)/HEK293-ZNF415.GFP-ChIP-Seq(GSE58341)/Homer	GRTGMTRGAGCC	1	-0.1329	1	153	0.0616	3160.8	0.0672
ERF10(AP2EREBP)/col-ERF10-DAP-Seq(GSE60143)/Homer	RTGGCGGCGG	1	-0.1319	1	313	0.126	6290.7	0.1337
GATA14(C2C2gata)/col-GATA14-DAP-Seq(GSE60143)/Homer	AYCAGATCTG	1	-0.1308	1	119	0.0479	2489.5	0.0529
ZML2(C2C2gata)/col-ZML2-DAP-Seq(GSE60143)/Homer	CATCATCATC	1	-0.1302	1	38	0.0153	856.4	0.0182
Brn1(POU,Homeobox)/NPC-Brn1-ChIP-Seq(GSE35496)/Homer	TATGCWAATBAV	1	-0.1296	1	29	0.0117	669.3	0.0142
Phox2b(Homeobox)/CLBGA-PHOX2B-ChIP-Seq(GSE90683)/Homer	TTAATTNAATTA	1	-0.1287	1	9	0.0036	238.8	0.0051
RUNX2(Runt)/PCa-RUNX2-ChIP-Seq(GSE33889)/Homer	NWAACCACADNN	1	-0.1283	1	163	0.0656	3362.4	0.0715
dof42(C2C2dof)/col-dof42-DAP-Seq(GSE60143)/Homer	AAAAAGGC	1	-0.1281	1	95	0.0382	2013.9	0.0428
ZSCAN22(Zf)/HEK293-ZSCAN22.GFP-ChIP-Seq(GSE58341)/Homer	SMCAGTCWGAKGGAGGAGGC	1	-0.1257	1	16	0.0064	395	0.0084
ZBTB12(Zf)/HEK293-ZBTB12.GFP-ChIP-Seq(GSE58341)/Homer	NGNTCTAGAACCNGV	1	-0.1235	1	101	0.0407	2137.3	0.0454
LEP(AP2EREBP)/col-LEP-DAP-Seq(GSE60143)/Homer	CDCCGCCGTC	1	-0.1218	1	171	0.0688	3527.4	0.075
STAT4(Stat)/CD4-Stat4-ChIP-Seq(GSE22104)/Homer	NYTTCCWGGAAR	1	-0.1213	1	162	0.0652	3350.6	0.0712
CAMTA1(CAMTA)/col-CAMTA1-DAP-Seq(GSE60143)/Homer	WWAACGCGTT	1	-0.1211	1	129	0.0519	2697.8	0.0573
MYB27(MYB)/colamp-MYB27-DAP-Seq(GSE60143)/Homer	TACCTAACWT	1	-0.1208	1	16	0.0064	396.1	0.0084
AT1G69570(C2C2dof)/col-AT1G69570-DAP-Seq(GSE60143)/Homer	WAAAAGTGHH	1	-0.1193	1	167	0.0672	3451.4	0.0734
MYB55(MYB)/colamp-MYB55-DAP-Seq(GSE60143)/Homer	YACCWAMC	1	-0.1179	1	192	0.0773	3945.6	0.0839
MYB92(MYB)/colamp-MYB92-DAP-Seq(GSE60143)/Homer	GGTAGGTR	1	-0.1176	1	202	0.0813	4142.5	0.088
HSFA6A(HSF)/col-HSFA6A-DAP-Seq(GSE60143)/Homer	RGAAGNTTCTAGAAN	1	-0.117	1	5	0.002	148.3	0.0032
HSF21(HSF)/col-HSF21-DAP-Seq(GSE60143)/Homer	CTTCTAGAAGMTTYW	1	-0.1136	1	13	0.0052	333.6	0.0071
RAV1(RAV)/colamp-RAV1-DAP-Seq(GSE60143)/Homer	TWWTTTCTGTTG	1	-0.1122	1	91	0.0366	1947.6	0.0414
ERF1(AP2EREBP)/colamp-ERF1-DAP-Seq(GSE60143)/Homer	GGCGGCTR	1	-0.1112	1	307	0.1236	6204.5	0.1319
EGL-5(Homeobox)/cElegans-L3-EGL5-ChIP-Seq(modEncode)/Homer	ATTTAATGGG	1	-0.1089	1	173	0.0696	3582.3	0.0761
ERF38(AP2EREBP)/col-ERF38-DAP-Seq(GSE60143)/Homer	CACCGACA	1	-0.1014	1	95	0.0382	2038.7	0.0433
AT2G28920(ND)/col-AT2G28920-DAP-Seq(GSE60143)/Homer	WAGATATTTWTW	1	-0.1007	1	16	0.0064	406	0.0086
At1g14580(C2H2)/colamp-At1g14580-DAP-Seq(GSE60143)/Homer	CASAAAAMGACAAAA	1	-0.1007	1	25	0.0101	600.9	0.0128
At5g52660(MYBrelated)/colamp-At5g52660-DAP-Seq(GSE60143)/Homer	HAAAAATATCTW	1	-0.09847	1	32	0.0129	750.8	0.016
KLF14(Zf)/HEK293-KLF14.GFP-ChIP-Seq(GSE58341)/Homer	RGKGGGCGKGGC	1	-0.09732	1	655	0.2637	12954	0.2753
MYB58(MYB)/colamp-MYB58-DAP-Seq(GSE60143)/Homer	YYYACCWACC	1	-0.09704	1	167	0.0672	3479.1	0.0739
MYB74(MYB)/colamp-MYB74-DAP-Seq(GSE60143)/Homer	YYYACCTACCWH	1	-0.09695	1	97	0.039	2083.3	0.0443
BBX31(Orphan)/col-BBX31-DAP-Seq(GSE60143)/Homer	NAAAAAGTDA	1	-0.09663	1	226	0.091	4643.8	0.0987
RBPJ:Ebox(?,bHLH)/Panc1-Rbpj1-ChIP-Seq(GSE47459)/Homer	GGGRAARRGRMCAGMTG	1	-0.09474	1	66	0.0266	1457.1	0.031
Bapx1(Homeobox)/VertebralCol-Bapx1-ChIP-Seq(GSE36672)/Homer	TTRAGTGSYK	1	-0.09433	1	488	0.1965	9745.5	0.2071
Tbox:Smad(T-box,MAD)/ESCd5-Smad2_3-ChIP-Seq(GSE29422)/Homer	AGGTGHCAGACA	1	-0.08772	1	36	0.0145	842.2	0.0179
TCP3(TCP)/colamp-TCP3-DAP-Seq(GSE60143)/Homer	WGTGGTCCCAAHWWW	1	-0.08708	1	53	0.0213	1197.9	0.0255
bHLH18(bHLH)/col-bHLH18-DAP-Seq(GSE60143)/Homer	CACGTGTTYCACGTG	1	-0.08679	1	2	0.0008	78.4	0.0017
NFAT:AP1(RHD,bZIP)/Jurkat-NFATC1-ChIP-Seq(Jolma_et_al.)/Homer	SARTGGAAAAWRTGAGTCAB	1	-0.0858	1	18	0.0072	457.7	0.0097
HEB(bHLH)/mES-Heb-ChIP-Seq(GSE53233)/Homer	VCAGCTGBNN	1	-0.08522	1	555	0.2234	11059	0.2351
Six1(Homeobox)/Myoblast-Six1-ChIP-Chip(GSE20150)/Homer	GKVTCADRTTWC	1	-0.08172	1	32	0.0129	762.6	0.0162
CRC(C2C2YABBY)/col-CRC-DAP-Seq(GSE60143)/Homer	TWATSATA	1	-0.08121	1	114	0.0459	2444.1	0.0519
SGR5(C2H2)/colamp-SGR5-DAP-Seq(GSE60143)/Homer	TTTGTCTTTTTT	1	-0.08037	1	95	0.0382	2062.3	0.0438
HINFP(Zf)/K562-HINFP.eGFP-ChIP-Seq(Encode)/Homer	TWVGGTCCGC	1	-0.07968	1	141	0.0568	2987.6	0.0635
Klf4(Zf)/mES-Klf4-ChIP-Seq(GSE11431)/Homer	GCCACACCCA	1	-0.07967	1	127	0.0511	2707.5	0.0575
KLF5(Zf)/LoVo-KLF5-ChIP-Seq(GSE49402)/Homer	DGGGYGKGGC	1	-0.07963	1	497	0.2001	9953.2	0.2115
STAT6(Stat)/CD4-Stat6-ChIP-Seq(GSE22104)/Homer	ABTTCYYRRGAA	1	-0.07934	1	71	0.0286	1575.8	0.0335
ZNF41(Zf)/HEK293-ZNF41.GFP-ChIP-Seq(GSE58341)/Homer	CCTCATGGTGYCYTWYTCCCTTGTG	1	-0.07263	1	2	0.0008	82.3	0.0017
RRTF1(AP2EREBP)/colamp-RRTF1-DAP-Seq(GSE60143)/Homer	CCGCCGCHATTT	1	-0.0726	1	58	0.0233	1315.7	0.028
ERF2(AP2EREBP)/colamp-ERF2-DAP-Seq(GSE60143)/Homer	GGCGGCTG	1	-0.07161	1	343	0.1381	6982.5	0.1484
ERF8(AP2EREBP)/colamp-ERF8-DAP-Seq(GSE60143)/Homer	CGCCGYCATW	1	-0.07138	1	374	0.1506	7588	0.1613
JGL(C2H2)/col-JGL-DAP-Seq(GSE60143)/Homer	ACYTTCAGTT	1	-0.06963	1	282	0.1135	5793.1	0.1231
KLF3(Zf)/MEF-Klf3-ChIP-Seq(GSE44748)/Homer	NRGCCCCRCCCHBNN	1	-0.06892	1	203	0.0817	4239	0.0901
PTF1(TCP)/colamp-PTF1-DAP-Seq(GSE60143)/Homer	RDDGGGACCACA	1	-0.06769	1	16	0.0064	424.9	0.009
AS2(LOBAS2)/col-AS2-DAP-Seq(GSE60143)/Homer	CCGDAAWWHMCGSCG	1	-0.06505	1	25	0.0101	625.7	0.0133
ZEB2(Zf)/SNU398-ZEB2-ChIP-Seq(GSE103048)/Homer	GNMCAGGTGTGC	1	-0.06488	1	282	0.1135	5804.4	0.1234
MYNN(Zf)/HEK293-MYNN.eGFP-ChIP-Seq(Encode)/Homer	TTCAAAWTAAAAGTC	1	-0.06408	1	24	0.0097	604.3	0.0128
CEBP:CEBP(bZIP)/MEF-Chop-ChIP-Seq(GSE35681)/Homer	NTNATGCAAYMNNHTGMAAY	1	-0.06301	1	13	0.0052	359.7	0.0076
WT1(Zf)/Kidney-WT1-ChIP-Seq(GSE90016)/Homer	MCTCCCMCRCAB	1	-0.06299	1	184	0.0741	3873.8	0.0823
PAX6(Paired,Homeobox)/Forebrain-Pax6-ChIP-Seq(GSE66961)/Homer	NGTGTTCAVTSAAGCGKAAA	1	-0.06248	1	11	0.0044	313.1	0.0067
MYB10(MYB)/col-MYB10-DAP-Seq(GSE60143)/Homer	YCCACCTACCHH	1	-0.0624	1	71	0.0286	1596.2	0.0339
ATHB21(HB)/colamp-ATHB21-DAP-Seq(GSE60143)/Homer	YCAATWAT	1	-0.06225	1	42	0.0169	992.1	0.0211
FRS9(ND)/col-FRS9-DAP-Seq(GSE60143)/Homer	RGAGAGAGAAAG	1	-0.06081	1	66	0.0266	1495.2	0.0318
MYB94(MYB)/col-MYB94-DAP-Seq(GSE60143)/Homer	WGGTRGTTGGKA	1	-0.05607	1	74	0.0298	1667.6	0.0354
GLI3(Zf)/Limb-GLI3-ChIP-Chip(GSE11077)/Homer	CGTGGGTGGTCC	1	-0.05525	1	25	0.0101	634.8	0.0135
ASHR1(ND)/col-ASHR1-DAP-Seq(GSE60143)/Homer	NTGGTGAN	1	-0.05492	1	274	0.1103	5672.9	0.1206
ATHB40(HB)/col-ATHB40-DAP-Seq(GSE60143)/Homer	HCAATWATTG	1	-0.05446	1	62	0.025	1421.8	0.0302
PCF/Arabidopsis-Promoters/Homer	NNWWWTGGGCYTDDN	1	-0.05418	1	26	0.0105	657.3	0.014
Ik-1	NHTTGGGAATRCC	1	-0.0528	1	2484	1	47049.6	1
HSF6(HSF)/col-HSF6-DAP-Seq(GSE60143)/Homer	TTYTAGAAGCTTCTA	1	-0.05216	1	27	0.0109	681.5	0.0145
bcd(Homeobox)/Embryo-Bcd-ChIP-Seq(GSE86966)/Homer	VNNGGATTADNN	1	-0.05169	1	206	0.0829	4336.1	0.0922
MYB83(MYB)/colamp-MYB83-DAP-Seq(GSE60143)/Homer	CACCAACCWH	1	-0.05012	1	320	0.1288	6590.4	0.1401
NRF1(NRF)/MCF7-NRF1-ChIP-Seq(Unpublished)/Homer	CTGCGCATGCGC	1	-0.04938	1	66	0.0266	1512.1	0.0321
MYB67(MYB)/col-MYB67-DAP-Seq(GSE60143)/Homer	YYYACCTAAC	1	-0.04684	1	159	0.064	3410.6	0.0725
MYB13(MYB)/col-MYB13-DAP-Seq(GSE60143)/Homer	HYCACCWACCHH	1	-0.04568	1	127	0.0511	2768.9	0.0589
Oct6(POU,Homeobox)/NPC-Pou3f1-ChIP-Seq(GSE35496)/Homer	WATGCAAATGAG	1	-0.04505	1	36	0.0145	885.7	0.0188
CDM1(C3H)/colamp-CDM1-DAP-Seq(GSE60143)/Homer	CCGAWAWTWTCGGAN	1	-0.04461	1	12	0.0048	350.8	0.0075
HAT5(Homeobox)/colamp-HAT5-DAP-Seq(GSE60143)/Homer	DCAATWATTG	1	-0.04362	1	6	0.0024	204.9	0.0044
OCT4-SOX2-TCF-NANOG(POU,Homeobox,HMG)/mES-Oct4-ChIP-Seq(GSE11431)/Homer	ATTTGCATAACAATG	1	-0.04234	1	9	0.0036	281	0.006
ERF5(AP2EREBP)/colamp-ERF5-DAP-Seq(GSE60143)/Homer	DCMGCCGCCA	1	-0.04193	1	225	0.0906	4741.3	0.1008
ATY19(MYB)/col-ATY19-DAP-Seq(GSE60143)/Homer	YYCACCWACCAT	1	-0.04114	1	131	0.0527	2860.2	0.0608
AT1G12630(AP2EREBP)/colamp-AT1G12630-DAP-Seq(GSE60143)/Homer	TGTCGGCA	1	-0.04035	1	91	0.0366	2046.6	0.0435
Gfi1b(Zf)/HPC7-Gfi1b-ChIP-Seq(GSE22178)/Homer	MAATCACTGC	1	-0.03966	1	108	0.0435	2396.2	0.0509
KAN2(G2like)/colamp-KAN2-DAP-Seq(GSE60143)/Homer	ATATTCTY	1	-0.03801	1	153	0.0616	3313	0.0704
DPL-1(E2F)/cElegans-Adult-ChIP-Seq(modEncode)/Homer	TAGCGCGC	1	-0.03753	1	311	0.1252	6457.5	0.1372
Adof1(C2C2dof)/col-Adof1-DAP-Seq(GSE60143)/Homer	NRWAAAGYDV	1	-0.03635	1	456	0.1836	9301.1	0.1977
Brn2(POU,Homeobox)/NPC-Brn2-ChIP-Seq(GSE35496)/Homer	ATGAATATTC	1	-0.03459	1	3	0.0012	129.7	0.0028
ERF105(AP2EREBP)/colamp-ERF105-DAP-Seq(GSE60143)/Homer	TGGCGGCT	1	-0.03235	1	513	0.2065	10430.3	0.2217
NFY(CCAAT)/Promoter/Homer	RGCCAATSRG	1	-0.03169	1	181	0.0729	3897.4	0.0828
Pitx1(Homeobox)/Chicken-Pitx1-ChIP-Seq(GSE38910)/Homer	TAATCCCN	1	-0.02852	1	794	0.3196	15879.9	0.3375
ERF7(AP2EREBP)/col-ERF7-DAP-Seq(GSE60143)/Homer	ATGRCGGCGG	1	-0.02779	1	451	0.1816	9248	0.1966
PSE(SNAPc)/K562-mStart-Seq/Homer	WAVTCACCMTAASYDAAAAG	1	-0.02674	1	62	0.025	1475.8	0.0314
CRF4(AP2EREBP)/colamp-CRF4-DAP-Seq(GSE60143)/Homer	CGCCGCCA	1	-0.0261	1	284	0.1143	5975.1	0.127
ERF3(AP2EREBP)/colamp-ERF3-DAP-Seq(GSE60143)/Homer	ATGGCGGCGG	1	-0.02579	1	276	0.1111	5818.1	0.1237
AT1G72740(MYBrelated)/colamp-AT1G72740-DAP-Seq(GSE60143)/Homer	NNWWAMCCTAAHWNN	1	-0.02535	1	172	0.0692	3741	0.0795
AT5G02460(C2C2dof)/col-AT5G02460-DAP-Seq(GSE60143)/Homer	CHCCTTTT	1	-0.0229	1	337	0.1357	7041.8	0.1497
Pit1(Homeobox)/GCrat-Pit1-ChIP-Seq(GSE58009)/Homer	ATGMATATDC	1	-0.02245	1	98	0.0395	2242.1	0.0477
E2A(bHLH)/proBcell-E2A-ChIP-Seq(GSE21978)/Homer	DNRCAGCTGY	1	-0.02114	1	419	0.1687	8665.7	0.1842
Nkx2.5(Homeobox)/HL1-Nkx2.5.biotin-ChIP-Seq(GSE21529)/Homer	RRSCACTYAA	1	-0.02007	1	491	0.1977	10081.3	0.2143
TATA-Box(TBP)/Promoter/Homer	CCTTTTAWAGSC	1	-0.01909	1	187	0.0753	4075.9	0.0866
TCP16(TCP)/colamp-TCP16-DAP-Seq(GSE60143)/Homer	GTGGDCCYNNNNNNN	1	-0.01872	1	148	0.0596	3286.3	0.0698
MYB17(MYB)/colamp-MYB17-DAP-Seq(GSE60143)/Homer	GGTAGGTGRG	1	-0.01666	1	108	0.0435	2475.9	0.0526
At5g29000(G2like)/col-At5g29000-DAP-Seq(GSE60143)/Homer	RGAATATTCYHH	1	-0.01368	1	18	0.0072	541.8	0.0115
dof45(C2C2dof)/col-dof45-DAP-Seq(GSE60143)/Homer	NVAWAAAGTN	1	-0.01364	1	365	0.1469	7666.5	0.1629
SFP1/SacCer-Promoters/Homer	DDAAAAATTTTY	1	-0.01253	1	1	0.0004	83.4	0.0018
FUS3(ABI3VP1)/col-FUS3-DAP-Seq(GSE60143)/Homer	DNNWTNTGCATGKNN	1	-0.01247	1	162	0.0652	3612.3	0.0768
GAGA-repeat/Arabidopsis-Promoters/Homer	CTCTCTCTCY	1	-0.01245	1	304	0.1224	6469.8	0.1375
AT2G33550(Trihelix)/colamp-AT2G33550-DAP-Seq(GSE60143)/Homer	TTTAAGGGCAYTTTT	1	-0.01234	1	275	0.1107	5892.4	0.1252
Sp1(Zf)/Promoter/Homer	GGCCCCGCCCCC	1	-0.01227	1	142	0.0572	3204.7	0.0681
Sox9(HMG)/Limb-SOX9-ChIP-Seq(GSE73225)/Homer	AGGVNCCTTTGT	1	-0.01134	1	145	0.0584	3273.5	0.0696
Egr2(Zf)/Thymocytes-Egr2-ChIP-Seq(GSE34254)/Homer	NGCGTGGGCGGR	1	-0.01042	1	56	0.0225	1410.4	0.03
VRN1(ABI3VP1)/col-VRN1-DAP-Seq(GSE60143)/Homer	TTTTTTTTTT	1	-0.008482	1	23	0.0093	680.6	0.0145
AT5G45580(G2like)/colamp-AT5G45580-DAP-Seq(GSE60143)/Homer	ADRGAATCTH	1	-0.008333	1	221	0.089	4852.5	0.1031
OCT:OCT(POU,Homeobox)/NPC-OCT6-ChIP-Seq(GSE43916)/Homer	YATGCATATRCATRT	1	-0.007896	1	5	0.002	226.1	0.0048
PRDM14(Zf)/H1-PRDM14-ChIP-Seq(GSE22767)/Homer	RGGTCTCTAACY	1	-0.007832	1	49	0.0197	1274.2	0.0271
At4g38000(C2C2dof)/col-At4g38000-DAP-Seq(GSE60143)/Homer	WWWTWACTTTTT	1	-0.007702	1	108	0.0435	2539.9	0.054
At3g24120(G2like)/col-At3g24120-DAP-Seq(GSE60143)/Homer	NWWAGMATMW	1	-0.007081	1	569	0.2291	11763.1	0.25
Klf9(Zf)/GBM-Klf9-ChIP-Seq(GSE62211)/Homer	GCCACRCCCACY	1	-0.006664	1	146	0.0588	3342.1	0.071
MYB93(MYB)/colamp-MYB93-DAP-Seq(GSE60143)/Homer	GGTAGGTGRD	1	-0.006017	1	199	0.0801	4439.4	0.0944
MYB3(MYB)/Arabidopsis-MYB3-ChIP-Seq(GSE80564)/Homer	GKTAGGTRGG	1	-0.005592	1	367	0.1477	7822.8	0.1663
MYB96(MYB)/colamp-MYB96-DAP-Seq(GSE60143)/Homer	WGGTRGTTGG	1	-0.005515	1	165	0.0664	3752	0.0797
Otx2(Homeobox)/EpiLC-Otx2-ChIP-Seq(GSE56098)/Homer	NYTAATCCYB	1	-0.005383	1	123	0.0495	2882.5	0.0613
Egr1(Zf)/K562-Egr1-ChIP-Seq(GSE32465)/Homer	TGCGTGGGYG	1	-0.005114	1	221	0.089	4903.7	0.1042
ARF2(ARF)/col-ARF2-DAP-Seq(GSE60143)/Homer	TTGTCGGMWN	1	-0.004643	1	710	0.2858	14567.7	0.3096
At2g01060(G2like)/colamp-At2g01060-DAP-Seq(GSE60143)/Homer	AGATKCBNWW	1	-0.0038	1	501	0.2017	10519.9	0.2236
Maz(Zf)/HepG2-Maz-ChIP-Seq(GSE31477)/Homer	GGGGGGGG	1	-0.003591	1	481	0.1936	10133.1	0.2154
GSC(Homeobox)/FrogEmbryos-GSC-ChIP-Seq(DRA000576)/Homer	RGGATTAR	1	-0.002947	1	171	0.0688	3931.1	0.0836
REM19(REM)/colamp-REM19-DAP-Seq(GSE60143)/Homer	AAAAAAAA	1	-0.002608	1	66	0.0266	1714.5	0.0364
MYB61(MYB)/colamp-MYB61-DAP-Seq(GSE60143)/Homer	HCYACCTACC	1	-0.002581	1	263	0.1059	5825.8	0.1238
Nkx2.1(Homeobox)/LungAC-Nkx2.1-ChIP-Seq(GSE43252)/Homer	RSCACTYRAG	1	-0.001653	1	670	0.2697	13937.4	0.2962
RLR1?/SacCer-Promoters/Homer	WTTTTCYYTTTT	1	-0.001392	1	56	0.0225	1527.8	0.0325
[truncated: 29 more rows]

## Sheet: COUP-TFII_Neg_Diff_Enriched
Motif Name	Consensus	P-value	Log P-value	q-value (Benjamini)	# of Target Sequences with Motif(of 8794)	% of Target Sequences with Motif	# of Background Sequences with Motif(of 40948)	% of Background Sequences with Motif
[truncated: 976 more rows]

[truncated: 3 more sheets: HNF4α_All_Diff_Enriched, HNF4α_Pos_Diff_Enriched, HNF4α_Neg_Diff_Enriched]
