# Supplementary material for: Genome-Wide ChIPseq Analysis of AhR, COUP-TF, and HNF4 Enrichment in TCDD-Treated Mouse Liver
Source: Int J Mol Sci. 2022 Jan 29;23(3):1558. doi: 10.3390/ijms23031558 (PMC8836158; doi:10.3390/ijms23031558)
Supplement: Supplementary file 1 [file ijms-23-01558-s001.zip › Supplemenatry_File S2.xlsx]

## Sheet: output_Ahr_Couptf_Hnf_30_DEGs
TermID	genes	all	pval	padj
TZ_DIURNAL_GENES	1222	5613	0	0
TZ_SCS_PORTALHEP	326	581	6.34972e-273	6.90501e-269
TZ_SCS_MIDCENTRALHEP	292	563	2.43338e-230	1.76412e-226
TZ_SCS_CENTRALHEP	203	466	6.59742e-140	3.58718e-136
GO_CC_MM_MITOCHONDRION	308	1328	1.5644e-123	6.80481e-120
KEGG_MM_METABOLIC_PATHWAYS	290	1180	4.38644e-123	1.59001e-119
HEPG2_SECRETOME	216	757	4.91468e-105	1.52699e-101
PHH_SECRETOME	211	726	2.67309e-104	7.26714e-101
TZ_LIVER	103	181	1.56117e-86	3.77266e-83
GO_CC_MM_CYTOSOL	210	927	1.38722e-81	3.01706e-78
TZ_SCS_MIDPORTALHEP	81	149	4.49344e-66	8.88436e-63
GO_MF_MM_ATP_BINDING	240	1454	1.77631e-64	3.21942e-61
TZ_MALE_ENRICHED	113	367	6.42955e-59	1.07566e-55
GO_BP_MM_METABOLIC_PROCESS	131	521	1.31944e-56	2.04974e-53
GO_MF_MM_METAL_ION_BINDING	168	871	1.13005e-54	1.6385e-51
TZ_SCS_MACROPHAGES	171	904	2.17555e-54	2.95726e-51
GO_MF_MM_PROTEIN_HOMODIMERIZATION_ACTIVITY	125	509	8.01952e-53	9.79318e-50
TZ_SCS_ENDOTHELIALCELLS	119	461	8.10507e-53	9.79318e-50
GO_BP_MM_OXIDATION-REDUCTION_PROCESS	128	535	1.09083e-52	1.24866e-49
GO_MF_MM_CATALYTIC_ACTIVITY	143	672	4.91247e-52	5.34206e-49
GO_CC_MM_MICROSOME	90	271	2.83255e-50	2.93358e-47
TZ_SCS_STELLATECELLS	112	432	5.63778e-50	5.57346e-47
TZ_FEMALE_ENRICHED	102	359	1.23465e-49	1.16749e-46
GO_CC_MM_MEMBRANE	212	1517	6.57278e-45	5.95631e-42
GO_CC_MM_ENDOPLASMIC_RETICULUM_MEMBRANE	110	482	2.64859e-43	2.30416e-40
GO_BP_MM_SIGNAL_TRANSDUCTION	139	753	4.62243e-43	3.86666e-40
NETPATH_MM_EGFR1_SIGNALING_PATHWAY	104	439	1.40031e-42	1.12797e-39
GO_MF_MM_ZINC_ION_BINDING	204	1480	2.6161e-42	2.03206e-39
GO_CC_MM_ENDOPLASMIC_RETICULUM	114	541	3.13539e-41	2.35143e-38
MPO_MM_ABNORMAL_LIPID_HOMEOSTASIS	59	137	6.23204e-41	4.51802e-38
TZ_SCS_CHOLANGIOCYTES	77	252	2.90862e-40	2.04063e-37
GO_CC_MM_EXTRACELLULAR_SPACE	131	753	8.42045e-38	5.72301e-35
GO_MF_MM_OXIDOREDUCTASE_ACTIVITY	85	337	3.12527e-37	2.05974e-34
GO_CC_MM_MITOCHONDRIAL_INNER_MEMBRANE	78	290	2.1296e-36	1.36225e-33
GO_BP_MM_TRANSCRIPTION_DNA-DEPENDENT	179	1321	3.4253e-36	2.12848e-33
GO_MF_MM_DNA_BINDING	194	1546	1.48809e-34	8.99014e-32
MPO_MM_HEPATIC_STEATOSIS	55	155	5.7401e-33	3.37409e-30
MPO_MM_ABNORMAL_LIVER_MORPHOLOGY	61	196	1.08245e-32	6.19534e-30
TFACTS_MM_SP1	84	383	5.01062e-32	2.79426e-29
GO_BP_MM_RESPONSE_TO_DRUG	75	321	1.20678e-30	6.56155e-28
MPO_MM_DECREASED_CIRCULATING_TRIGLYCERIDE_LEVEL	45	109	1.38708e-30	7.35794e-28
MPO_MM_DECREASED_CIRCULATING_GLUCOSE_LEVEL	52	152	2.3812e-30	1.23307e-27
GO_BP_MM_POSITIVE_REGULATION_OF_TRANSCRIPTION_FROM_RNA_POLYMERASE_II_PROMOTER	108	646	7.9331e-30	4.01249e-27
MPO_MM_ABNORMAL_HEPATOCYTE_MORPHOLOGY	47	126	1.63524e-29	8.0829e-27
MPO_MM_INCREASED_CIRCULATING_TRIGLYCERIDE_LEVEL	44	112	7.66915e-29	3.70659e-26
GO_MF_MM_NUCLEOTIDE_BINDING	107	661	2.35517e-28	1.11353e-25
GO_BP_MM_REGULATION_OF_TRANSCRIPTION_DNA-DEPENDENT	175	1483	4.90697e-28	2.27068e-25
MPO_MM_COMPLETE_PRENATAL_LETHALITY	72	324	5.03731e-28	2.28243e-25
MPO_MM_PARTIAL_NEONATAL_LETHALITY	69	300	7.23793e-28	3.21261e-25
GO_BP_MM_NEGATIVE_REGULATION_OF_TRANSCRIPTION_FROM_RNA_POLYMERASE_II_PROMOTER	89	489	1.59635e-27	6.9438e-25
MPO_MM_ABNORMAL_BLOOD_HOMEOSTASIS	41	102	1.92132e-27	8.19347e-25
GO_MF_MM_SEQUENCE-SPECIFIC_DNA_BINDING_TRANSCRIPTION_FACTOR_ACTIVITY	116	783	3.80112e-27	1.58982e-24
GO_BP_MM_APOPTOTIC_PROCESS	86	468	6.05666e-27	2.4854e-24
EHMN_MM_LEUKOTRIENE_METABOLISM	37	83	7.20377e-27	2.90139e-24
MICROCOSM_TARGETS_MM_HSA-MIR-195	73	347	8.0741e-27	3.19279e-24
GO_MF_MM_PHOSPHOLIPID_BINDING	69	312	8.76798e-27	3.40526e-24
MPO_MM_DECREASED_CIRCULATING_CHOLESTEROL_LEVEL	41	106	1.16737e-26	4.45425e-24
GO_BP_MM_PROTEIN_PHOSPHORYLATION	97	591	2.73136e-26	1.02421e-23
GO_BP_MM_NEGATIVE_REGULATION_OF_APOPTOTIC_PROCESS	68	310	3.3929e-26	1.25072e-23
GO_CC_MM_MITOCHONDRIAL_MATRIX	43	124	1.26442e-25	4.58333e-23
GO_CC_MM_SOLUBLE_FRACTION	66	300	1.52048e-25	5.42114e-23
GO_BP_MM_CHOLESTEROL_METABOLIC_PROCESS	31	59	1.58995e-25	5.5774e-23
REACTOME_MM_AKT1_PATHWAY	54	203	2.20706e-25	7.61927e-23
KEGG_MM_PATHWAYS_IN_CANCER	68	321	2.90173e-25	9.86088e-23
MPO_MM_INCREASED_CIRCULATING_INSULIN_LEVEL	48	160	3.04179e-25	1.01778e-22
GO_CC_MM_PEROXISOME	38	97	4.69675e-25	1.54772e-22
TFACTS_MM_HNF4A	33	71	7.54171e-25	2.44813e-22
MPO_MM_PARTIAL_PRENATAL_LETHALITY	68	329	1.29653e-24	4.14678e-22
MPO_MM_ABNORMAL_LIVER_PHYSIOLOGY	38	100	1.74342e-24	5.49532e-22
KEGG_MM_PI3K-AKT_SIGNALING_PATHWAY	69	340	1.81035e-24	5.62476e-22
GO_MF_MM_IDENTICAL_PROTEIN_BINDING	66	313	1.91475e-24	5.86534e-22
GO_MF_MM_PROTEIN_HETERODIMERIZATION_ACTIVITY	63	287	2.15114e-24	6.49795e-22
MPO_MM_INSULIN_RESISTANCE	40	113	2.49745e-24	7.44068e-22
MPO_MM_ENLARGED_SPLEEN	66	315	2.79041e-24	8.20117e-22
GO_MF_MM_ENZYME_BINDING	51	190	2.98934e-24	8.66868e-22
MIRTARBASE_MM_HSA-MIR-124	45	147	3.64326e-24	1.04259e-21
KEGG_MM_COMPLEMENT_AND_COAGULATION_CASCADES	33	74	3.98285e-24	1.12497e-21
GO_BP_MM_LIVER_DEVELOPMENT	35	85	4.59407e-24	1.28098e-21
GO_MF_MM_HYDROLASE_ACTIVITY	65	312	8.61718e-24	2.37234e-21
MPO_MM_INCREASED_CIRCULATING_CHOLESTEROL_LEVEL	41	123	9.62763e-24	2.61739e-21
GO_CC_MM_MEMBRANE_FRACTION	72	388	4.80284e-23	1.28959e-20
MICROCOSM_TARGETS_MM_HSA-MIR-877	72	393	1.04922e-22	2.78287e-20
MICROCOSM_TARGETS_MM_HSA-MIR-194	73	403	1.06734e-22	2.79681e-20
GO_BP_MM_LIPID_METABOLIC_PROCESS	41	131	1.47342e-22	3.81494e-20
MPO_MM_ABNORMAL_GLUCOSE_HOMEOSTASIS	47	176	2.31558e-22	5.92488e-20
EHMN_MM_TYROSINE_METABOLISM	36	101	3.67436e-22	9.29228e-20
MPO_MM_LIVER_INFLAMMATION	39	121	4.72391e-22	1.18092e-19
GO_MF_MM_TRANSFERASE_ACTIVITY_TRANSFERRING_PHOSPHORUS-CONTAINING_GROUPS	85	539	4.96782e-22	1.22779e-19
WIKIPATHWAYS_MM_ADIPOGENESIS-WP236	40	128	5.12963e-22	1.25353e-19
GO_MF_MM_PROTEIN_KINASE_ACTIVITY	84	533	9.06615e-22	2.19089e-19
MPO_MM_EMBRYONIC_GROWTH_RETARDATION	73	419	1.14097e-21	2.72691e-19
GO_CC_MM_PERINUCLEAR_REGION_OF_CYTOPLASM	71	399	1.17694e-21	2.78231e-19
WIKIPATHWAYS_MM_METAPATHWAY_BIOTRANSFORMATION-WP702	41	139	1.80771e-21	4.22753e-19
MPO_MM_ENLARGED_LIVER	38	120	3.22502e-21	7.46181e-19
MPO_MM_ABNORMAL_ENZYME_COENZYME_ACTIVITY	40	136	6.24452e-21	1.42097e-18
KEGG_MM_PEROXISOME	31	78	6.27215e-21	1.42097e-18
TFACTS_MM_TP53	39	129	6.37214e-21	1.42874e-18
GO_BP_MM_PROTEOLYSIS	82	528	7.11954e-21	1.58003e-18
MPO_MM_REDUCED_FEMALE_FERTILITY	52	234	1.20744e-20	2.65259e-18
MPO_MM_INCREASED_LIVER_TRIGLYCERIDE_LEVEL	27	58	1.29976e-20	2.82686e-18
MICROCOSM_TARGETS_MM_HSA-MIR-766	72	427	1.48936e-20	3.20713e-18
MICROCOSM_TARGETS_MM_HSA-MIR-214	63	343	4.15919e-20	8.86846e-18
GO_BP_MM_POSITIVE_REGULATION_OF_TRANSCRIPTION_DNA-DEPENDENT	78	499	4.26634e-20	9.00861e-18
MPO_MM_ANEMIA	53	250	4.97335e-20	1.04005e-17
TFACTS_MM_AR	25	51	6.89489e-20	1.42816e-17
GO_MF_MM_RECEPTOR_BINDING	55	271	8.40647e-20	1.72483e-17
TFACTS_MM_FOXO1	41	153	9.30887e-20	1.89214e-17
MPO_MM_IMPROVED_GLUCOSE_TOLERANCE	35	110	9.79553e-20	1.97262e-17
NETPATH_MM_ANDROGEN_RECEPTOR_SIGNALING_PATHWAY	43	169	1.04878e-19	2.09265e-17
TFACTS_MM_SREBF1	24	47	1.08677e-19	2.14874e-17
MPO_MM_DECREASED_CIRCULATING_FREE_FATTY_ACID_LEVEL	25	52	1.26733e-19	2.4706e-17
MPO_MM_FEMALE_INFERTILITY	53	255	1.27228e-19	2.4706e-17
MPO_MM_ABNORMAL_RENAL_GLOMERULUS_MORPHOLOGY	35	111	1.36494e-19	2.62709e-17
GO_MF_MM_RECEPTOR_ACTIVITY	77	498	1.42691e-19	2.72227e-17
MPO_MM_HYPOGLYCEMIA	33	98	1.4903e-19	2.80695e-17
GO_CC_MM_PROTEIN_COMPLEX	57	293	1.49711e-19	2.80695e-17
MPO_MM_PARTIAL_PERINATAL_LETHALITY	56	286	2.267e-19	4.21409e-17
GO_MF_MM_CALCIUM_ION_BINDING	86	604	2.40287e-19	4.42882e-17
MICROCOSM_TARGETS_MM_HSA-MIR-186	66	386	2.74851e-19	5.02331e-17
MICROCOSM_TARGETS_MM_HSA-MIR-191	63	358	3.98288e-19	7.15898e-17
MICROCOSM_TARGETS_MM_HSA-MIR-335	63	358	3.98288e-19	7.15898e-17
GO_BP_MM_INTRACELLULAR_SIGNAL_TRANSDUCTION	53	262	4.54057e-19	8.0945e-17
KEGG_MM_METABOLISM_OF_XENOBIOTICS_BY_CYTOCHROME_P450	32	95	5.20733e-19	9.20767e-17
MPO_MM_DECREASED_CIRCULATING_INSULIN_LEVEL	42	168	5.66141e-19	9.92984e-17
MPO_MM_PALE_LIVER	28	71	6.17806e-19	1.07493e-16
WIKIPATHWAYS_MM_INSULIN_SIGNALING-WP481	40	153	6.83176e-19	1.17924e-16
MPO_MM_ABNORMAL_CIRCULATING_AMINO_ACID_LEVEL	24	50	7.12311e-19	1.21985e-16
MPO_MM_INCREASED_CIRCULATING_ALANINE_TRANSAMINASE_LEVEL	27	66	8.34585e-19	1.41808e-16
MPO_MM_INCREASED_CIRCULATING_FREE_FATTY_ACID_LEVEL	25	56	1.22738e-18	2.06933e-16
GO_BP_MM_TRANSMEMBRANE_TRANSPORT	70	440	1.3254e-18	2.21739e-16
GO_MF_MM_PROTEIN_TYROSINE_KINASE_ACTIVITY	73	473	1.38746e-18	2.3035e-16
MPO_MM_HYPOACTIVITY	56	297	1.4033e-18	2.31215e-16
GO_BP_MM_NEGATIVE_REGULATION_OF_TRANSCRIPTION_DNA-DEPENDENT	67	409	1.51121e-18	2.47122e-16
MICROCOSM_TARGETS_MM_HSA-MIR-132	66	399	1.62349e-18	2.63503e-16
MPO_MM_ABNORMAL_CELL_PHYSIOLOGY	50	242	1.76213e-18	2.83885e-16
GO_CC_MM_GOLGI_APPARATUS	85	612	1.85884e-18	2.97265e-16
GO_MF_MM_PROTEIN_SERINE_THREONINE_KINASE_ACTIVITY	62	360	2.29116e-18	3.63726e-16
GO_BP_MM_POSITIVE_REGULATION_OF_APOPTOTIC_PROCESS	46	208	2.40081e-18	3.78372e-16
MPO_MM_IMPAIRED_GLUCOSE_TOLERANCE	42	176	3.62109e-18	5.66583e-16
REACTOME_MM_AR_PATHWAY	40	160	3.85064e-18	5.98197e-16
MICROCOSM_TARGETS_MM_HSA-MIR-25	62	364	4.01648e-18	6.19534e-16
MICROCOSM_TARGETS_MM_HSA-MIR-18A	65	396	4.40755e-18	6.7507e-16
GO_MF_MM_HEME_BINDING	41	169	4.77207e-18	7.25788e-16
PID_MM_FOXA2_AND_FOXA3_TRANSCRIPTION_FACTOR_NETWORKS	22	44	6.5921e-18	9.95636e-16
GO_BP_MM_NEGATIVE_REGULATION_OF_CELL_PROLIFERATION	52	270	9.05246e-18	1.35781e-15
MICROCOSM_TARGETS_MM_HSA-MIR-16-2	64	391	9.16784e-18	1.36569e-15
GO_CC_MM_NUCLEOPLASM	58	332	1.42406e-17	2.10693e-15
MICROCOSM_TARGETS_MM_HSA-MIR-377	57	323	1.6749e-17	2.46131e-15
MPO_MM_ABNORMAL_BRAIN_MORPHOLOGY	43	192	1.83672e-17	2.68099e-15
EHMN_MM_UREA_CYCLE_AND_METABOLISM_OF_ARGININE_PROLINE_GLUTAMATE_ASPARTATE_AND_ASPARAGINE	31	99	2.01244e-17	2.91791e-15
GO_MF_MM_ACTIN_BINDING	52	275	2.05649e-17	2.96202e-15
GO_BP_MM_POSITIVE_REGULATION_OF_CELL_PROLIFERATION	57	325	2.24259e-17	3.20882e-15
MPO_MM_DECREASED_LITTER_SIZE	51	266	2.26842e-17	3.22457e-15
EHMN_MM_TRYPTOPHAN_METABOLISM	25	62	2.45297e-17	3.46427e-15
GO_BP_MM_TRANSPORT	70	465	2.7065e-17	3.79766e-15
GO_CC_MM_NUCLEOLUS	76	535	3.32954e-17	4.64193e-15
GO_CC_MM_MITOCHONDRIAL_OUTER_MEMBRANE	30	94	3.62286e-17	5.0187e-15
MPO_MM_INCREASED_SENSITIVITY_TO_INDUCED_MORBIDITY_MORTALITY	42	187	3.86905e-17	5.32582e-15
MPO_MM_MALE_INFERTILITY	66	424	3.92382e-17	5.36724e-15
MICROCOSM_TARGETS_MM_HSA-MIR-130B	60	360	3.99551e-17	5.43115e-15
MPO_MM_HEMORRHAGE	49	253	6.20761e-17	8.38568e-15
INOH_MM_TRYPTOPHAN_DEGRADATION	23	53	6.39036e-17	8.57925e-15
MPO_MM_PARTIAL_EMBRYONIC_LETHALITY_DURING_ORGANOGENESIS	50	263	6.68605e-17	8.84497e-15
MPO_MM_DECREASED_HEMATOCRIT	36	140	6.71029e-17	8.84497e-15
WIKIPATHWAYS_MM_INTEGRATED_BREAST_CANCER_PATHWAY-WP1984	36	140	6.71029e-17	8.84497e-15
WIKIPATHWAYS_MM_CYTOCHROME_P450-WP43	22	48	7.12434e-17	9.33418e-15
TZ_SCS_TCELLS	47	236	8.46777e-17	1.10279e-14
GO_CC_MM_EXTRACELLULAR_REGION	119	1093	1.01523e-16	1.3143e-14
GO_MF_MM_IRON_ION_BINDING	43	201	1.10296e-16	1.41942e-14
GO_BP_MM_ANGIOGENESIS	40	175	1.1267e-16	1.44145e-14
GO_MF_MM_PROTEIN_KINASE_BINDING	49	257	1.20463e-16	1.53213e-14
MPO_MM_ABNORMAL_KIDNEY_MORPHOLOGY	38	159	1.33056e-16	1.68051e-14
MPO_MM_RESPIRATORY_DISTRESS	43	202	1.33674e-16	1.68051e-14
MPO_MM_DECREASED_BONE_MINERAL_DENSITY	36	143	1.40104e-16	1.75122e-14
GO_BP_MM_CELL_ADHESION	55	318	1.52577e-16	1.89623e-14
GO_BP_MM_CARBOHYDRATE_METABOLIC_PROCESS	39	168	1.54038e-16	1.90261e-14
MPO_MM_COMPLETE_EMBRYONIC_LETHALITY	51	278	1.5484e-16	1.90261e-14
MPO_MM_ABNORMAL_BRAIN_DEVELOPMENT	32	114	2.19242e-16	2.67882e-14
MPO_MM_RETICULOCYTOSIS	25	67	2.2055e-16	2.67974e-14
MICROCOSM_TARGETS_MM_HSA-MIR-593	63	406	2.3606e-16	2.85226e-14
MPO_MM_ABNORMAL_LIPID_LEVEL	27	80	2.72094e-16	3.26949e-14
MPO_MM_ABNORMAL_BLOOD_COAGULATION	26	74	3.11836e-16	3.72644e-14
KEGG_MM_CHEMICAL_CARCINOGENESIS	29	94	3.37248e-16	4.00809e-14
GO_CC_MM_INTRACELLULAR_MEMBRANE-BOUNDED_ORGANELLE	48	254	3.5395e-16	4.18372e-14
MPO_MM_INCREASED_APOPTOSIS	49	264	3.71197e-16	4.36387e-14
WIKIPATHWAYS_MM_TRYPTOPHAN_METABOLISM-WP465	20	41	3.91515e-16	4.57798e-14
KEGG_MM_FATTY_ACID_METABOLISM	21	46	3.98562e-16	4.63547e-14
MPO_MM_CYANOSIS	42	199	4.1479e-16	4.79855e-14
GO_BP_MM_INDUCTION_OF_APOPTOSIS	37	156	4.33472e-16	4.98814e-14
MIRTARBASE_MM_HSA-MIR-1	39	173	4.44215e-16	5.08486e-14
MICROCOSM_TARGETS_MM_HSA-MIR-425	63	415	6.89879e-16	7.8556e-14
MPO_MM_OXIDATIVE_STRESS	23	58	7.14775e-16	8.0914e-14
MPO_MM_DECREASED_ERYTHROCYTE_CELL_NUMBER	33	126	7.18029e-16	8.0914e-14
GO_MF_MM_SEQUENCE-SPECIFIC_DNA_BINDING	82	639	7.85443e-16	8.80546e-14
MICROCOSM_TARGETS_MM_HSA-MIR-545	62	406	8.79594e-16	9.77915e-14
TFACTS_MM_SREBF2	18	33	8.81288e-16	9.77915e-14
GO_CC_MM_ENDOSOME	34	135	9.53635e-16	1.05282e-13
INOH_MM_JAK_STAT_PATHWAY_AND_REGULATION	51	291	1.08859e-15	1.19574e-13
MPO_MM_INCREASED_LIVER_WEIGHT	27	84	1.1025e-15	1.20493e-13
MPO_MM_ABNORMAL_HEART_MORPHOLOGY	40	187	1.27208e-15	1.38332e-13
GO_CC_MM_CELL_SURFACE	55	334	1.37259e-15	1.4852e-13
MPO_MM_INCREASED_CIRCULATING_GLUCOSE_LEVEL	33	129	1.52573e-15	1.64273e-13
MPO_MM_WEIGHT_LOSS	45	235	1.75861e-15	1.88414e-13
KEGG_MM_PPAR_SIGNALING_PATHWAY	26	79	1.93923e-15	2.06747e-13
KEGG_MM_INSULIN_SIGNALING_PATHWAY	34	138	1.94929e-15	2.06805e-13
MICROCOSM_TARGETS_MM_HSA-MIR-374A	59	380	2.02374e-15	2.13662e-13
MPO_MM_ABNORMAL_GAIT	49	276	2.32e-15	2.43757e-13
GO_CC_MM_APICAL_PLASMA_MEMBRANE	42	209	2.5818e-15	2.68717e-13
EHMN_MM_ANDROGEN_AND_ESTROGEN_BIOSYNTHESIS_AND_METABOLISM	24	67	2.58228e-15	2.68717e-13
REACTOME_MM_EGFR_PATHWAY	39	182	2.69513e-15	2.79125e-13
GO_MF_MM_UBIQUITIN-PROTEIN_LIGASE_ACTIVITY	43	219	2.89659e-15	2.98568e-13
MPO_MM_REDUCED_MALE_FERTILITY	41	201	3.211e-15	3.29415e-13
NETPATH_MM_TNFALPHA_SIGNALING_PATHWAY	53	321	3.99234e-15	4.07649e-13
KEGG_MM_DRUG_METABOLISM_CYTOCHROME_P450	28	95	4.04426e-15	4.11022e-13
GO_MF_MM_MAGNESIUM_ION_BINDING	37	167	4.48351e-15	4.53544e-13
EHMN_MM_ARACHIDONIC_ACID_METABOLISM	25	75	4.77272e-15	4.80565e-13
MPO_MM_EXENCEPHALY	41	204	5.48594e-15	5.49833e-13
MPO_MM_PARTIAL_LETHALITY_THROUGHOUT_FETAL_GROWTH_AND_DEVELOPMENT	41	205	6.54208e-15	6.52677e-13
REACTOME_MM_AKT2_PATHWAY	29	104	6.65012e-15	6.60427e-13
MPO_MM_DECREASED_WHITE_ADIPOSE_TISSUE_AMOUNT	25	76	6.78836e-15	6.71091e-13
MICROCOSM_TARGETS_MM_HSA-MIR-500	59	391	7.46539e-15	7.34682e-13
REACTOME_MM_CREBBP_PATHWAY	31	120	8.09739e-15	7.93289e-13
MPO_MM_ABNORMAL_CIRCULATING_PROTEIN_LEVEL	21	52	8.34402e-15	8.13785e-13
TZ_SCS_BCELLS	49	285	8.51472e-15	8.26726e-13
MPO_MM_DECREASED_CIRCULATING_HDL_CHOLESTEROL_LEVEL	22	58	9.19117e-15	8.88439e-13
GO_CC_MM_FOCAL_ADHESION	30	113	9.81739e-15	9.44771e-13
PANTHER_MM_GONADOTROPIN_RELEASING_HORMONE_RECEPTOR_PATHWAY	43	227	1.09832e-14	1.05231e-12
EHMN_MM_XENOBIOTICS_METABOLISM	21	53	1.31938e-14	1.25856e-12
GO_BP_MM_REGULATION_OF_CELL_PROLIFERATION	32	130	1.32725e-14	1.26054e-12
GO_BP_MM_KIDNEY_DEVELOPMENT	28	100	1.72259e-14	1.62889e-12
MICROCOSM_TARGETS_MM_HSA-MIR-424	55	354	1.73315e-14	1.63178e-12
GO_MF_MM_ELECTRON_CARRIER_ACTIVITY	37	174	1.77864e-14	1.6674e-12
GO_BP_MM_FATTY_ACID_BETA-OXIDATION	17	33	1.99121e-14	1.85866e-12
KEGG_MM_TRYPTOPHAN_METABOLISM	19	43	2.13402e-14	1.97501e-12
MPO_MM_ABNORMAL_CHOLESTEROL_HOMEOSTASIS	19	43	2.13402e-14	1.97501e-12
MICROCOSM_TARGETS_MM_HSA-MIR-625	55	356	2.20713e-14	2.03402e-12
GO_CC_MM_MICROTUBULE	43	232	2.44292e-14	2.24101e-12
MICROCOSM_TARGETS_MM_HSA-MIR-183	57	379	2.45235e-14	2.24101e-12
GO_BP_MM_REGULATION_OF_TRANSCRIPTION_FROM_RNA_POLYMERASE_II_PROMOTER	41	213	2.56424e-14	2.33345e-12
GO_BP_MM_CELL_CYCLE	42	223	2.73818e-14	2.48136e-12
MPO_MM_DECREASED_TOTAL_BODY_FAT_AMOUNT	34	150	2.78207e-14	2.51067e-12
GO_BP_MM_LUNG_DEVELOPMENT	28	102	2.99192e-14	2.68889e-12
TF_MM_FRIARD_MEIS1	48	284	3.11383e-14	2.78694e-12
GO_BP_MM_FATTY_ACID_METABOLIC_PROCESS	22	61	3.149e-14	2.80687e-12
GO_MF_MM_OXIDOREDUCTASE_ACTIVITY_ACTING_ON_PAIRED_DONORS_WITH_INCORPORATION_OR_REDUCTION_OF_MOLECULAR_OXYGEN	30	118	3.46948e-14	3.07991e-12
GO_BP_MM_IN_UTERO_EMBRYONIC_DEVELOPMENT	41	215	3.56725e-14	3.15383e-12
MPO_MM_INCREASED_CIRCULATING_ALKALINE_PHOSPHATASE_LEVEL	19	44	3.58642e-14	3.15794e-12
NETPATH_MM_B_CELL_RECEPTOR_SIGNALING_PATHWAY	36	170	4.56483e-14	4.00324e-12
GO_BP_MM_CELLULAR_RESPONSE_TO_INSULIN_STIMULUS	22	62	4.65958e-14	4.06993e-12
MPO_MM_RESPIRATORY_FAILURE	34	153	5.16563e-14	4.49389e-12
GO_BP_MM_REGULATION_OF_APOPTOTIC_PROCESS	35	162	5.42508e-14	4.7008e-12
REACTOME_MM_MAPK3_PATHWAY	29	112	5.514e-14	4.75888e-12
GO_BP_MM_GLUTATHIONE_METABOLIC_PROCESS	16	30	5.71953e-14	4.91676e-12
WIKIPATHWAYS_MM_COMPLEMENT_AND_COAGULATION_CASCADES-WP558	19	45	5.92724e-14	5.07526e-12
GO_CC_MM_CYTOSKELETON	49	300	6.53786e-14	5.55824e-12
MPO_MM_ABNORMAL_SPERMATOGENESIS	37	181	6.54241e-14	5.55824e-12
MPO_MM_IMPAIRED_LUNG_ALVEOLUS_DEVELOPMENT	18	40	6.97817e-14	5.90538e-12
REACTOME_MM_AKT3_PATHWAY	27	98	7.77078e-14	6.55065e-12
GO_BP_MM_PROTEIN_TRANSPORT	63	459	8.13324e-14	6.82972e-12
REACTOME_MM_ACTB_PATHWAY	44	250	8.30014e-14	6.94307e-12
KEGG_MM_HIPPO_SIGNALING_PATHWAY	34	156	9.43277e-14	7.86028e-12
TZ_ADIPOSE_BROWN	19	46	9.64275e-14	8.00459e-12
MPO_MM_HYPERGLYCEMIA	27	99	1.01975e-13	8.43288e-12
REACTOME_MM_PIK3CA_PATHWAY	28	107	1.11721e-13	9.20388e-12
GO_BP_MM_AGING	30	123	1.14146e-13	9.36818e-12
TFACTS_MM_USF1	26	92	1.15451e-13	9.43966e-12
MPO_MM_INCREASED_BODY_WEIGHT	35	166	1.17074e-13	9.53653e-12
REACTOME_MM_PIK3R1_PATHWAY	25	85	1.24301e-13	1.00874e-11
MICROCOSM_TARGETS_MM_MMU-MIR-694	58	405	1.25625e-13	1.0157e-11
MPO_MM_DECREASED_PHYSIOLOGICAL_SENSITIVITY_TO_XENOBIOTIC	33	149	1.33616e-13	1.0763e-11
GO_MF_MM_PHOSPHATASE_ACTIVITY	29	116	1.47112e-13	1.18064e-11
REACTOME_MM_APOA1_PATHWAY	15	27	1.57461e-13	1.25905e-11
NETPATH_MM_LEPTIN_SIGNALING_PATHWAY	27	101	1.73665e-13	1.38353e-11
GO_BP_MM_HEART_DEVELOPMENT	36	178	1.99153e-13	1.5808e-11
REACTOME_MM_EP300_PATHWAY	30	126	2.25981e-13	1.78074e-11
MPO_MM_INCREASED_INSULIN_SENSITIVITY	30	126	2.25981e-13	1.78074e-11
MPO_MM_DECREASED_CIRCULATING_LEPTIN_LEVEL	24	80	2.35113e-13	1.84602e-11
GO_BP_MM_CHOLESTEROL_HOMEOSTASIS	19	48	2.44287e-13	1.91115e-11
REACTOME_MM_ERBB3_PATHWAY	35	170	2.46274e-13	1.91979e-11
MICROCOSM_TARGETS_MM_HSA-MIR-185	58	412	2.63322e-13	2.04536e-11
MPO_MM_MICROPHTHALMIA	30	127	2.82346e-13	2.18532e-11
TFACTS_MM_SP3	29	119	2.98009e-13	2.29651e-11
MPO_MM_COMPLETE_PERINATAL_LETHALITY	44	259	2.98824e-13	2.29651e-11
WIKIPATHWAYS_MM_EGF_EGFR_SIGNALING_PATHWAY-WP437	31	136	3.19559e-13	2.44363e-11
TF_MM_FRIARD_LEF1	47	291	3.20215e-13	2.44363e-11
WIKIPATHWAYS_MM_STATIN_PATHWAY-WP430	15	28	3.24016e-13	2.464e-11
GO_CC_MM_GOLGI_MEMBRANE	48	302	3.32133e-13	2.51692e-11
GO_BP_MM_RESPONSE_TO_ORGANIC_SUBSTANCE	26	96	3.47112e-13	2.6213e-11
MPO_MM_DECREASED_TESTIS_WEIGHT	35	172	3.5393e-13	2.66354e-11
MICROCOSM_TARGETS_MM_MMU-MIR-207	54	369	3.59011e-13	2.69246e-11
MPO_MM_DECREASED_HEMOGLOBIN_CONTENT	27	104	3.75844e-13	2.80902e-11
GO_BP_MM_RESPONSE_TO_STRESS	31	137	3.94123e-13	2.93554e-11
MPO_MM_INCREASED_INCIDENCE_OF_CHEMICALLY-INDUCED_TUMORS	25	89	3.96467e-13	2.94292e-11
MPO_MM_DECREASED_CIRCULATING_VLDL_CHOLESTEROL_LEVEL	14	24	4.08804e-13	3.02418e-11
NETPATH_MM_T_CELL_RECEPTOR_SIGNALING_PATHWAY	43	251	4.11787e-13	3.03591e-11
GO_CC_MM_LYSOSOME	35	173	4.23353e-13	3.11064e-11
MPO_MM_ABNORMAL_VITELLINE_VASCULATURE_MORPHOLOGY	30	129	4.37604e-13	3.20047e-11
GO_BP_MM_RESPONSE_TO_TOXIN	23	75	4.38522e-13	3.20047e-11
MPO_MM_DECREASED_SURVIVOR_RATE	36	183	4.77324e-13	3.47201e-11
MPO_MM_ABNORMAL_LUNG_DEVELOPMENT	27	105	4.82876e-13	3.50069e-11
GO_MF_MM_PEPTIDASE_ACTIVITY	30	130	5.42883e-13	3.92264e-11
MICROCOSM_TARGETS_MM_HSA-MIR-122	56	396	5.58308e-13	4.02075e-11
GO_BP_MM_BLOOD_COAGULATION	20	56	5.7099e-13	4.0985e-11
TFACTS_MM_FOXO3	22	69	5.77678e-13	4.13287e-11
MPO_MM_DECREASED_T_CELL_NUMBER	35	175	6.03095e-13	4.30056e-11
TFACTS_MM_GLI1	28	114	6.16909e-13	4.38075e-11
PANTHER_MM_EGF_RECEPTOR_SIGNALING_PATHWAY	27	106	6.18369e-13	4.38075e-11
GO_CC_MM_INTEGRAL_TO_PLASMA_MEMBRANE	49	318	6.23266e-13	4.40111e-11
MPO_MM_IMPAIRED_WOUND_HEALING	17	39	6.60978e-13	4.6523e-11
KEGG_MM_HTLV-I_INFECTION	45	276	7.20264e-13	5.05323e-11
GO_BP_MM_RESPONSE_TO_ESTRADIOL_STIMULUS	26	99	7.61115e-13	5.32266e-11
MPO_MM_ABNORMAL_LUNG_MORPHOLOGY	28	115	7.78244e-13	5.42501e-11
MICROCOSM_TARGETS_MM_HSA-MIR-340	44	267	8.8439e-13	6.14524e-11
MPO_MM_IMPAIRED_COORDINATION	49	321	8.90841e-13	6.1663e-11
GO_MF_MM_MONOOXYGENASE_ACTIVITY	19	51	8.93091e-13	6.1663e-11
MPO_MM_INCREASED_TRIGLYCERIDE_LEVEL	15	30	1.22528e-12	8.43311e-11
GO_CC_MM_TIGHT_JUNCTION	26	101	1.26181e-12	8.65711e-11
MPO_MM_EDEMA	34	170	1.28236e-12	8.77046e-11
MPO_MM_DECREASED_BODY_LENGTH	32	152	1.35276e-12	9.2164e-11
REACTOME_MM_CEBPA_PATHWAY	24	86	1.36028e-12	9.2164e-11
MPO_MM_DECREASED_SUSCEPTIBILITY_TO_DIET-INDUCED_OBESITY	24	86	1.36028e-12	9.2164e-11
MPO_MM_THROMBOSIS	22	72	1.52949e-12	1.03306e-10
TF_MM_ZHAO_TRP53	25	94	1.53423e-12	1.03306e-10
GO_BP_MM_CELL_DIFFERENTIATION	53	371	1.54479e-12	1.03696e-10
MPO_MM_HYPERACTIVITY	41	240	1.57206e-12	1.05202e-10
GO_BP_MM_BRAIN_DEVELOPMENT	35	181	1.68618e-12	1.12493e-10
EHMN_MM_BILE_ACID_BIOSYNTHESIS	17	41	1.79152e-12	1.19155e-10
EHMN_MM_OMEGA-6_FATTY_ACID_METABOLISM	14	26	1.83814e-12	1.21883e-10
MICROCOSM_TARGETS_MM_HSA-MIR-551B	53	374	2.1237e-12	1.4039e-10
MICROCOSM_TARGETS_MM_HSA-MIR-96	52	363	2.24409e-12	1.47899e-10
MPO_MM_ABNORMAL_CIRCULATING_CHOLESTEROL_LEVEL	15	31	2.26813e-12	1.49032e-10
WIKIPATHWAYS_MM_FATTY_ACID_BIOSYNTHESIS-WP357	13	22	2.27835e-12	1.49253e-10
PANTHER_MM_PDGF_SIGNALING_PATHWAY	28	120	2.38795e-12	1.55963e-10
GO_BP_MM_RESPONSE_TO_GLUCOCORTICOID_STIMULUS	25	96	2.56505e-12	1.65952e-10
KEGG_MM_FOCAL_ADHESION	37	203	2.5651e-12	1.65952e-10
MPO_MM_ABNORMAL_MACROPHAGE_PHYSIOLOGY	37	203	2.5651e-12	1.65952e-10
MPO_MM_COMPLETE_LETHALITY_THROUGHOUT_FETAL_GROWTH_AND_DEVELOPMENT	42	254	2.57143e-12	1.65952e-10
KEGG_MM_ENDOCYTOSIS	38	214	3.00207e-12	1.93172e-10
MPO_MM_DECREASED_LIVER_TRIGLYCERIDE_LEVEL	18	48	3.11307e-12	1.99723e-10
GO_MF_MM_PROTEIN_DOMAIN_SPECIFIC_BINDING	35	185	3.25884e-12	2.0846e-10
MPO_MM_TREMORS	39	225	3.41314e-12	2.1769e-10
MPO_MM_HEPATOCELLULAR_CARCINOMA	20	61	3.59769e-12	2.2746e-10
MPO_MM_INCREASED_OXYGEN_CONSUMPTION	20	61	3.59769e-12	2.2746e-10
PID_MM_VALIDATED_TARGETS_OF_C-MYC_TRANSCRIPTIONAL_REPRESSION	20	61	3.59769e-12	2.2746e-10
GO_BP_MM_TRIGLYCERIDE_METABOLIC_PROCESS	14	27	3.6481e-12	2.29978e-10
MPO_MM_ABNORMAL_PULMONARY_ALVEOLUS_MORPHOLOGY	27	114	4.0099e-12	2.52056e-10
TF_MM_FRIARD_AML1	37	206	4.04824e-12	2.53733e-10
MICROCOSM_TARGETS_MM_HSA-MIR-129	55	404	4.16648e-12	2.60393e-10
KEGG_MM_GLUTATHIONE_METABOLISM	19	55	4.2999e-12	2.67961e-10
MICROCOSM_TARGETS_MM_HSA-MIR-577	51	358	4.49169e-12	2.79113e-10
MPO_MM_SMALL_SPLEEN	23	83	4.6625e-12	2.88903e-10
TFACTS_MM_GLI2	24	91	5.19156e-12	3.20771e-10
KEGG_MM_TRANSCRIPTIONAL_MISREGULATION_IN_CANCER	33	169	5.43885e-12	3.35098e-10
MPO_MM_VENTRICULAR_SEPTAL_DEFECT	29	133	5.96196e-12	3.6629e-10
KEGG_MM_GLYCINE_SERINE_AND_THREONINE_METABOLISM	16	38	6.06484e-12	3.70517e-10
MPO_MM_ABNORMAL_AMINO_ACID_LEVEL	16	38	6.06484e-12	3.70517e-10
MICROCOSM_TARGETS_MM_HSA-MIR-149	52	373	6.41113e-12	3.90576e-10
REACTOME_MM_ACTC1_PATHWAY	33	170	6.44005e-12	3.91242e-10
MPO_MM_CATARACTS	24	92	6.70488e-12	4.06196e-10
KEGG_MM_VALINE_LEUCINE_AND_ISOLEUCINE_DEGRADATION	18	50	7.01277e-12	4.23669e-10
BIOCARTA_MM_MECHANISM_OF_GENE_REGULATION_BY_PEROXISOME_PROLIFERATORS_VIA_PPARA-ALPHA	17	44	7.06854e-12	4.25855e-10
PID_MM_HIF-1-ALPHA_TRANSCRIPTION_FACTOR_NETWORK	20	63	7.09438e-12	4.26231e-10
MIRTARBASE_MM_HSA-MIR-155	30	143	7.36874e-12	4.41495e-10
PID_MM_DIRECT_P53_EFFECTORS	27	117	7.71969e-12	4.61252e-10
INOH_MM_EPO_SIGNALING	34	181	8.12679e-12	4.84245e-10
MPO_MM_ABNORMAL_EMBRYONIC_TISSUE_MORPHOLOGY	32	162	8.2156e-12	4.88199e-10
GO_BP_MM_RESPONSE_TO_HYPOXIA	35	191	8.43561e-12	4.99908e-10
REACTOME_MM_BCAR1_PATHWAY	25	101	8.71429e-12	5.15019e-10
INOH_MM_GLYCINE_SERINE_METABOLISM	16	39	9.82405e-12	5.77468e-10
TFACTS_MM_HNF1A	16	39	9.82405e-12	5.77468e-10
REACTOME_MM_ITGB1_PATHWAY	23	86	1.0454e-11	6.12839e-10
MPO_MM_ATHEROSCLEROTIC_LESIONS	17	45	1.08508e-11	6.32692e-10
MPO_MM_DECREASED_GLYCOGEN_LEVEL	17	45	1.08508e-11	6.32692e-10
TFACTS_MM_CEBPA	25	102	1.10188e-11	6.4077e-10
GO_CC_MM_EXTRACELLULAR_MATRIX	35	193	1.14732e-11	6.65416e-10
GO_BP_MM_ORGAN_REGENERATION	19	58	1.26428e-11	7.29126e-10
MPO_MM_ABNORMAL_CORNEA_MORPHOLOGY	19	58	1.26428e-11	7.29126e-10
GO_BP_MM_COMPLEMENT_ACTIVATION_CLASSICAL_PATHWAY	12	20	1.26723e-11	7.29126e-10
KEGG_MM_BILE_SECRETION	21	72	1.33005e-11	7.63251e-10
GO_MF_MM_GTP_BINDING	50	358	1.51106e-11	8.64842e-10
GO_BP_MM_RESPONSE_TO_ORGANIC_CYCLIC_COMPOUND	30	147	1.53936e-11	8.7873e-10
EHMN_MM_C21-STEROID_HORMONE_BIOSYNTHESIS_AND_METABOLISM	16	40	1.56414e-11	8.88214e-10
MPO_MM_ABNORMAL_HOMEOSTASIS	16	40	1.56414e-11	8.88214e-10
MPO_MM_DECREASED_BIRTH_WEIGHT	22	80	1.59639e-11	9.01816e-10
MPO_MM_KIDNEY_CYSTS	22	80	1.59639e-11	9.01816e-10
GO_MF_MM_TRANSCRIPTION_COREPRESSOR_ACTIVITY	25	104	1.74532e-11	9.80851e-10
GO_BP_MM_CELL_MIGRATION	25	104	1.74532e-11	9.80851e-10
REACTOME_MM_HDAC1_PATHWAY	24	96	1.79777e-11	1.00513e-09
MPO_MM_ABNORMAL_MYOCARDIUM_LAYER_MORPHOLOGY	24	96	1.79777e-11	1.00513e-09
GO_BP_MM_POSITIVE_REGULATION_OF_CATALYTIC_ACTIVITY	15	35	2.04254e-11	1.13324e-09
EHMN_MM_PROSTAGLANDIN_FORMATION_FROM_ARACHIDONATE	15	35	2.04254e-11	1.13324e-09
MPO_MM_DECREASED_CIRCULATING_LDL_CHOLESTEROL_LEVEL	15	35	2.04254e-11	1.13324e-09
KEGG_MM_BIOSYNTHESIS_OF_UNSATURATED_FATTY_ACIDS	13	25	2.07975e-11	1.14803e-09
INOH_MM_ALANINE_ASPARTATE_ASPARAGINE_METABOLISM	13	25	2.07975e-11	1.14803e-09
GO_BP_MM_DEPHOSPHORYLATION	25	105	2.18661e-11	1.20397e-09
BIOCARTA_MM_NUCLEAR_RECEPTORS_IN_LIPID_METABOLISM_AND_TOXICITY	14	30	2.30799e-11	1.26439e-09
WIKIPATHWAYS_MM_NUCLEAR_RECEPTORS_IN_LIPID_METABOLISM_AND_TOXICITY-WP299	14	30	2.30799e-11	1.26439e-09
MPO_MM_INCREASED_EATING_BEHAVIOR	21	74	2.37665e-11	1.29667e-09
REACTOME_MM_ACTG1_PATHWAY	36	208	2.37883e-11	1.29667e-09
EHMN_MM_VALINE_LEUCINE_AND_ISOLEUCINE_DEGRADATION	16	41	2.45054e-11	1.33242e-09
REACTOME_MM_JUN_PATHWAY	31	159	2.45987e-11	1.33416e-09
REACTOME_MM_FOS_PATHWAY	26	114	2.48542e-11	1.34132e-09
MPO_MM_ABNORMAL_VISCERAL_YOLK_SAC_MORPHOLOGY	26	114	2.48542e-11	1.34132e-09
GO_MF_MM_TRANSCRIPTION_FACTOR_BINDING	40	251	2.74478e-11	1.47763e-09
REACTOME_MM_APOB_PATHWAY	12	21	2.82684e-11	1.51431e-09
EHMN_MM_DI-UNSATURATED_FATTY_ACID_BETA-OXIDATION	12	21	2.82684e-11	1.51431e-09
TFACTS_MM_E2F1	30	151	3.12805e-11	1.67155e-09
INOH_MM_IL-7_SIGNALING	33	180	3.23892e-11	1.7238e-09
MPO_MM_POSTNATAL_LETHALITY	38	231	3.24169e-11	1.7238e-09
GO_MF_MM_FLAVIN_ADENINE_DINUCLEOTIDE_BINDING	22	83	3.5467e-11	1.87682e-09
NETPATH_MM_IL2_SIGNALING_PATHWAY	22	83	3.5467e-11	1.87682e-09
KEGG_MM_PYRUVATE_METABOLISM	16	42	3.78166e-11	1.99629e-09
TF_MM_FRIARD_NF-Y	34	191	3.80841e-11	2.00555e-09
MICROCOSM_TARGETS_MM_HSA-MIR-629	44	298	3.89709e-11	2.04729e-09
MPO_MM_ABNORMAL_XENOBIOTIC_PHARMACOKINETICS	13	26	3.97569e-11	2.08355e-09
MPO_MM_INCREASED_NEUTROPHIL_CELL_NUMBER	28	134	4.01649e-11	2.09987e-09
GO_BP_MM_PROTEIN_UBIQUITINATION	41	265	4.05006e-11	2.11235e-09
TFACTS_MM_USF2	21	76	4.15828e-11	2.1636e-09
NETPATH_MM_TGFBETA_RECEPTOR_SIGNALING_PATHWAY	36	212	4.17559e-11	2.16742e-09
GO_CC_MM_CELL_CORTEX	24	100	4.56287e-11	2.34881e-09
MPO_MM_CARDIAC_FIBROSIS	24	100	4.56287e-11	2.34881e-09
MPO_MM_DECREASED_LEUKOCYTE_CELL_NUMBER	24	100	4.56287e-11	2.34881e-09
TF_MM_FRIARD_ER	41	266	4.56824e-11	2.34881e-09
MPO_MM_INCREASED_CIRCULATING_LDL_CHOLESTEROL_LEVEL	15	37	5.37593e-11	2.75757e-09
EHMN_MM_METHIONINE_AND_CYSTEINE_METABOLISM	16	43	5.75354e-11	2.93741e-09
MPO_MM_INCREASED_CIRCULATING_ASPARTATE_TRANSAMINASE_LEVEL	16	43	5.75354e-11	2.93741e-09
WIKIPATHWAYS_MM_APOPTOSIS_MODULATION_AND_SIGNALING-WP1772	20	70	6.16304e-11	3.13911e-09
MIRTARBASE_MM_HSA-MIR-16	31	165	6.61767e-11	3.3628e-09
WIKIPATHWAYS_MM_TAMOXIFEN_METABOLISM-WP691	9	11	6.66228e-11	3.37757e-09
WIKIPATHWAYS_MM_FOCAL_ADHESION-WP306	33	185	6.92725e-11	3.50374e-09
MPO_MM_INCREASED_BLOOD_UREA_NITROGEN_LEVEL	24	102	7.1324e-11	3.59913e-09
MPO_MM_COMPLETE_EMBRYONIC_LETHALITY_BEFORE_SOMITE_FORMATION	39	248	7.26994e-11	3.66005e-09
MOUSECYC_MM_PWY-4061_GLUTATHIONE-MEDIATED_DETOXIFICATION	13	27	7.32864e-11	3.68108e-09
GO_BP_MM_REGULATION_OF_RHO_PROTEIN_SIGNAL_TRANSDUCTION	20	71	8.19297e-11	4.10574e-09
GO_CC_MM_NEURONAL_CELL_BODY	40	260	8.29904e-11	4.14933e-09
EHMN_MM_GLYCINE_SERINE_ALANINE_AND_THREONINE_METABOLISM	16	44	8.63735e-11	4.30857e-09
GO_MF_MM_PYRIDOXAL_PHOSPHATE_BINDING	18	57	8.73761e-11	4.33868e-09
MPO_MM_HEPATIC_NECROSIS	18	57	8.73761e-11	4.33868e-09
GO_BP_MM_ANTI-APOPTOSIS	27	130	1.02928e-10	5.08769e-09
MPO_MM_DECREASED_LYMPHOCYTE_CELL_NUMBER	27	130	1.02928e-10	5.08769e-09
MPO_MM_ABNORMAL_CEREBRAL_CORTEX_MORPHOLOGY	31	168	1.06497e-10	5.25215e-09
GO_BP_MM_RESPONSE_TO_GLUCOSE_STIMULUS	20	72	1.08326e-10	5.33025e-09
EHMN_MM_GLYCEROPHOSPHOLIPID_METABOLISM	24	104	1.10168e-10	5.40579e-09
REACTOME_MM_ITGB2_PATHWAY	17	51	1.10358e-10	5.40579e-09
GO_BP_MM_RESPONSE_TO_PEPTIDE_HORMONE_STIMULUS	23	96	1.19347e-10	5.83297e-09
GO_MF_MM_SERINE-TYPE_ENDOPEPTIDASE_ACTIVITY	33	189	1.24609e-10	6.07648e-09
WIKIPATHWAYS_MM_FLUOROPYRIMIDINE_ACTIVITY-WP1601	13	28	1.30759e-10	6.36213e-09
MICROCOSM_TARGETS_MM_HSA-MIR-223	50	380	1.31442e-10	6.38109e-09
PANTHER_MM_BLOOD_COAGULATION	15	39	1.31764e-10	6.38251e-09
KEGG_MM_ADHERENS_JUNCTION	20	73	1.42476e-10	6.87074e-09
EHMN_MM_GLYCOLYSIS_AND_GLUCONEOGENESIS	20	73	1.42476e-10	6.87074e-09
GO_BP_MM_PROTEIN_DEPHOSPHORYLATION	26	123	1.50528e-10	7.243e-09
GO_BP_MM_BIOSYNTHETIC_PROCESS	21	81	1.54818e-10	7.43297e-09
REACTOME_MM_CALM1_PATHWAY	22	89	1.56425e-10	7.48628e-09
WIKIPATHWAYS_MM_ERBB_SIGNALING_PATHWAY-WP673	17	52	1.56617e-10	7.48628e-09
MPO_MM_INCREASED_LIVER_CHOLESTEROL_LEVEL	11	19	1.59607e-10	7.61248e-09
MPO_MM_DECREASED_SUBCUTANEOUS_ADIPOSE_TISSUE_AMOUNT	18	59	1.66312e-10	7.91495e-09
MPO_MM_SPLEEN_HYPOPLASIA	25	115	1.78973e-10	8.49885e-09
GO_MF_MM_CALMODULIN_BINDING	26	124	1.81805e-10	8.61453e-09
GO_MF_MM_KINASE_ACTIVITY	29	152	1.83566e-10	8.67908e-09
GO_BP_MM_SPERMATOGENESIS	39	256	1.91148e-10	9.01797e-09
KEGG_MM_GLYCEROPHOSPHOLIPID_METABOLISM	22	90	1.97668e-10	9.28527e-09
WIKIPATHWAYS_MM_B_CELL_RECEPTOR_SIGNALING_PATHWAY-WP23	22	90	1.97668e-10	9.28527e-09
KEGG_MM_P53_SIGNALING_PATHWAY	19	67	2.12943e-10	9.98125e-09
MPO_MM_SMALL_LUNG	17	53	2.20249e-10	1.03015e-08
MPO_MM_ABNORMAL_URINE_HOMEOSTASIS	21	83	2.54011e-10	1.18551e-08
MICROCOSM_TARGETS_MM_HSA-MIR-541	49	375	2.55104e-10	1.18806e-08
INOH_MM_VEGF	32	184	2.62276e-10	1.21885e-08
MPO_MM_ABNORMAL_EXTRAEMBRYONIC_TISSUE_MORPHOLOGY	25	117	2.64383e-10	1.22603e-08
MICROCOSM_TARGETS_MM_HSA-MIR-23B	53	426	2.97333e-10	1.37589e-08
GO_BP_MM_RESPONSE_TO_DNA_DAMAGE_STIMULUS	27	136	3.02046e-10	1.39473e-08
KEGG_MM_PORPHYRIN_AND_CHLOROPHYLL_METABOLISM	15	41	3.03515e-10	1.39855e-08
REACTOME_MM_NCOR2_PATHWAY	17	54	3.07052e-10	1.4078e-08
MPO_MM_DECREASED_PERCENT_BODY_FAT	17	54	3.07052e-10	1.4078e-08
REACTOME_MM_PIK3R2_PATHWAY	18	61	3.07465e-10	1.4078e-08
MIRTARBASE_MM_HSA-MIR-30A	22	92	3.12333e-10	1.42709e-08
MPO_MM_ABNORMAL_CHONDROCYTE_MORPHOLOGY	20	76	3.14634e-10	1.43459e-08
WIKIPATHWAYS_MM_BLOOD_CLOTTING_CASCADE-WP272	11	20	3.39194e-10	1.54333e-08
GO_CC_MM_TRANSCRIPTION_FACTOR_COMPLEX	39	261	3.41852e-10	1.55013e-08
MPO_MM_EMBRYONIC_GROWTH_ARREST	36	228	3.42112e-10	1.55013e-08
MICROCOSM_TARGETS_MM_HSA-MIR-559	48	367	3.74356e-10	1.6927e-08
KEGG_MM_PROPANOATE_METABOLISM	13	30	3.82117e-10	1.71708e-08
INOH_MM_VALINE_LEUCINE_ISOLEUCINE_DEGRADATION	13	30	3.82117e-10	1.71708e-08
MOUSECYC_MM_FAO-PWY_FATTY_ACID_BETA_OXIDATION_I	13	30	3.82117e-10	1.71708e-08
PID_MM_REGULATION_OF_ANDROGEN_RECEPTOR_ACTIVITY	16	48	3.89313e-10	1.73864e-08
TFACTS_MM_STAT5A	16	48	3.89313e-10	1.73864e-08
TFACTS_MM_STAT5B	16	48	3.89313e-10	1.73864e-08
KEGG_MM_SMALL_CELL_LUNG_CANCER	21	85	4.1011e-10	1.82776e-08
GO_CC_MM_CELL_PROJECTION	18	62	4.13802e-10	1.83669e-08
WIKIPATHWAYS_MM_AMPK_SIGNALING-WP1403	18	62	4.13802e-10	1.83669e-08
SMPDB_MM_GLYCINE_SERINE_AND_THREONINE_METABOLISM	12	25	4.17849e-10	1.85088e-08
REACTOME_MM_CAMK2B_PATHWAY	17	55	4.24521e-10	1.87661e-08
PID_MM_A6B1_AND_A6B4_INTEGRIN_SIGNALING	15	42	4.51125e-10	1.99017e-08
KEGG_MM_CYSTEINE_AND_METHIONINE_METABOLISM	14	36	4.58915e-10	2.02044e-08
REACTOME_MM_GRB2_PATHWAY	30	168	4.84418e-10	2.12841e-08
MICROCOSM_TARGETS_MM_HSA-MIR-144	44	322	4.94518e-10	2.1684e-08
MIRTARBASE_MM_HSA-LET-7B	27	139	5.04762e-10	2.20887e-08
KEGG_MM_ERBB_SIGNALING_PATHWAY	21	86	5.18113e-10	2.26274e-08
WIKIPATHWAYS_MM_DNA_DAMAGE_RESPONSE_ONLY_ATM_DEPENDENT-WP710	20	78	5.21237e-10	2.27182e-08
MPO_MM_SMALL_TESTIS	34	210	5.30635e-10	2.30815e-08
GO_MF_MM_HISTONE_DEACETYLASE_BINDING	18	63	5.53327e-10	2.40206e-08
MPO_MM_PALLOR	30	169	5.62106e-10	2.43531e-08
GO_BP_MM_CELLULAR_AROMATIC_COMPOUND_METABOLIC_PROCESS	7	7	5.78423e-10	2.50102e-08
KEGG_MM_STEROID_HORMONE_BIOSYNTHESIS	17	56	5.82284e-10	2.50774e-08
MOUSECYC_MM_PWY66-201_NICOTINE_DEGRADATION_II	17	56	5.82284e-10	2.50774e-08
MICROCOSM_TARGETS_MM_HSA-MIR-367	48	372	5.92659e-10	2.54738e-08
GO_MF_MM_PROTEIN_TYROSINE_PHOSPHATASE_ACTIVITY	22	95	6.04997e-10	2.59017e-08
GO_MF_MM_TRANSFERASE_ACTIVITY	22	95	6.04997e-10	2.59017e-08
GO_MF_MM_PROTEIN_COMPLEX_BINDING	21	87	6.52139e-10	2.78652e-08
GO_BP_MM_CHOLESTEROL_EFFLUX	11	21	6.81212e-10	2.89935e-08
MPO_MM_INCREASED_SUSCEPTIBILITY_TO_ATHEROSCLEROSIS	11	21	6.81212e-10	2.89935e-08
KEGG_MM_HEPATITIS_B	27	141	7.04714e-10	2.99115e-08
MPO_MM_ABNORMAL_TYPE_II_PNEUMOCYTE_MORPHOLOGY	14	37	7.05532e-10	2.99115e-08
GO_BP_MM_POSITIVE_REGULATION_OF_MITOTIC_CELL_CYCLE	12	26	7.41928e-10	3.13934e-08
GO_MF_MM_SIGNAL_TRANSDUCER_ACTIVITY	33	202	7.45971e-10	3.15031e-08
KEGG_MM_CHRONIC_MYELOID_LEUKEMIA	19	72	8.24837e-10	3.47662e-08
REACTOME_MM_ESR1_PATHWAY	20	80	8.48606e-10	3.563e-08
TF_MM_ZHAO_CREB1	20	80	8.48606e-10	3.563e-08
MPO_MM_DECREASED_DOUBLE-POSITIVE_T_CELL_NUMBER	29	162	8.81732e-10	3.69495e-08
REACTOME_MM_FURIN_PATHWAY	10	17	9.01227e-10	3.76215e-08
BIOCARTA_MM_OXIDATIVE_STRESS_INDUCED_GENE_EXPRESSION_VIA_NRF2	10	17	9.01227e-10	3.76215e-08
MPO_MM_ABNORMAL_NERVOUS_SYSTEM_PHYSIOLOGY	25	124	9.6571e-10	4.02361e-08
MPO_MM_ABNORMAL_CARTILAGE_MORPHOLOGY	18	65	9.71292e-10	4.03142e-08
PID_MM_BETA1_INTEGRIN_CELL_SURFACE_INTERACTIONS	18	65	9.71292e-10	4.03142e-08
PANTHER_MM_ANGIOGENESIS	28	153	1.01529e-09	4.20601e-08
MPO_MM_OLIGOZOOSPERMIA	29	163	1.02369e-09	4.23273e-08
MICROCOSM_TARGETS_MM_HSA-MIR-20B	50	403	1.02737e-09	4.23992e-08
GO_BP_MM_GLUCOSE_HOMEOSTASIS	19	73	1.06493e-09	4.38657e-08
TF_MM_FRIARD_AREB6	26	134	1.07524e-09	4.42067e-08
REACTOME_MM_CSNK1D_PATHWAY	22	98	1.13933e-09	4.65734e-08
GO_BP_MM_HIGH-DENSITY_LIPOPROTEIN_PARTICLE_REMODELING	8	10	1.14137e-09	4.65734e-08
GO_BP_MM_OXALOACETATE_METABOLIC_PROCESS	8	10	1.14137e-09	4.65734e-08
GO_BP_MM_DRUG_METABOLIC_PROCESS	8	10	1.14137e-09	4.65734e-08
REACTOME_MM_ETS1_PATHWAY	21	90	1.27309e-09	5.18509e-08
TFACTS_MM_CTNNB1	39	273	1.29031e-09	5.24541e-08
EHMN_MM_SATURATED_FATTY_ACIDS_BETA-OXIDATION	11	22	1.30297e-09	5.28698e-08
REACTOME_MM_NCOR1_PATHWAY	15	45	1.37553e-09	5.57104e-08
INOH_MM_PURINE_NUCLEOTIDES_NUCLEOSIDES_METABOLISM	22	99	1.39865e-09	5.64745e-08
MICROCOSM_TARGETS_MM_HSA-MIR-744	46	357	1.39959e-09	5.64745e-08
GO_BP_MM_CELL_DIVISION	37	251	1.40561e-09	5.66122e-08
KEGG_MM_DRUG_METABOLISM_OTHER_ENZYMES	17	59	1.43732e-09	5.77822e-08
MPO_MM_LIVER_FIBROSIS	14	39	1.59165e-09	6.38567e-08
KEGG_MM_ALANINE_ASPARTATE_AND_GLUTAMATE_METABOLISM	13	33	1.59723e-09	6.38567e-08
WIKIPATHWAYS_MM_FATTY_ACID_BETA_OXIDATION-WP143	13	33	1.59723e-09	6.38567e-08
MPO_MM_ABNORMAL_SPLEEN_MORPHOLOGY	28	156	1.60505e-09	6.40519e-08
MPO_MM_ABNORMAL_TRABECULAR_BONE_MORPHOLOGY	25	127	1.6312e-09	6.49761e-08
MPO_MM_DECREASED_CELL_PROLIFERATION	38	264	1.68339e-09	6.69324e-08
GO_CC_MM_MITOCHONDRIAL_MEMBRANE	19	75	1.75031e-09	6.93397e-08
MPO_MM_ATELECTASIS	19	75	1.75031e-09	6.93397e-08
BIOCARTA_MM_CONTROL_CALCIUM_CALMODULIN-DEPENDENT_KINASE_CAMK	10	18	1.93992e-09	7.67115e-08
GO_CC_MM_PEROXISOMAL_MEMBRANE	15	46	1.95036e-09	7.69843e-08
MPO_MM_ABNORMAL_HEART_VENTRICLE_MORPHOLOGY	21	92	1.95539e-09	7.70431e-08
GO_CC_MM_DENDRITE	34	221	2.08759e-09	8.2103e-08
MPO_MM_OPEN_NEURAL_TUBE	29	168	2.11788e-09	8.30885e-08
MOUSECYC_MM_TRYPTOPHAN-DEGRADATION-1_TRYPTOPHAN_DEGRADATION_III_EUKARYOTIC	9	14	2.12579e-09	8.30885e-08
GO_MF_MM_GLUTATHIONE_TRANSFERASE_ACTIVITY	12	28	2.1364e-09	8.30885e-08
GO_BP_MM_CELLULAR_AMINO_ACID_METABOLIC_PROCESS	12	28	2.1364e-09	8.30885e-08
MPO_MM_LIVER_DEGENERATION	12	28	2.1364e-09	8.30885e-08
GO_BP_MM_RESPONSE_TO_NUTRIENT	20	84	2.14321e-09	8.30885e-08
PANTHER_MM_TGF-BETA_SIGNALING_PATHWAY	20	84	2.14321e-09	8.30885e-08
NETPATH_MM_IL6_SIGNALING_PATHWAY	20	84	2.14321e-09	8.30885e-08
MPO_MM_ABNORMAL_APOPTOSIS	19	76	2.22887e-09	8.62557e-08
REACTOME_MM_BCR_PATHWAY	14	40	2.34023e-09	9.02439e-08
MPO_MM_INCREASED_CIRCULATING_HDL_CHOLESTEROL_LEVEL	14	40	2.34023e-09	9.02439e-08
GO_BP_MM_DNA_REPAIR	34	222	2.35246e-09	9.05551e-08
MPO_MM_ABNORMAL_CIRCULATING_ENZYME_LEVEL	11	23	2.3884e-09	9.16144e-08
WIKIPATHWAYS_MM_OXIDATIVE_STRESS-WP408	11	23	2.3884e-09	9.16144e-08
REACTOME_MM_EGF_PATHWAY	21	93	2.41178e-09	9.23484e-08
REACTOME_MM_CCND1_PATHWAY	23	111	2.55191e-09	9.73711e-08
MPO_MM_ABNORMAL_MYOCARDIAL_FIBER_MORPHOLOGY	23	111	2.55191e-09	9.73711e-08
GO_BP_MM_CIRCADIAN_RHYTHM	15	47	2.73724e-09	1.03896e-07
GO_BP_MM_INSULIN_RECEPTOR_SIGNALING_PATHWAY	15	47	2.73724e-09	1.03896e-07
WIKIPATHWAYS_MM_GLYCOLYSIS_AND_GLUCONEOGENESIS-WP534	15	47	2.73724e-09	1.03896e-07
GO_BP_MM_STEROID_HORMONE_MEDIATED_SIGNALING_PATHWAY	16	54	2.76964e-09	1.04942e-07
MPO_MM_DECREASED_NEUTROPHIL_CELL_NUMBER	18	69	2.7967e-09	1.05783e-07
TFACTS_MM_CREB1	31	191	2.83018e-09	1.06864e-07
EHMN_MM_PURINE_METABOLISM	36	246	2.84208e-09	1.07127e-07
MPO_MM_ABNORMAL_BLOOD_VESSEL_MORPHOLOGY	30	181	3.0483e-09	1.14702e-07
REACTOME_MM_CASP3_PATHWAY	20	86	3.33052e-09	1.25104e-07
MPO_MM_DECREASED_BROWN_ADIPOSE_TISSUE_AMOUNT	14	41	3.3963e-09	1.27355e-07
MPO_MM_DECREASED_TRIGLYCERIDE_LEVEL	12	29	3.48455e-09	1.3044e-07
REACTOME_MM_CTNNB1_PATHWAY	36	248	3.54397e-09	1.32436e-07
PID_MM_GLUCOCORTICOID_RECEPTOR_REGULATORY_NETWORK	19	78	3.56829e-09	1.32888e-07
WIKIPATHWAYS_MM_APOPTOSIS-WP254	19	78	3.56829e-09	1.32888e-07
REACTOME_MM_PIK3CG_PATHWAY	18	70	3.59602e-09	1.33692e-07
MPO_MM_ABNORMAL_ENZYME_COENZYME_LEVEL	16	55	3.73174e-09	1.38501e-07
TFACTS_MM_TFAP2A	22	104	3.74111e-09	1.38612e-07
MPO_MM_ABNORMAL_CARDIOVASCULAR_SYSTEM_PHYSIOLOGY	25	132	3.76309e-09	1.39189e-07
GO_MF_MM_PHOSPHATIDYLINOSITOL-3_4_5-TRISPHOSPHATE_BINDING	10	19	3.91805e-09	1.43942e-07
REACTOME_MM_APOA2_PATHWAY	10	19	3.91805e-09	1.43942e-07
EHMN_MM_MONO-UNSATURATED_FATTY_ACID_BETA-OXIDATION	10	19	3.91805e-09	1.43942e-07
MPO_MM_DECREASED_LIVER_CHOLESTEROL_LEVEL	10	19	3.91805e-09	1.43942e-07
REACTOME_MM_APOA4_PATHWAY	8	11	4.00736e-09	1.46975e-07
MPO_MM_DECREASED_BRAINSTEM_AUDITORY_EVOKED_POTENTIAL	24	123	4.12699e-09	1.51108e-07
GO_BP_MM_NEGATIVE_REGULATION_OF_CELL_MIGRATION	17	63	4.36911e-09	1.59436e-07
GO_BP_MM_PALATE_DEVELOPMENT	17	63	4.36911e-09	1.59436e-07
TFACTS_MM_JUN	23	114	4.39623e-09	1.60157e-07
GO_CC_MM_SPHERICAL_HIGH-DENSITY_LIPOPROTEIN_PARTICLE	7	8	4.43373e-09	1.60984e-07
GO_BP_MM_TOXIN_METABOLIC_PROCESS	7	8	4.43373e-09	1.60984e-07
MPO_MM_SPARSE_HAIR	19	79	4.48719e-09	1.62653e-07
REACTOME_MM_PIK3CD_PATHWAY	18	71	4.60139e-09	1.66515e-07
GO_BP_MM_RESPONSE_TO_ORGANIC_NITROGEN	14	42	4.86888e-09	1.75903e-07
REACTOME_MM_INPPL1_PATHWAY	9	15	5.08639e-09	1.83152e-07
EHMN_MM_PHYTANIC_ACID_PEROXISOMAL_OXIDATION	9	15	5.08639e-09	1.83152e-07
GO_CC_MM_BASOLATERAL_PLASMA_MEMBRANE	25	134	5.19209e-09	1.86649e-07
NETPATH_MM_FOLLICLE_STIMULATING_HORMONE_SIGNALING_PATHWAY	15	49	5.23929e-09	1.88035e-07
MPO_MM_KYPHOSIS	27	154	5.28943e-09	1.89522e-07
SMPDB_MM_VALINE_LEUCINE_AND_ISOLEUCINE_DEGRADATION	12	30	5.55284e-09	1.98306e-07
MPO_MM_INCREASED_FATTY_ACID_LEVEL	12	30	5.55284e-09	1.98306e-07
PID_MM_FOXM1_TRANSCRIPTION_FACTOR_NETWORK	13	36	5.62458e-09	2.00539e-07
REACTOME_MM_F2_PATHWAY	17	64	5.68347e-09	2.02307e-07
GO_BP_MM_WOUND_HEALING	18	72	5.86025e-09	2.07919e-07
TF_MM_ZHAO_AR	18	72	5.86025e-09	2.07919e-07
MPO_MM_SLOW_POSTNATAL_WEIGHT_GAIN	25	135	6.0832e-09	2.15478e-07
GO_BP_MM_REGULATION_OF_CELL_CYCLE	20	89	6.28739e-09	2.22349e-07
MPO_MM_INCREASED_PHYSIOLOGICAL_SENSITIVITY_TO_XENOBIOTIC	21	98	6.58183e-09	2.32383e-07
REACTOME_MM_ITGAM_PATHWAY	16	57	6.63013e-09	2.33331e-07
MPO_MM_DECREASED_LIVER_WEIGHT	16	57	6.63013e-09	2.33331e-07
GO_CC_MM_CENTROSOME	40	301	6.65488e-09	2.33824e-07
REACTOME_MM_PIK3C2B_PATHWAY	14	43	6.8998e-09	2.41649e-07
INOH_MM_GLYCOLYSIS_GLUCONEOGENESIS	14	43	6.8998e-09	2.41649e-07
REACTOME_MM_ATF2_PATHWAY	19	81	7.01318e-09	2.45224e-07
TFACTS_MM_ESR1	15	50	7.15216e-09	2.49683e-07
KEGG_MM_GLYOXYLATE_AND_DICARBOXYLATE_METABOLISM	11	25	7.20215e-09	2.50623e-07
WIKIPATHWAYS_MM_ONE_CARBON_METABOLISM-WP241	11	25	7.20215e-09	2.50623e-07
REACTOME_MM_ITGA6_PATHWAY	17	65	7.35236e-09	2.55442e-07
NETPATH_MM_WNT_SIGNALING_PATHWAY	23	117	7.42557e-09	2.56081e-07
GO_BP_MM_MALE_GONAD_DEVELOPMENT	18	73	7.42962e-09	2.56081e-07
GO_MF_MM_RHO_GUANYL-NUCLEOTIDE_EXCHANGE_FACTOR_ACTIVITY	18	73	7.42962e-09	2.56081e-07
MPO_MM_ABNORMAL_DORSAL_AORTA_MORPHOLOGY	18	73	7.42962e-09	2.56081e-07
MPO_MM_ABNORMAL_SKIN_MORPHOLOGY	18	73	7.42962e-09	2.56081e-07
MPO_MM_ABNORMAL_BILE_COMPOSITION	10	20	7.4969e-09	2.57991e-07
WIKIPATHWAYS_MM_SENESCENCE_AND_AUTOPHAGY-WP615	20	90	7.72005e-09	2.6525e-07
KEGG_MM_ALZHEIMERS_DISEASE	28	167	7.76231e-09	2.66282e-07
MPO_MM_INCREASED_B_CELL_NUMBER	21	99	7.9773e-09	2.73226e-07
REACTOME_MM_COL1A1_PATHWAY	19	82	8.71838e-09	2.98138e-07
MPO_MM_ABNORMAL_PLATELET_PHYSIOLOGY	16	58	8.74786e-09	2.98209e-07
PID_MM_VALIDATED_NUCLEAR_ESTROGEN_RECEPTOR_ALPHA_NETWORK	16	58	8.74786e-09	2.98209e-07
MICROCOSM_TARGETS_MM_HSA-MIR-454	42	329	9.34676e-09	3.18126e-07
MPO_MM_ABNORMAL_SKELETON_MORPHOLOGY	24	128	9.41746e-09	3.19532e-07
TFACTS_MM_NFKB1	24	128	9.41746e-09	3.19532e-07
MPO_MM_INCREASED_CIRCULATING_LEPTIN_LEVEL	20	91	9.44955e-09	3.20122e-07
KEGG_MM_VIRAL_CARCINOGENESIS	33	223	9.61798e-09	3.25321e-07
WIKIPATHWAYS_MM_MYOMETRIAL_RELAXATION_AND_CONTRACTION_PATHWAYS-WP289	26	148	9.65293e-09	3.25644e-07
REACTOME_MM_PIK3C2G_PATHWAY	14	44	9.67185e-09	3.25644e-07
PID_MM_COREGULATION_OF_ANDROGEN_RECEPTOR_ACTIVITY	15	51	9.68216e-09	3.25644e-07
MPO_MM_EXTRAMEDULLARY_HEMATOPOIESIS	25	138	9.68741e-09	3.25644e-07
MPO_MM_THYMUS_HYPOPLASIA	28	169	1.01723e-08	3.41414e-07
KEGG_MM_PARKINSONS_DISEASE	23	119	1.04226e-08	3.49279e-07
GO_BP_MM_POST-EMBRYONIC_DEVELOPMENT	19	83	1.0799e-08	3.6078e-07
TFACTS_MM_EGR1	19	83	1.0799e-08	3.6078e-07
BIOCARTA_MM_INTRINSIC_PROTHROMBIN_ACTIVATION_PATHWAY	9	16	1.11273e-08	3.70609e-07
MOUSECYC_MM_PWY3DJ-0_ISOLEUCINE_DEGRADATION	9	16	1.11273e-08	3.70609e-07
MPO_MM_DECREASED_PLATELET_CELL_NUMBER	22	110	1.1206e-08	3.72659e-07
WIKIPATHWAYS_MM_ALANINE_AND_ASPARTATE_METABOLISM-WP106	8	12	1.1512e-08	3.81668e-07
MOUSECYC_MM_PWY-5789_3-HYDROXYPROPIONATE_4-HYDROXYB_CYCLE	8	12	1.1512e-08	3.81668e-07
TF_MM_FRIARD_SOX-5	34	236	1.15462e-08	3.82218e-07
KEGG_MM_HUNTINGTONS_DISEASE	28	170	1.16244e-08	3.84222e-07
REACTOME_MM_PIK3CB_PATHWAY	18	75	1.17866e-08	3.88993e-07
SMPDB_MM_PHOSPHOLIPID_BIOSYNTHESIS	11	26	1.19396e-08	3.90489e-07
GO_BP_MM_ONE-CARBON_METABOLIC_PROCESS	11	26	1.19396e-08	3.90489e-07
MPO_MM_ABNORMAL_FAT_PAD_MORPHOLOGY	11	26	1.19396e-08	3.90489e-07
MPO_MM_ABNORMAL_IRON_HOMEOSTASIS	11	26	1.19396e-08	3.90489e-07
MOUSECYC_MM_PWY-5136_FATTY_ACID_BETA_OXIDATION_II_CORE_PATHWAY	11	26	1.19396e-08	3.90489e-07
TF_MM_ZHAO_PPARA	11	26	1.19396e-08	3.90489e-07
GO_BP_MM_COMPLEMENT_ACTIVATION	6	6	1.20895e-08	3.93614e-07
GO_BP_MM_HIGH-DENSITY_LIPOPROTEIN_PARTICLE_CLEARANCE	6	6	1.20895e-08	3.93614e-07
MOUSECYC_MM_PWY-5030_HISTIDINE_DEGRADATION_III	6	6	1.20895e-08	3.93614e-07
PID_MM_P73_TRANSCRIPTION_FACTOR_NETWORK	17	67	1.21108e-08	3.93718e-07
GO_CC_MM_EARLY_ENDOSOME	23	120	1.23111e-08	3.99634e-07
GO_BP_MM_RESPONSE_TO_LIPOPOLYSACCHARIDE	27	160	1.23693e-08	4.00924e-07
MICROCOSM_TARGETS_MM_HSA-MIR-526B	43	345	1.28218e-08	4.14971e-07
GO_MF_MM_STEROID_HORMONE_RECEPTOR_ACTIVITY	15	52	1.3003e-08	4.20213e-07
GO_BP_MM_LIPOPROTEIN_METABOLIC_PROCESS	12	32	1.32525e-08	4.2764e-07
TF_MM_WINGENDER_SP3	20	93	1.40297e-08	4.52049e-07
REACTOME_MM_CAV1_PATHWAY	23	121	1.45134e-08	4.66941e-07
MPO_MM_HYDRONEPHROSIS	18	76	1.47528e-08	4.73941e-07
GO_BP_MM_PEPTIDYL-SERINE_PHOSPHORYLATION	16	60	1.49416e-08	4.78593e-07
MPO_MM_ABNORMAL_RETINAL_VASCULATURE_MORPHOLOGY	16	60	1.49416e-08	4.78593e-07
REACTOME_MM_CSNK1A1_PATHWAY	22	112	1.58579e-08	5.0645e-07
MPO_MM_DECREASED_CARDIAC_MUSCLE_CONTRACTILITY	22	112	1.58579e-08	5.0645e-07
GO_MF_MM_TRANSCRIPTION_REGULATORY_REGION_DNA_BINDING	27	162	1.62508e-08	5.1824e-07
MPO_MM_DECREASED_FETAL_SIZE	23	122	1.70769e-08	5.4299e-07
PID_MM_PDGFR-BETA_SIGNALING_PATHWAY	23	122	1.70769e-08	5.4299e-07
GO_BP_MM_POSITIVE_REGULATION_OF_NEURON_APOPTOTIC_PROCESS	13	39	1.72705e-08	5.45955e-07
GO_BP_MM_PEPTIDYL-TYROSINE_DEPHOSPHORYLATION	13	39	1.72705e-08	5.45955e-07
MPO_MM_ABNORMAL_GLUCONEOGENESIS	13	39	1.72705e-08	5.45955e-07
TF_MM_ZHAO_PPARG	13	39	1.72705e-08	5.45955e-07
KEGG_MM_NON-SMALL_CELL_LUNG_CANCER	15	53	1.73306e-08	5.47058e-07
MPO_MM_ABNORMAL_PLACENTA_MORPHOLOGY	18	77	1.83914e-08	5.79703e-07
TF_MM_FRIARD_C-REL	27	163	1.85927e-08	5.85198e-07
GO_MF_MM_ACTIN_FILAMENT_BINDING	17	69	1.95553e-08	6.13719e-07
GO_BP_MM_RESPONSE_TO_INSULIN_STIMULUS	17	69	1.95553e-08	6.13719e-07
NETPATH_MM_KIT_RECEPTOR_SIGNALING_PATHWAY	21	104	2.00648e-08	6.28126e-07
GO_CC_MM_NUCLEAR_ENVELOPE	19	86	2.0101e-08	6.28126e-07
NETPATH_MM_IL3_SIGNALING_PATHWAY	19	86	2.0101e-08	6.28126e-07
KEGG_MM_MAPK_SIGNALING_PATHWAY	35	253	2.0394e-08	6.3637e-07
REACTOME_MM_CSNK1E_PATHWAY	20	95	2.05893e-08	6.41543e-07
GO_BP_MM_NERVOUS_SYSTEM_DEVELOPMENT	27	164	2.12463e-08	6.61066e-07
INOH_MM_TGF-BETA_SUPER_FAMILY_SIGNALING_PATHWAY_CANONICAL	22	114	2.22482e-08	6.9125e-07
SMPDB_MM_BILE_ACID_BIOSYNTHESIS	9	17	2.26316e-08	6.99169e-07
GO_CC_MM_VERY-LOW-DENSITY_LIPOPROTEIN_PARTICLE	9	17	2.26316e-08	6.99169e-07
MPO_MM_ABNORMAL_BILE_SALT_LEVEL	9	17	2.26316e-08	6.99169e-07
MPO_MM_HYPERLIPIDEMIA	9	17	2.26316e-08	6.99169e-07
MPO_MM_CONGESTIVE_HEART_FAILURE	18	78	2.28384e-08	7.04555e-07
KEGG_MM_ARGININE_AND_PROLINE_METABOLISM	15	54	2.29309e-08	7.06409e-07
PID_MM_INSULIN_PATHWAY	13	40	2.44592e-08	7.52423e-07
MPO_MM_ABNORMAL_VITELLINE_VASCULAR_REMODELING	17	70	2.46743e-08	7.57967e-07
PID_MM_REGULATION_OF_TELOMERASE	16	62	2.49216e-08	7.64485e-07
MPO_MM_ABNORMAL_BRANCHING_OF_THE_MAMMARY_DUCTAL_TREE	14	47	2.5096e-08	7.67668e-07
PANTHER_MM_OXIDATIVE_STRESS_RESPONSE	14	47	2.5096e-08	7.67668e-07
MPO_MM_INFERTILITY	22	115	2.627e-08	8.02452e-07
KEGG_MM_PHOSPHATIDYLINOSITOL_SIGNALING_SYSTEM	18	79	2.82535e-08	8.60622e-07
TZ_KIDNEY	18	79	2.82535e-08	8.60622e-07
EHMN_MM_VITAMIN_B9_FOLATE_METABOLISM	8	13	2.86619e-08	8.70626e-07
MPO_MM_INCREASED_CIRCULATING_AMMONIA_LEVEL	8	13	2.86619e-08	8.70626e-07
MPO_MM_ABNORMAL_ADRENAL_GLAND_MORPHOLOGY	12	34	2.94259e-08	8.91342e-07
MPO_MM_INCREASED_GLYCOGEN_LEVEL	12	34	2.94259e-08	8.91342e-07
GO_BP_MM_CYTOSKELETON_ORGANIZATION	20	97	2.98831e-08	9.01341e-07
MPO_MM_SHORT_TAIL	20	97	2.98831e-08	9.01341e-07
KEGG_MM_PROSTATE_CANCER	19	88	2.99218e-08	9.01341e-07
MPO_MM_SPLEEN_HYPERPLASIA	19	88	2.99218e-08	9.01341e-07
MPO_MM_INCREASED_HEPATOCYTE_APOPTOSIS	15	55	3.01306e-08	9.05126e-07
WIKIPATHWAYS_MM_FOLATE_METABOLISM-WP176	15	55	3.01306e-08	9.05126e-07
REACTOME_MM_CDC42_PATHWAY	22	116	3.09559e-08	9.28634e-07
KEGG_MM_GLYCOLYSIS_GLUCONEOGENESIS	16	63	3.19182e-08	9.53556e-07
REACTOME_MM_E2F1_PATHWAY	16	63	3.19182e-08	9.53556e-07
REACTOME_MM_ITGB4_PATHWAY	16	63	3.19182e-08	9.53556e-07
PANTHER_MM_APOPTOSIS_SIGNALING_PATHWAY	21	107	3.38902e-08	1.01108e-06
REACTOME_MM_ITGAL_PATHWAY	13	41	3.42384e-08	1.01867e-06
MPO_MM_ANISOCYTOSIS	13	41	3.42384e-08	1.01867e-06
MPO_MM_ABNORMAL_HAIR_FOLLICLE_MORPHOLOGY	18	80	3.48243e-08	1.03469e-06
REACTOME_MM_DKFZP666O0110_PATHWAY	20	98	3.58578e-08	1.06394e-06
GO_BP_MM_REGULATION_OF_GENE_EXPRESSION	19	89	3.63368e-08	1.07669e-06
GO_CC_MM_AXON	28	179	3.6747e-08	1.08736e-06
REACTOME_MM_ACTA1_PATHWAY	24	137	3.72497e-08	1.10074e-06
MICROCOSM_TARGETS_MM_HSA-MIR-550	43	358	3.78995e-08	1.11842e-06
MPO_MM_INTRACRANIAL_HEMORRHAGE	17	72	3.8762e-08	1.14232e-06
GO_CC_MM_CELL_JUNCTION	38	296	3.98671e-08	1.1733e-06
EHMN_MM_SELENOAMINO_ACID_METABOLISM	10	23	4.06561e-08	1.19008e-06
MPO_MM_ABNORMAL_VIBRISSA_MORPHOLOGY	10	23	4.06561e-08	1.19008e-06
INOH_MM_METHIONINE_CYSTEINE_METABOLISM	10	23	4.06561e-08	1.19008e-06
INOH_MM_PROPANOATE_METABOLISM	10	23	4.06561e-08	1.19008e-06
KEGG_MM_JAK-STAT_SIGNALING_PATHWAY	25	148	4.13611e-08	1.20747e-06
MPO_MM_LUNG_INFLAMMATION	25	148	4.13611e-08	1.20747e-06
GO_BP_MM_PROTEIN_HOMOOLIGOMERIZATION	24	138	4.30522e-08	1.25515e-06
SMPDB_MM_STEROID_BIOSYNTHESIS	9	18	4.33233e-08	1.258e-06
GO_BP_MM_POSITIVE_REGULATION_OF_RELEASE_OF_CYTOCHROME_C_FROM_MITOCHONDRIA	9	18	4.33233e-08	1.258e-06
REACTOME_MM_PIP5K1C_PATHWAY	9	18	4.33233e-08	1.258e-06
GO_BP_MM_FATTY_ACID_BIOSYNTHETIC_PROCESS	14	49	4.53126e-08	1.314e-06
GO_BP_MM_PROTEIN_POLYMERIZATION	11	29	4.6779e-08	1.35112e-06
GO_CC_MM_CYTOPLASMIC_MICROTUBULE	11	29	4.6779e-08	1.35112e-06
MPO_MM_INCREASED_CIRCULATING_KETONE_BODY_LEVEL	11	29	4.6779e-08	1.35112e-06
MPO_MM_MAMMARY_ADENOCARCINOMA	13	42	4.74041e-08	1.36555e-06
INOH_MM_INOSITOL_PHOSPHATE_METABOLISM	13	42	4.74041e-08	1.36555e-06
REACTOME_MM_COL1A2_PATHWAY	17	73	4.82736e-08	1.38692e-06
REACTOME_MM_ITGAV_PATHWAY	17	73	4.82736e-08	1.38692e-06
REACTOME_MM_CREB1_PATHWAY	24	139	4.96837e-08	1.42368e-06
MPO_MM_AZOOSPERMIA	24	139	4.96837e-08	1.42368e-06
MPO_MM_ABNORMAL_B_CELL_DIFFERENTIATION	22	119	5.00571e-08	1.43249e-06
MPO_MM_DECREASED_CD8-POSITIVE_T_CELL_NUMBER	26	160	5.05413e-08	1.44445e-06
GO_BP_MM_POSITIVE_REGULATION_OF_MAPK_CASCADE	16	65	5.15401e-08	1.46721e-06
GO_BP_MM_MAPK_CASCADE	16	65	5.15401e-08	1.46721e-06
MPO_MM_DECREASED_PURKINJE_CELL_NUMBER	16	65	5.15401e-08	1.46721e-06
MPO_MM_DECREASED_T_CELL_PROLIFERATION	28	182	5.29192e-08	1.5045e-06
WIKIPATHWAYS_MM_NEURAL_CREST_DIFFERENTIATION-WP2064	19	91	5.31109e-08	1.50798e-06
GO_BP_MM_SMALL_GTPASE_MEDIATED_SIGNAL_TRANSDUCTION	25	150	5.43612e-08	1.54146e-06
KEGG_MM_HIF-1_SIGNALING_PATHWAY	21	110	5.60925e-08	1.58849e-06
GO_CC_MM_ACTIN_CYTOSKELETON	24	140	5.72516e-08	1.6192e-06
MPO_MM_REDUCED_FERTILITY	26	161	5.7543e-08	1.62533e-06
MPO_MM_ABNORMAL_CEREBELLUM_MORPHOLOGY	22	120	5.85307e-08	1.65108e-06
REACTOME_MM_FN1_PATHWAY	17	74	5.9874e-08	1.68461e-06
PID_MM_SIGNALING_EVENTS_MEDIATED_BY_HEPATOCYTE_GROWTH_FACTOR_RECEPTOR_C-MET	17	74	5.9874e-08	1.68461e-06
MPO_MM_ENLARGED_KIDNEY	14	50	6.01527e-08	1.68808e-06
WIKIPATHWAYS_MM_KIT_RECEPTOR_SIGNALING_PATHWAY-WP304	14	50	6.01527e-08	1.68808e-06
WIKIPATHWAYS_MM_ESTROGEN_METABOLISM-WP697	7	10	6.10615e-08	1.71137e-06
MPO_MM_DECREASED_EPIDIDYMAL_FAT_PAD_WEIGHT	12	36	6.14135e-08	1.71902e-06
GO_BP_MM_EXTRACELLULAR_MATRIX_ORGANIZATION	18	83	6.38532e-08	1.78495e-06
MPO_MM_LETHARGY	19	92	6.3933e-08	1.78495e-06
MPO_MM_ABNORMAL_BLOOD_FLOW_VELOCITY	8	14	6.40435e-08	1.78575e-06
REACTOME_MM_PIK3C3_PATHWAY	13	43	6.49559e-08	1.80887e-06
PANTHER_MM_INTEGRIN_SIGNALLING_PATHWAY	26	162	6.54371e-08	1.81994e-06
REACTOME_MM_HIF1A_PATHWAY	15	58	6.57467e-08	1.82346e-06
EHMN_MM_LINOLEATE_METABOLISM	15	58	6.57467e-08	1.82346e-06
MPO_MM_ENLARGED_HEART	24	141	6.58758e-08	1.82346e-06
GO_BP_MM_TRANSCRIPTION_FROM_RNA_POLYMERASE_II_PROMOTER	21	111	6.60669e-08	1.82346e-06
MPO_MM_ABNORMAL_ERYTHROPOIESIS	21	111	6.60669e-08	1.82346e-06
MPO_MM_INCREASED_HEART_WEIGHT	21	111	6.60669e-08	1.82346e-06
GO_BP_MM_METAL_ION_TRANSPORT	10	24	6.66841e-08	1.8312e-06
KEGG_MM_FATTY_ACID_ELONGATION	10	24	6.66841e-08	1.8312e-06
MPO_MM_ABNORMAL_CIRCULATING_LIPID_LEVEL	10	24	6.66841e-08	1.8312e-06
MPO_MM_PULMONARY_FIBROSIS	10	24	6.66841e-08	1.8312e-06
MPO_MM_ABNORMAL_RETINA_MORPHOLOGY	23	131	6.80876e-08	1.86739e-06
KEGG_MM_OXIDATIVE_PHOSPHORYLATION	22	121	6.83123e-08	1.87119e-06
KEGG_MM_BUTANOATE_METABOLISM	11	30	7.06468e-08	1.92785e-06
MPO_MM_DECREASED_FATTY_ACID_LEVEL	11	30	7.06468e-08	1.92785e-06
INOH_MM_CITRATE_CYCLE	11	30	7.06468e-08	1.92785e-06
GO_MF_MM_LIPID_BINDING	20	102	7.24864e-08	1.97557e-06
MPO_MM_ABNORMAL_INTESTINE_MORPHOLOGY	18	84	7.76325e-08	2.11054e-06
MPO_MM_DECREASED_INSULIN_SECRETION	18	84	7.76325e-08	2.11054e-06
MPO_MM_ABNORMAL_T_CELL_PHYSIOLOGY	23	132	7.87321e-08	2.13661e-06
SMPDB_MM_HYPOACETYLASPARTIA	9	19	7.87881e-08	2.13661e-06
KEGG_MM_LYSOSOME	22	122	7.95841e-08	2.15016e-06
MPO_MM_ABNORMAL_NEURON_MORPHOLOGY	22	122	7.95841e-08	2.15016e-06
TFACTS_MM_ETS1	22	122	7.95841e-08	2.15016e-06
GO_CC_MM_FIBRINOGEN_COMPLEX	6	7	8.11558e-08	2.18718e-06
GO_BP_MM_FOLIC_ACID-CONTAINING_COMPOUND_BIOSYNTHETIC_PROCESS	6	7	8.11558e-08	2.18718e-06
MPO_MM_PERSISTENT_TRUNCUS_ARTERIOSIS	16	67	8.15999e-08	2.19643e-06
MPO_MM_ABNORMAL_CRANIUM_MORPHOLOGY	20	103	8.59124e-08	2.3068e-06
MPO_MM_ABNORMAL_HUMORAL_IMMUNE_RESPONSE	20	103	8.59124e-08	2.3068e-06
MPO_MM_LUNG_HEMORRHAGE	12	37	8.69132e-08	2.32506e-06
PID_MM_FOXA1_TRANSCRIPTION_FACTOR_NETWORK	12	37	8.69132e-08	2.32506e-06
TFACTS_MM_PPARG	12	37	8.69132e-08	2.32506e-06
GO_BP_MM_CELLULAR_RESPONSE_TO_HYPOXIA	13	44	8.81396e-08	2.35208e-06
MPO_MM_CORNEAL_OPACITY	13	44	8.81396e-08	2.35208e-06
PANTHER_MM_P53_PATHWAY	17	76	9.10308e-08	2.42182e-06
INOH_MM_INSULIN	17	76	9.10308e-08	2.42182e-06
MPO_MM_ABNORMAL_CRANIOFACIAL_MORPHOLOGY	21	113	9.10869e-08	2.42182e-06
GO_CC_MM_CELL-CELL_JUNCTION	19	94	9.18766e-08	2.43686e-06
MPO_MM_ABNORMAL_CELL_MIGRATION	19	94	9.18766e-08	2.43686e-06
REACTOME_MM_ACTN1_PATHWAY	22	123	9.25508e-08	2.45175e-06
GO_MF_MM_PROTEIN_DIMERIZATION_ACTIVITY	20	104	1.0159e-07	2.68144e-06
REACTOME_MM_ERBB2_PATHWAY	16	68	1.01961e-07	2.68144e-06
REACTOME_MM_ITGB3_PATHWAY	16	68	1.01961e-07	2.68144e-06
EHMN_MM_PHOSPHATIDYLINOSITOL_PHOSPHATE_METABOLISM	16	68	1.01961e-07	2.68144e-06
MPO_MM_ABNORMAL_KIDNEY_DEVELOPMENT	16	68	1.01961e-07	2.68144e-06
PID_MM_AP-1_TRANSCRIPTION_FACTOR_NETWORK	16	68	1.01961e-07	2.68144e-06
GO_MF_MM_SYMPORTER_ACTIVITY	14	52	1.03656e-07	2.71617e-06
MPO_MM_ABNORMAL_VASCULAR_SMOOTH_MUSCLE_MORPHOLOGY	14	52	1.03656e-07	2.71617e-06
MPO_MM_FAILURE_OF_INITIATION_OF_EMBRYO_TURNING	14	52	1.03656e-07	2.71617e-06
REACTOME_MM_CDC2_PATHWAY	23	134	1.04779e-07	2.74227e-06
GO_BP_MM_CHOLESTEROL_BIOSYNTHETIC_PROCESS	10	25	1.06339e-07	2.77309e-06
GO_BP_MM_CELLULAR_RESPONSE_TO_STARVATION	10	25	1.06339e-07	2.77309e-06
REACTOME_MM_GJA1_PATHWAY	10	25	1.06339e-07	2.77309e-06
MPO_MM_GLOMERULONEPHRITIS	19	95	1.09698e-07	2.85494e-06
MPO_MM_DECREASED_B_CELL_NUMBER	30	211	1.0974e-07	2.85494e-06
GO_BP_MM_DNA_RECOMBINATION	17	77	1.11612e-07	2.89326e-06
MPO_MM_ABNORMAL_LENS_MORPHOLOGY	17	77	1.11612e-07	2.89326e-06
MPO_MM_DECREASED_ANGIOGENESIS	17	77	1.11612e-07	2.89326e-06
MPO_MM_DILATED_HEART_LEFT_VENTRICLE	18	86	1.13668e-07	2.93606e-06
MPO_MM_THICK_EPIDERMIS	18	86	1.13668e-07	2.93606e-06
PANTHER_MM_INTERLEUKIN_SIGNALING_PATHWAY	18	86	1.13668e-07	2.93606e-06
NETPATH_MM_THYMIC_STROMAL_LYMPHOPOIETIN_SIGNALING_PATHWAY	24	145	1.13849e-07	2.93724e-06
GO_MF_MM_COENZYME_BINDING	13	45	1.18495e-07	3.04627e-06
KEGG_MM_MINERAL_ABSORPTION	13	45	1.18495e-07	3.04627e-06
MPO_MM_ABNORMAL_PROXIMAL_CONVOLUTED_TUBULE_MORPHOLOGY	13	45	1.18495e-07	3.04627e-06
MPO_MM_ABNORMAL_MYELINATION	20	105	1.19858e-07	3.07406e-06
TF_MM_ZHAO_JUN	20	105	1.19858e-07	3.07406e-06
REACTOME_MM_CAMK2A_PATHWAY	12	38	1.21468e-07	3.10801e-06
REACTOME_MM_DUSP1_PATHWAY	12	38	1.21468e-07	3.10801e-06
PID_MM_E2F_TRANSCRIPTION_FACTOR_NETWORK	16	69	1.26838e-07	3.2416e-06
WIKIPATHWAYS_MM_CELL_CYCLE-WP179	19	96	1.30638e-07	3.33479e-06
SMPDB_MM_STARCH_AND_SUCROSE_METABOLISM	8	15	1.31423e-07	3.34306e-06
MPO_MM_ENLARGED_UTERUS	8	15	1.31423e-07	3.34306e-06
WIKIPATHWAYS_MM_CHOLESTEROL_BIOSYNTHESIS-WP197	8	15	1.31423e-07	3.34306e-06
MPO_MM_DECREASED_NK_CELL_NUMBER	14	53	1.34645e-07	3.41305e-06
MPO_MM_RENAL_HYPOPLASIA	14	53	1.34645e-07	3.41305e-06
PID_MM_FGF_SIGNALING_PATHWAY	14	53	1.34645e-07	3.41305e-06
MPO_MM_ABNORMAL_NEURAL_TUBE_CLOSURE	15	61	1.3605e-07	3.44064e-06
MPO_MM_ABNORMAL_TAIL_MORPHOLOGY	15	61	1.3605e-07	3.44064e-06
MPO_MM_ABNORMAL_ERYTHROCYTE_MORPHOLOGY	18	87	1.36912e-07	3.45558e-06
REACTOME_MM_CDIPT_PATHWAY	9	20	1.37117e-07	3.45558e-06
INOH_MM_LYSINE_DEGRADATION	9	20	1.37117e-07	3.45558e-06
GO_BP_MM_PROTEIN_AUTOPHOSPHORYLATION	23	136	1.38592e-07	3.48869e-06
INOH_MM_WNT_CANONICAL	22	126	1.44057e-07	3.62209e-06
MPO_MM_ABNORMAL_LUNG_SACCULE_MORPHOLOGY	11	32	1.52659e-07	3.83393e-06
MPO_MM_ABNORMAL_EMBRYOGENESIS_DEVELOPMENT	25	158	1.54101e-07	3.86567e-06
GO_BP_MM_POSITIVE_REGULATION_OF_ANGIOGENESIS	16	70	1.57109e-07	3.92755e-06
GO_BP_MM_RESPONSE_TO_ESTROGEN_STIMULUS	16	70	1.57109e-07	3.92755e-06
MPO_MM_INCREASED_BLEEDING_TIME	16	70	1.57109e-07	3.92755e-06
REACTOME_MM_BCL2_PATHWAY	13	46	1.57912e-07	3.93857e-06
INOH_MM_PYRIMIDINE_NUCLEOTIDES_NUCLEOSIDES_METABOLISM	13	46	1.57912e-07	3.93857e-06
MPO_MM_DECREASED_INTERFERON-GAMMA_SECRETION	23	137	1.59038e-07	3.9621e-06
GO_BP_MM_FIBRINOLYSIS	7	11	1.60906e-07	3.98582e-06
REACTOME_MM_APOA5_PATHWAY	7	11	1.60906e-07	3.98582e-06
REACTOME_MM_APOE_PATHWAY	7	11	1.60906e-07	3.98582e-06
MPO_MM_KETOACIDURIA	7	11	1.60906e-07	3.98582e-06
BIOCARTA_MM_EXTRINSIC_PROTHROMBIN_ACTIVATION_PATHWAY	7	11	1.60906e-07	3.98582e-06
MPO_MM_INCREASED_CIRCULATING_VLDL_CHOLESTEROL_LEVEL	10	26	1.65338e-07	4.09094e-06
MPO_MM_INCREASED_SPLEEN_WEIGHT	20	107	1.65745e-07	4.0917e-06
MPO_MM_SHORT_SNOUT	20	107	1.65745e-07	4.0917e-06
GO_BP_MM_MITOCHONDRION_ORGANIZATION	12	39	1.67778e-07	4.13251e-06
REACTOME_MM_CCNE1_PATHWAY	12	39	1.67778e-07	4.13251e-06
GO_BP_MM_GLUCOSE_METABOLIC_PROCESS	15	62	1.71517e-07	4.21981e-06
MPO_MM_CARCINOMA	14	54	1.73745e-07	4.26499e-06
MPO_MM_KINKED_NEURAL_TUBE	14	54	1.73745e-07	4.26499e-06
GO_BP_MM_WNT_RECEPTOR_SIGNALING_PATHWAY	23	138	1.82235e-07	4.46835e-06
GO_BP_MM_POSITIVE_REGULATION_OF_PROTEIN_PHOSPHORYLATION	19	98	1.83879e-07	4.49346e-06
GO_BP_MM_RESPONSE_TO_ETHANOL	19	98	1.83879e-07	4.49346e-06
MPO_MM_DECREASED_HEART_RATE	19	98	1.83879e-07	4.49346e-06
REACTOME_MM_COL4A1_PATHWAY	16	71	1.93797e-07	4.73052e-06
GO_MF_MM_DOUBLE-STRANDED_DNA_BINDING	21	118	1.96456e-07	4.78467e-06
KEGG_MM_AMOEBIASIS	21	118	1.96456e-07	4.78467e-06
GO_MF_MM_MICROTUBULE_BINDING	18	89	1.96897e-07	4.78471e-06
MPO_MM_INCREASED_CD4-POSITIVE_T_CELL_NUMBER	18	89	1.96897e-07	4.78471e-06
WIKIPATHWAYS_MM_ANDROGEN_RECEPTOR_SIGNALING_PATHWAY-WP138	17	80	2.01387e-07	4.88835e-06
MPO_MM_INCREASED_OSTEOCLAST_CELL_NUMBER	13	47	2.08695e-07	5.06009e-06
MPO_MM_NEURODEGENERATION	15	63	2.15141e-07	5.21058e-06
MPO_MM_ABNORMAL_BRAIN_WHITE_MATTER_MORPHOLOGY	11	33	2.19032e-07	5.28717e-06
PID_MM_ARF6_SIGNALING_EVENTS	11	33	2.19032e-07	5.28717e-06
PID_MM_SIGNALING_EVENTS_MEDIATED_BY_HDAC_CLASS_II	11	33	2.19032e-07	5.28717e-06
MPO_MM_ABSENT_KIDNEY	14	55	2.22784e-07	5.35396e-06
MPO_MM_DECREASED_BODY_TEMPERATURE	14	55	2.22784e-07	5.35396e-06
MPO_MM_INCREASED_SYSTEMIC_ARTERIAL_SYSTOLIC_BLOOD_PRESSURE	14	55	2.22784e-07	5.35396e-06
WIKIPATHWAYS_MM_SELENIUM_PATHWAY-WP15	14	55	2.22784e-07	5.35396e-06
GO_BP_MM_POSITIVE_REGULATION_OF_GENE_EXPRESSION	25	161	2.23285e-07	5.36006e-06
GO_CC_MM_MICROVILLUS	12	40	2.29201e-07	5.45948e-06
GO_BP_MM_ENDOCRINE_PANCREAS_DEVELOPMENT	12	40	2.29201e-07	5.45948e-06
MPO_MM_ABNORMAL_DERMAL_LAYER_MORPHOLOGY	12	40	2.29201e-07	5.45948e-06
MPO_MM_INCREASED_CIRCULATING_BILIRUBIN_LEVEL	12	40	2.29201e-07	5.45948e-06
PID_MM_BETA3_INTEGRIN_CELL_SURFACE_INTERACTIONS	12	40	2.29201e-07	5.45948e-06
PID_MM_UROKINASE-TYPE_PLASMINOGEN_ACTIVATOR_UPA_AND_UPAR-MEDIATED_SIGNALING	12	40	2.29201e-07	5.45948e-06
GO_BP_MM_GLUCONEOGENESIS	9	21	2.29685e-07	5.45948e-06
GO_BP_MM_NEGATIVE_REGULATION_OF_INSULIN_RECEPTOR_SIGNALING_PATHWAY	9	21	2.29685e-07	5.45948e-06
BIOCARTA_MM_APOPTOTIC_SIGNALING_IN_RESPONSE_TO_DNA_DAMAGE	9	21	2.29685e-07	5.45948e-06
GO_BP_MM_RESPONSE_TO_CYTOKINE_STIMULUS	17	81	2.43519e-07	5.76939e-06
MPO_MM_ABNORMAL_STERNUM_MORPHOLOGY	17	81	2.43519e-07	5.76939e-06
MPO_MM_INCREASED_CELL_PROLIFERATION	17	81	2.43519e-07	5.76939e-06
WIKIPATHWAYS_MM_MAPK_SIGNALING_PATHWAY-WP382	24	151	2.48468e-07	5.8691e-06
GO_BP_MM_STEROID_METABOLIC_PROCESS	8	16	2.51719e-07	5.8691e-06
KEGG_MM_PRIMARY_BILE_ACID_BIOSYNTHESIS	8	16	2.51719e-07	5.8691e-06
REACTOME_MM_PIP5K1A_PATHWAY	8	16	2.51719e-07	5.8691e-06
REACTOME_MM_PIP5K3_PATHWAY	8	16	2.51719e-07	5.8691e-06
EHMN_MM_OMEGA-3_FATTY_ACID_METABOLISM	8	16	2.51719e-07	5.8691e-06
EHMN_MM_SQUALENE_AND_CHOLESTEROL_BIOSYNTHESIS	8	16	2.51719e-07	5.8691e-06
MPO_MM_ABNORMAL_PANCREATIC_ACINUS_MORPHOLOGY	8	16	2.51719e-07	5.8691e-06
MPO_MM_DECREASED_HEPATOCYTE_NUMBER	8	16	2.51719e-07	5.8691e-06
WIKIPATHWAYS_MM_MITOCHONDRIAL_LC-FATTY_ACID_BETA-OXIDATION-WP368	8	16	2.51719e-07	5.8691e-06
MOUSECYC_MM_PWY3DJ-86_VALINE_DEGRADATION	8	16	2.51719e-07	5.8691e-06
TFACTS_MM_NR1H2	8	16	2.51719e-07	5.8691e-06
TFACTS_MM_NR1H3	8	16	2.51719e-07	5.8691e-06
GO_BP_MM_HISTIDINE_CATABOLIC_PROCESS	5	5	2.52585e-07	5.8691e-06
GO_BP_MM_POSITIVE_REGULATION_OF_CHOLESTEROL_BIOSYNTHETIC_PROCESS	5	5	2.52585e-07	5.8691e-06
GO_MF_MM_LIPASE_INHIBITOR_ACTIVITY	5	5	2.52585e-07	5.8691e-06
GO_BP_MM_S-ADENOSYLMETHIONINE_METABOLIC_PROCESS	5	5	2.52585e-07	5.8691e-06
GO_BP_MM_DNA_DAMAGE_RESPONSE_DETECTION_OF_DNA_DAMAGE	5	5	2.52585e-07	5.8691e-06
MPO_MM_ABNORMAL_NEURAL_TUBE_MORPHOLOGY_DEVELOPMENT	28	196	2.59273e-07	6.01806e-06
MPO_MM_INCREASED_LYMPHOMA_INCIDENCE	21	120	2.63738e-07	6.11518e-06
GO_BP_MM_ACTIN_CYTOSKELETON_ORGANIZATION	20	110	2.65301e-07	6.14486e-06
MPO_MM_ABNORMAL_HEART_LEFT_VENTRICLE_MORPHOLOGY	15	64	2.68553e-07	6.21357e-06
MPO_MM_ABNORMAL_HEART_DEVELOPMENT	27	185	2.71861e-07	6.28342e-06
PID_MM_SIGNALING_EVENTS_MEDIATED_BY_STEM_CELL_FACTOR_RECEPTOR_C-KIT	13	48	2.73632e-07	6.31095e-06
MOUSECYC_MM_PWY66-221_NICOTINE_DEGRADATION_III	13	48	2.73632e-07	6.31095e-06
WIKIPATHWAYS_MM_LEPTIN_SIGNALING_PATHWAY-WP2034	14	56	2.83936e-07	6.54166e-06
REACTOME_MM_CBL_PATHWAY	25	163	2.84292e-07	6.54293e-06
MPO_MM_DILATED_RENAL_TUBULES	16	73	2.91376e-07	6.69179e-06
MPO_MM_INCREASED_TOTAL_BODY_FAT_AMOUNT	16	73	2.91376e-07	6.69179e-06
GO_CC_MM_APICAL_PART_OF_CELL	17	82	2.93518e-07	6.73388e-06
GO_MF_MM_GTPASE_ACTIVATOR_ACTIVITY	21	121	3.04777e-07	6.98483e-06
MPO_MM_ALOPECIA	20	111	3.09088e-07	7.04965e-06
MPO_MM_ENLARGED_LYMPH_NODES	23	142	3.09765e-07	7.04965e-06
GO_BP_MM_SKELETAL_SYSTEM_MORPHOGENESIS	12	41	3.09875e-07	7.04965e-06
KEGG_MM_LYSINE_DEGRADATION	12	41	3.09875e-07	7.04965e-06
MPO_MM_ABNORMAL_COAT_APPEARANCE	12	41	3.09875e-07	7.04965e-06
MPO_MM_ABNORMAL_MUSCLE_CELL_GLUCOSE_UPTAKE	12	41	3.09875e-07	7.04965e-06
TF_MM_ZHAO_USF1	12	41	3.09875e-07	7.04965e-06
GO_MF_MM_CYCLIN-DEPENDENT_PROTEIN_KINASE_REGULATOR_ACTIVITY	6	8	3.11322e-07	7.06779e-06
GO_BP_MM_S-ADENOSYLHOMOCYSTEINE_METABOLIC_PROCESS	6	8	3.11322e-07	7.06779e-06
REACTOME_MM_COL2A1_PATHWAY	15	65	3.33657e-07	7.56694e-06
MPO_MM_ABNORMAL_SPATIAL_LEARNING	26	176	3.52472e-07	7.96501e-06
GO_MF_MM_PROTEIN_C-TERMINUS_BINDING	23	143	3.52492e-07	7.96501e-06
GO_BP_MM_CATION_TRANSPORT	17	83	3.52674e-07	7.96501e-06
MPO_MM_DEAFNESS	17	83	3.52674e-07	7.96501e-06
PID_MM_CXCR4-MEDIATED_SIGNALING_EVENTS	19	102	3.54022e-07	7.98716e-06
MPO_MM_DECREASED_EATING_BEHAVIOR	16	74	3.55238e-07	8.0063e-06
INOH_MM_ARGININE_PROLINE_METABOLISM	13	49	3.56081e-07	8.01553e-06
MPO_MM_INCREASED_SUSCEPTIBILITY_TO_BACTERIAL_INFECTION	28	199	3.56385e-07	8.01553e-06
GO_BP_MM_EMBRYO_DEVELOPMENT	20	112	3.594e-07	8.075e-06
PANTHER_MM_VEGF_SIGNALING_PATHWAY	14	57	3.59774e-07	8.07505e-06
GO_CC_MM_EXTERNAL_SIDE_OF_PLASMA_MEMBRANE	29	211	3.67629e-07	8.24286e-06
GO_BP_MM_RESPONSE_TO_LIPID	7	12	3.70058e-07	8.27173e-06
GO_BP_MM_PHOSPHOLIPID_EFFLUX	7	12	3.70058e-07	8.27173e-06
BIOCARTA_MM_ACUTE_MYOCARDIAL_INFARCTION	7	12	3.70058e-07	8.27173e-06
GO_BP_MM_DNA_METABOLIC_PROCESS	9	22	3.7207e-07	8.29115e-06
MPO_MM_ABNORMAL_PHOSPHOLIPID_LEVEL	9	22	3.7207e-07	8.29115e-06
MOUSECYC_MM_PWY-5328_SUPERPATHWAY_OF_METHIONINE_DEGRADATION	9	22	3.7207e-07	8.29115e-06
GO_BP_MM_GLYCOGEN_METABOLIC_PROCESS	10	28	3.73984e-07	8.29978e-06
MPO_MM_ABNORMAL_PANCREAS_DEVELOPMENT	10	28	3.73984e-07	8.29978e-06
PID_MM_BETA2_INTEGRIN_CELL_SURFACE_INTERACTIONS	10	28	3.73984e-07	8.29978e-06
PANTHER_MM_FAS_SIGNALING_PATHWAY	10	28	3.73984e-07	8.29978e-06
KEGG_MM_TIGHT_JUNCTION	22	133	3.82159e-07	8.47255e-06
KEGG_MM_PURINE_METABOLISM	25	166	4.05097e-07	8.97195e-06
PID_MM_SIGNALING_EVENTS_MEDIATED_BY_VEGFR1_AND_VEGFR2	15	66	4.12672e-07	9.13041e-06
GO_CC_MM_BASEMENT_MEMBRANE	17	84	4.22461e-07	9.33749e-06
REACTOME_MM_NDUFA10_PATHWAY	11	35	4.32041e-07	9.52989e-06
INOH_MM_PYRUVATE_METABOLISM	11	35	4.32041e-07	9.52989e-06
GO_MF_MM_NUCLEOSIDE-TRIPHOSPHATASE_ACTIVITY	22	134	4.36644e-07	9.62166e-06
GO_BP_MM_FEMALE_PREGNANCY	14	58	4.53328e-07	9.95321e-06
GO_CC_MM_CAVEOLA	14	58	4.53328e-07	9.95321e-06
SMPDB_MM_PROLIDASE_DEFICIENCY-PD	8	17	4.55352e-07	9.95321e-06
GO_BP_MM_NITROGEN_COMPOUND_METABOLIC_PROCESS	8	17	4.55352e-07	9.95321e-06
GO_BP_MM_REGULATION_OF_ANGIOGENESIS	8	17	4.55352e-07	9.95321e-06
KEGG_MM_SELENOCOMPOUND_METABOLISM	8	17	4.55352e-07	9.95321e-06
REACTOME_MM_PIP4K2B_PATHWAY	8	17	4.55352e-07	9.95321e-06
MPO_MM_SHORT_HAIR	8	17	4.55352e-07	9.95321e-06
GO_MF_MM_PROTEIN_PHOSPHATASE_BINDING	13	50	4.60056e-07	1.00058e-05
GO_CC_MM_INSOLUBLE_FRACTION	13	50	4.60056e-07	1.00058e-05
MPO_MM_DECREASED_PLATELET_AGGREGATION	13	50	4.60056e-07	1.00058e-05
INOH_MM_JAK_STAT_MOLECULARVARIATION_2	13	50	4.60056e-07	1.00058e-05
TF_MM_ZHAO_SP3	13	50	4.60056e-07	1.00058e-05
PANTHER_MM_WNT_SIGNALING_PATHWAY	33	262	4.68736e-07	1.01843e-05
GO_BP_MM_RESPONSE_TO_HORMONE_STIMULUS	15	67	5.08173e-07	1.10192e-05
GO_CC_MM_NUCLEAR_MATRIX	15	67	5.08173e-07	1.10192e-05
GO_CC_MM_ENDOPLASMIC_RETICULUM_LUMEN	16	76	5.2231e-07	1.13032e-05
MPO_MM_HYPERKERATOSIS	16	76	5.2231e-07	1.13032e-05
GO_CC_MM_CELL_LEADING_EDGE	10	29	5.46198e-07	1.17152e-05
GO_BP_MM_CHONDROCYTE_DIFFERENTIATION	10	29	5.46198e-07	1.17152e-05
GO_MF_MM_RNA_POLYMERASE_PROXIMAL_REGION_SEQUENCE-SPECIFIC_NEGATIVE_REGULATION_TRANSCRIPTION	10	29	5.46198e-07	1.17152e-05
GO_BP_MM_ACUTE-PHASE_RESPONSE	10	29	5.46198e-07	1.17152e-05
MIRTARBASE_MM_HSA-MIR-29B	10	29	5.46198e-07	1.17152e-05
MPO_MM_INCREASED_SUSCEPTIBILITY_TO_WEIGHT_LOSS	10	29	5.46198e-07	1.17152e-05
MPO_MM_MYOCARDIAL_FIBER_DEGENERATION	10	29	5.46198e-07	1.17152e-05
MPO_MM_SHORT_NASAL_BONE	10	29	5.46198e-07	1.17152e-05
TF_MM_FRIARD_V-MYB	10	29	5.46198e-07	1.17152e-05
MPO_MM_THICK_PULMONARY_INTERALVEOLAR_SEPTUM	12	43	5.50311e-07	1.17571e-05
PID_MM_INTEGRIN-LINKED_KINASE_SIGNALING	12	43	5.50311e-07	1.17571e-05
PID_MM_REGULATION_OF_RHOA_ACTIVITY	12	43	5.50311e-07	1.17571e-05
WIKIPATHWAYS_MM_DIURNALLY_REGULATED_GENES_WITH_CIRCADIAN_ORTHOLOGS-WP410	12	43	5.50311e-07	1.17571e-05
REACTOME_MM_CRK_PATHWAY	20	115	5.5865e-07	1.19235e-05
REACTOME_MM_ITGA2B_PATHWAY	14	59	5.68152e-07	1.21026e-05
TFACTS_MM_CEBPB	14	59	5.68152e-07	1.21026e-05
MPO_MM_ABNORMAL_TRIGLYCERIDE_LEVEL	9	23	5.85122e-07	1.24519e-05
GO_BP_MM_CELLULAR_RESPONSE_TO_GROWTH_FACTOR_STIMULUS	13	51	5.90332e-07	1.24773e-05
GO_MF_MM_NAD_BINDING	13	51	5.90332e-07	1.24773e-05
GO_BP_MM_OSTEOBLAST_DIFFERENTIATION	13	51	5.90332e-07	1.24773e-05
REACTOME_MM_ITGA2_PATHWAY	13	51	5.90332e-07	1.24773e-05
MPO_MM_ABNORMAL_HAIR_GROWTH	13	51	5.90332e-07	1.24773e-05
MPO_MM_INCOMPLETE_SOMITE_FORMATION	13	51	5.90332e-07	1.24773e-05
BIOCARTA_MM_HIV-I_NEF_NEGATIVE_EFFECTOR_OF_FAS_AND_TNF	13	51	5.90332e-07	1.24773e-05
REACTOME_MM_CD44_PATHWAY	11	36	5.95118e-07	1.25419e-05
REACTOME_MM_NDUFA1_PATHWAY	11	36	5.95118e-07	1.25419e-05
REACTOME_MM_PIK3R5_PATHWAY	11	36	5.95118e-07	1.25419e-05
GO_BP_MM_NEGATIVE_REGULATION_OF_NEURON_APOPTOTIC_PROCESS	17	86	6.0086e-07	1.26262e-05
KEGG_MM_ECM-RECEPTOR_INTERACTION	17	86	6.0086e-07	1.26262e-05
REACTOME_MM_CDKN1B_PATHWAY	17	86	6.0086e-07	1.26262e-05
KEGG_MM_CELL_CYCLE	21	126	6.12537e-07	1.28591e-05
GO_BP_MM_LIPID_CATABOLIC_PROCESS	15	68	6.23139e-07	1.30565e-05
REACTOME_MM_COL6A1_PATHWAY	15	68	6.23139e-07	1.30565e-05
BIOCARTA_MM_MAPKINASE_SIGNALING_PATHWAY	16	77	6.30035e-07	1.31883e-05
PANTHER_MM_INFLAMMATION_MEDIATED_BY_CHEMOKINE_AND_CYTOKINE_SIGNALING	29	217	6.65104e-07	1.3909e-05
GO_BP_MM_TRANSFORMING_GROWTH_FACTOR_BETA_RECEPTOR_SIGNALING_PATHWAY	14	60	7.08395e-07	1.47434e-05
KEGG_MM_INOSITOL_PHOSPHATE_METABOLISM	14	60	7.08395e-07	1.47434e-05
MPO_MM_ABNORMAL_MITOCHONDRIAL_PHYSIOLOGY	14	60	7.08395e-07	1.47434e-05
PID_MM_SIGNALING_EVENTS_MEDIATED_BY_HDAC_CLASS_I	14	60	7.08395e-07	1.47434e-05
WIKIPATHWAYS_MM_ENDOCHONDRAL_OSSIFICATION-WP474	14	60	7.08395e-07	1.47434e-05
MPO_MM_INCREASED_DOUBLE-NEGATIVE_T_CELL_NUMBER	17	87	7.13533e-07	1.48362e-05
MPO_MM_ABNORMAL_MAMMARY_GLAND_DEVELOPMENT	12	44	7.23625e-07	1.50173e-05
PID_MM_LKB1_SIGNALING_EVENTS	12	44	7.23625e-07	1.50173e-05
KEGG_MM_STARCH_AND_SUCROSE_METABOLISM	13	52	7.52557e-07	1.5588e-05
MPO_MM_ABNORMAL_PANCREAS_MORPHOLOGY	13	52	7.52557e-07	1.5588e-05
REACTOME_MM_ITGA1_PATHWAY	16	78	7.57436e-07	1.56741e-05
KEGG_MM_CALCIUM_SIGNALING_PATHWAY	26	183	7.59774e-07	1.56881e-05
GO_BP_MM_CELL_MORPHOGENESIS	15	69	7.61e-07	1.56881e-05
MPO_MM_ABNORMAL_SMALL_INTESTINE_MORPHOLOGY	15	69	7.61e-07	1.56881e-05
MPO_MM_SEMINIFEROUS_TUBULE_DEGENERATION	15	69	7.61e-07	1.56881e-05
GO_CC_MM_PODOSOME	7	13	7.68354e-07	1.57502e-05
GO_BP_MM_CELLULAR_ZINC_ION_HOMEOSTASIS	7	13	7.68354e-07	1.57502e-05
GO_BP_MM_POSITIVE_REGULATION_OF_SURVIVAL_GENE_PRODUCT_EXPRESSION	7	13	7.68354e-07	1.57502e-05
REACTOME_MM_ACACB_PATHWAY	7	13	7.68354e-07	1.57502e-05
MPO_MM_DECREASED_PROSTAGLANDIN_LEVEL	7	13	7.68354e-07	1.57502e-05
PANTHER_MM_PLASMINOGEN_ACTIVATING_CASCADE	7	13	7.68354e-07	1.57502e-05
GO_BP_MM_BROWN_FAT_CELL_DIFFERENTIATION	10	30	7.83973e-07	1.58518e-05
REACTOME_MM_A2M_PATHWAY	10	30	7.83973e-07	1.58518e-05
MPO_MM_ABNORMAL_BODY_WEIGHT	10	30	7.83973e-07	1.58518e-05
MPO_MM_POIKILOCYTOSIS	10	30	7.83973e-07	1.58518e-05
INOH_MM_FOLATE_METABOLISM	10	30	7.83973e-07	1.58518e-05
SMPDB_MM_ARDEPARIN_PATHWAY	8	18	7.84974e-07	1.58518e-05
SMPDB_MM_ARGININE_AND_PROLINE_METABOLISM	8	18	7.84974e-07	1.58518e-05
SMPDB_MM_ENOXAPARIN_PATHWAY	8	18	7.84974e-07	1.58518e-05
SMPDB_MM_FONDAPARINUX_PATHWAY	8	18	7.84974e-07	1.58518e-05
SMPDB_MM_GLUCONEOGENESIS	8	18	7.84974e-07	1.58518e-05
SMPDB_MM_HEPARIN_PATHWAY	8	18	7.84974e-07	1.58518e-05
KEGG_MM_ONE_CARBON_POOL_BY_FOLATE	8	18	7.84974e-07	1.58518e-05
REACTOME_MM_PIP5K1B_PATHWAY	8	18	7.84974e-07	1.58518e-05
MPO_MM_BOWED_TIBIA	8	18	7.84974e-07	1.58518e-05
MPO_MM_SMALL_PANCREAS	8	18	7.84974e-07	1.58518e-05
BIOCARTA_MM_AKT_SIGNALING_PATHWAY	8	18	7.84974e-07	1.58518e-05
KEGG_MM_EPSTEIN-BARR_VIRUS_INFECTION	28	207	8.03645e-07	1.62138e-05
GO_BP_MM_CELLULAR_IRON_ION_HOMEOSTASIS	11	37	8.10127e-07	1.62541e-05
REACTOME_MM_MT-ND6_PATHWAY	11	37	8.10127e-07	1.62541e-05
MPO_MM_ABNORMAL_EPIDIDYMIS_MORPHOLOGY	11	37	8.10127e-07	1.62541e-05
MPO_MM_DECREASED_OXYGEN_CONSUMPTION	11	37	8.10127e-07	1.62541e-05
MPO_MM_DECREASED_RENAL_GLOMERULUS_NUMBER	11	37	8.10127e-07	1.62541e-05
MPO_MM_DECREASED_SYSTEMIC_ARTERIAL_SYSTOLIC_BLOOD_PRESSURE	11	37	8.10127e-07	1.62541e-05
REACTOME_MM_CDKN1A_PATHWAY	17	88	8.4501e-07	1.69384e-05
REACTOME_MM_ACTN4_PATHWAY	20	118	8.54352e-07	1.70941e-05
MPO_MM_IMPAIRED_BALANCE	20	118	8.54352e-07	1.70941e-05
MPO_MM_ABNORMAL_ALLANTOIS_MORPHOLOGY	14	61	8.78881e-07	1.75526e-05
MPO_MM_ABNORMAL_RENAL_TUBULE_MORPHOLOGY	14	61	8.78881e-07	1.75526e-05
KEGG_MM_PYRIMIDINE_METABOLISM	18	98	8.85686e-07	1.76094e-05
MPO_MM_ABNORMAL_SUCKLING_BEHAVIOR	18	98	8.85686e-07	1.76094e-05
PID_MM_ERBB1_DOWNSTREAM_SIGNALING	18	98	8.85686e-07	1.76094e-05
GO_BP_MM_RESPONSE_TO_OXIDATIVE_STRESS	19	108	8.85774e-07	1.76094e-05
MPO_MM_SMALL_THYMUS	19	108	8.85774e-07	1.76094e-05
GO_BP_MM_COMPLEMENT_ACTIVATION_ALTERNATIVE_PATHWAY	6	9	8.95731e-07	1.7639e-05
SMPDB_MM_PYRIMIDINE_METABOLISM	9	24	8.96185e-07	1.7639e-05
GO_BP_MM_TISSUE_REGENERATION	9	24	8.96185e-07	1.7639e-05
GO_BP_MM_POSITIVE_REGULATION_OF_RHO_GTPASE_ACTIVITY	9	24	8.96185e-07	1.7639e-05
GO_BP_MM_POSITIVE_REGULATION_OF_CELL_CYCLE	9	24	8.96185e-07	1.7639e-05
GO_MF_MM_OXIDOREDUCTASE_ACTIVITY_ACTING_ON_THE_CH-CH_GROUP_OF_DONORS	9	24	8.96185e-07	1.7639e-05
MPO_MM_ABNORMAL_BASEMENT_MEMBRANE_MORPHOLOGY	9	24	8.96185e-07	1.7639e-05
MPO_MM_ABNORMAL_BRONCHUS_MORPHOLOGY	9	24	8.96185e-07	1.7639e-05
MPO_MM_ABNORMAL_PULMONARY_ALVEOLUS_EPITHELIAL_CELL_MORPHOLOGY	9	24	8.96185e-07	1.7639e-05
MPO_MM_DECREASED_CHOLESTEROL_LEVEL	9	24	8.96185e-07	1.7639e-05
WIKIPATHWAYS_MM_SREBP_SIGNALLING-WP1982	9	24	8.96185e-07	1.7639e-05
GO_BP_MM_CANONICAL_WNT_RECEPTOR_SIGNALING_PATHWAY	16	79	9.07644e-07	1.78484e-05
KEGG_MM_ADIPOCYTOKINE_SIGNALING_PATHWAY	15	70	9.25697e-07	1.81542e-05
REACTOME_MM_COL4A2_PATHWAY	15	70	9.25697e-07	1.81542e-05
MPO_MM_ABNORMAL_LONG_BONE_MORPHOLOGY	15	70	9.25697e-07	1.81542e-05
MPO_MM_DECREASED_THYMOCYTE_NUMBER	22	140	9.43131e-07	1.84402e-05
REACTOME_MM_INPP5B_PATHWAY	12	45	9.43672e-07	1.84402e-05
REACTOME_MM_LAMA1_PATHWAY	12	45	9.43672e-07	1.84402e-05
REACTOME_MM_OCRL_PATHWAY	12	45	9.43672e-07	1.84402e-05
GO_BP_MM_INNER_EAR_DEVELOPMENT	13	53	9.53378e-07	1.85465e-05
GO_BP_MM_LIPID_TRANSPORT	13	53	9.53378e-07	1.85465e-05
REACTOME_MM_ITGA5_PATHWAY	13	53	9.53378e-07	1.85465e-05
MPO_MM_AXON_DEGENERATION	13	53	9.53378e-07	1.85465e-05
MPO_MM_DECREASED_FETAL_WEIGHT	13	53	9.53378e-07	1.85465e-05
KEGG_MM_LEUKOCYTE_TRANSENDOTHELIAL_MIGRATION	20	119	9.80923e-07	1.90653e-05
REACTOME_MM_ACTR1A_PATHWAY	17	89	9.98036e-07	1.93806e-05
KEGG_MM_HEPATITIS_C	21	130	1.04069e-06	2.01908e-05
MPO_MM_ATAXIA	32	259	1.06327e-06	2.06106e-05
GO_CC_MM_GROWTH_CONE	16	80	1.08421e-06	2.09604e-05
MPO_MM_ABSENT_GASTRIC_MILK_IN_NEONATES	16	80	1.08421e-06	2.09604e-05
MPO_MM_INCREASED_MONOCYTE_CELL_NUMBER	16	80	1.08421e-06	2.09604e-05
REACTOME_MM_COL5A2_PATHWAY	14	62	1.0852e-06	2.09608e-05
REACTOME_MM_ARHGEF2_PATHWAY	11	38	1.09069e-06	2.09924e-05
REACTOME_MM_MT-ND5_PATHWAY	11	38	1.09069e-06	2.09924e-05
MPO_MM_HEMOPERICARDIUM	11	38	1.09069e-06	2.09924e-05
MPO_MM_INCREASED_SKIN_TUMOR_INCIDENCE	11	38	1.09069e-06	2.09924e-05
KEGG_MM_CIRCADIAN_RHYTHM	10	31	1.10742e-06	2.12955e-05
MPO_MM_ABNORMAL_MITOCHONDRIAL_MORPHOLOGY	15	71	1.12174e-06	2.15329e-05
WIKIPATHWAYS_MM_PROLACTIN_SIGNALING_PATHWAY-WP2037	15	71	1.12174e-06	2.15329e-05
MPO_MM_ABNORMAL_VERTEBRAE_MORPHOLOGY	19	110	1.18337e-06	2.26958e-05
GO_MF_MM_OXIDOREDUCTASE_ACTIVITY_ACTING_ON_THE_CH-OH_GROUP_OF_DONORS_NAD_OR_NADP_AS_ACCEPTOR	13	54	1.20058e-06	2.29652e-05
REACTOME_MM_CCNB1_PATHWAY	13	54	1.20058e-06	2.29652e-05
MPO_MM_INCREASED_CIRCULATING_CREATININE_LEVEL	13	54	1.20058e-06	2.29652e-05
MPO_MM_ABNORMAL_SKELETON_DEVELOPMENT	18	100	1.20496e-06	2.30287e-05
GO_BP_MM_CEREBRAL_CORTEX_DEVELOPMENT	12	46	1.221e-06	2.32943e-05
REACTOME_MM_ITGB7_PATHWAY	12	46	1.221e-06	2.32943e-05
WIKIPATHWAYS_MM_MICRORNAS_IN_CARDIOMYOCYTE_HYPERTROPHY-WP1544	16	81	1.29115e-06	2.4611e-05
GO_MF_MM_ADP_BINDING	8	19	1.29856e-06	2.46229e-05
REACTOME_MM_PIK3C2A_PATHWAY	8	19	1.29856e-06	2.46229e-05
REACTOME_MM_PIP4K2C_PATHWAY	8	19	1.29856e-06	2.46229e-05
REACTOME_MM_PPP2CB_PATHWAY	8	19	1.29856e-06	2.46229e-05
MPO_MM_INCREASED_RED_BLOOD_CELL_DISTRIBUTION_WIDTH	8	19	1.29856e-06	2.46229e-05
TF_MM_WINGENDER_EGR1	8	19	1.29856e-06	2.46229e-05
KEGG_MM_GLIOMA	14	63	1.33378e-06	2.51809e-05
REACTOME_MM_COL3A1_PATHWAY	14	63	1.33378e-06	2.51809e-05
REACTOME_MM_COL5A1_PATHWAY	14	63	1.33378e-06	2.51809e-05
REACTOME_MM_COL6A3_PATHWAY	14	63	1.33378e-06	2.51809e-05
MPO_MM_ABNORMAL_PHYSIOLOGICAL_RESPONSE_TO_XENOBIOTIC	14	63	1.33378e-06	2.51809e-05
GO_MF_MM_RECEPTOR_TYROSINE_KINASE_BINDING	9	25	1.34047e-06	2.51979e-05
GO_BP_MM_ACYL-COA_METABOLIC_PROCESS	9	25	1.34047e-06	2.51979e-05
REACTOME_MM_PI4KB_PATHWAY	9	25	1.34047e-06	2.51979e-05
MPO_MM_DECREASED_PANCREATIC_BETA_CELL_MASS	9	25	1.34047e-06	2.51979e-05
INOH_MM_GLUTAMATE_GLUTAMINE_METABOLISM	9	25	1.34047e-06	2.51979e-05
GO_MF_MM_TRANSCRIPTION_COACTIVATOR_ACTIVITY	21	132	1.34449e-06	2.52515e-05
GO_BP_MM_INTRACELLULAR_PROTEIN_KINASE_CASCADE	15	72	1.35428e-06	2.53916e-05
MPO_MM_GLIOSIS	15	72	1.35428e-06	2.53916e-05
REACTOME_MM_MAPK1_PATHWAY	19	111	1.36393e-06	2.55284e-05
MPO_MM_CLEFT_SECONDARY_PALATE	19	111	1.36393e-06	2.55284e-05
REACTOME_MM_AXIN1_PATHWAY	17	91	1.38147e-06	2.58346e-05
REACTOME_MM_MT-ND4L_PATHWAY	11	39	1.45327e-06	2.70943e-05
REACTOME_MM_PIK3R3_PATHWAY	11	39	1.45327e-06	2.70943e-05
GO_BP_MM_VALINE_METABOLIC_PROCESS	5	6	1.45506e-06	2.70943e-05
GO_BP_MM_CHYLOMICRON_REMNANT_CLEARANCE	5	6	1.45506e-06	2.70943e-05
MOUSECYC_MM_PWY-5177_GLUTARYL-COA_DEGRADATION	5	6	1.45506e-06	2.70943e-05
GO_BP_MM_GLYCOGEN_BIOSYNTHETIC_PROCESS	7	14	1.47266e-06	2.73052e-05
REACTOME_MM_ITPR1_PATHWAY	7	14	1.47266e-06	2.73052e-05
WIKIPATHWAYS_MM_GLUTATHIONE_METABOLISM-WP100	7	14	1.47266e-06	2.73052e-05
TF_MM_WINGENDER_PPARG	7	14	1.47266e-06	2.73052e-05
TFACTS_MM_FOXA1	7	14	1.47266e-06	2.73052e-05
KEGG_MM_GLYCEROLIPID_METABOLISM	13	55	1.50323e-06	2.78482e-05
KEGG_MM_CELL_ADHESION_MOLECULES	23	155	1.50673e-06	2.78892e-05
MPO_MM_ABNORMAL_TESTIS_MORPHOLOGY	16	82	1.533e-06	2.83141e-05
NETPATH_MM_RANKL_SIGNALING_PATHWAY	16	82	1.533e-06	2.83141e-05
MPO_MM_ABNORMAL_T_CELL_DIFFERENTIATION	22	144	1.53455e-06	2.83141e-05
MPO_MM_ABNORMAL_BROWN_ADIPOSE_TISSUE_MORPHOLOGY	10	32	1.5414e-06	2.83141e-05
MPO_MM_ABNORMAL_IMPULSE_CONDUCTING_SYSTEM_CONDUCTION	10	32	1.5414e-06	2.83141e-05
MPO_MM_ABNORMAL_XIPHOID_PROCESS_MORPHOLOGY	10	32	1.5414e-06	2.83141e-05
MPO_MM_DECREASED_SENSITIVITY_TO_XENOBIOTIC_INDUCED_MORBIDITY_MORTALITY	10	32	1.5414e-06	2.83141e-05
MPO_MM_EXPANDED_MESANGIAL_MATRIX	10	32	1.5414e-06	2.83141e-05
INOH_MM_FRUCTOSE_MANNOSE_METABOLISM	10	32	1.5414e-06	2.83141e-05
GO_MF_MM_TRANSFERASE_ACTIVITY_TRANSFERRING_ACYL_GROUPS_OTHER_THAN_AMINO-ACYL_GROUPS	12	47	1.56808e-06	2.87071e-05
KEGG_MM_AMINO_SUGAR_AND_NUCLEOTIDE_SUGAR_METABOLISM	12	47	1.56808e-06	2.87071e-05
MPO_MM_DILATED_HEART_ATRIUM	12	47	1.56808e-06	2.87071e-05
PID_MM_ANGIOPOIETIN_RECEPTOR_TIE2-MEDIATED_SIGNALING	12	47	1.56808e-06	2.87071e-05
GO_MF_MM_NUCLEIC_ACID_BINDING	89	1105	1.61072e-06	2.9463e-05
GO_BP_MM_NEGATIVE_REGULATION_OF_ENDOPEPTIDASE_ACTIVITY	14	64	1.63205e-06	2.96784e-05
GO_MF_MM_MOTOR_ACTIVITY	14	64	1.63205e-06	2.96784e-05
GO_MF_MM_DRUG_BINDING	14	64	1.63205e-06	2.96784e-05
MPO_MM_ABNORMAL_CARDIOVASCULAR_SYSTEM_MORPHOLOGY	14	64	1.63205e-06	2.96784e-05
MPO_MM_DECREASED_TUMOR_INCIDENCE	14	64	1.63205e-06	2.96784e-05
PID_MM_MTOR_SIGNALING_PATHWAY	14	64	1.63205e-06	2.96784e-05
PANTHER_MM_ALZHEIMER_DISEASE-AMYLOID_SECRETASE_PATHWAY	14	64	1.63205e-06	2.96784e-05
GO_CC_MM_NUCLEAR_MEMBRANE	20	123	1.67681e-06	3.04669e-05
EHMN_MM_PYRIMIDINE_METABOLISM	19	113	1.80201e-06	3.27145e-05
MPO_MM_ABNORMAL_PLACENTAL_LABYRINTH_VASCULATURE_MORPHOLOGY	16	83	1.81487e-06	3.28382e-05
MPO_MM_DOUBLE_OUTLET_HEART_RIGHT_VENTRICLE	16	83	1.81487e-06	3.28382e-05
MPO_MM_PALE_YOLK_SAC	16	83	1.81487e-06	3.28382e-05
PANTHER_MM_PARKINSON_DISEASE	16	83	1.81487e-06	3.28382e-05
GO_MF_MM_BETA-CATENIN_BINDING	13	56	1.87185e-06	3.3785e-05
GO_BP_MM_CELLULAR_RESPONSE_TO_LIPOPOLYSACCHARIDE	13	56	1.87185e-06	3.3785e-05
MPO_MM_ABNORMAL_INCISOR_MORPHOLOGY	13	56	1.87185e-06	3.3785e-05
GO_MF_MM_HEPARIN_BINDING	18	103	1.88154e-06	3.39036e-05
MPO_MM_INCREASED_SENSITIVITY_TO_XENOBIOTIC_INDUCED_MORBIDITY_MORTALITY	18	103	1.88154e-06	3.39036e-05
GO_BP_MM_NEGATIVE_REGULATION_OF_WNT_RECEPTOR_SIGNALING_PATHWAY	11	40	1.91757e-06	3.44102e-05
KEGG_MM_FRUCTOSE_AND_MANNOSE_METABOLISM	11	40	1.91757e-06	3.44102e-05
REACTOME_MM_MT-ND4_PATHWAY	11	40	1.91757e-06	3.44102e-05
MPO_MM_DECREASED_KIDNEY_WEIGHT	11	40	1.91757e-06	3.44102e-05
MPO_MM_DECREASED_PANCREATIC_BETA_CELL_NUMBER	11	40	1.91757e-06	3.44102e-05
MPO_MM_ABNORMAL_VASCULAR_DEVELOPMENT	15	74	1.95305e-06	3.50181e-05
GO_BP_MM_CELLULAR_RESPONSE_TO_HYDROGEN_PEROXIDE	9	26	1.96261e-06	3.51026e-05
KEGG_MM_ASCORBATE_AND_ALDARATE_METABOLISM	9	26	1.96261e-06	3.51026e-05
MPO_MM_ABNORMAL_EPIDIDYMAL_FAT_PAD_MORPHOLOGY	9	26	1.96261e-06	3.51026e-05
GO_BP_MM_ACTIVATION_OF_CYSTEINE-TYPE_ENDOPEPTIDASE_ACTIVITY_INVOLVED_IN_APOPTOTIC_PROCESS	14	65	1.98847e-06	3.54776e-05
REACTOME_MM_COL6A2_PATHWAY	14	65	1.98847e-06	3.54776e-05
MPO_MM_ABNORMAL_MANDIBLE_MORPHOLOGY	14	65	1.98847e-06	3.54776e-05
PANTHER_MM_PI3_KINASE_PATHWAY	12	48	1.99956e-06	3.56462e-05
KEGG_MM_CYTOKINE-CYTOKINE_RECEPTOR_INTERACTION	31	254	2.01661e-06	3.59208e-05
REACTOME_MM_HRAS_PATHWAY	19	114	2.06578e-06	3.67365e-05
MPO_MM_INCREASED_T_CELL_PROLIFERATION	19	114	2.06578e-06	3.67365e-05
GO_MF_MM_FATTY-ACYL-COA_BINDING	8	20	2.07286e-06	3.67422e-05
REACTOME_MM_PIP4K2A_PATHWAY	8	20	2.07286e-06	3.67422e-05
MPO_MM_DECREASED_VASODILATION	8	20	2.07286e-06	3.67422e-05
TFACTS_MM_PPARA	8	20	2.07286e-06	3.67422e-05
GO_CC_MM_PROTEINACEOUS_EXTRACELLULAR_MATRIX	26	193	2.1111e-06	3.73303e-05
REACTOME_MM_IRF1_PATHWAY	10	33	2.11634e-06	3.73303e-05
REACTOME_MM_NDUFA12_PATHWAY	10	33	2.11634e-06	3.73303e-05
MPO_MM_ABNORMAL_FAT_CELL_MORPHOLOGY	10	33	2.11634e-06	3.73303e-05
MPO_MM_ABNORMAL_MICROGLIAL_CELL_MORPHOLOGY	10	33	2.11634e-06	3.73303e-05
PANTHER_MM_INSULIN_IGF_PATHWAY-PROTEIN_KINASE_B_SIGNALING_CASCADE	10	33	2.11634e-06	3.73303e-05
MPO_MM_ABNORMAL_BONE_STRUCTURE	16	84	2.14249e-06	3.77311e-05
GO_BP_MM_BILE_ACID_BIOSYNTHETIC_PROCESS	6	10	2.14773e-06	3.77311e-05
GO_BP_MM_PROSTATE_GLAND_EPITHELIUM_MORPHOGENESIS	6	10	2.14773e-06	3.77311e-05
GO_BP_MM_TRIGLYCERIDE_CATABOLIC_PROCESS	6	10	2.14773e-06	3.77311e-05
MPO_MM_DECREASED_SYSTEMIC_ARTERIAL_DIASTOLIC_BLOOD_PRESSURE	6	10	2.14773e-06	3.77311e-05
TF_MM_FRIARD_MYOD	20	125	2.17169e-06	3.81211e-05
MPO_MM_CARDIAC_HYPERTROPHY	18	104	2.17392e-06	3.81294e-05
REACTOME_MM_ACTN2_PATHWAY	22	147	2.18207e-06	3.82107e-05
REACTOME_MM_ACTN3_PATHWAY	22	147	2.18207e-06	3.82107e-05
MPO_MM_ABNORMAL_DEVELOPMENTAL_PATTERNING	17	94	2.20852e-06	3.86119e-05
MPO_MM_ABNORMAL_RESPONSE_METABOLISM_TO_ENDOGENOUS_COMPOUNDS	17	94	2.20852e-06	3.86119e-05
MICROCOSM_TARGETS_MM_HSA-MIR-32	34	294	2.26261e-06	3.95257e-05
REACTOME_MM_CSNK1G1_PATHWAY	13	57	2.3186e-06	4.03419e-05
REACTOME_MM_CSNK1G2_PATHWAY	13	57	2.3186e-06	4.03419e-05
REACTOME_MM_CSNK1G3_PATHWAY	13	57	2.3186e-06	4.03419e-05
REACTOME_MM_HDAC2_PATHWAY	13	57	2.3186e-06	4.03419e-05
MPO_MM_GLOMERULOSCLEROSIS	13	57	2.3186e-06	4.03419e-05
MPO_MM_INCREASED_GRANULOCYTE_NUMBER	15	75	2.33344e-06	4.04382e-05
MPO_MM_INTERNAL_HEMORRHAGE	15	75	2.33344e-06	4.04382e-05
MPO_MM_SMALL_KIDNEY	15	75	2.33344e-06	4.04382e-05
NETPATH_MM_ALPHA6_BETA4_INTEGRIN	15	75	2.33344e-06	4.04382e-05
WIKIPATHWAYS_MM_ELECTRON_TRANSPORT_CHAIN-WP111	15	75	2.33344e-06	4.04382e-05
TZ_SCS_NEUTROPHILS	19	115	2.36407e-06	4.09364e-05
KEGG_MM_PANCREATIC_CANCER	14	66	2.41272e-06	4.17124e-05
MPO_MM_DISTENDED_ABDOMEN	14	66	2.41272e-06	4.17124e-05
KEGG_MM_UBIQUITIN_MEDIATED_PROTEOLYSIS	21	137	2.48924e-06	4.30012e-05
GO_BP_MM_HAIR_FOLLICLE_DEVELOPMENT	11	41	2.50705e-06	4.31376e-05
GO_BP_MM_LACTATION	11	41	2.50705e-06	4.31376e-05
REACTOME_MM_MT-ND3_PATHWAY	11	41	2.50705e-06	4.31376e-05
REACTOME_MM_RAC1_PATHWAY	11	41	2.50705e-06	4.31376e-05
MPO_MM_DISHEVELED_COAT	11	41	2.50705e-06	4.31376e-05
GO_BP_MM_PROTEIN_COMPLEX_ASSEMBLY	12	49	2.53258e-06	4.34735e-05
KEGG_MM_STAPHYLOCOCCUS_AUREUS_INFECTION	12	49	2.53258e-06	4.34735e-05
MIRTARBASE_MM_HSA-MIR-125B	12	49	2.53258e-06	4.34735e-05
KEGG_MM_ARACHIDONIC_ACID_METABOLISM	17	95	2.57028e-06	4.40861e-05
GO_BP_MM_LONG-CHAIN_FATTY_ACID_METABOLIC_PROCESS	7	15	2.64625e-06	4.51753e-05
GO_BP_MM_TRIGLYCERIDE_HOMEOSTASIS	7	15	2.64625e-06	4.51753e-05
GO_MF_MM_RHO_GTPASE_ACTIVATOR_ACTIVITY	7	15	2.64625e-06	4.51753e-05
GO_CC_MM_EXCITATORY_SYNAPSE	7	15	2.64625e-06	4.51753e-05
REACTOME_MM_ERG_PATHWAY	7	15	2.64625e-06	4.51753e-05
INOH_MM_STEROIDS_METABOLISM	7	15	2.64625e-06	4.51753e-05
PID_MM_C-MYB_TRANSCRIPTION_FACTOR_NETWORK	15	76	2.77879e-06	4.74008e-05
GO_BP_MM_PLATELET_ACTIVATION	9	27	2.81828e-06	4.78865e-05
REACTOME_MM_PI4KA_PATHWAY	9	27	2.81828e-06	4.78865e-05
MPO_MM_DECREASED_GONADAL_FAT_PAD_WEIGHT	9	27	2.81828e-06	4.78865e-05
MPO_MM_INCREASED_ENERGY_EXPENDITURE	9	27	2.81828e-06	4.78865e-05
TZ_ADRENAL_GLAND	9	27	2.81828e-06	4.78865e-05
GO_BP_MM_NEGATIVE_REGULATION_OF_CYSTEINE-TYPE_ENDOPEPTIDASE_ACTIVITY_INVOLVED_IN_APOPTOTIC_PROCESS	13	58	2.85746e-06	4.83722e-05
MPO_MM_DISTENDED_PERICARDIUM	13	58	2.85746e-06	4.83722e-05
MPO_MM_ENLARGED_PERICARDIUM	13	58	2.85746e-06	4.83722e-05
MPO_MM_INCREASED_SPLEEN_RED_PULP_AMOUNT	13	58	2.85746e-06	4.83722e-05
GO_BP_MM_RESPONSE_TO_ANTIBIOTIC	10	34	2.8691e-06	4.83722e-05
REACTOME_MM_NDUFA11_PATHWAY	10	34	2.8691e-06	4.83722e-05
MPO_MM_MALOCCLUSION	10	34	2.8691e-06	4.83722e-05
MPO_MM_PULMONARY_VASCULAR_CONGESTION	10	34	2.8691e-06	4.83722e-05
MPO_MM_THICK_SKIN	10	34	2.8691e-06	4.83722e-05
PID_MM_CLASS_I_PI3K_SIGNALING_EVENTS_MEDIATED_BY_AKT	10	34	2.8691e-06	4.83722e-05
MPO_MM_ABNORMAL_HIPPOCAMPUS_MORPHOLOGY	18	106	2.88492e-06	4.85636e-05
MPO_MM_INCREASED_NEURON_APOPTOSIS	18	106	2.88492e-06	4.85636e-05
GO_BP_MM_CYTOKINE-MEDIATED_SIGNALING_PATHWAY	14	67	2.91581e-06	4.89698e-05
REACTOME_MM_COL4A4_PATHWAY	14	67	2.91581e-06	4.89698e-05
MPO_MM_ABNORMAL_LONG_BONE_EPIPHYSEAL_PLATE_MORPHOLOGY	14	67	2.91581e-06	4.89698e-05
GO_CC_MM_LAMELLIPODIUM	17	96	2.98456e-06	5.00857e-05
GO_MF_MM_SERINE-TYPE_ENDOPEPTIDASE_INHIBITOR_ACTIVITY	19	117	3.08045e-06	5.16552e-05
WIKIPATHWAYS_MM_REGULATION_OF_ACTIN_CYTOSKELETON-WP51	21	139	3.1553e-06	5.28695e-05
GO_CC_MM_MYOSIN_COMPLEX	12	50	3.18705e-06	5.32375e-05
REACTOME_MM_IGF1_PATHWAY	12	50	3.18705e-06	5.32375e-05
REACTOME_MM_ITGA3_PATHWAY	12	50	3.18705e-06	5.32375e-05
MPO_MM_ABNORMAL_CELL_ADHESION	12	50	3.18705e-06	5.32375e-05
GO_BP_MM_CELLULAR_RESPONSE_TO_GLUCOSE_STIMULUS	8	21	3.20713e-06	5.32863e-05
GO_BP_MM_ACTIN_FILAMENT_BUNDLE_ASSEMBLY	8	21	3.20713e-06	5.32863e-05
GO_MF_MM_ENZYME_ACTIVATOR_ACTIVITY	8	21	3.20713e-06	5.32863e-05
REACTOME_MM_PPP2CA_PATHWAY	8	21	3.20713e-06	5.32863e-05
MIRTARBASE_MM_HSA-MIR-29C	8	21	3.20713e-06	5.32863e-05
MPO_MM_CONJUNCTIVITIS	8	21	3.20713e-06	5.32863e-05
MPO_MM_DECREASED_LIVER_REGENERATION	8	21	3.20713e-06	5.32863e-05
REACTOME_MM_ITGB5_PATHWAY	11	42	3.24944e-06	5.38249e-05
REACTOME_MM_ITGB6_PATHWAY	11	42	3.24944e-06	5.38249e-05
REACTOME_MM_ITGB8_PATHWAY	11	42	3.24944e-06	5.38249e-05
REACTOME_MM_MT-ND2_PATHWAY	11	42	3.24944e-06	5.38249e-05
GO_BP_MM_CELL_PROLIFERATION	23	162	3.25939e-06	5.39486e-05
PID_MM_REGULATION_OF_NUCLEAR_SMAD2_3_SIGNALING	15	77	3.29866e-06	5.4557e-05
MPO_MM_ABNORMAL_FOREBRAIN_MORPHOLOGY	18	107	3.31385e-06	5.47667e-05
GO_BP_MM_AXONOGENESIS	16	87	3.46807e-06	5.72284e-05
REACTOME_MM_NFKB1_PATHWAY	16	87	3.46807e-06	5.72284e-05
MPO_MM_DERMATITIS	14	68	3.5102e-06	5.78359e-05
TF_MM_ZHAO_NFKB1	14	68	3.5102e-06	5.78359e-05
GO_MF_MM_GROWTH_FACTOR_ACTIVITY	21	140	3.54568e-06	5.83762e-05
GO_BP_MM_PANCREAS_DEVELOPMENT	10	35	3.84393e-06	6.3048e-05
MPO_MM_ABNORMAL_OOCYTE_MORPHOLOGY	10	35	3.84393e-06	6.3048e-05
MPO_MM_SQUAMOUS_CELL_CARCINOMA	10	35	3.84393e-06	6.3048e-05
MPO_MM_TRANSPOSITION_OF_GREAT_ARTERIES	10	35	3.84393e-06	6.3048e-05
PID_MM_ERBB4_SIGNALING_EVENTS	10	35	3.84393e-06	6.3048e-05
MPO_MM_DECREASED_APOPTOSIS	15	78	3.90371e-06	6.3932e-05
MPO_MM_THIN_MYOCARDIUM	15	78	3.90371e-06	6.3932e-05
GO_MF_MM_AROMATASE_ACTIVITY	9	28	3.9761e-06	6.48734e-05
KEGG_MM_HISTIDINE_METABOLISM	9	28	3.9761e-06	6.48734e-05
MPO_MM_ABNORMAL_VISION	9	28	3.9761e-06	6.48734e-05
MPO_MM_DECREASED_MEAN_CORPUSCULAR_HEMOGLOBIN	9	28	3.9761e-06	6.48734e-05
MPO_MM_RENAL_CAST	9	28	3.9761e-06	6.48734e-05
GO_BP_MM_CELL-MATRIX_ADHESION	12	51	3.98605e-06	6.49382e-05
MPO_MM_ABNORMAL_TUMOR_NECROSIS_FACTOR_LEVEL	12	51	3.98605e-06	6.49382e-05
MPO_MM_ABNORMAL_HEMATOPOIESIS	20	130	4.03973e-06	6.57635e-05
KEGG_MM_PROTEIN_DIGESTION_AND_ABSORPTION	16	88	4.05097e-06	6.58972e-05
GO_BP_MM_GLYCOLYSIS	11	43	4.17727e-06	6.7749e-05
REACTOME_MM_MT-ND1_PATHWAY	11	43	4.17727e-06	6.7749e-05
MPO_MM_ABNORMAL_TOOTH_MORPHOLOGY	11	43	4.17727e-06	6.7749e-05
PANTHER_MM_P53_PATHWAY_FEEDBACK_LOOPS_2	11	43	4.17727e-06	6.7749e-05
REACTOME_MM_COL11A1_PATHWAY	13	60	4.27782e-06	6.91734e-05
REACTOME_MM_COL5A3_PATHWAY	13	60	4.27782e-06	6.91734e-05
MPO_MM_PURKINJE_CELL_DEGENERATION	13	60	4.27782e-06	6.91734e-05
WIKIPATHWAYS_MM_DNA_DAMAGE_RESPONSE-WP707	13	60	4.27782e-06	6.91734e-05
KEGG_MM_INFLUENZA_A	23	165	4.46742e-06	7.13205e-05
INOH_MM_GPCR_SIGNALING-G_ALPHA_S_PKA_AND_ERK	30	251	4.47676e-06	7.13205e-05
SMPDB_MM_ALTEPLASE_PATHWAY	7	16	4.50866e-06	7.13205e-05
SMPDB_MM_AMINOCAPROIC_ACID_PATHWAY	7	16	4.50866e-06	7.13205e-05
SMPDB_MM_ANISTREPLASE_PATHWAY	7	16	4.50866e-06	7.13205e-05
SMPDB_MM_APROTININ_PATHWAY	7	16	4.50866e-06	7.13205e-05
SMPDB_MM_RETEPLASE_PATHWAY	7	16	4.50866e-06	7.13205e-05
SMPDB_MM_STREPTOKINASE_PATHWAY	7	16	4.50866e-06	7.13205e-05
SMPDB_MM_TENECTEPLASE_PATHWAY	7	16	4.50866e-06	7.13205e-05
SMPDB_MM_TRANEXAMIC_ACID_PATHWAY	7	16	4.50866e-06	7.13205e-05
SMPDB_MM_UROKINASE_PATHWAY	7	16	4.50866e-06	7.13205e-05
GO_BP_MM_2-OXOGLUTARATE_METABOLIC_PROCESS	7	16	4.50866e-06	7.13205e-05
KEGG_MM_STEROID_BIOSYNTHESIS	7	16	4.50866e-06	7.13205e-05
KEGG_MM_PANTOTHENATE_AND_COA_BIOSYNTHESIS	7	16	4.50866e-06	7.13205e-05
EHMN_MM_VITAMIN_E_METABOLISM	7	16	4.50866e-06	7.13205e-05
MPO_MM_ABNORMAL_RESPIRATORY_SYSTEM_MORPHOLOGY	7	16	4.50866e-06	7.13205e-05
MPO_MM_FLAKY_SKIN	7	16	4.50866e-06	7.13205e-05
MPO_MM_INCREASED_LIVER_ADENOMA_INCIDENCE	7	16	4.50866e-06	7.13205e-05
MPO_MM_INCREASED_RENAL_TUBULE_APOPTOSIS	7	16	4.50866e-06	7.13205e-05
MPO_MM_PARTIAL_EMBRYONIC_LETHALITY_BEFORE_IMPLANTATION	7	16	4.50866e-06	7.13205e-05
INOH_MM_BUTANOATE_METABOLISM	7	16	4.50866e-06	7.13205e-05
GO_BP_MM_NEGATIVE_REGULATION_OF_CELL-SUBSTRATE_ADHESION	6	11	4.53193e-06	7.13205e-05
GO_MF_MM_GAMMA-CATENIN_BINDING	6	11	4.53193e-06	7.13205e-05
GO_BP_MM_RESPONSE_TO_GLUCAGON_STIMULUS	6	11	4.53193e-06	7.13205e-05
GO_MF_MM_HYDROLASE_ACTIVITY_ACTING_ON_CARBON-NITROGEN_BUT_NOT_PEPTIDE_BONDS_IN_LINEAR_AMIDES	6	11	4.53193e-06	7.13205e-05
GO_BP_MM_POSITIVE_REGULATION_OF_FATTY_ACID_BIOSYNTHETIC_PROCESS	6	11	4.53193e-06	7.13205e-05
REACTOME_MM_INPP1_PATHWAY	6	11	4.53193e-06	7.13205e-05
REACTOME_MM_ITPKA_PATHWAY	6	11	4.53193e-06	7.13205e-05
REACTOME_MM_ITPKB_PATHWAY	6	11	4.53193e-06	7.13205e-05
REACTOME_MM_TBCC_PATHWAY	6	11	4.53193e-06	7.13205e-05
EHMN_MM_DIMETHYL-BRANCHED-CHAIN_FATTY_ACID_MITOCHONDRIAL_BETA-OXIDATION	6	11	4.53193e-06	7.13205e-05
MPO_MM_ABNORMAL_BILE_SECRETION	6	11	4.53193e-06	7.13205e-05
MPO_MM_DECREASED_MAMMARY_GLAND_TUMOR_INCIDENCE	6	11	4.53193e-06	7.13205e-05
BIOCARTA_MM_COMPLEMENT_PATHWAY	6	11	4.53193e-06	7.13205e-05
WIKIPATHWAYS_MM_COMPLEMENT_ACTIVATION_CLASSICAL_PATHWAY-WP545	6	11	4.53193e-06	7.13205e-05
MOUSECYC_MM_PWY-2201_FOLATE_TRANSFORMATIONS	6	11	4.53193e-06	7.13205e-05
MOUSECYC_MM_PWY66-341_CHOLESTEROL_BIOSYNTHESIS_I	6	11	4.53193e-06	7.13205e-05
GO_CC_MM_LATE_ENDOSOME	15	79	4.60591e-06	7.22756e-05
KEGG_MM_RETINOL_METABOLISM	15	79	4.60591e-06	7.22756e-05
MPO_MM_DELAYED_BONE_OSSIFICATION	15	79	4.60591e-06	7.22756e-05
INOH_MM_JAK_STAT_MOLECULARVARIATION_1	15	79	4.60591e-06	7.22756e-05
SMPDB_MM_SPHINGOLIPID_METABOLISM	8	22	4.82716e-06	7.54751e-05
GO_MF_MM_STEROID_BINDING	8	22	4.82716e-06	7.54751e-05
REACTOME_MM_RHOQ_PATHWAY	8	22	4.82716e-06	7.54751e-05
EHMN_MM_BUTANOATE_METABOLISM	8	22	4.82716e-06	7.54751e-05
MPO_MM_DECREASED_CORPORA_LUTEA_NUMBER	8	22	4.82716e-06	7.54751e-05
GO_BP_MM_NEGATIVE_REGULATION_OF_FIBRINOLYSIS	5	7	4.88984e-06	7.62906e-05
GO_BP_MM_TAURINE_METABOLIC_PROCESS	5	7	4.88984e-06	7.62906e-05
GO_BP_MM_POSITIVE_REGULATION_OF_PROTEIN_HOMOOLIGOMERIZATION	5	7	4.88984e-06	7.62906e-05
GO_BP_MM_PROTEIN_HOMOTETRAMERIZATION	12	52	4.95609e-06	7.71583e-05
MPO_MM_ALBUMINURIA	12	52	4.95609e-06	7.71583e-05
MPO_MM_DECREASED_INCIDENCE_OF_CHEMICALLY-INDUCED_TUMORS	12	52	4.95609e-06	7.71583e-05
GO_BP_MM_MITOSIS	25	190	5.02928e-06	7.79351e-05
GO_CC_MM_MIDBODY	14	70	5.03108e-06	7.79351e-05
GO_BP_MM_MICROTUBULE-BASED_MOVEMENT	14	70	5.03108e-06	7.79351e-05
GO_BP_MM_NEGATIVE_REGULATION_OF_CANONICAL_WNT_RECEPTOR_SIGNALING_PATHWAY	14	70	5.03108e-06	7.79351e-05
KEGG_MM_BACTERIAL_INVASION_OF_EPITHELIAL_CELLS	14	70	5.03108e-06	7.79351e-05
KEGG_MM_MELANOMA	14	70	5.03108e-06	7.79351e-05
MPO_MM_INCREASED_IGG_LEVEL	14	70	5.03108e-06	7.79351e-05
GO_CC_MM_INTEGRAL_TO_GOLGI_MEMBRANE	10	36	5.09347e-06	7.85659e-05
GO_CC_MM_ADHERENS_JUNCTION	10	36	5.09347e-06	7.85659e-05
GO_BP_MM_NEURON_PROJECTION_MORPHOGENESIS	10	36	5.09347e-06	7.85659e-05
REACTOME_MM_CASP2_PATHWAY	10	36	5.09347e-06	7.85659e-05
PID_MM_REGULATION_OF_RAC1_ACTIVITY	10	36	5.09347e-06	7.85659e-05
BIOCARTA_MM_KERATINOCYTE_DIFFERENTIATION	10	36	5.09347e-06	7.85659e-05
KEGG_MM_MEASLES	20	132	5.12751e-06	7.9016e-05
KEGG_MM_NEUROTROPHIN_SIGNALING_PATHWAY	19	121	5.12992e-06	7.9016e-05
GO_BP_MM_REGULATION_OF_PROTEOLYSIS	13	61	5.19836e-06	7.99005e-05
REACTOME_MM_COL11A2_PATHWAY	13	61	5.19836e-06	7.99005e-05
REACTOME_MM_ITGA4_PATHWAY	13	61	5.19836e-06	7.99005e-05
GO_BP_MM_CHOLESTEROL_ESTERIFICATION	4	4	5.27531e-06	8.05707e-05
GO_BP_MM_HISTIDINE_CATABOLIC_PROCESS_TO_GLUTAMATE_AND_FORMAMIDE	4	4	5.27531e-06	8.05707e-05
GO_BP_MM_HISTIDINE_CATABOLIC_PROCESS_TO_GLUTAMATE_AND_FORMATE	4	4	5.27531e-06	8.05707e-05
GO_MF_MM_AMINOACYLASE_ACTIVITY	4	4	5.27531e-06	8.05707e-05
GO_BP_MM_NEGATIVE_REGULATION_OF_CHOLESTEROL_TRANSPORT	4	4	5.27531e-06	8.05707e-05
GO_BP_MM_INTERNAL_PROTEIN_AMINO_ACID_ACETYLATION	4	4	5.27531e-06	8.05707e-05
GO_BP_MM_ISOLEUCINE_METABOLIC_PROCESS	4	4	5.27531e-06	8.05707e-05
GO_BP_MM_HETEROCYCLE_METABOLIC_PROCESS	4	4	5.27531e-06	8.05707e-05
REACTOME_MM_F13B_PATHWAY	4	4	5.27531e-06	8.05707e-05
MPO_MM_ABNORMAL_CELL_MORPHOLOGY	17	100	5.3101e-06	8.09282e-05
MPO_MM_ABNORMAL_EPIDERMAL_LAYER_MORPHOLOGY	17	100	5.3101e-06	8.09282e-05
GO_CC_MM_FILOPODIUM	11	44	5.32848e-06	8.09282e-05
MPO_MM_ABNORMAL_VASCULAR_ENDOTHELIAL_CELL_MORPHOLOGY	11	44	5.32848e-06	8.09282e-05
MPO_MM_ABNORMAL_VERTEBRAL_ARCH_MORPHOLOGY	11	44	5.32848e-06	8.09282e-05
MPO_MM_INCREASED_SYSTEMIC_ARTERIAL_BLOOD_PRESSURE	11	44	5.32848e-06	8.09282e-05
PID_MM_CERAMIDE_SIGNALING_PATHWAY	11	44	5.32848e-06	8.09282e-05
PID_MM_CLASS_I_PI3K_SIGNALING_EVENTS	11	44	5.32848e-06	8.09282e-05
GO_BP_MM_ELECTRON_TRANSPORT_CHAIN	15	80	5.41861e-06	8.21823e-05
GO_MF_MM_ACID-AMINO_ACID_LIGASE_ACTIVITY	15	80	5.41861e-06	8.21823e-05
GO_CC_MM_BRUSH_BORDER	9	29	5.51956e-06	8.35385e-05
MPO_MM_POLYCYSTIC_KIDNEY	9	29	5.51956e-06	8.35385e-05
BIOCARTA_MM_FAS_SIGNALING_PATHWAY_CD95_	9	29	5.51956e-06	8.35385e-05
GO_BP_MM_DNA_REPLICATION	18	111	5.665e-06	8.55018e-05
MPO_MM_ABNORMAL_AXON_MORPHOLOGY	18	111	5.665e-06	8.55018e-05
MPO_MM_ASTHENOZOOSPERMIA	18	111	5.665e-06	8.55018e-05
WIKIPATHWAYS_MM_TGF_BETA_SIGNALING_PATHWAY-WP366	18	111	5.665e-06	8.55018e-05
MPO_MM_ABNORMAL_RETINAL_PIGMENT_EPITHELIUM_MORPHOLOGY	14	71	5.99126e-06	9.03634e-05
INOH_MM_GPCR_SIGNALING-G_ALPHA_Q	29	242	6.08341e-06	9.16895e-05
MPO_MM_ABNORMAL_PLACENTA_LABYRINTH_MORPHOLOGY	17	101	6.10125e-06	9.18312e-05
MPO_MM_KINKED_TAIL	17	101	6.10125e-06	9.18312e-05
REACTOME_MM_SMAD4_PATHWAY	12	53	6.12762e-06	9.18467e-05
MPO_MM_ABNORMAL_PLACENTA_VASCULATURE	12	53	6.12762e-06	9.18467e-05
MPO_MM_DILATED_HEART_RIGHT_VENTRICLE	12	53	6.12762e-06	9.18467e-05
MPO_MM_KIDNEY_INFLAMMATION	12	53	6.12762e-06	9.18467e-05
TF_MM_ZHAO_NFIC	12	53	6.12762e-06	9.18467e-05
TFACTS_MM_RARA	12	53	6.12762e-06	9.18467e-05
MPO_MM_ABNORMAL_MYELOPOIESIS	13	62	6.28961e-06	9.3951e-05
MPO_MM_ABNORMAL_THYMUS_MORPHOLOGY	13	62	6.28961e-06	9.3951e-05
MPO_MM_DILATED_CARDIOMYOPATHY	13	62	6.28961e-06	9.3951e-05
MPO_MM_DILUTED_COAT_COLOR	13	62	6.28961e-06	9.3951e-05
MPO_MM_IMPAIRED_LIMB_COORDINATION	13	62	6.28961e-06	9.3951e-05
REACTOME_MM_JAK1_PATHWAY	15	81	6.35667e-06	9.484e-05
MPO_MM_ABNORMAL_NEURONAL_MIGRATION	16	91	6.3622e-06	9.484e-05
TF_MM_FRIARD_IY	16	91	6.3622e-06	9.484e-05
PANTHER_MM_ALZHEIMER_DISEASE-PRESENILIN_PATHWAY	18	112	6.44931e-06	9.60726e-05
MPO_MM_ABNORMAL_SEMINIFEROUS_TUBULE_MORPHOLOGY	20	134	6.47355e-06	9.63018e-05
MPO_MM_CLEFT_PALATE	20	134	6.47355e-06	9.63018e-05
GO_CC_MM_SYNAPTOSOME	19	123	6.55925e-06	9.751e-05
GO_CC_MM_RECYCLING_ENDOSOME	10	37	6.67989e-06	9.88306e-05
GO_MF_MM_TRANSMEMBRANE_RECEPTOR_PROTEIN_TYROSINE_KINASE_ACTIVITY	10	37	6.67989e-06	9.88306e-05
GO_CC_MM_LIPID_PARTICLE	10	37	6.67989e-06	9.88306e-05
KEGG_MM_BLADDER_CANCER	10	37	6.67989e-06	9.88306e-05
REACTOME_MM_APP_PATHWAY	10	37	6.67989e-06	9.88306e-05
REACTOME_MM_ITGAX_PATHWAY	10	37	6.67989e-06	9.88306e-05
MPO_MM_ABNORMAL_LENS_DEVELOPMENT	10	37	6.67989e-06	9.88306e-05
GO_CC_MM_STRESS_FIBER	11	45	6.7471e-06	9.96216e-05
REACTOME_MM_PRKCA_PATHWAY	11	45	6.7471e-06	9.96216e-05
PID_MM_IL6-MEDIATED_SIGNALING_EVENTS	11	45	6.7471e-06	9.96216e-05
TF_MM_ZHAO_TCFAP2A	17	102	6.99646e-06	0.000103233
MPO_MM_INCREASED_ADIPONECTIN_LEVEL	8	23	7.08958e-06	0.000104395
MPO_MM_INCREASED_BODY_TEMPERATURE	8	23	7.08958e-06	0.000104395
WIKIPATHWAYS_MM_FSH_SIGNALING_PATHWAY-WP2035	8	23	7.08958e-06	0.000104395
MPO_MM_ABNORMAL_COMMON_MYELOID_PROGENITOR_CELL_MORPHOLOGY	14	72	7.11054e-06	0.000104421
MPO_MM_ASTROCYTOSIS	14	72	7.11054e-06	0.000104421
MPO_MM_SKIN_LESIONS	14	72	7.11054e-06	0.000104421
NETPATH_MM_IL4_SIGNALING_PATHWAY	14	72	7.11054e-06	0.000104421
SMPDB_MM_ARGATROBAN_PATHWAY	7	17	7.34598e-06	0.00010694
SMPDB_MM_BIVALIRUDIN_PATHWAY	7	17	7.34598e-06	0.00010694
SMPDB_MM_FRUCTOSE_AND_MANNOSE_DEGRADATION	7	17	7.34598e-06	0.00010694
SMPDB_MM_LEPIRUDIN_PATHWAY	7	17	7.34598e-06	0.00010694
SMPDB_MM_XIMELAGATRAN_PATHWAY	7	17	7.34598e-06	0.00010694
GO_BP_MM_LIPID_STORAGE	7	17	7.34598e-06	0.00010694
GO_CC_MM_HIGH-DENSITY_LIPOPROTEIN_PARTICLE	7	17	7.34598e-06	0.00010694
REACTOME_MM_C3_PATHWAY	7	17	7.34598e-06	0.00010694
MIRTARBASE_MM_HSA-MIR-218	7	17	7.34598e-06	0.00010694
MPO_MM_ABNORMAL_CORPUS_LUTEUM_MORPHOLOGY	7	17	7.34598e-06	0.00010694
MPO_MM_ABNORMAL_PULMONARY_ARTERY_MORPHOLOGY	7	17	7.34598e-06	0.00010694
MPO_MM_INCREASED_MORTALITY_INDUCED_BY_IONIZING_RADIATION	7	17	7.34598e-06	0.00010694
BIOCARTA_MM_ADP-RIBOSYLATION_FACTOR	7	17	7.34598e-06	0.00010694
GO_MF_MM_RNA_POLYMERASE_II_DISTAL_ENHANCER_SEQUENCE-SPECIFIC_DNA_BINDING_TRANSCRIPTION_FACTOR_ACTIVITY	16	92	7.36072e-06	0.000107083
MPO_MM_COMPLETE_PREWEANING_LETHALITY	19	124	7.40059e-06	0.000107591
PANTHER_MM_NICOTINIC_ACETYLCHOLINE_RECEPTOR_SIGNALING_PATHWAY	15	82	7.4366e-06	0.000108042
REACTOME_MM_CALML5_PATHWAY	12	54	7.53535e-06	0.000109021
REACTOME_MM_CALML6_PATHWAY	12	54	7.53535e-06	0.000109021
GO_BP_MM_POSITIVE_REGULATION_OF_CELL_ADHESION	9	30	7.54909e-06	0.000109021
GO_CC_MM_CLEAVAGE_FURROW	9	30	7.54909e-06	0.000109021
KEGG_MM_PENTOSE_PHOSPHATE_PATHWAY	9	30	7.54909e-06	0.000109021
REACTOME_MM_PDGFRB_PATHWAY	9	30	7.54909e-06	0.000109021
REACTOME_MM_RAC2_PATHWAY	9	30	7.54909e-06	0.000109021
REACTOME_MM_RAC3_PATHWAY	9	30	7.54909e-06	0.000109021
MPO_MM_CHRONIC_INFLAMMATION	9	30	7.54909e-06	0.000109021
KEGG_MM_WNT_SIGNALING_PATHWAY	21	147	7.75605e-06	0.000111935
MPO_MM_THIN_VENTRICULAR_WALL	17	103	8.00755e-06	0.000115488
TF_MM_FRIARD_ELF-1	20	136	8.13084e-06	0.000117189
GO_MF_MM_SH3_DOMAIN_BINDING	18	114	8.31686e-06	0.00011979
MPO_MM_OBESE	14	73	8.4112e-06	0.000121069
GO_BP_MM_AUTOPHAGY	11	46	8.48387e-06	0.000121632
GO_MF_MM_PROTEIN_TYROSINE_SERINE_THREONINE_PHOSPHATASE_ACTIVITY	11	46	8.48387e-06	0.000121632
REACTOME_MM_KDR_PATHWAY	11	46	8.48387e-06	0.000121632
REACTOME_MM_LAMA3_PATHWAY	11	46	8.48387e-06	0.000121632
MPO_MM_ABNORMAL_PANCREATIC_BETA_CELL_MORPHOLOGY	11	46	8.48387e-06	0.000121632
MPO_MM_ABNORMAL_SOMITE_SIZE	11	46	8.48387e-06	0.000121632
GO_BP_MM_PROTEIN_OLIGOMERIZATION	10	38	8.67604e-06	0.00012318
WIKIPATHWAYS_MM_NUCLEAR_RECEPTORS-WP170	10	38	8.67604e-06	0.00012318
MOUSECYC_MM_PWY66-241_BUPROPION_DEGRADATION	10	38	8.67604e-06	0.00012318
KEGG_MM_TGF-BETA_SIGNALING_PATHWAY	15	83	8.67669e-06	0.00012318
MPO_MM_PERICARDIAL_EFFUSION	15	83	8.67669e-06	0.00012318
SMPDB_MM_FATTY_ACID_METABOLISM	6	12	8.6938e-06	0.00012318
GO_BP_MM_VERY_LONG-CHAIN_FATTY_ACID_METABOLIC_PROCESS	6	12	8.6938e-06	0.00012318
GO_CC_MM_CHYLOMICRON	6	12	8.6938e-06	0.00012318
GO_BP_MM_REVERSE_CHOLESTEROL_TRANSPORT	6	12	8.6938e-06	0.00012318
REACTOME_MM_ITPR2_PATHWAY	6	12	8.6938e-06	0.00012318
REACTOME_MM_ITPR3_PATHWAY	6	12	8.6938e-06	0.00012318
MIRTARBASE_MM_HSA-MIR-503	6	12	8.6938e-06	0.00012318
MPO_MM_ABNORMAL_HAIR_FOLLICLE_MELANOCYTE_MORPHOLOGY	6	12	8.6938e-06	0.00012318
MPO_MM_DECREASED_SUSCEPTIBILITY_TO_WEIGHT_GAIN	6	12	8.6938e-06	0.00012318
MPO_MM_DILATED_UTERUS	6	12	8.6938e-06	0.00012318
MPO_MM_ENDOMETRIUM_HYPERPLASIA	6	12	8.6938e-06	0.00012318
MOUSECYC_MM_PWY-6309_TRYPTOPHAN_DEGRADATION_XI_MAMMALIAN_VIA_KYNURENINE	6	12	8.6938e-06	0.00012318
TF_MM_WINGENDER_E2F-1	6	12	8.6938e-06	0.00012318
MPO_MM_INCREASED_MACROPHAGE_CELL_NUMBER	13	64	9.09379e-06	0.000128616
WIKIPATHWAYS_MM_TSH_SIGNALING_PATHWAY-WP2032	13	64	9.09379e-06	0.000128616
GO_MF_MM_ATPASE_ACTIVITY	20	137	9.09521e-06	0.000128616
KEGG_MM_AMYOTROPHIC_LATERAL_SCLEROSIS	12	55	9.21873e-06	0.00012994
REACTOME_MM_ARHGEF7_PATHWAY	12	55	9.21873e-06	0.00012994
REACTOME_MM_CALML3_PATHWAY	12	55	9.21873e-06	0.00012994
MPO_MM_INCREASED_T_CELL_APOPTOSIS	12	55	9.21873e-06	0.00012994
MPO_MM_SMALL_HEART	12	55	9.21873e-06	0.00012994
MPO_MM_ABNORMAL_CELL_CYCLE	18	115	9.4215e-06	0.000132713
GO_MF_MM_PHOSPHOTRANSFERASE_ACTIVITY_ALCOHOL_GROUP_AS_ACCEPTOR	16	94	9.78672e-06	0.000137768
REACTOME_MM_ACTA2_PATHWAY	14	74	9.9181e-06	0.000139347
REACTOME_MM_ACTG2_PATHWAY	14	74	9.9181e-06	0.000139347
MPO_MM_PERICARDIAL_EDEMA	14	74	9.9181e-06	0.000139347
GO_MF_MM_PDZ_DOMAIN_BINDING	15	84	1.00972e-05	0.000141771
GO_BP_MM_PHAGOCYTOSIS	9	31	1.01843e-05	0.000142196
MPO_MM_ABNORMAL_HEMATOPOIETIC_SYSTEM_MORPHOLOGY_DEVELOPMENT	9	31	1.01843e-05	0.000142196
MPO_MM_DECREASED_THYMUS_WEIGHT	9	31	1.01843e-05	0.000142196
BIOCARTA_MM_P38_MAPK_SIGNALING_PATHWAY_	9	31	1.01843e-05	0.000142196
WIKIPATHWAYS_MM_P38_MAPK_SIGNALING_PATHWAY-WP400	9	31	1.01843e-05	0.000142196
GO_MF_MM_AMINO_ACID_BINDING	8	24	1.01863e-05	0.000142196
EHMN_MM_HISTIDINE_METABOLISM	8	24	1.01863e-05	0.000142196
MPO_MM_ABNORMAL_BILE_DUCT_MORPHOLOGY	8	24	1.01863e-05	0.000142196
MPO_MM_INCREASED_CHOLESTEROL_LEVEL	8	24	1.01863e-05	0.000142196
MPO_MM_ABNORMAL_OVARIAN_FOLLICLE_MORPHOLOGY	11	47	1.0597e-05	0.000147551
MPO_MM_DELAYED_WOUND_HEALING	11	47	1.0597e-05	0.000147551
MPO_MM_KIDNEY_FAILURE	11	47	1.0597e-05	0.000147551
PID_MM_FOXO_FAMILY_SIGNALING	11	47	1.0597e-05	0.000147551
REACTOME_MM_LCK_PATHWAY	13	65	1.08701e-05	0.00015116
INOH_MM_IL-1_P38	13	65	1.08701e-05	0.00015116
GO_MF_MM_CHAPERONE_BINDING	10	39	1.11666e-05	0.000154887
GO_MF_MM_PROTEIN_KINASE_C_BINDING	10	39	1.11666e-05	0.000154887
GO_BP_MM_CYTOKINESIS	10	39	1.11666e-05	0.000154887
MPO_MM_ABNORMAL_MECKELS_CARTILAGE_MORPHOLOGY	10	39	1.11666e-05	0.000154887
GO_BP_MM_RESPONSE_TO_CAMP	12	56	1.12224e-05	0.000155166
REACTOME_MM_DKFZP434N071_PATHWAY	12	56	1.12224e-05	0.000155166
REACTOME_MM_EGR1_PATHWAY	12	56	1.12224e-05	0.000155166
REACTOME_MM_ERBB4_PATHWAY	12	56	1.12224e-05	0.000155166
MPO_MM_HYDROPS_FETALIS	12	56	1.12224e-05	0.000155166
SMPDB_MM_ACENOCOUMAROL_PATHWAY	7	18	1.15212e-05	0.000157693
SMPDB_MM_DICUMAROL_PATHWAY	7	18	1.15212e-05	0.000157693
SMPDB_MM_PHENPROCOUMON_PATHWAY	7	18	1.15212e-05	0.000157693
SMPDB_MM_WARFARIN_PATHWAY	7	18	1.15212e-05	0.000157693
GO_BP_MM_SMAD_PROTEIN_SIGNAL_TRANSDUCTION	7	18	1.15212e-05	0.000157693
GO_BP_MM_DNA_DAMAGE_RESPONSE_SIGNAL_TRANSDUCTION_RESULTING_IN_INDUCTION_OF_APOPTOSIS	7	18	1.15212e-05	0.000157693
GO_MF_MM_CHOLESTEROL_BINDING	7	18	1.15212e-05	0.000157693
KEGG_MM_RENIN-ANGIOTENSIN_SYSTEM	7	18	1.15212e-05	0.000157693
MIRTARBASE_MM_HSA-MIR-424	7	18	1.15212e-05	0.000157693
MPO_MM_DECREASED_INFARCTION_SIZE	7	18	1.15212e-05	0.000157693
MPO_MM_FOCAL_HEPATIC_NECROSIS	7	18	1.15212e-05	0.000157693
MPO_MM_INCREASED_CELLULAR_SENSITIVITY_TO_OXIDATIVE_STRESS	7	18	1.15212e-05	0.000157693
MPO_MM_ROUGH_COAT	7	18	1.15212e-05	0.000157693
BIOCARTA_MM_MTOR_SIGNALING_PATHWAY	7	18	1.15212e-05	0.000157693
BIOCARTA_MM_TELOMERES_TELOMERASE_CELLULAR_AGING_AND_IMMORTALITY	7	18	1.15212e-05	0.000157693
WIKIPATHWAYS_MM_EICOSANOID_SYNTHESIS-WP167	7	18	1.15212e-05	0.000157693
REACTOME_MM_IL2_PATHWAY	14	75	1.16588e-05	0.000159377
TFACTS_MM_RELA	14	75	1.16588e-05	0.000159377
GO_BP_MM_REGULATION_OF_CELL_SHAPE	15	85	1.17203e-05	0.000160117
MPO_MM_INCREASED_TUMOR_INCIDENCE	21	151	1.18314e-05	0.000161533
GO_BP_MM_REGULATION_OF_FATTY_ACID_METABOLIC_PROCESS	5	8	1.25207e-05	0.000169454
GO_BP_MM_NEGATIVE_REGULATION_OF_SURVIVAL_GENE_PRODUCT_EXPRESSION	5	8	1.25207e-05	0.000169454
REACTOME_MM_DGKA_PATHWAY	5	8	1.25207e-05	0.000169454
REACTOME_MM_DGKB_PATHWAY	5	8	1.25207e-05	0.000169454
REACTOME_MM_DGKD_PATHWAY	5	8	1.25207e-05	0.000169454
REACTOME_MM_DGKE_PATHWAY	5	8	1.25207e-05	0.000169454
REACTOME_MM_DGKG_PATHWAY	5	8	1.25207e-05	0.000169454
REACTOME_MM_DGKH_PATHWAY	5	8	1.25207e-05	0.000169454
REACTOME_MM_DGKI_PATHWAY	5	8	1.25207e-05	0.000169454
REACTOME_MM_DGKQ_PATHWAY	5	8	1.25207e-05	0.000169454
REACTOME_MM_DGKZ_PATHWAY	5	8	1.25207e-05	0.000169454
REACTOME_MM_PIB5PA_PATHWAY	5	8	1.25207e-05	0.000169454
MOUSECYC_MM_PWY-5743_3-HYDROXYPROPIONATE_CYCLE	5	8	1.25207e-05	0.000169454
MOUSECYC_MM_PWY3FA-941_KETOGENESIS	5	8	1.25207e-05	0.000169454
MPO_MM_DECREASED_MOTOR_NEURON_NUMBER	13	66	1.29446e-05	0.000174973
MPO_MM_PERINATAL_LETHALITY	13	66	1.29446e-05	0.000174973
REACTOME_MM_IFNG_PATHWAY	11	48	1.3153e-05	0.000176911
REACTOME_MM_ITGA10_PATHWAY	11	48	1.3153e-05	0.000176911
REACTOME_MM_ITGA11_PATHWAY	11	48	1.3153e-05	0.000176911
REACTOME_MM_ITGA7_PATHWAY	11	48	1.3153e-05	0.000176911
REACTOME_MM_ITGA9_PATHWAY	11	48	1.3153e-05	0.000176911
REACTOME_MM_MET_PATHWAY	11	48	1.3153e-05	0.000176911
MPO_MM_INCREASED_KIDNEY_WEIGHT	11	48	1.3153e-05	0.000176911
PID_MM_CASPASE_CASCADE_IN_APOPTOSIS	11	48	1.3153e-05	0.000176911
GO_BP_MM_CELL_SURFACE_RECEPTOR_SIGNALING_PATHWAY	19	129	1.32486e-05	0.000178086
GO_BP_MM_NEGATIVE_REGULATION_OF_CELL_GROWTH	17	107	1.3488e-05	0.000180964
GO_CC_MM_MITOCHONDRIAL_RESPIRATORY_CHAIN_COMPLEX_I	9	32	1.35663e-05	0.000180964
GO_MF_MM_PHOSPHORIC_DIESTER_HYDROLASE_ACTIVITY	9	32	1.35663e-05	0.000180964
REACTOME_MM_ACTR1B_PATHWAY	9	32	1.35663e-05	0.000180964
REACTOME_MM_NDUFA13_PATHWAY	9	32	1.35663e-05	0.000180964
MPO_MM_ABNORMAL_HEMATOPOIETIC_STEM_CELL_MORPHOLOGY	9	32	1.35663e-05	0.000180964
MPO_MM_ABNORMAL_MACROPHAGE_MORPHOLOGY	9	32	1.35663e-05	0.000180964
MPO_MM_LIVER_HEMORRHAGE	9	32	1.35663e-05	0.000180964
MPO_MM_WAVY_NEURAL_TUBE	9	32	1.35663e-05	0.000180964
PID_MM_EPO_SIGNALING_PATHWAY	9	32	1.35663e-05	0.000180964
PID_MM_VALIDATED_TRANSCRIPTIONAL_TARGETS_OF_AP1_FAMILY_MEMBERS_FRA1_AND_FRA2	9	32	1.35663e-05	0.000180964
BIOCARTA_MM_IL-2_RECEPTOR_BETA_CHAIN_IN_T_CELL_ACTIVATION	9	32	1.35663e-05	0.000180964
MPO_MM_ABNORMAL_FOREBRAIN_DEVELOPMENT	15	86	1.35708e-05	0.000180964
MPO_MM_DECREASED_COMPACT_BONE_THICKNESS	12	57	1.35968e-05	0.000180977
PID_MM_ATF-2_TRANSCRIPTION_FACTOR_NETWORK	12	57	1.35968e-05	0.000180977
PID_MM_IL4-MEDIATED_SIGNALING_EVENTS	12	57	1.35968e-05	0.000180977
GO_BP_MM_INTRACELLULAR_PROTEIN_TRANSPORT	31	279	1.3855e-05	0.000184301
GO_BP_MM_PROTEIN_PROCESSING	10	40	1.42497e-05	0.00018932
KEGG_MM_SPHINGOLIPID_METABOLISM	10	40	1.42497e-05	0.00018932
GO_BP_MM_PLATELET-DERIVED_GROWTH_FACTOR_RECEPTOR_SIGNALING_PATHWAY	8	25	1.4349e-05	0.000190174
MPO_MM_ABNORMAL_TRACHEA_MORPHOLOGY	8	25	1.4349e-05	0.000190174
MPO_MM_VAGINA_ATRESIA	8	25	1.4349e-05	0.000190174
WIKIPATHWAYS_MM_IL-7_SIGNALING_PATHWAY-WP205	8	25	1.4349e-05	0.000190174
MPO_MM_MALE_GERM_CELL_APOPTOSIS	16	97	1.47663e-05	0.000195586
MPO_MM_SMALL_CEREBELLUM	17	108	1.5298e-05	0.000202505
MPO_MM_ABNORMAL_LONG_BONE_HYPERTROPHIC_CHONDROCYTE_ZONE	13	67	1.53589e-05	0.000203188
SMPDB_MM_PENTOSE_PHOSPHATE_PATHWAY	6	13	1.5487e-05	0.000203891
KEGG_MM_FOLATE_BIOSYNTHESIS	6	13	1.5487e-05	0.000203891
MPO_MM_ABNORMAL_FATTY_ACID_LEVEL	6	13	1.5487e-05	0.000203891
MPO_MM_ABNORMAL_KUPFFER_CELL_MORPHOLOGY	6	13	1.5487e-05	0.000203891
MPO_MM_INCREASED_CIRCULATING_RENIN_LEVEL	6	13	1.5487e-05	0.000203891
PID_MM_ERBB_RECEPTOR_SIGNALING_NETWORK	6	13	1.5487e-05	0.000203891
WIKIPATHWAYS_MM_KEAP1-NRF2_PATHWAY-WP3	6	13	1.5487e-05	0.000203891
MOUSECYC_MM_PWY-3841_FORMYLTHF_BIOSYNTHESIS_II	6	13	1.5487e-05	0.000203891
GO_CC_MM_LYSOSOMAL_MEMBRANE	15	87	1.56756e-05	0.000206248
GO_BP_MM_GTP_CATABOLIC_PROCESS	25	203	1.61337e-05	0.000212148
KEGG_MM_NOTCH_SIGNALING_PATHWAY	11	49	1.62274e-05	0.00021325
GO_BP_MM_POSITIVE_REGULATION_OF_PROTEIN_KINASE_B_SIGNALING_CASCADE	12	58	1.63983e-05	0.000214977
GO_BP_MM_MICROTUBULE_CYTOSKELETON_ORGANIZATION	12	58	1.63983e-05	0.000214977
MPO_MM_ABNORMAL_OSTEOBLAST_PHYSIOLOGY	12	58	1.63983e-05	0.000214977
WIKIPATHWAYS_MM_NOTCH_SIGNALING_PATHWAY-WP61	12	58	1.63983e-05	0.000214977
GO_MF_MM_CHROMATIN_BINDING	28	242	1.68213e-05	0.000220389
GO_CC_MM_MITOCHONDRIAL_ENVELOPE	7	19	1.74844e-05	0.000228115
REACTOME_MM_FGB_PATHWAY	7	19	1.74844e-05	0.000228115
MPO_MM_ABNORMAL_AORTIC_VALVE_MORPHOLOGY	7	19	1.74844e-05	0.000228115
BIOCARTA_MM_INHIBITION_OF_CELLULAR_PROLIFERATION_BY_GLEEVEC	7	19	1.74844e-05	0.000228115
BIOCARTA_MM_REGULATION_OF_EIF4E_AND_P70_S6_KINASE	7	19	1.74844e-05	0.000228115
WIKIPATHWAYS_MM_ESTROGEN_SIGNALING_PATHWAY-WP712	7	19	1.74844e-05	0.000228115
TFACTS_MM_NR2F1	7	19	1.74844e-05	0.000228115
REACTOME_MM_APH1B_PATHWAY	9	33	1.78601e-05	0.00023232
REACTOME_MM_INPP5D_PATHWAY	9	33	1.78601e-05	0.00023232
REACTOME_MM_PDGFRA_PATHWAY	9	33	1.78601e-05	0.00023232
REACTOME_MM_PDPK1_PATHWAY	9	33	1.78601e-05	0.00023232
MPO_MM_DECREASED_BONE_MINERAL_CONTENT	9	33	1.78601e-05	0.00023232
MPO_MM_DECREASED_LEAN_BODY_MASS	10	41	1.80376e-05	0.000234489
GO_CC_MM_MICROTUBULE_CYTOSKELETON	15	88	1.80642e-05	0.000234554
MPO_MM_WEAKNESS	15	88	1.80642e-05	0.000234554
MPO_MM_DOMED_CRANIUM	13	68	1.81595e-05	0.000235651
GO_BP_MM_FOREBRAIN_DEVELOPMENT	14	78	1.86064e-05	0.000240875
GO_CC_MM_COLLAGEN	14	78	1.86064e-05	0.000240875
MPO_MM_COMPLETE_EMBRYONIC_LETHALITY_BEFORE_TURNING_OF_EMBRYO	14	78	1.86064e-05	0.000240875
MPO_MM_EPIDERMAL_HYPERPLASIA	14	78	1.86064e-05	0.000240875
MPO_MM_ABNORMAL_SOMITE_DEVELOPMENT	18	121	1.92765e-05	0.000249254
INOH_MM_INTEGRIN	18	121	1.92765e-05	0.000249254
MPO_MM_ABNORMAL_CEREBELLAR_FOLIATION	12	59	1.96904e-05	0.000254303
MPO_MM_ABNORMAL_OUTFLOW_TRACT_DEVELOPMENT	12	59	1.96904e-05	0.000254303
MPO_MM_ABNORMAL_ENDOCARDIUM_MORPHOLOGY	8	26	1.98541e-05	0.000254811
MPO_MM_ABNORMAL_ERYTHROCYTE_OSMOTIC_LYSIS	8	26	1.98541e-05	0.000254811
MPO_MM_ABNORMAL_TONGUE_MORPHOLOGY	8	26	1.98541e-05	0.000254811
MPO_MM_DECREASED_SPLENOCYTE_NUMBER	8	26	1.98541e-05	0.000254811
MPO_MM_DILATED_VASCULATURE	8	26	1.98541e-05	0.000254811
MPO_MM_MALIGNANT_TUMORS	8	26	1.98541e-05	0.000254811
MPO_MM_WRINKLED_SKIN	8	26	1.98541e-05	0.000254811
PID_MM_VEGFR1_SPECIFIC_SIGNALS	8	26	1.98541e-05	0.000254811
NETPATH_MM_IL-7_SIGNALING_PATHWAY	8	26	1.98541e-05	0.000254811
GO_MF_MM_CARBOXYLESTERASE_ACTIVITY	11	50	1.99054e-05	0.000254811
MPO_MM_ABNORMAL_BLOOD_CIRCULATION	11	50	1.99054e-05	0.000254811
MPO_MM_ABNORMAL_JOINT_MORPHOLOGY	11	50	1.99054e-05	0.000254811
PID_MM_ROLE_OF_CALCINEURIN-DEPENDENT_NFAT_SIGNALING_IN_LYMPHOCYTES	11	50	1.99054e-05	0.000254811
MOUSECYC_MM_PWY0-1334_NADH_TO_CYTOCHROME_I-BD-I_OXIDASE_ELECTRON_TRANSFER	11	50	1.99054e-05	0.000254811
MOUSECYC_MM_PWY0-1335_NADH_TO_CYTOCHROME_I-BO-I_OXIDASE_ELECTRON_TRANSFER	11	50	1.99054e-05	0.000254811
MPO_MM_ABNORMAL_BONE_OSSIFICATION	19	133	2.06116e-05	0.000263696
MPO_MM_CIRCLING	15	89	2.0769e-05	0.000265397
MPO_MM_POLYDACTYLY	15	89	2.0769e-05	0.000265397
REACTOME_MM_ARF6_PATHWAY	13	69	2.13978e-05	0.000272471
REACTOME_MM_HSP90AA1_PATHWAY	13	69	2.13978e-05	0.000272471
MPO_MM_ABNORMAL_FOOD_INTAKE	13	69	2.13978e-05	0.000272471
MPO_MM_INCOMPLETE_EMBRYO_TURNING	13	69	2.13978e-05	0.000272471
MPO_MM_INCREASED_ANTI-DOUBLE_STRANDED_DNA_ANTIBODY_LEVEL	13	69	2.13978e-05	0.000272471
MOUSECYC_MM_PWY-3781_AEROBIC_RESPIRATION__ELECTRON_DONOR_II	13	69	2.13978e-05	0.000272471
MPO_MM_DECREASED_VENTRICLE_MUSCLE_CONTRACTILITY	14	79	2.16218e-05	0.000275002
MPO_MM_HUNCHED_POSTURE	14	79	2.16218e-05	0.000275002
MPO_MM_DECREASED_IGM_LEVEL	16	100	2.18813e-05	0.00027814
MPO_MM_ABNORMAL_REPRODUCTIVE_SYSTEM_PHYSIOLOGY	10	42	2.26589e-05	0.000287856
REACTOME_MM_APH1A_PATHWAY	9	34	2.32568e-05	0.000294935
MPO_MM_ABNORMAL_DUODENUM_MORPHOLOGY	9	34	2.32568e-05	0.000294935
WIKIPATHWAYS_MM_INTEGRATED_CANCER_PATHWAY-WP1971	9	34	2.32568e-05	0.000294935
MPO_MM_ABNORMAL_CARTILAGE_DEVELOPMENT	12	60	2.35435e-05	0.000298049
NETPATH_MM_IL5_SIGNALING_PATHWAY	12	60	2.35435e-05	0.000298049
WIKIPATHWAYS_MM_WNT_SIGNALING_PATHWAY-WP428	12	60	2.35435e-05	0.000298049
GO_MF_MM_TRANSMEMBRANE_TRANSPORTER_ACTIVITY	11	51	2.42833e-05	0.000306166
GO_MF_MM_COPPER_ION_BINDING	11	51	2.42833e-05	0.000306166
KEGG_MM_ENDOMETRIAL_CANCER	11	51	2.42833e-05	0.000306166
REACTOME_MM_BAMBI_PATHWAY	11	51	2.42833e-05	0.000306166
REACTOME_MM_FGFR1_PATHWAY	11	51	2.42833e-05	0.000306166
MPO_MM_ABNORMAL_FEMUR_MORPHOLOGY	11	51	2.42833e-05	0.000306166
MPO_MM_ABNORMAL_VASCULAR_WOUND_HEALING	11	51	2.42833e-05	0.000306166
MPO_MM_DECREASED_BONE_MARROW_CELL_NUMBER	16	101	2.48517e-05	0.000313152
MPO_MM_ABNORMAL_INFLAMMATORY_RESPONSE	14	80	2.50589e-05	0.00031558
MIRTARBASE_MM_HSA-MIR-15A	13	70	2.51306e-05	0.000316116
MPO_MM_IMPAIRED_SWIMMING	13	70	2.51306e-05	0.000316116
GO_BP_MM_EXTRACELLULAR_MATRIX_DISASSEMBLY	4	5	2.53662e-05	0.000316881
GO_BP_MM_POSITIVE_REGULATION_OF_GLUCOKINASE_ACTIVITY	4	5	2.53662e-05	0.000316881
GO_BP_MM_NEGATIVE_REGULATION_OF_VERY-LOW-DENSITY_LIPOPROTEIN_PARTICLE_CLEARANCE	4	5	2.53662e-05	0.000316881
GO_BP_MM_NEGATIVE_REGULATION_OF_LIPID_METABOLIC_PROCESS	4	5	2.53662e-05	0.000316881
GO_BP_MM_NEGATIVE_REGULATION_OF_RECEPTOR-MEDIATED_ENDOCYTOSIS	4	5	2.53662e-05	0.000316881
GO_CC_MM_INTERMEDIATE-DENSITY_LIPOPROTEIN_PARTICLE	4	5	2.53662e-05	0.000316881
GO_BP_MM_CITRATE_METABOLIC_PROCESS	4	5	2.53662e-05	0.000316881
KEGG_MM_LYSINE_BIOSYNTHESIS	4	5	2.53662e-05	0.000316881
REACTOME_MM_APOC2_PATHWAY	4	5	2.53662e-05	0.000316881
REACTOME_MM_CETP_PATHWAY	4	5	2.53662e-05	0.000316881
REACTOME_MM_MUC1_PATHWAY	4	5	2.53662e-05	0.000316881
MOUSECYC_MM_ARGININE-SYN4-PWY_ARGININE_BIOSYNTHESIS_IV	4	5	2.53662e-05	0.000316881
SMPDB_MM_LEIGH_SYNDROME	7	20	2.57828e-05	0.000319881
SMPDB_MM_PYRUVATE_METABOLISM	7	20	2.57828e-05	0.000319881
GO_MF_MM_BETA-TUBULIN_BINDING	7	20	2.57828e-05	0.000319881
GO_MF_MM_HYDROLASE_ACTIVITY_ACTING_ON_CARBON-NITROGEN_BUT_NOT_PEPTIDE_BONDS	7	20	2.57828e-05	0.000319881
GO_MF_MM_SIALYLTRANSFERASE_ACTIVITY	7	20	2.57828e-05	0.000319881
REACTOME_MM_CARM1_PATHWAY	7	20	2.57828e-05	0.000319881
REACTOME_MM_EZR_PATHWAY	7	20	2.57828e-05	0.000319881
MPO_MM_ABNORMAL_ADRENAL_CORTEX_MORPHOLOGY	7	20	2.57828e-05	0.000319881
MPO_MM_ABNORMAL_DENDRITIC_SPINE_MORPHOLOGY	7	20	2.57828e-05	0.000319881
MPO_MM_HEAD_SHAKING	7	20	2.57828e-05	0.000319881
BIOCARTA_MM_ASPIRIN_BLOCKS_SIGNALING_PATHWAY_INVOLVED_IN_PLATELET_ACTIVATION	7	20	2.57828e-05	0.000319881
INOH_MM_NICOTINATE_NICOTINAMIDE_METABOLISM	7	20	2.57828e-05	0.000319881
KEGG_MM_HERPES_SIMPLEX_INFECTION	24	196	2.59444e-05	0.000321265
GO_BP_MM_PHOSPHATIDYLCHOLINE_BIOSYNTHETIC_PROCESS	6	14	2.59978e-05	0.000321265
MPO_MM_ABNORMAL_AORTA_ELASTIC_TISSUE_MORPHOLOGY	6	14	2.59978e-05	0.000321265
MPO_MM_INCREASED_CIRCULATING_GLUCAGON_LEVEL	6	14	2.59978e-05	0.000321265
MPO_MM_INCREASED_UTERUS_WEIGHT	6	14	2.59978e-05	0.000321265
MPO_MM_RETINAL_NEOVASCULARIZATION	6	14	2.59978e-05	0.000321265
BIOCARTA_MM_ROLE_OF_EGF_RECEPTOR_TRANSACTIVATION_BY_GPCRS_IN_CARDIAC_HYPERTROPHY	6	14	2.59978e-05	0.000321265
GO_BP_MM_POSITIVE_REGULATION_OF_PHAGOCYTOSIS	8	27	2.7027e-05	0.000330535
GO_CC_MM_HISTONE_DEACETYLASE_COMPLEX	8	27	2.7027e-05	0.000330535
GO_MF_MM_COFACTOR_BINDING	8	27	2.7027e-05	0.000330535
REACTOME_MM_INPP5E_PATHWAY	8	27	2.7027e-05	0.000330535
EHMN_MM_VITAMIN_B3_NICOTINATE_AND_NICOTINAMIDE_METABOLISM	8	27	2.7027e-05	0.000330535
MPO_MM_DECREASED_CEREBRAL_INFARCTION_SIZE	8	27	2.7027e-05	0.000330535
MPO_MM_INCREASED_HEPATOCYTE_PROLIFERATION	8	27	2.7027e-05	0.000330535
MPO_MM_INCREASED_LUNG_WEIGHT	8	27	2.7027e-05	0.000330535
GO_MF_MM_NEUTRAL_AMINO_ACID_TRANSMEMBRANE_TRANSPORTER_ACTIVITY	5	9	2.70519e-05	0.000330535
GO_BP_MM_THALAMUS_DEVELOPMENT	5	9	2.70519e-05	0.000330535
GO_MF_MM_GLUCOCORTICOID_RECEPTOR_BINDING	5	9	2.70519e-05	0.000330535
GO_BP_MM_STEROL_BIOSYNTHETIC_PROCESS	5	9	2.70519e-05	0.000330535
GO_BP_MM_PORPHYRIN-CONTAINING_COMPOUND_BIOSYNTHETIC_PROCESS	5	9	2.70519e-05	0.000330535
GO_BP_MM_REGULATION_OF_PROTEIN_UBIQUITINATION	5	9	2.70519e-05	0.000330535
GO_BP_MM_NEGATIVE_REGULATION_OF_FATTY_ACID_BIOSYNTHETIC_PROCESS	5	9	2.70519e-05	0.000330535
REACTOME_MM_MBD3_PATHWAY	5	9	2.70519e-05	0.000330535
REACTOME_MM_NRIP1_PATHWAY	5	9	2.70519e-05	0.000330535
REACTOME_MM_PLAU_PATHWAY	5	9	2.70519e-05	0.000330535
REACTOME_MM_TBCE_PATHWAY	5	9	2.70519e-05	0.000330535
PANTHER_MM_PYRIMIDINE_METABOLISM	5	9	2.70519e-05	0.000330535
GO_BP_MM_ACTIVATION_OF_MAPK_ACTIVITY	12	61	2.80362e-05	0.000342369
GO_CC_MM_POSTSYNAPTIC_DENSITY	16	102	2.81736e-05	0.000343661
NETPATH_MM_THYROID_STIMULATING_HORMONE_SIGNALING_PATHWAY	16	102	2.81736e-05	0.000343661
GO_CC_MM_NEUROMUSCULAR_JUNCTION	10	43	2.82594e-05	0.000343936
REACTOME_MM_LAMA2_PATHWAY	10	43	2.82594e-05	0.000343936
REACTOME_MM_LAMA5_PATHWAY	10	43	2.82594e-05	0.000343936
TF_MM_FRIARD_TBP	10	43	2.82594e-05	0.000343936
GO_CC_MM_SPINDLE_POLE	13	71	2.94204e-05	0.000357666
MPO_MM_ABSENT_VITELLINE_BLOOD_VESSELS	13	71	2.94204e-05	0.000357666
GO_BP_MM_NEGATIVE_REGULATION_OF_PROTEIN_PHOSPHORYLATION	9	35	2.99767e-05	0.000363616
REACTOME_MM_BMP2_PATHWAY	9	35	2.99767e-05	0.000363616
REACTOME_MM_INSR_PATHWAY	9	35	2.99767e-05	0.000363616
MPO_MM_ABNORMAL_URETER_MORPHOLOGY	9	35	2.99767e-05	0.000363616
GO_MF_MM_RNA_BINDING	48	536	3.00116e-05	0.000363837
GO_MF_MM_GUANYL-NUCLEOTIDE_EXCHANGE_FACTOR_ACTIVITY	15	92	3.11511e-05	0.000377231
MPO_MM_ABNORMAL_EYE_MORPHOLOGY	15	92	3.11511e-05	0.000377231
TF_MM_FRIARD_STAT1	16	103	3.18823e-05	0.00038587
REACTOME_MM_CEBPB_PATHWAY	12	62	3.32554e-05	0.000401818
MPO_MM_ABNORMAL_CEREBELLAR_GRANULE_LAYER	12	62	3.32554e-05	0.000401818
MPO_MM_DECREASED_IMMATURE_B_CELL_NUMBER	12	62	3.32554e-05	0.000401818
MPO_MM_ABNORMAL_CD4-POSITIVE_T_CELL_PHYSIOLOGY	14	82	3.33995e-05	0.000403335
REACTOME_MM_GAB1_PATHWAY	13	72	3.43361e-05	0.000413956
REACTOME_MM_GAB2_PATHWAY	13	72	3.43361e-05	0.000413956
MPO_MM_SMALL_LIVER	13	72	3.43361e-05	0.000413956
MPO_MM_ALTERED_RESPONSE_TO_MYOCARDIAL_INFARCTION	10	44	3.50038e-05	0.000421538
MPO_MM_SMALL_PLACENTA	10	44	3.50038e-05	0.000421538
MPO_MM_ABNORMAL_BONE_MINERALIZATION	17	115	3.52799e-05	0.000424628
GO_BP_MM_NEURON_DIFFERENTIATION	15	93	3.55077e-05	0.000426662
REACTOME_MM_APC_PATHWAY	15	93	3.55077e-05	0.000426662
REACTOME_MM_GNA15_PATHWAY	15	93	3.55077e-05	0.000426662
GO_MF_MM_ENDOPEPTIDASE_ACTIVITY	11	53	3.55817e-05	0.000426843
GO_BP_MM_NEGATIVE_REGULATION_OF_SEQUENCE-SPECIFIC_DNA_BINDING_TRANSCRIPTION_FACTOR_ACTIVITY	11	53	3.55817e-05	0.000426843
MPO_MM_ABNORMAL_SPLENIC_CELL_RATIO	11	53	3.55817e-05	0.000426843
GO_CC_MM_LATERAL_PLASMA_MEMBRANE	8	28	3.62474e-05	0.000432681
REACTOME_MM_LAMB4_PATHWAY	8	28	3.62474e-05	0.000432681
REACTOME_MM_PPP2R1A_PATHWAY	8	28	3.62474e-05	0.000432681
MPO_MM_ABNORMAL_BLOOD-BRAIN_BARRIER_FUNCTION	8	28	3.62474e-05	0.000432681
MPO_MM_ABNORMAL_MICROGLIAL_CELL_PHYSIOLOGY	8	28	3.62474e-05	0.000432681
MPO_MM_ABNORMAL_SEMILUNAR_VALVE_MORPHOLOGY	8	28	3.62474e-05	0.000432681
MPO_MM_DECREASED_CIRCULATING_PROGESTERONE_LEVEL	8	28	3.62474e-05	0.000432681
MPO_MM_DECREASED_HEPATOCYTE_PROLIFERATION	8	28	3.62474e-05	0.000432681
MPO_MM_SENSORINEURAL_HEARING_LOSS	8	28	3.62474e-05	0.000432681
GO_CC_MM_FILAMENTOUS_ACTIN	7	21	3.70707e-05	0.000441056
GO_MF_MM_CATION_TRANSMEMBRANE_TRANSPORTER_ACTIVITY	7	21	3.70707e-05	0.000441056
REACTOME_MM_FGA_PATHWAY	7	21	3.70707e-05	0.000441056
EHMN_MM_PORPHYRIN_METABOLISM	7	21	3.70707e-05	0.000441056
EHMN_MM_PROPANOATE_METABOLISM	7	21	3.70707e-05	0.000441056
TFACTS_MM_FOXA2	7	21	3.70707e-05	0.000441056
GO_BP_MM_NEGATIVE_REGULATION_OF_TRANSFORMING_GROWTH_FACTOR_BETA_RECEPTOR_SIGNALING_PATHWAY	9	36	3.82711e-05	0.000454096
REACTOME_MM_RHOA_PATHWAY	9	36	3.82711e-05	0.000454096
MPO_MM_ABNORMAL_HEART_VALVE_MORPHOLOGY	9	36	3.82711e-05	0.000454096
MPO_MM_MICROGNATHIA	9	36	3.82711e-05	0.000454096
MPO_MM_SKIN_PAPILLOMA	9	36	3.82711e-05	0.000454096
MPO_MM_ABNORMAL_PURKINJE_CELL_MORPHOLOGY	14	83	3.84157e-05	0.000455564
REACTOME_MM_CBLC_PATHWAY	12	63	3.92971e-05	0.000465255
REACTOME_MM_DVL1L1_PATHWAY	12	63	3.92971e-05	0.000465255
REACTOME_MM_JAK2_PATHWAY	12	63	3.92971e-05	0.000465255
KEGG_MM_REGULATION_OF_ACTIN_CYTOSKELETON	25	214	3.95e-05	0.000467403
PID_MM_INTEGRINS_IN_ANGIOGENESIS	13	73	3.99532e-05	0.000472508
MPO_MM_INCREASED_INFLAMMATORY_RESPONSE	15	94	4.03915e-05	0.000477432
GO_BP_MM_ENDOCYTOSIS	16	105	4.06156e-05	0.00047982
SMPDB_MM_INOSITOL_METABOLISM	6	15	4.15655e-05	0.000488126
GO_MF_MM_CARBONATE_DEHYDRATASE_ACTIVITY	6	15	4.15655e-05	0.000488126
REACTOME_MM_CDC25C_PATHWAY	6	15	4.15655e-05	0.000488126
REACTOME_MM_PCK1_PATHWAY	6	15	4.15655e-05	0.000488126
MIRTARBASE_MM_HSA-MIR-19A	6	15	4.15655e-05	0.000488126
MPO_MM_ABNORMAL_ENDOMETRIUM_MORPHOLOGY	6	15	4.15655e-05	0.000488126
MPO_MM_ABNORMAL_EPIDIDYMIS_EPITHELIUM_MORPHOLOGY	6	15	4.15655e-05	0.000488126
MPO_MM_ABNORMAL_MITOCHONDRIAL_ATP_SYNTHESIS_COUPLED_ELECTRON_TRANSPORT	6	15	4.15655e-05	0.000488126
MPO_MM_ABNORMAL_PROSTATE_GLAND_EPITHELIUM_MORPHOLOGY	6	15	4.15655e-05	0.000488126
MPO_MM_INCREASED_INCIDENCE_OF_IONIZING_RADIATION-INDUCED_TUMORS	6	15	4.15655e-05	0.000488126
MPO_MM_INCREASED_PROSTAGLANDIN_LEVEL	6	15	4.15655e-05	0.000488126
INOH_MM_GPCR_SIGNALING-G_ALPHA_S_EPAC_AND_ERK	27	241	4.16454e-05	0.0004888
GO_BP_MM_RESPONSE_TO_WOUNDING	11	54	4.27564e-05	0.000499951
REACTOME_MM_ITGA8_PATHWAY	11	54	4.27564e-05	0.000499951
MPO_MM_ABNORMAL_CEREBELLUM_EXTERNAL_GRANULE_CELL_LAYER_MORPHOLOGY	11	54	4.27564e-05	0.000499951
MPO_MM_ABNORMAL_GASTRULATION	11	54	4.27564e-05	0.000499951
MPO_MM_ABNORMAL_T-HELPER_2_PHYSIOLOGY	11	54	4.27564e-05	0.000499951
MPO_MM_INCREASED_SUSCEPTIBILITY_TO_ENDOTOXIN_SHOCK	11	54	4.27564e-05	0.000499951
MOUSECYC_MM_PWY-4302_AEROBIC_RESPIRATION__ELECTRON_DONOR_III	11	54	4.27564e-05	0.000499951
REACTOME_MM_ACVR1B_PATHWAY	10	45	4.30772e-05	0.000502351
REACTOME_MM_ARF1_PATHWAY	10	45	4.30772e-05	0.000502351
REACTOME_MM_LYN_PATHWAY	10	45	4.30772e-05	0.000502351
MPO_MM_DECREASED_NEURON_APOPTOSIS	10	45	4.30772e-05	0.000502351
MPO_MM_OSTEOPOROSIS	10	45	4.30772e-05	0.000502351
MPO_MM_ABNORMAL_B_CELL_PHYSIOLOGY	17	117	4.4179e-05	0.000514924
MPO_MM_DECREASED_CD4-POSITIVE_T_CELL_NUMBER	21	165	4.56828e-05	0.000532167
GO_MF_MM_TRANSPORTER_ACTIVITY	24	203	4.60296e-05	0.00053592
KEGG_MM_COLORECTAL_CANCER	12	64	4.62671e-05	0.000537891
INOH_MM_IL-1_JNK	12	64	4.62671e-05	0.000537891
MPO_MM_INCREASED_LEUKOCYTE_CELL_NUMBER	18	129	4.62731e-05	0.000537891
MPO_MM_EYELIDS_OPEN_AT_BIRTH	13	74	4.63541e-05	0.000538545
GO_BP_MM_CELLULAR_RESPONSE_TO_TRANSFORMING_GROWTH_FACTOR_BETA_STIMULUS	8	29	4.79532e-05	0.000554458
GO_CC_MM_INTERNAL_SIDE_OF_PLASMA_MEMBRANE	8	29	4.79532e-05	0.000554458
REACTOME_MM_SHC1_PATHWAY	8	29	4.79532e-05	0.000554458
MPO_MM_ABNORMAL_LYMPH_NODE_CELL_RATIO	8	29	4.79532e-05	0.000554458
MPO_MM_ABNORMAL_NITRIC_OXIDE_HOMEOSTASIS	8	29	4.79532e-05	0.000554458
MPO_MM_ABNORMAL_PANCREAS_PHYSIOLOGY	8	29	4.79532e-05	0.000554458
MPO_MM_BLISTERING	8	29	4.79532e-05	0.000554458
MPO_MM_COMPLETE_EMBRYONIC_LETHALITY_BETWEEN_IMPLANTATION_AND_PLACENTATION	8	29	4.79532e-05	0.000554458
PID_MM_CD40_CD40L_SIGNALING	8	29	4.79532e-05	0.000554458
GO_BP_MM_POSITIVE_REGULATION_OF_FIBROBLAST_PROLIFERATION	9	37	4.84254e-05	0.000558137
GO_MF_MM_CATION_BINDING	9	37	4.84254e-05	0.000558137
GO_BP_MM_PROTEIN_HETEROOLIGOMERIZATION	9	37	4.84254e-05	0.000558137
MIRTARBASE_MM_HSA-MIR-34A	9	37	4.84254e-05	0.000558137
WIKIPATHWAYS_MM_FAS_PATHWAY_AND_STRESS_INDUCTION_OF_HSP_REGULATION-WP314	9	37	4.84254e-05	0.000558137
WIKIPATHWAYS_MM_VITAMIN_A_AND_CAROTENOID_METABOLISM-WP716	9	37	4.84254e-05	0.000558137
MPO_MM_INCREASED_URINE_PROTEIN_LEVEL	14	85	5.04601e-05	0.00058128
KEGG_MM_ACUTE_MYELOID_LEUKEMIA	11	55	5.11408e-05	0.000588498
MPO_MM_DECREASED_SPLEEN_WEIGHT	11	55	5.11408e-05	0.000588498
KEGG_MM_AXON_GUIDANCE	18	130	5.13272e-05	0.000590331
GO_MF_MM_APOLIPOPROTEIN_BINDING	5	10	5.19561e-05	0.000592529
GO_BP_MM_ESTROGEN_METABOLIC_PROCESS	5	10	5.19561e-05	0.000592529
GO_BP_MM_POSITIVE_REGULATION_OF_NITRIC-OXIDE_SYNTHASE_ACTIVITY	5	10	5.19561e-05	0.000592529
GO_BP_MM_OVULATION	5	10	5.19561e-05	0.000592529
GO_BP_MM_GENE_EXPRESSION	5	10	5.19561e-05	0.000592529
KEGG_MM_SYNTHESIS_AND_DEGRADATION_OF_KETONE_BODIES	5	10	5.19561e-05	0.000592529
REACTOME_MM_AREG_PATHWAY	5	10	5.19561e-05	0.000592529
REACTOME_MM_FOXA1_PATHWAY	5	10	5.19561e-05	0.000592529
REACTOME_MM_PPP2R2A_PATHWAY	5	10	5.19561e-05	0.000592529
REACTOME_MM_TBCD_PATHWAY	5	10	5.19561e-05	0.000592529
EHMN_MM_BIOPTERIN_METABOLISM	5	10	5.19561e-05	0.000592529
MPO_MM_ABNORMAL_COMPLEMENT_PATHWAY	5	10	5.19561e-05	0.000592529
MOUSECYC_MM_PWY3DJ-35583_BIOSYNTHESIS_OF_PROSTAGLANDINS	5	10	5.19561e-05	0.000592529
MOUSECYC_MM_PWY66-4_CHOLESTEROL_BIOSYNTHESIS_III_VIA_DESMOSTEROL	5	10	5.19561e-05	0.000592529
MPO_MM_ABNORMAL_NEUTROPHIL_PHYSIOLOGY	15	96	5.19586e-05	0.000592529
WIKIPATHWAYS_MM_WNT_SIGNALING_PATHWAY_AND_PLURIPOTENCY-WP399	15	96	5.19586e-05	0.000592529
GO_BP_MM_PROTEIN_K63-LINKED_UBIQUITINATION	7	22	5.21177e-05	0.000592529
GO_BP_MM_CYTOLYSIS	7	22	5.21177e-05	0.000592529
MPO_MM_ABNORMAL_PRODUCTION_OF_SURFACTANT	7	22	5.21177e-05	0.000592529
MPO_MM_DECREASED_CREATININE_CLEARANCE	7	22	5.21177e-05	0.000592529
MPO_MM_EARLY_REPRODUCTIVE_SENESCENCE	7	22	5.21177e-05	0.000592529
BIOCARTA_MM_CASPASE_CASCADE_IN_APOPTOSIS	7	22	5.21177e-05	0.000592529
GO_BP_MM_NEGATIVE_REGULATION_OF_INFLAMMATORY_RESPONSE	10	46	5.26864e-05	0.000596811
KEGG_MM_ABC_TRANSPORTERS	10	46	5.26864e-05	0.000596811
REACTOME_MM_NGF_PATHWAY	10	46	5.26864e-05	0.000596811
MPO_MM_ABNORMAL_HAIR_SHAFT_MORPHOLOGY	10	46	5.26864e-05	0.000596811
MPO_MM_ABNORMAL_LUNG_VASCULATURE_MORPHOLOGY	10	46	5.26864e-05	0.000596811
MPO_MM_ABNORMAL_MAMMARY_GLAND_GROWTH_DURING_PREGNANCY	10	46	5.26864e-05	0.000596811
MPO_MM_DECREASED_HEART_WEIGHT	10	46	5.26864e-05	0.000596811
GO_BP_MM_NOTCH_SIGNALING_PATHWAY	12	65	5.42815e-05	0.000613283
MPO_MM_ABNORMAL_ASTROCYTE_MORPHOLOGY	12	65	5.42815e-05	0.000613283
MPO_MM_PRENATAL_LETHALITY	12	65	5.42815e-05	0.000613283
PID_MM_P75-NTR-MEDIATED_SIGNALING	12	65	5.42815e-05	0.000613283
INOH_MM_TLR_P38	12	65	5.42815e-05	0.000613283
GO_MF_MM_METALLOENDOPEPTIDASE_ACTIVITY	17	119	5.50074e-05	0.000621161
INOH_MM_GPCR_SIGNALING-G_ALPHA_I	26	232	5.68929e-05	0.000641786
INOH_MM_GPCR_SIGNALING-PERTUSSIS_TOXIN	26	232	5.68929e-05	0.000641786
MPO_MM_DECREASED_IGG1_LEVEL	16	108	5.76713e-05	0.00065023
REACTOME_MM_CRKL_PATHWAY	15	97	5.8762e-05	0.000661841
REACTOME_MM_GNA11_PATHWAY	15	97	5.8762e-05	0.000661841
GO_BP_MM_REGULATION_OF_CELL_GROWTH	9	38	6.07614e-05	0.000682241
REACTOME_MM_ETS2_PATHWAY	9	38	6.07614e-05	0.000682241
REACTOME_MM_MAP3K7_PATHWAY	9	38	6.07614e-05	0.000682241
MPO_MM_DECREASED_WIDTH_OF_HYPERTROPHIC_CHONDROCYTE_ZONE	9	38	6.07614e-05	0.000682241
MPO_MM_IMPAIRED_ADAPTIVE_THERMOGENESIS	9	38	6.07614e-05	0.000682241
MPO_MM_INCREASED_WHITE_ADIPOSE_TISSUE_AMOUNT	9	38	6.07614e-05	0.000682241
REACTOME_MM_JAK3_PATHWAY	11	56	6.08986e-05	0.000682723
MPO_MM_ABNORMAL_AXON_GUIDANCE	11	56	6.08986e-05	0.000682723
MPO_MM_IMPAIRED_HEARING	11	56	6.08986e-05	0.000682723
GO_MF_MM_BINDING	35	358	6.10541e-05	0.000684114
MPO_MM_ABNORMAL_BONE_MARROW_CELL_MORPHOLOGY_DEVELOPMENT	13	76	6.18757e-05	0.000692963
GO_BP_MM_PROTEOLYSIS_INVOLVED_IN_CELLULAR_PROTEIN_CATABOLIC_PROCESS	8	30	6.26456e-05	0.000699425
REACTOME_MM_NGFR_PATHWAY	8	30	6.26456e-05	0.000699425
MPO_MM_ABNORMAL_VASCULAR_BRANCHING_MORPHOGENESIS	8	30	6.26456e-05	0.000699425
MPO_MM_INCREASED_IMMATURE_B_CELL_NUMBER	8	30	6.26456e-05	0.000699425
WIKIPATHWAYS_MM_ALPHA_6_BETA_4_SIGNALING_PATHWAY-WP244	8	30	6.26456e-05	0.000699425
WIKIPATHWAYS_MM_PROSTAGLANDIN_SYNTHESIS_AND_REGULATION-WP98	8	30	6.26456e-05	0.000699425
REACTOME_MM_ARR3_PATHWAY	12	66	6.34675e-05	0.000707512
MPO_MM_INCREASED_INTERLEUKIN-6_SECRETION	12	66	6.34675e-05	0.000707512
WIKIPATHWAYS_MM_G1_TO_S_CELL_CYCLE_CONTROL-WP45	12	66	6.34675e-05	0.000707512
SMPDB_MM_TRYPTOPHAN_METABOLISM	6	16	6.37997e-05	0.000707948
GO_BP_MM_VASODILATION	6	16	6.37997e-05	0.000707948
GO_MF_MM_TRIGLYCERIDE_LIPASE_ACTIVITY	6	16	6.37997e-05	0.000707948
GO_BP_MM_CHOLESTEROL_TRANSPORT	6	16	6.37997e-05	0.000707948
MPO_MM_ABNORMAL_BILE_SALT_HOMEOSTASIS	6	16	6.37997e-05	0.000707948
MPO_MM_ABNORMAL_RENAL_GLOMERULAR_CAPSULE_MORPHOLOGY	6	16	6.37997e-05	0.000707948
MPO_MM_ABSENT_OTOLITHS	6	16	6.37997e-05	0.000707948
MPO_MM_AMINOACIDURIA	6	16	6.37997e-05	0.000707948
MPO_MM_INCREASED_TYPE_II_PNEUMOCYTE_NUMBER	6	16	6.37997e-05	0.000707948
REACTOME_MM_ABL1_PATHWAY	10	47	6.40619e-05	0.000709772
REACTOME_MM_ACVR2A_PATHWAY	10	47	6.40619e-05	0.000709772
MPO_MM_SHORT_STRIDE_LENGTH	10	47	6.40619e-05	0.000709772
MPO_MM_DECREASED_BIRTH_BODY_SIZE	16	109	6.46133e-05	0.000715516
KEGG_MM_GAP_JUNCTION	14	87	6.56797e-05	0.000726956
MPO_MM_SHORT_LIMBS	15	98	6.63333e-05	0.000733817
KEGG_MM_OSTEOCLAST_DIFFERENTIATION	17	121	6.81134e-05	0.000752743
MPO_MM_CACHEXIA	17	121	6.81134e-05	0.000752743
GO_CC_MM_SYNAPSE	19	145	6.92693e-05	0.000765129
MPO_MM_ABNORMAL_SKIN_CONDITION	13	77	7.12008e-05	0.000786064
GO_MF_MM_3_5-CYCLIC-NUCLEOTIDE_PHOSPHODIESTERASE_ACTIVITY	7	23	7.18175e-05	0.000786089
GO_MF_MM_INSULIN-LIKE_GROWTH_FACTOR_BINDING	7	23	7.18175e-05	0.000786089
GO_BP_MM_IRON_ION_HOMEOSTASIS	7	23	7.18175e-05	0.000786089
GO_BP_MM_SUBSTRATE_ADHESION-DEPENDENT_CELL_SPREADING	7	23	7.18175e-05	0.000786089
GO_BP_MM_CELL_DEVELOPMENT	7	23	7.18175e-05	0.000786089
GO_BP_MM_GLUCOSE_TRANSPORT	7	23	7.18175e-05	0.000786089
GO_BP_MM_REGULATION_OF_ARF_GTPASE_ACTIVITY	7	23	7.18175e-05	0.000786089
GO_MF_MM_ARF_GTPASE_ACTIVATOR_ACTIVITY	7	23	7.18175e-05	0.000786089
REACTOME_MM_ESR2_PATHWAY	7	23	7.18175e-05	0.000786089
EHMN_MM_FRUCTOSE_AND_MANNOSE_METABOLISM	7	23	7.18175e-05	0.000786089
MPO_MM_ABNORMAL_BLOOD_VESSEL_PHYSIOLOGY	7	23	7.18175e-05	0.000786089
MPO_MM_ABNORMAL_EYE_ANTERIOR_CHAMBER_MORPHOLOGY	7	23	7.18175e-05	0.000786089
MPO_MM_ABNORMAL_MACROPHAGE_CHEMOTAXIS	7	23	7.18175e-05	0.000786089
MPO_MM_DECREASED_RESPIRATORY_QUOTIENT	7	23	7.18175e-05	0.000786089
MPO_MM_INCREASED_BRAIN_WEIGHT	7	23	7.18175e-05	0.000786089
INOH_MM_PENTOSE_PHOSPHATE_CYCLE	7	23	7.18175e-05	0.000786089
TF_MM_ZHAO_RARB	7	23	7.18175e-05	0.000786089
GO_CC_MM_CONDENSED_CHROMOSOME_KINETOCHORE	11	57	7.22099e-05	0.000787214
GO_CC_MM_KINETOCHORE	11	57	7.22099e-05	0.000787214
GO_BP_MM_EMBRYONIC_LIMB_MORPHOGENESIS	11	57	7.22099e-05	0.000787214
REACTOME_MM_COL18A1_PATHWAY	11	57	7.22099e-05	0.000787214
REACTOME_MM_COL9A3_PATHWAY	11	57	7.22099e-05	0.000787214
MPO_MM_ABNORMAL_LACTATION	11	57	7.22099e-05	0.000787214
MPO_MM_COCHLEAR_OUTER_HAIR_CELL_DEGENERATION	11	57	7.22099e-05	0.000787214
MPO_MM_INCREASED_CIRCULATING_INTERLEUKIN-6_LEVEL	11	57	7.22099e-05	0.000787214
GO_BP_MM_FRUCTOSE_METABOLIC_PROCESS	4	6	7.31885e-05	0.000792323
GO_BP_MM_AMYLOID_PRECURSOR_PROTEIN_CATABOLIC_PROCESS	4	6	7.31885e-05	0.000792323
GO_BP_MM_POSITIVE_REGULATION_OF_SUPEROXIDE_ANION_GENERATION	4	6	7.31885e-05	0.000792323
GO_BP_MM_POSITIVE_REGULATION_OF_CHOLESTEROL_ESTERIFICATION	4	6	7.31885e-05	0.000792323
[truncated: 19,750 more rows]
