# Supplementary material for: Genome-Wide ChIPseq Analysis of AhR, COUP-TF, and HNF4 Enrichment in TCDD-Treated Mouse Liver
Source: Int J Mol Sci. 2022 Jan 29;23(3):1558. doi: 10.3390/ijms23031558 (PMC8836158; doi:10.3390/ijms23031558)
Supplement: Supplementary file 1 [file ijms-23-01558-s001.zip › Supplementary_File S3.xlsx]

## Sheet: Liver-Specific DEGs
TermID	genes	all	pval	padj
AhrInduced_HnfNoChange.txt	126	2817	1.80661e-28	7.40709e-27
HnfNoChange.txt	151	4615	2.95891e-25	6.06577e-24
AhrInduced.txt	127	3245	1.38511e-22	1.89299e-21
AhrInduced_HnfInduced.txt	64	1244	2.72736e-13	2.79554e-12
AhrInduced_CouptfRepressed_HnfNoChange.txt	62	1411	8.26634e-10	6.7784e-09
AhrInduced_CouptfNoChange_HnfNoChange.txt	84	2311	1.79655e-09	1.22764e-08
HnfInduced.txt	69	1768	9.80241e-09	5.74141e-08
AhrInduced_CouptfRepressed.txt	62	1506	1.1927e-08	6.11257e-08
AhrInduced_CouptfNoChange.txt	84	2486	7.98436e-08	3.32253e-07
AhrInduced_CouptfNoChange_HnfInduced.txt	48	1067	8.10374e-08	3.32253e-07
AhrInduced_HnfRepressed.txt	32	599	5.3755e-07	2.00359e-06
CouptfRepressed_HnfNoChange.txt	70	2025	1.18994e-06	4.06565e-06
AhrInduced_CouptfRepressed_HnfInduced.txt	33	726	1.225e-05	3.86346e-05
HnfRepressed.txt	35	877	0.000100453	0.000294091
CouptfNoChange_HnfInduced.txt	50	1451	0.000107594	0.000294091
AhrInduced_CouptfNoChange_HnfRepressed.txt	23	489	0.000189497	0.000485586
CouptfRepressed_HnfInduced.txt	36	949	0.000219433	0.000529222
CouptfRepressed.txt	70	2355	0.000291391	0.000644258
CouptfNoChange_HnfNoChange.txt	97	3604	0.000298559	0.000644258
AhrInduced_CouptfInduced_HnfInduced.txt	17	360	0.00132062	0.00270727
AhrInduced_CouptfInduced_HnfNoChange.txt	23	607	0.00361369	0.00705531
CouptfInduced_HnfInduced.txt	17	419	0.00634398	0.0118229
CouptfNoChange_HnfRepressed.txt	23	653	0.00869581	0.0155012
AhrInduced_CouptfRepressed_HnfRepressed.txt	15	372	0.0107495	0.0183637
AhrInduced_CouptfInduced.txt	23	669	0.0114663	0.0188047
AhrInduced_CouptfInduced_HnfRepressed.txt	8	161	0.0192955	0.0304274
CouptfInduced_HnfNoChange.txt	24	792	0.038873	0.0590294
CouptfRepressed_HnfRepressed.txt	16	478	0.0409442	0.059954
CouptfInduced_HnfRepressed.txt	8	197	0.053874	0.0761667
CouptfNoChange.txt	97	4170	0.0630828	0.0862132
CouptfInduced.txt	24	941	0.173289	0.229189
AhrNoChange.txt	0	1	1	1
AhrNoChange_CouptfInduced.txt	0	1	1	1
AhrNoChange_CouptfInduced_HnfInduced.txt	0	0	1	1
AhrNoChange_CouptfNoChange.txt	0	1	1	1
AhrNoChange_CouptfNoChange_HnfNoChange.txt	0	1	1	1
AhrNoChange_CouptfRepressed.txt	0	1	1	1
AhrNoChange_CouptfRepressed_HnfRepressed.txt	0	1	1	1
AhrNoChange_HnfInduced.txt	0	0	1	1
AhrNoChange_HnfNoChange.txt	0	1	1	1
AhrNoChange_HnfRepressed.txt	0	1	1	1

## Sheet: PHH Secretome DEGs
TermID	genes	all	pval	padj
HnfNoChange.txt	314	4615	3.42945e-19	1.2798e-17
AhrInduced_HnfNoChange.txt	227	2817	6.24293e-19	1.2798e-17
AhrInduced.txt	239	3245	6.51855e-15	8.90869e-14
AhrInduced_CouptfNoChange_HnfNoChange.txt	180	2311	5.77615e-12	5.92055e-11
CouptfNoChange_HnfNoChange.txt	247	3604	1.74249e-11	1.42885e-10
AhrInduced_CouptfNoChange.txt	183	2486	6.63121e-10	4.53133e-09
CouptfRepressed_HnfNoChange.txt	154	2025	5.07572e-09	2.97292e-08
CouptfNoChange.txt	265	4170	1.25968e-08	6.45587e-08
AhrInduced_CouptfRepressed_HnfNoChange.txt	113	1411	1.19095e-07	5.42544e-07
CouptfRepressed.txt	167	2355	1.49682e-07	6.13697e-07
AhrInduced_CouptfRepressed.txt	116	1506	6.39162e-07	2.38233e-06
AhrInduced_HnfInduced.txt	93	1244	4.39403e-05	0.000150129
AhrInduced_CouptfNoChange_HnfInduced.txt	79	1067	0.000268034	0.000845339
AhrInduced_CouptfRepressed_HnfInduced.txt	58	726	0.000303973	0.000864377
CouptfInduced_HnfNoChange.txt	62	792	0.000321311	0.000864377
CouptfInduced.txt	71	941	0.000337318	0.000864377
CouptfRepressed_HnfInduced.txt	71	949	0.000432949	0.00104417
CouptfInduced_HnfInduced.txt	37	419	0.000674186	0.00153565
HnfInduced.txt	117	1768	0.000731051	0.00157753
AhrInduced_CouptfInduced.txt	52	669	0.00120646	0.00247324
AhrInduced_CouptfInduced_HnfNoChange.txt	48	607	0.00130979	0.00255722
CouptfNoChange_HnfInduced.txt	95	1451	0.00388818	0.00724616
AhrInduced_CouptfInduced_HnfInduced.txt	29	360	0.00926332	0.0165129
CouptfInduced_HnfRepressed.txt	18	197	0.0114621	0.0195811
AhrInduced_CouptfInduced_HnfRepressed.txt	15	161	0.0170322	0.0279328
AhrInduced_HnfRepressed.txt	39	599	0.0649145	0.102365
CouptfRepressed_HnfRepressed.txt	31	478	0.0964579	0.146473
AhrInduced_CouptfNoChange_HnfRepressed.txt	31	489	0.11955	0.175055
CouptfNoChange_HnfRepressed.txt	40	653	0.124693	0.17629
AhrInduced_CouptfRepressed_HnfRepressed.txt	24	372	0.137051	0.187303
HnfRepressed.txt	51	877	0.170935	0.226075
AhrNoChange.txt	0	1	1	1
AhrNoChange_CouptfInduced.txt	0	1	1	1
AhrNoChange_CouptfInduced_HnfInduced.txt	0	0	1	1
AhrNoChange_CouptfNoChange.txt	0	1	1	1
AhrNoChange_CouptfNoChange_HnfNoChange.txt	0	1	1	1
AhrNoChange_CouptfRepressed.txt	0	1	1	1
AhrNoChange_CouptfRepressed_HnfRepressed.txt	0	1	1	1
AhrNoChange_HnfInduced.txt	0	0	1	1
AhrNoChange_HnfNoChange.txt	0	1	1	1
AhrNoChange_HnfRepressed.txt	0	1	1	1

## Sheet: HNF4a Dependent DEGs
TermID	genes	all	pval	padj
HnfNoChange.txt	473	4615	4.63932e-29	1.90212e-27
AhrInduced_HnfNoChange.txt	323	2817	3.43246e-21	7.03654e-20
AhrInduced.txt	344	3245	7.72172e-17	1.0553e-15
CouptfRepressed_HnfNoChange.txt	228	2025	4.51701e-12	4.30458e-11
AhrInduced_CouptfNoChange_HnfNoChange.txt	252	2311	5.24949e-12	4.30458e-11
AhrInduced_CouptfRepressed_HnfNoChange.txt	166	1411	6.85532e-10	4.68447e-09
AhrInduced_CouptfNoChange.txt	257	2486	1.30522e-09	7.52076e-09
CouptfRepressed.txt	246	2355	1.46746e-09	7.52076e-09
AhrInduced_CouptfRepressed.txt	168	1506	3.16829e-08	1.44333e-07
CouptfNoChange_HnfNoChange.txt	334	3604	3.29464e-07	1.3508e-06
AhrInduced_HnfRepressed.txt	78	599	1.32968e-06	4.95608e-06
AhrInduced_CouptfInduced_HnfNoChange.txt	75	607	1.52363e-05	5.20575e-05
HnfRepressed.txt	98	877	4.84599e-05	0.000152835
CouptfInduced_HnfNoChange.txt	90	792	5.56995e-05	0.000158594
CouptfNoChange.txt	364	4170	5.8022e-05	0.000158594
AhrInduced_HnfInduced.txt	128	1244	0.000143426	0.000367529
AhrInduced_CouptfInduced.txt	76	669	0.000229154	0.000534515
HnfInduced.txt	171	1768	0.000234665	0.000534515
AhrInduced_CouptfNoChange_HnfRepressed.txt	59	489	0.000255043	0.000550355
AhrInduced_CouptfNoChange_HnfInduced.txt	109	1067	0.000663429	0.00136003
AhrInduced_CouptfRepressed_HnfRepressed.txt	46	372	0.000728968	0.00142322
CouptfRepressed_HnfRepressed.txt	56	478	0.00076572	0.00142702
CouptfInduced.txt	97	941	0.00102377	0.00182498
AhrInduced_CouptfInduced_HnfInduced.txt	44	360	0.00120508	0.00205868
CouptfNoChange_HnfRepressed.txt	71	653	0.00129401	0.00212218
CouptfInduced_HnfInduced.txt	49	419	0.0016931	0.00266988
AhrInduced_CouptfInduced_HnfRepressed.txt	21	161	0.0110351	0.016757
CouptfInduced_HnfRepressed.txt	24	197	0.0154227	0.0225833
CouptfNoChange_HnfInduced.txt	131	1451	0.0183882	0.0259972
AhrInduced_CouptfRepressed_HnfInduced.txt	68	726	0.0436678	0.0596793
CouptfRepressed_HnfInduced.txt	85	949	0.0644518	0.0852427
AhrNoChange.txt	0	1	1	1
AhrNoChange_CouptfInduced.txt	0	1	1	1
AhrNoChange_CouptfInduced_HnfInduced.txt	0	0	1	1
AhrNoChange_CouptfNoChange.txt	0	1	1	1
AhrNoChange_CouptfNoChange_HnfNoChange.txt	0	1	1	1
AhrNoChange_CouptfRepressed.txt	0	1	1	1
AhrNoChange_CouptfRepressed_HnfRepressed.txt	0	1	1	1
AhrNoChange_HnfInduced.txt	0	0	1	1
AhrNoChange_HnfNoChange.txt	0	1	1	1
AhrNoChange_HnfRepressed.txt	0	1	1	1
